# Supplementary material for: Short Duration Alagebrium Chloride Therapy Prediabetes Does Not Inhibit Progression to Autoimmune Diabetes in an Experimental Model
Source: Metabolites. 2021 Jun 28;11(7):426. doi: 10.3390/metabo11070426 (PMC8305727; doi:10.3390/metabo11070426)
Supplement: Supplementary file 1 [file metabolites-11-00426-s001.zip]

Archive with 4 entries (4 files):
- metabolites-1251767-supplementary.pdf
- Table S1 Kb peptide.xlsx
- Table S2 Db peptide.xlsx
- Table S3-proteomics.xlsx
