# Supplementary material for: Short Duration Alagebrium Chloride Therapy Prediabetes Does Not Inhibit Progression to Autoimmune Diabetes in an Experimental Model
Source: Metabolites. 2021 Jun 28;11(7):426. doi: 10.3390/metabo11070426 (PMC8305727; doi:10.3390/metabo11070426)
Supplement: Supplementary file 1 [file metabolites-11-00426-s001.zip › Table S1 Kb peptide.xlsx]

## Sheet: peptide
Peptide	-10lgP	Mass	Length	ppm	m/z	RT	Area AGE-BSA ALT Kb	Area AGE-BSA Kb	Area BSA ALT Kb	Area BSA Kb	Area ALT Kb	Area UT Kb	Fraction	Scan	Source File	#Feature	#Feature AGE-BSA ALT Kb	#Feature AGE-BSA Kb	#Feature BSA ALT Kb	#Feature BSA Kb	#Feature ALT Kb	#Feature UT Kb	Accession	PTM	AScore	Found By
SSEM(+15.99)ARDEDGGQDGDQVGHEDLY	74.11	2524.99	23	-2	842.668	39.67	138.84	178.47		809.99	148.97	1546.6	6	F6:7744	20150812RA rerun MIN6N8_UT Kd pooled.wiff	5	1	1	0	1	1	1	O35417	Oxidation (M)	M4:Oxidation (M):1000.00	PEAKS DB
S(+79.96)HHLAHYRASEEEPEYGEESRSY	73.13	2842.15	23	1.6	711.547	35.41						0	6	F6:7207	20150812RA rerun MIN6N8_UT Kd pooled.wiff	0	0	0	0	0	0	0	P16014	Sulfation	S1:Sulfation:0.00	PEAKS PTM
SHHLAHYRASEEEPEYGEESRSY	73	2762.2	23	-2.7	691.554	35.36		160.03				0	2	F2:6448	20150812RA rerun MIN6N8_AGE-BSA Kd pooled.wiff	1	0	1	0	0	0	0	P16014			PEAKS DB
AYGFRDPGPQL	62.88	1219.6	11	0.5	610.807	54.67	1904.8		790.22		2265.1	2273.6	6	F6:9491	20150812RA rerun MIN6N8_UT Kd pooled.wiff	4	1	0	1	0	1	1	P26339			PEAKS DB
SYNYIRVGAQL	61.36	1282.67	11	0.9	642.339	57.37	406.17	587.39	86.217	423.19	232.84	529.13	1	F1:9531	20150812RA rerun MIN6N8_AGE-BSA ALT Kd pooled.wiff	6	1	1	1	1	1	1	Q5SYD0			PEAKS DB
FYSQPHPNTI	58.39	1202.57	10	1.1	602.294	41.57	3921.3	2337.9	0	7711.2	1595.9	2415.9	4	F4:7293	20150812RA rerun MIN6N8_BSA Kd pooled.wiff	5	1	1	0	1	1	1	O70166			PEAKS DB
PGDSDIIRSMPEQTGEK	58.12	1858.87	17	1.6	620.63	43.39	206.86				24.817		1	F1:7194	20150812RA rerun MIN6N8_AGE-BSA ALT Kd pooled.wiff	2	1	0	0	0	1	0	P62889			PEAKS DB
SHHLAHYRAS(+79.97)EEEPEYGEESRSY	57.41	2842.16	23	0.9	711.548	37.98						0	6	F6:7604	20150812RA rerun MIN6N8_UT Kd pooled.wiff	0	0	0	0	0	0	0	P16014	Phosphorylation (STY)	S10:Phosphorylation (STY):6.63	PEAKS PTM
EVEDPQVAQLELGGGPGAGDLQT	57.38	2279.09	23	-0.7	760.701	65.72	1324			587.11		2540.2	1	F1:11060	20150812RA rerun MIN6N8_AGE-BSA ALT Kd pooled.wiff	3	1	0	0	1	0	1	P01326			PEAKS DB
KYLGINSDGL	57.28	1078.57	10	0.4	540.29	51.82	350.44		123.13	650.7	346.53	675.34	6	F6:8998	20150812RA rerun MIN6N8_UT Kd pooled.wiff	5	1	0	1	1	1	1	P97376			PEAKS DB
SMAEPKTVYWDRDM(+15.99)	55.02	1743.76	14	-1.4	582.26	46.21		25.914				29.634	6	F6:8290	20150812RA rerun MIN6N8_UT Kd pooled.wiff	2	0	1	0	0	0	1	P01887	Oxidation (M)	M14:Oxidation (M):124.72	PEAKS DB
KYLTVKDYL	54.83	1141.64	9	5	571.829	54.9	1051.1	3184.9	609.31	2281.4	1514.7	2100.4	6	F6:9503	20150812RA rerun MIN6N8_UT Kd pooled.wiff	6	1	1	1	1	1	1	Q8CDM1			PEAKS DB
SSEMARDEDGGQDGDQVGHEDLY	54.58	2508.99	23	-2.1	837.337	42.84						369.12	6	F6:7958	20150812RA rerun MIN6N8_UT Kd pooled.wiff	1	0	0	0	0	0	1	O35417			PEAKS DB
KYFENWSASMI	53.75	1374.63	11	2.3	688.323	68.26	2439.3	6267.9		3267.8	3763.4	6588.6	5	F5:12708	20150812RA rerun MIN6N8_Recon ALT Kd pooled.wiff	5	1	1	0	1	1	1	P00405			PEAKS DB
KYLSVQGQL	53.74	1034.58	9	1.2	518.296	47.26	7475.1	3621.9	2704.6	6236.4	2871.9	3692.9	2	F2:7725	20150812RA rerun MIN6N8_AGE-BSA Kd pooled.wiff	6	1	1	1	1	1	1	Q791T5			PEAKS DB
HYLPSYYHL	53.68	1191.57	9	2.6	596.794	52.51	176.19	633.37		509.3	214.84	159.31	6	F6:9084	20150812RA rerun MIN6N8_UT Kd pooled.wiff	5	1	1	0	1	1	1	Q9DAR7			PEAKS DB
LYDPVISKL	53.29	1046.6	9	0.2	524.308	60.53	3025.1	5232.2	2144.1	3000.4	3030.1	4697.9	4	F4:10230	20150812RA rerun MIN6N8_BSA Kd pooled.wiff	6	1	1	1	1	1	1	Q99L90			PEAKS DB
EYIHSKNFI	53.04	1149.58	9	0.1	575.798	43.73	616.07	655.63		807.98	258.37	420.76	4	F4:7440	20150812RA rerun MIN6N8_BSA Kd pooled.wiff	5	1	1	0	1	1	1	Q9JMK2:Q9DC28			PEAKS DB
FYNQVSTPLLR	52.98	1336.71	11	-1.4	669.363	56.37		671.58		398.99	319.22	542.49	6	F6:9775	20150812RA rerun MIN6N8_UT Kd pooled.wiff	4	0	1	0	1	1	1	Q61703			PEAKS DB
PPAENSSAPEAEQGGAE	52.69	1639.7	17	-2.4	820.853	28.14						0	6	F6:5763	20150812RA rerun MIN6N8_UT Kd pooled.wiff	0	0	0	0	0	0	0	P62960			PEAKS DB
SQENPNTYSEDLDV	52.47	1609.67	14	1.3	805.846	53.31	348.42	309.54	84.961	289.9		659.4	6	F6:9204	20150812RA rerun MIN6N8_UT Kd pooled.wiff	5	1	1	1	1	0	1	O35417			PEAKS DB
TYDYAKTIL	52.12	1086.56	9	1.3	544.288	55.34	7784.7	9603.7	6083.2	9579.4	7982.2	12580	4	F4:9268	20150812RA rerun MIN6N8_BSA Kd pooled.wiff	6	1	1	1	1	1	1	Q91V92			PEAKS DB
YYLQIHPQEL	51.68	1302.66	10	-1.3	652.337	62.3	2416.4	4058.3	1462.3	3501.7	2113.7		4	F4:10589	20150812RA rerun MIN6N8_BSA Kd pooled.wiff	5	1	1	1	1	1	0	Q3U1J4			PEAKS DB
SYFPEITHI	51.56	1105.54	9	1.9	553.78	66.02	50096	0	44753	52059	54314	87071	4	F4:11163	20150812RA rerun MIN6N8_BSA Kd pooled.wiff	5	1	0	1	1	1	1	P52332			PEAKS DB
IYVEQKQYI	51.56	1182.63	9	-0.1	592.321	46.78	1789.4	569.75	484.23	0	26.919	728.87	4	F4:7765	20150812RA rerun MIN6N8_BSA Kd pooled.wiff	5	1	1	1	0	1	1	Q62018			PEAKS DB
SMAEPKTVYWDRDM	51.52	1727.76	14	3.2	576.931	52.53		583.94					2	F2:8766	20150812RA rerun MIN6N8_AGE-BSA Kd pooled.wiff	1	0	1	0	0	0	0	P01887			PEAKS DB
SYVDIHTGL	51.3	1003.5	9	-0.3	502.756	52.2	9180.7	12326	4831.9	9899.6	5984.5		4	F4:8607	20150812RA rerun MIN6N8_BSA Kd pooled.wiff	5	1	1	1	1	1	0	Q9DCC4			PEAKS DB
KYLSVQGQLF	50.97	1181.64	10	1.3	591.83	60.73	12168	17558	8420.5	14433	10761	18319	2	F2:10659	20150812RA rerun MIN6N8_AGE-BSA Kd pooled.wiff	6	1	1	1	1	1	1	Q791T5			PEAKS DB
NYGPM(+15.99)KGGSFGGRSSGSP	50.54	1757.78	18	-0.5	586.933	31.68				5.864			4	F4:6099	20150812RA rerun MIN6N8_BSA Kd pooled.wiff	1	0	0	0	1	0	0	Q8BG05	Oxidation (M)	M5:Oxidation (M):1000.00	PEAKS DB
KYIDQKFVL	50.49	1152.65	9	-3.1	577.33	52.19	230.46		184.64	474.53	244.96	71.27	1	F1:8561	20150812RA rerun MIN6N8_AGE-BSA ALT Kd pooled.wiff	5	1	0	1	1	1	1	Q61151:Q60996			PEAKS DB
SYNM(+15.99)VIREDNQTNRL	50.25	1867.88	15	-3.1	623.634	41.81	149.16	97.598		260.92			4	F4:7326	20150812RA rerun MIN6N8_BSA Kd pooled.wiff	3	1	1	0	1	0	0	Q6R0H7	Oxidation (M)	M4:Oxidation (M):1000.00	PEAKS DB
DSDAENPRYEPRAPWM(+15.99)EQEGPEY	50.08	2781.16	23	0.2	928.061	54.94				2765.4			4	F4:9221	20150812RA rerun MIN6N8_BSA Kd pooled.wiff	1	0	0	0	1	0	0	P01899	Oxidation (M)	M16:Oxidation (M):1000.00	PEAKS DB
KYIEGVSDF	49.74	1056.51	9	-1.2	529.263	50.85	1840.1	2528.7	1243.3	3695.9	1555.9	2453.5	5	F5:9553	20150812RA rerun MIN6N8_Recon ALT Kd pooled.wiff	6	1	1	1	1	1	1	P28575			PEAKS DB
YGGGYGSGGGSGGYGSRRF	49.65	1797.78	19	-3.8	600.266	38.91	243.85	694.58		132.58	89.554	86.311	6	F6:7666	20150812RA rerun MIN6N8_UT Kd pooled.wiff	5	1	1	0	1	1	1	Q8BG05			PEAKS DB
TYLPAHIPYQEL	49.45	1443.74	12	-1.9	722.876	64.74	165.91	274.39	24.03	0		253.42	4	F4:11002	20150812RA rerun MIN6N8_BSA Kd pooled.wiff	4	1	1	1	0	0	1	Q2KN98:Q5SXY1			PEAKS DB
CFYADHTGL	49.13	1025.43	9	-1.8	513.72	57.17			89.278	209.64		743.85	6	F6:9915	20150812RA rerun MIN6N8_UT Kd pooled.wiff	3	0	0	1	1	0	1	P11370			PEAKS DB
SSGSPYGGGYGSGGGSGGYGSRRF	49.13	2212.95	24	-5.6	738.654	42.39	413.53	275.25		98.229	117.6		5	F5:8648	20150812RA rerun MIN6N8_Recon ALT Kd pooled.wiff	4	1	1	0	1	1	0	Q8BG05			PEAKS DB
KYITTLEDL	48.99	1094.59	9	0.6	548.301	59.68	1844.9	3483.1	1185.1	2624.3	1929.1	3651	6	F6:10480	20150812RA rerun MIN6N8_UT Kd pooled.wiff	6	1	1	1	1	1	1	Q7TN22			PEAKS DB
LVRSSNNLGPVLPPTNVGSNTYG	48.93	2355.22	23	0.4	786.08	56.77	5866.7	2765.6	1841.8	928.26	2413.3	3126.4	6	F6:9863	20150812RA rerun MIN6N8_UT Kd pooled.wiff	6	1	1	1	1	1	1	P12968			PEAKS DB
LYTHIVTDI	48.79	1073.58	9	3.6	537.797	55.59	1200.9	1011	850.49	1428.1	871.67	1366.1	2	F2:9377	20150812RA rerun MIN6N8_AGE-BSA Kd pooled.wiff	6	1	1	1	1	1	1	Q80UZ2			PEAKS DB
DYQALRTSI	48.63	1065.55	9	1.7	533.781	49.84	11382	10076	3605.9	7135.8	3933.9	4186	6	F6:8749	20150812RA rerun MIN6N8_UT Kd pooled.wiff	6	1	1	1	1	1	1	Q68FD5			PEAKS DB
QYNPVKQQL	48.53	1116.59	9	0.2	559.302	40.01	1044.5		0				1	F1:6945	20150812RA rerun MIN6N8_AGE-BSA ALT Kd pooled.wiff	1	1	0	0	0	0	0	Q9DBL7			PEAKS DB
GYVDNKEFV	48.33	1069.51	9	-1.4	535.76	45.53	1257.1	957.63	0	1167.1	563.03	990.11	6	F6:8169	20150812RA rerun MIN6N8_UT Kd pooled.wiff	5	1	1	0	1	1	1	P01899			PEAKS DB
YGFRDPGPQL	48.31	1148.56	10	2.2	575.287	52.77	705.46	541.02	186.99		0	1404.3	3	F3:9135	20150812RA rerun MIN6N8_BSA ALT Kd pooled.wiff	4	1	1	1	0	0	1	P26339			PEAKS DB
SYNLTVREL	48.17	1093.58	9	0.2	547.796	54.52	2533.5	4609.9		4112	2602.7		2	F2:9216	20150812RA rerun MIN6N8_AGE-BSA Kd pooled.wiff	4	1	1	0	1	1	0	Q9ESE1			PEAKS DB
SYGELLHSL	48.06	1017.51	9	2.2	509.765	62.71	6053.9	8679.7	3701.3	3396.7	4672.4	7115.4	6	F6:11274	20150812RA rerun MIN6N8_UT Kd pooled.wiff	6	1	1	1	1	1	1	P24529			PEAKS DB
TYLPAGQSV	47.52	934.476	9	-1.1	468.245	46.18	452.31	255.24		257.15	121.25	282.6	4	F4:7688	20150812RA rerun MIN6N8_BSA Kd pooled.wiff	5	1	1	0	1	1	1	P67778			PEAKS DB
TNEIVEEQYTPQS	46.88	1536.69	13	2.6	769.354	45.6	465.65	209.62			84.852	337.73	1	F1:7402	20150812RA rerun MIN6N8_AGE-BSA ALT Kd pooled.wiff	4	1	1	0	0	1	1	Q03517			PEAKS DB
DYQDVRNEI	46.61	1150.53	9	-1.6	576.269	46	401.15	233.62			237.1	218.08	5	F5:8885	20150812RA rerun MIN6N8_Recon ALT Kd pooled.wiff	4	1	1	0	0	1	1	G5E829			PEAKS DB
SFLETVNQL	46.48	1049.54	9	-2	525.776	69.22	4126.4	7916	3466.5	3707	3437.6	6141.5	4	F4:11698	20150812RA rerun MIN6N8_BSA Kd pooled.wiff	6	1	1	1	1	1	1	Q9EP52			PEAKS DB
HYEITKQDI	46.31	1145.57	9	0	573.793	38.13	23.411			142.29			4	F4:7071	20150812RA rerun MIN6N8_BSA Kd pooled.wiff	2	1	0	0	1	0	0	Q62245			PEAKS DB
QVTQPTVGM(+15.99)NFKTPRGAV	46.07	1946	18	0	649.675	44.99	690.77	750.9		950.52	482.14		4	F4:7527	20150812RA rerun MIN6N8_BSA Kd pooled.wiff	4	1	1	0	1	1	0	P63276	Oxidation (M)	M9:Oxidation (M):1000.00	PEAKS DB
TYSPPLNKL	46.03	1031.57	9	-12.1	516.784	50.01	0	0	1135.1	4025.2	0	1279.9	6	F6:8752	20150812RA rerun MIN6N8_UT Kd pooled.wiff	4	0	0	1	1	0	2	P02340			PEAKS DB
SYLENPTSYHL	46.02	1322.61	11	0.7	662.312	58.65	655.52		10.563	782.3	558.35	1182.9	3	F3:9592	20150812RA rerun MIN6N8_BSA ALT Kd pooled.wiff	5	1	0	1	1	1	1	Q9R210			PEAKS DB
YYGILQEKI	45.76	1125.61	9	-3.5	563.809	60.36	805.32	1484	642.23	1251.3	880.14	1785.4	4	F4:10207	20150812RA rerun MIN6N8_BSA Kd pooled.wiff	6	1	1	1	1	1	1	P97858			PEAKS DB
SYSPIPEGI	45.63	961.476	9	0.8	481.745	60.56	268.05	566.88		321.89	351.75	652.95	2	F2:10623	20150812RA rerun MIN6N8_AGE-BSA Kd pooled.wiff	5	1	1	0	1	1	1	Q52KR3			PEAKS DB
YYDLVRTEI	44.87	1170.59	9	0.1	586.303	58.59	1689.9	3696	885.99	2052.3	1405.6	3057.7	4	F4:9846	20150812RA rerun MIN6N8_BSA Kd pooled.wiff	6	1	1	1	1	1	1	Q02384			PEAKS DB
GYVQGINDL	44.64	977.482	9	-0.2	489.748	57.17	640.08		270.45	758.69	583.13	853.4	6	F6:9905	20150812RA rerun MIN6N8_UT Kd pooled.wiff	5	1	0	1	1	1	1	Q8R5A6			PEAKS DB
SYGDLKNAI	44.57	979.497	9	0.3	490.754	46.79	1793.2	572.8	518.78	0	0	707.98	1	F1:7551	20150812RA rerun MIN6N8_AGE-BSA ALT Kd pooled.wiff	4	1	1	1	0	0	1	O35326			PEAKS DB
IPVGSLKNEDTPN	44.5	1382.7	13	-7.3	692.354	38.23	21.068					36.746	6	F6:7629	20150812RA rerun MIN6N8_UT Kd pooled.wiff	2	1	0	0	0	0	1	Q03517			PEAKS DB
KYIEIYVQKV	44.26	1281.73	10	-1.6	641.873	50.8		62.154		61.776		138.37	6	F6:8873	20150812RA rerun MIN6N8_UT Kd pooled.wiff	3	0	1	0	1	0	1	Q68FD5			PEAKS DB
NYQEALRYI	44.12	1168.59	9	-8.5	585.296	59.79	1104.1	2699.1	777.35	1425.9	1226.5	2575	4	F4:10354	20150812RA rerun MIN6N8_BSA Kd pooled.wiff	6	1	1	1	1	1	1	Q91W86			PEAKS DB
GYLELLDHV	44.03	1057.54	9	-1.1	529.779	73.39	208.48	541.77	74.177	233.35		368.09	4	F4:12029	20150812RA rerun MIN6N8_BSA Kd pooled.wiff	5	1	1	1	1	0	1	P26039			PEAKS DB
VYESLISHI	43.9	1059.56	9	1.9	530.788	60.98	1254.1	2780.9	1211.4	1231.3	1351.9	2115.4	5	F5:11200	20150812RA rerun MIN6N8_Recon ALT Kd pooled.wiff	6	1	1	1	1	1	1	Q61037			PEAKS DB
EYIKVITGL	43.67	1034.6	9	1.6	518.309	61.88	2375.7	2228.3	1612.1	2282.5	1855.4	2476.6	2	F2:10954	20150812RA rerun MIN6N8_AGE-BSA Kd pooled.wiff	6	1	1	1	1	1	1	Q6A070			PEAKS DB
SYVAIINKSI	43.5	1106.63	10	-3.2	554.322	57.27	255.53	472.21	0	296.17	190.86	440.33	4	F4:9649	20150812RA rerun MIN6N8_BSA Kd pooled.wiff	5	1	1	0	1	1	1	P39054			PEAKS DB
SYNRLKSLI	43.47	1092.63	9	0	547.322	48.89	2816.6	5052.4	1648.1	0	2227.2	4945.4	6	F6:8584	20150812RA rerun MIN6N8_UT Kd pooled.wiff	5	1	1	1	0	1	1	Q920E5			PEAKS DB
TNEIVEEQYTPQSL	43.25	1649.78	14	0.8	825.893	58.58	1146.9		5.5373	204.97		407.06	3	F3:9587	20150812RA rerun MIN6N8_BSA ALT Kd pooled.wiff	4	1	0	1	1	0	1	Q03517			PEAKS DB
DYLGSRQYV	43.24	1099.53	9	-1.7	550.769	47.14	287.06		0		70.327	124.48	1	F1:7571	20150812RA rerun MIN6N8_AGE-BSA ALT Kd pooled.wiff	3	1	0	0	0	1	1	P52332			PEAKS DB
NYVNGKTFL	43.24	1054.54	9	4.3	528.282	51.47	999.52	1529	845.37	1727	1000.4	1999.6	5	F5:9612	20150812RA rerun MIN6N8_Recon ALT Kd pooled.wiff	6	1	1	1	1	1	1	P49722			PEAKS DB
SYAVSVNHV	43.08	974.482	9	0.6	488.249	39.99	170.1			106.63			4	F4:7181	20150812RA rerun MIN6N8_BSA Kd pooled.wiff	2	1	0	0	1	0	0	Q8K387			PEAKS DB
EVEDPQVAQLELGGGPGAGDL	42.85	2049.99	21	-0.3	684.333	69.44	154.49					559.16	1	F1:11680	20150812RA rerun MIN6N8_AGE-BSA ALT Kd pooled.wiff	2	1	0	0	0	0	1	P01326			PEAKS DB
NFLESLSGL	42.83	978.502	9	-1.5	490.258	82.96		273.01		200.14		0	4	F4:12803	20150812RA rerun MIN6N8_BSA Kd pooled.wiff	2	0	1	0	1	0	0	Q80TM9			PEAKS DB
IYFPSVTGI	42.67	995.533	9	1.1	498.772	75.57	275.04			255.54	160.99	420.19	1	F1:12156	20150812RA rerun MIN6N8_AGE-BSA ALT Kd pooled.wiff	4	1	0	0	1	1	1	Q9WVL3:Q91V14			PEAKS DB
GYMPM(+15.99)TPGAAL	42.46	1123.5	11	0.6	562.76	56.77	610.68	1673.7		1341.3	1361.6	1418.6	6	F6:9855	20150812RA rerun MIN6N8_UT Kd pooled.wiff	5	1	1	0	1	1	1	P81122	Oxidation (M)	M5:Oxidation (M):14.04	PEAKS DB
AYLLNLNHL	42.43	1069.59	9	-2.1	535.802	68.38	844.86	1919.4	579.33	802.05	726.07	1661.1	2	F2:12329	20150812RA rerun MIN6N8_AGE-BSA Kd pooled.wiff	6	1	1	1	1	1	1	Q91V04			PEAKS DB
TFINLMTHI	42.36	1088.57	9	-0.1	545.29	74.17	1045.9	1959.3	31.562	824.31	438.22	2517	1	F1:12086	20150812RA rerun MIN6N8_AGE-BSA ALT Kd pooled.wiff	6	1	1	1	1	1	1	Q8BVE3			PEAKS DB
SYLHSLQEV	42.19	1074.53	9	-3	538.273	51.06		58.397		162.15		10.665	2	F2:8437	20150812RA rerun MIN6N8_AGE-BSA Kd pooled.wiff	3	0	1	0	1	0	1	Q5SSZ5			PEAKS DB
AYSIVIRQI	42.16	1061.62	9	0.4	531.817	58.19	743.61	1312	331.73	815.08	671.83	1372.4	3	F3:9556	20150812RA rerun MIN6N8_BSA ALT Kd pooled.wiff	6	1	1	1	1	1	1	Q80TP3			PEAKS DB
AYLVDIKTI	42.12	1034.6	9	2.1	518.309	62.7			527.48	787.02	619.43		5	F5:11588	20150812RA rerun MIN6N8_Recon ALT Kd pooled.wiff	3	0	0	1	1	1	0	Q6VH22			PEAKS DB
TYQAMVHEL	41.97	1090.51	9	4.6	546.266	51.58	402.79	1145.7	124.05	906.52	613.97	1600.6	5	F5:9623	20150812RA rerun MIN6N8_Recon ALT Kd pooled.wiff	6	1	1	1	1	1	1	P97390			PEAKS DB
SYVESLRTL	41.78	1066.57	9	-3	534.289	54.73	1993.2		1077.4	3331.2	2197.9	2824.7	6	F6:9494	20150812RA rerun MIN6N8_UT Kd pooled.wiff	5	1	0	1	1	1	1	Q80U35			PEAKS DB
SYSEVKSDL	41.74	1026.49	9	3.1	514.25	37.95	39.743						1	F1:6821	20150812RA rerun MIN6N8_AGE-BSA ALT Kd pooled.wiff	1	1	0	0	0	0	0	O35245			PEAKS DB
TYKALNTFI	41.71	1069.58	9	-0.6	535.797	59.76	415.52	972.25	431.2				2	F2:10434	20150812RA rerun MIN6N8_AGE-BSA Kd pooled.wiff	3	1	1	1	0	0	0	Q8VBZ3			PEAKS DB
HYIPVKTDL	41.53	1084.59	9	0.3	543.301	41.67	98.266	72.643		93.931		56.529	1	F1:7063	20150812RA rerun MIN6N8_AGE-BSA ALT Kd pooled.wiff	4	1	1	0	1	0	1	Q8BYB9			PEAKS DB
VYAPLKELL	41.43	1044.62	9	-0.4	523.318	68.66	1494	4313.8	1411.9	2151.6	2073.8	4351.7	5	F5:12801	20150812RA rerun MIN6N8_Recon ALT Kd pooled.wiff	6	1	1	1	1	1	1	Q9D0F1			PEAKS DB
YLNQEQAEQGREHL	41.39	1713.81	14	-1.8	572.275	37.82	34.836					0	6	F6:7590	20150812RA rerun MIN6N8_UT Kd pooled.wiff	1	1	0	0	0	0	0	Q03517			PEAKS DB
EVEDPQVAQLELGGGPGAGDLQ	41.39	2178.04	22	3.1	727.021	65.32	685.58						1	F1:11025	20150812RA rerun MIN6N8_AGE-BSA ALT Kd pooled.wiff	1	1	0	0	0	0	0	P01326			PEAKS DB
KYSGVLSSI	41.2	952.523	9	1.1	477.269	53.33	1819.7	2389.1	993	2993.6		3307.7	2	F2:8877	20150812RA rerun MIN6N8_AGE-BSA Kd pooled.wiff	5	1	1	1	1	0	1	Q791T5			PEAKS DB
NYFPSKQDI	41.16	1110.53	9	-2.4	556.273	47.82	1528.6	1254		1380	757.41	975.68	6	F6:8458	20150812RA rerun MIN6N8_UT Kd pooled.wiff	5	1	1	0	1	1	1	P27600			PEAKS DB
KYKDIYTEL	40.87	1171.61	9	0	586.813	47.39	2206.7	2257.5	989.55	2824.2	1977.9	3125.2	4	F4:7812	20150812RA rerun MIN6N8_BSA Kd pooled.wiff	6	1	1	1	1	1	1	P97434			PEAKS DB
GYLAQLSHNV	40.86	1100.56	10	1.2	551.286	54.12	535.97		159.27	392.65	364.85	469.9	3	F3:9242	20150812RA rerun MIN6N8_BSA ALT Kd pooled.wiff	5	1	0	1	1	1	1	Q3USZ8			PEAKS DB
SYEILLHEV	40.67	1101.57	9	0.8	551.791	63.94	259.02	545.18	168.99	206.4			1	F1:10799	20150812RA rerun MIN6N8_AGE-BSA ALT Kd pooled.wiff	4	1	1	1	1	0	0	Q6S5J6			PEAKS DB
RYLPPATQV	40.44	1043.58	9	-1.5	522.795	40.58	390.81	0		609.58			4	F4:7213	20150812RA rerun MIN6N8_BSA Kd pooled.wiff	2	1	0	0	1	0	0	Q91VC3			PEAKS DB
GYM(+15.99)PMTPGAAL	40.21	1123.5	11	-0.6	562.759	55.54		497.22			635.6	822.44	2	F2:9383	20150812RA rerun MIN6N8_AGE-BSA Kd pooled.wiff	3	0	1	0	0	1	1	P81122	Oxidation (M)	M3:Oxidation (M):32.28	PEAKS DB
TWNKLLTTI	40.16	1088.62	9	-1.9	545.318	67.67	1682.2	4402.3	1127.3	1589		3287.6	4	F4:11434	20150812RA rerun MIN6N8_BSA Kd pooled.wiff	5	1	1	1	1	0	1	Q9D4H8			PEAKS DB
EYLQNLNHI	40.14	1142.57	9	2.3	572.292	53.62	909.85	1798	295.21	1309.7	813.32	1648.1	1	F1:8831	20150812RA rerun MIN6N8_AGE-BSA ALT Kd pooled.wiff	6	1	1	1	1	1	1	Q45VK7			PEAKS DB
AYAPSGNYV	40.12	940.429	9	-2.6	471.221	43.17	340.82	232.77		148.23	125.24	247.51	4	F4:7398	20150812RA rerun MIN6N8_BSA Kd pooled.wiff	5	1	1	0	1	1	1	P62874:P29387			PEAKS DB
NYDDIRTEL	40.01	1137.53	9	-5.6	569.769	51.65	213.79	271.59				92.585	6	F6:8976	20150812RA rerun MIN6N8_UT Kd pooled.wiff	3	1	1	0	0	0	1	Q3UMY5			PEAKS DB
GYLPNKQVL	39.98	1030.58	9	2	516.297	48.67	15068	12761	4948	14396	7299.7	9148.4	1	F1:7864	20150812RA rerun MIN6N8_AGE-BSA ALT Kd pooled.wiff	6	1	1	1	1	1	1	Q05915			PEAKS DB
AYNRILDAL	39.9	1047.57	9	0.8	524.793	62.48	533.09	1451.4	370.43	501.35	509.15	1119.5	6	F6:11228	20150812RA rerun MIN6N8_UT Kd pooled.wiff	6	1	1	1	1	1	1	Q68FD7			PEAKS DB
SYLPPGTSL	39.85	933.481	9	8.8	467.75	56.57	1444.6	1768.4	0	1058.7		761.16	3	F3:9431	20150812RA rerun MIN6N8_BSA ALT Kd pooled.wiff	4	1	1	0	1	0	1	Q8VCF0			PEAKS DB
SYLVSKQELL	39.85	1178.65	10	1.2	590.333	55.77	378.15		143.72				1	F1:9258	20150812RA rerun MIN6N8_AGE-BSA ALT Kd pooled.wiff	2	1	0	1	0	0	0	Q3UM18			PEAKS DB
TFINLM(+15.99)THI	39.72	1104.56	9	1.9	553.288	61.94	990.27	3270.9	858.88			1308.8	3	F3:9965	20150812RA rerun MIN6N8_BSA ALT Kd pooled.wiff	4	1	1	1	0	0	1	Q8BVE3	Oxidation (M)	M6:Oxidation (M):1000.00	PEAKS DB
GYERIYNEI	39.71	1155.56	9	-0.9	578.785	52.21	70.346	4107.9	1036.6	3084.3	0		4	F4:8632	20150812RA rerun MIN6N8_BSA Kd pooled.wiff	4	1	1	1	1	0	0	Q61823			PEAKS DB
SYNMVIREDNQTNRL	39.68	1851.89	15	-2.9	618.302	47.81				0		90.231	4	F4:7894	20150812RA rerun MIN6N8_BSA Kd pooled.wiff	1	0	0	0	0	0	1	Q6R0H7			PEAKS DB
NYLDIKGLL	39.53	1047.6	9	-0.6	524.805	72.51	1346.7	2769.6	1054.4	1410.3	1125.5	2304.1	2	F2:12970	20150812RA rerun MIN6N8_AGE-BSA Kd pooled.wiff	6	1	1	1	1	1	1	Q9WTX5			PEAKS DB
QYLKILTGL	39.22	1047.63	9	4.9	524.826	69.97	3559.4	7092.8		3036.1	2068.7	8606.4	6	F6:12901	20150812RA rerun MIN6N8_UT Kd pooled.wiff	5	1	1	0	1	1	1	Q3U0D9			PEAKS DB
YYSPTKNEI	38.96	1113.53	9	4.7	557.777	39.68	4468.1		0	0	516.86	0	6	F6:7751	20150812RA rerun MIN6N8_UT Kd pooled.wiff	2	1	0	0	0	1	0	Q4PZA2			PEAKS DB
TYSPSRVLI	38.93	1034.58	9	-0.1	518.293	50.69	528.27		433.93		641.6	1221.7	3	F3:8951	20150812RA rerun MIN6N8_BSA ALT Kd pooled.wiff	4	1	0	1	0	1	1	Q91XU0			PEAKS DB
DYLADKSYI	38.61	1086.52	9	1.7	544.27	53.21	2905.4	4817.6	996.24		2062.6	1956	2	F2:8838	20150812RA rerun MIN6N8_AGE-BSA Kd pooled.wiff	5	1	1	1	0	1	1	O70251			PEAKS DB
YYINGKTGL	38.5	1027.53	9	-1	514.774	46.06	1283.8	1395.9	100.26	1236.2	597.38	858.71	4	F4:7668	20150812RA rerun MIN6N8_BSA Kd pooled.wiff	6	1	1	1	1	1	1	Q6ZQ93			PEAKS DB
SYANVKQWL	38.43	1107.57	9	1.5	554.791	60.75	372.21	509.25	218.03	337.59		821.82	3	F3:9850	20150812RA rerun MIN6N8_BSA ALT Kd pooled.wiff	5	1	1	1	1	0	1	Q9D1G1			PEAKS DB
YYLNDLERI	38.38	1197.6	9	2.2	599.808	64.35	2464.7	5928.5	1768.6	2119.1	2223	3135.9	1	F1:10852	20150812RA rerun MIN6N8_AGE-BSA ALT Kd pooled.wiff	6	1	1	1	1	1	1	P08752:O70443			PEAKS DB
IYKGVIQAI	38.33	1003.61	9	1.2	502.811	53.48	1987.7	1837.3	729.85	2127.2	1694.3	2602.2	6	F6:9238	20150812RA rerun MIN6N8_UT Kd pooled.wiff	6	1	1	1	1	1	1	Q99P72			PEAKS DB
LYQEVFGRL	38.23	1123.6	9	0.4	562.807	63.6	324.26	895.04	272.95	273.42			1	F1:10720	20150812RA rerun MIN6N8_AGE-BSA ALT Kd pooled.wiff	4	1	1	1	1	0	0	Q61985			PEAKS DB
SYYINGKTGL	38.21	1114.57	10	1.9	558.291	47.62	166.66			215.21	53.493	98.442	5	F5:9053	20150812RA rerun MIN6N8_Recon ALT Kd pooled.wiff	4	1	0	0	1	1	1	Q6ZQ93			PEAKS DB
KYSSLYENL	38.04	1115.55	9	2.7	558.784	52.42	502.58	508.62			220.58	454.21	2	F2:8693	20150812RA rerun MIN6N8_AGE-BSA Kd pooled.wiff	4	1	1	0	0	1	1	Q8K4E0			PEAKS DB
YVDIHTGL	38.04	916.465	8	-1.1	459.24	52.09				152.99			4	F4:8617	20150812RA rerun MIN6N8_BSA Kd pooled.wiff	1	0	0	0	1	0	0	Q9DCC4			PEAKS DB
IYMEIIHNL	38.02	1144.6	9	-2.4	573.303	69.5		542.98				469.94	6	F6:12798	20150812RA rerun MIN6N8_UT Kd pooled.wiff	2	0	1	0	0	0	1	Q9DC23			PEAKS DB
FPEITHI	37.93	855.449	7	-3.5	428.73	65.91	1383.4			1574.7	1633.5	2720.7	6	F6:12113	20150812RA rerun MIN6N8_UT Kd pooled.wiff	4	1	0	0	1	1	1	P52332			PEAKS DB
SYSITVKEL	37.85	1038.56	9	0.8	520.288	53.81	4875.4	6734.6	2627.5	6271.9	4606.7	7616.6	5	F5:9999	20150812RA rerun MIN6N8_Recon ALT Kd pooled.wiff	6	1	1	1	1	1	1	Q9EPN1			PEAKS DB
SYNPVTHQL	37.8	1057.52	9	-2	529.766	41.52	306.94	193.78		446.12	93.532	171.23	6	F6:7892	20150812RA rerun MIN6N8_UT Kd pooled.wiff	5	1	1	0	1	1	1	Q6NWV3			PEAKS DB
SAPRNFVENF	37.76	1179.57	10	-4.5	590.788	55.45			30.032	209.35			4	F4:9257	20150812RA rerun MIN6N8_BSA Kd pooled.wiff	2	0	0	1	1	0	0	Q91WG4			PEAKS DB
IQKTPQIQVYS	37.68	1303.71	11	0.1	652.864	43.85	184.41			85.996		27.311	4	F4:7453	20150812RA rerun MIN6N8_BSA Kd pooled.wiff	3	1	0	0	1	0	1	P01887			PEAKS DB
KYIHSANVL	37.55	1043.58	9	1.7	522.794	34.89	48.736	84.179		64.526	22.677	36.302	1	F1:6466	20150812RA rerun MIN6N8_AGE-BSA ALT Kd pooled.wiff	5	1	1	0	1	1	1	Q61532:P63085:Q63844:Q6P5G0			PEAKS DB
AYQSLGGPFPKV	37.36	1262.67	12	-2.8	632.338	58.05		123.5		0			2	F2:9961	20150812RA rerun MIN6N8_AGE-BSA Kd pooled.wiff	1	0	1	0	0	0	0	Q0VGU4			PEAKS DB
TFASTLSHL	37.12	975.503	9	2.1	488.757	60.52			95.237		61.809	174.91	3	F3:9819	20150812RA rerun MIN6N8_BSA ALT Kd pooled.wiff	3	0	0	1	0	1	1	Q8CFI7			PEAKS DB
EYLEGRNLI	37.08	1105.58	9	3.7	553.798	53.9		749.5	155.6			798.46	2	F2:9043	20150812RA rerun MIN6N8_AGE-BSA Kd pooled.wiff	3	0	1	1	0	0	1	Q91Z67			PEAKS DB
SFARAPQLDL	37.08	1116.59	10	1.3	559.304	57.82	539.4	565.3	198.03	357.8	543.98	3654.8	2	F2:9938	20150812RA rerun MIN6N8_AGE-BSA Kd pooled.wiff	6	1	1	1	1	1	1	P16014			PEAKS DB
SFGVTLHEL	37.04	1001.52	9	-0.1	501.766	61.45		875.14	493.66			1037.4	6	F6:10952	20150812RA rerun MIN6N8_UT Kd pooled.wiff	3	0	1	1	0	0	1	P52332			PEAKS DB
NYLPAINGI	36.92	973.523	9	1.3	487.767	68.6			1822.5		2116.9		3	F3:10673	20150812RA rerun MIN6N8_BSA ALT Kd pooled.wiff	2	0	0	1	0	1	0	P36536:Q9CQC9			PEAKS DB
VYSQIPAAVKL	36.72	1187.69	11	-0.4	594.853	57.63		109.92		146.22		216.85	6	F6:10037	20150812RA rerun MIN6N8_UT Kd pooled.wiff	3	0	1	0	1	0	1	Q80TP3			PEAKS DB
YYFEVVQKL	36.66	1187.62	9	2.9	594.82	66.71	143.39	236.51			145.61		2	F2:12055	20150812RA rerun MIN6N8_AGE-BSA Kd pooled.wiff	3	1	1	0	0	1	0	Q8BT60			PEAKS DB
SYNYLIRYL	36.6	1203.63	9	-2.3	602.82	73.46	90.521	280.5		147.94		214.2	6	F6:13299	20150812RA rerun MIN6N8_UT Kd pooled.wiff	4	1	1	0	1	0	1	Q91WQ5			PEAKS DB
GYYAMVGQV	36.59	986.453	9	-1.4	494.233	58.14		0				142.62	6	F6:10163	20150812RA rerun MIN6N8_UT Kd pooled.wiff	1	0	0	0	0	0	1	Q8K2C8			PEAKS DB
SYYGPLNLL	36.55	1038.54	9	-2.3	520.275	81.67						925.57	6	F6:14391	20150812RA rerun MIN6N8_UT Kd pooled.wiff	1	0	0	0	0	0	1	O09005			PEAKS DB
SYYPTSSTSSV	36.46	1177.51	11	1.4	589.765	42.73	84.877			58.824		52.561	6	F6:7954	20150812RA rerun MIN6N8_UT Kd pooled.wiff	3	1	0	0	1	0	1	O08579			PEAKS DB
SYQKLYNEL	36.44	1156.58	9	-12.4	579.288	52.09		0	0	0	1106.1		5	F5:9662	20150812RA rerun MIN6N8_Recon ALT Kd pooled.wiff	1	0	0	0	0	1	0	A2AM05			PEAKS DB
KYNPIGESVL	36.1	1118.6	10	1	560.306	52.67	1713.2		911.08	2144.1	1588.3	2301.5	4	F4:8703	20150812RA rerun MIN6N8_BSA Kd pooled.wiff	5	1	0	1	1	1	1	Q9DBT5			PEAKS DB
KYVPLVTGL	36.07	988.596	9	-0.1	495.303	59.16	1066.2		627.76	824.07	934.92		3	F3:9633	20150812RA rerun MIN6N8_BSA ALT Kd pooled.wiff	4	1	0	1	1	1	0	Q8BMI0			PEAKS DB
KYGVVLDEI	35.83	1034.56	9	1.9	518.291	58.99	18944	27774	11313	23079	17929	32053	4	F4:9920	20150812RA rerun MIN6N8_BSA Kd pooled.wiff	6	1	1	1	1	1	1	O89079			PEAKS DB
SYWLVRTEL	35.82	1165.61	9	-0.4	583.811	67.63	654.7	1605	378.68	520.3	595.57	1232.6	3	F3:10602	20150812RA rerun MIN6N8_BSA ALT Kd pooled.wiff	6	1	1	1	1	1	1	P42859			PEAKS DB
SYSSLIRNL	35.81	1051.57	9	5.1	526.791	60.69	709.4		459.64		618.4		3	F3:9829	20150812RA rerun MIN6N8_BSA ALT Kd pooled.wiff	3	1	0	1	0	1	0	Q64324			PEAKS DB
SYLPVGSHNL	35.77	1085.55	10	0.5	543.783	50.56	6991.8	8475.9	2935.7	8900.7	4338.5	6651	4	F4:8396	20150812RA rerun MIN6N8_BSA Kd pooled.wiff	6	1	1	1	1	1	1	Q9WVF7			PEAKS DB
YYIHGPKGNEI	35.74	1289.64	11	-2.2	645.826	42.08		128.95		211.02		92.584	4	F4:7322	20150812RA rerun MIN6N8_BSA Kd pooled.wiff	3	0	1	0	1	0	1	Q6P5D8			PEAKS DB
QYQSLLRSL	35.73	1106.61	9	2.7	554.313	61.68	2940.9	5366	2314.1	2279.8	2608.9	4668.7	6	F6:11004	20150812RA rerun MIN6N8_UT Kd pooled.wiff	6	1	1	1	1	1	1	Q91ZU6			PEAKS DB
TYFFGATHV	35.66	1041.49	9	-0.8	521.753	58.27		186.37				199.11	2	F2:10042	20150812RA rerun MIN6N8_AGE-BSA Kd pooled.wiff	2	0	1	0	0	0	1	Q7TT23			PEAKS DB
SYSMPLTSI	35.42	997.479	9	-0.6	499.747	66.33		0				0	2	F2:11974	20150812RA rerun MIN6N8_AGE-BSA Kd pooled.wiff	0	0	0	0	0	0	0	Q6PDX6			PEAKS DB
APQGSLGEYLFERLTLKHD	35.4	2173.12	19	-1.3	544.286	76	88.073	272.38		168.35		245.97	2	F2:13421	20150812RA rerun MIN6N8_AGE-BSA Kd pooled.wiff	4	1	1	0	1	0	1	P29391			PEAKS DB
SYVEMQRTAI	35.38	1196.59	10	3.4	599.302	46.52	47.728			32.573			4	F4:7738	20150812RA rerun MIN6N8_BSA Kd pooled.wiff	2	1	0	0	1	0	0	Q6P9R4			PEAKS DB
AFLSSLTDV	35.31	951.491	9	2.6	476.752	72	177.87	327.62	96.28			151.99	1	F1:11926	20150812RA rerun MIN6N8_AGE-BSA ALT Kd pooled.wiff	4	1	1	1	0	0	1	Q3UVL4			PEAKS DB
AYAPAIHQI	35.19	982.524	9	5.8	492.27	45.43	232.52			141.24		155.54	1	F1:7366	20150812RA rerun MIN6N8_AGE-BSA ALT Kd pooled.wiff	3	1	0	0	1	0	1	E9Q7E2			PEAKS DB
YYSALRHYI	35.08	1184.6	9	-1.9	593.305	50.79		125.06		116.22		167.14	4	F4:8398	20150812RA rerun MIN6N8_BSA Kd pooled.wiff	3	0	1	0	1	0	1	P57774			PEAKS DB
IYSEMIHNL	35.04	1118.54	9	-0.6	560.278	57.1		1491.8		929.01		1414.4	4	F4:9621	20150812RA rerun MIN6N8_BSA Kd pooled.wiff	3	0	1	0	1	0	1	Q6NS59			PEAKS DB
VEDPQVAQLELGGGPGAGDLQ	34.95	2049	21	-1.7	684.007	64.31						241.46	6	F6:11699	20150812RA rerun MIN6N8_UT Kd pooled.wiff	1	0	0	0	0	0	1	P01326			PEAKS DB
AYISQVPTQM(+15.99)	34.9	1152.55	10	-5.1	577.279	42.39	167.99	115.63		181.15	51.732	78.084	5	F5:8644	20150812RA rerun MIN6N8_Recon ALT Kd pooled.wiff	5	1	1	0	1	1	1	Q9JLV2	Oxidation (M)	M10:Oxidation (M):1000.00	PEAKS DB
KDYQPGITYI	34.83	1196.61	10	-0.7	599.311	53.36	312.71	463.23		457.66		615.07	6	F6:9211	20150812RA rerun MIN6N8_UT Kd pooled.wiff	4	1	1	0	1	0	1	Q8CJG1:Q8CJF9			PEAKS DB
SYLVSKQEL	34.8	1065.57	9	1	533.793	46.02	194.41	188.49			66.615	131.4	2	F2:7579	20150812RA rerun MIN6N8_AGE-BSA Kd pooled.wiff	4	1	1	0	0	1	1	Q3UM18			PEAKS DB
SLQVLLTTV	34.77	972.586	9	4.5	487.3	74.69	125.05	182.28		110.3			1	F1:12114	20150812RA rerun MIN6N8_AGE-BSA ALT Kd pooled.wiff	3	1	1	0	1	0	0	Q9DA39			PEAKS DB
KYVAVYNLI	34.76	1081.62	9	0	541.816	64.85	1420.5	3340.5	1059.6		1185.9	2485.8	2	F2:11660	20150812RA rerun MIN6N8_AGE-BSA Kd pooled.wiff	5	1	1	1	0	1	1	Q80U87			PEAKS DB
SSNNLGPVLPPTNVGSNTYG	34.74	1986.96	20	2.4	994.488	59.26	13692	6127.2	4022.6		7116.4	5149.2	1	F1:9979	20150812RA rerun MIN6N8_AGE-BSA ALT Kd pooled.wiff	5	1	1	1	0	1	1	P12968			PEAKS DB
AYVPGFAHI	34.72	973.502	9	1.6	487.759	59.08	24530	30645	15248	29236	20683	40153	2	F2:10287	20150812RA rerun MIN6N8_AGE-BSA Kd pooled.wiff	6	1	1	1	1	1	1	Q9CXX9			PEAKS DB
RYLQLTQSEL	34.7	1249.67	10	-0.8	625.84	54.87	495.9	929.05	286.72	762.49	484.46	1046.1	2	F2:9284	20150812RA rerun MIN6N8_AGE-BSA Kd pooled.wiff	6	1	1	1	1	1	1	Q810A3			PEAKS DB
SFLSTVTSV	34.69	939.491	9	1.8	470.752	70.19	970.62	1217.5	529.48				3	F3:10840	20150812RA rerun MIN6N8_BSA ALT Kd pooled.wiff	3	1	1	1	0	0	0	Q3UHU5			PEAKS DB
KYVYVVTEL	34.6	1112.61	9	1.5	557.312	59.03	4521.6	6156.6	2403.9	4382.9	3558.3	6471.9	1	F1:9847	20150812RA rerun MIN6N8_AGE-BSA ALT Kd pooled.wiff	6	1	1	1	1	1	1	P18654			PEAKS DB
SYYTVAHAI	34.5	1023.5	9	5.4	512.761	48.79	1014.5	686.9	249.18	1110.1	470.4	703.99	2	F2:7931	20150812RA rerun MIN6N8_AGE-BSA Kd pooled.wiff	6	1	1	1	1	1	1	Q6DIC0			PEAKS DB
QYVSAFSKL	34.5	1041.55	9	1.3	521.781	55.54	460.43		291.55	835.38	486.14	897.6	1	F1:9182	20150812RA rerun MIN6N8_AGE-BSA ALT Kd pooled.wiff	5	1	0	1	1	1	1	Q99JB2			PEAKS DB
PQVAQLELGGGPGAGDLQT	34.46	1806.91	19	1.1	904.464	62.02	38.153					87.795	6	F6:11110	20150812RA rerun MIN6N8_UT Kd pooled.wiff	2	1	0	0	0	0	1	P01326			PEAKS DB
SYGPM(+15.99)KSGGGGGGGGSWGGRSNSGP	34.39	2225.95	25	-2.6	742.989	33.54		12.543		0			2	F2:6171	20150812RA rerun MIN6N8_AGE-BSA Kd pooled.wiff	1	0	1	0	0	0	0	Q9CX86	Oxidation (M)	M5:Oxidation (M):1000.00	PEAKS DB
DSDAENPRYEPRAPWMEQEGPEY	34.36	2765.17	23	3.3	922.732	59.9				1166.9			4	F4:10117	20150812RA rerun MIN6N8_BSA Kd pooled.wiff	1	0	0	0	1	0	0	P01899			PEAKS DB
AYLTDLTKL	34.27	1036.58	9	2.2	519.299	65.31	287.64	804.03		268.37	359.59	574.79	2	F2:11798	20150812RA rerun MIN6N8_AGE-BSA Kd pooled.wiff	5	1	1	0	1	1	1	G5E8P0			PEAKS DB
GYLPVQTVL	34.25	988.559	9	-1.7	495.286	70.37	385.17	982.17	349.54		846		2	F2:12741	20150812RA rerun MIN6N8_AGE-BSA Kd pooled.wiff	4	1	1	1	0	1	0	P11531			PEAKS DB
DYMEALTRL	34.21	1110.54	9	-1.3	556.275	70.25	362.41	848.35	251.41	404.35	416.38	726.73	4	F4:11781	20150812RA rerun MIN6N8_BSA Kd pooled.wiff	6	1	1	1	1	1	1	Q99K70			PEAKS DB
SYGDILHVI	34.18	1015.53	9	1.2	508.772	68.48		824.15	120.19			471.08	3	F3:10675	20150812RA rerun MIN6N8_BSA ALT Kd pooled.wiff	3	0	1	1	0	0	1	P70175			PEAKS DB
AYQELLRLI	34.14	1117.65	9	-1.2	559.831	76.92		169.47		62.009			2	F2:13671	20150812RA rerun MIN6N8_AGE-BSA Kd pooled.wiff	2	0	1	0	1	0	0	Q9JLB2			PEAKS DB
LYTPVRSVL	34.12	1046.61	9	-0.4	524.311	54.59	158.47				277.16		1	F1:9034	20150812RA rerun MIN6N8_AGE-BSA ALT Kd pooled.wiff	2	1	0	0	0	1	0	P06796			PEAKS DB
SYLDVKQRL	34.05	1120.62	9	2.6	561.321	45.67	234	277.23		308.12	92.635	215.68	5	F5:8852	20150812RA rerun MIN6N8_Recon ALT Kd pooled.wiff	5	1	1	0	1	1	1	P61222			PEAKS DB
KYQEVTNNL	34.03	1107.56	9	0.6	554.784	37.4	3890.8	0	41.698	3418.7	0	0	1	F1:6806	20150812RA rerun MIN6N8_AGE-BSA ALT Kd pooled.wiff	3	1	0	1	1	0	0	Q60865			PEAKS DB
SSNNLGPVLPPTNVGSNT	33.94	1766.88	18	-2.4	884.445	54.84		31.247				0	6	F6:9506	20150812RA rerun MIN6N8_UT Kd pooled.wiff	1	0	1	0	0	0	0	P12968			PEAKS DB
KYLTDQSSL	33.82	1053.53	9	-0.6	527.774	40.41	98.846			122.93			4	F4:7209	20150812RA rerun MIN6N8_BSA Kd pooled.wiff	2	1	0	0	1	0	0	Q8VBX6			PEAKS DB
SYLPTKPGEYF	33.73	1300.63	11	-1	651.324	60.3		1002.4	341.64	691.29	556.25		4	F4:10187	20150812RA rerun MIN6N8_BSA Kd pooled.wiff	4	0	1	1	1	1	0	Q80X90			PEAKS DB
FYGDVQTHI	33.71	1078.51	9	-5.8	540.256	49.29			143.95	449.09	167.71		3	F3:8840	20150812RA rerun MIN6N8_BSA ALT Kd pooled.wiff	3	0	0	1	1	1	0	Q6ZPE2			PEAKS DB
AYSKLGNYV	33.71	1013.52	9	-5	507.764	45.61	136.01			145.96			4	F4:7612	20150812RA rerun MIN6N8_BSA Kd pooled.wiff	2	1	0	0	1	0	0	Q8BJU0			PEAKS DB
SYVPARSLP	33.69	988.534	9	-5.6	495.272	43.91	742.01	979.11		644.67	248.54	407.08	5	F5:8732	20150812RA rerun MIN6N8_Recon ALT Kd pooled.wiff	5	1	1	0	1	1	1	Q9QZE5			PEAKS DB
AYAPSGNFV	33.62	924.434	9	3.2	463.226	50.23		182.08		406		238.69	6	F6:8796	20150812RA rerun MIN6N8_UT Kd pooled.wiff	3	0	1	0	1	0	1	P62880:Q61011			PEAKS DB
KYFENWSASM(+15.99)I	33.38	1390.62	11	-1.9	696.317	60.73	6428.9	10924	5024.4	4779.9		7033	2	F2:10758	20150812RA rerun MIN6N8_AGE-BSA Kd pooled.wiff	5	1	1	1	1	0	1	P00405	Oxidation (M)	M10:Oxidation (M):1000.00	PEAKS DB
KYNILGTNTI	33.36	1135.62	10	0.1	568.819	56.2			144.15		406.32	685.07	6	F6:9717	20150812RA rerun MIN6N8_UT Kd pooled.wiff	3	0	0	1	0	1	1	Q8VEK3			PEAKS DB
YYVRILSTI	33.35	1126.64	9	-1.9	564.323	66.75	263.94	429.08	109	116.17	168.17	281.3	1	F1:11241	20150812RA rerun MIN6N8_AGE-BSA ALT Kd pooled.wiff	6	1	1	1	1	1	1	P54775			PEAKS DB
QYNPSRQTL	32.92	1105.55	9	1.6	553.782	34.68	715.58	9.0381		125.69	75.276	62.477	1	F1:6440	20150812RA rerun MIN6N8_AGE-BSA ALT Kd pooled.wiff	5	1	1	0	1	1	1	Q9ESV0			PEAKS DB
SYLITSVEL	32.85	1023.55	9	1.5	512.783	73.23	806.76		302.37	269.43		615.93	6	F6:13278	20150812RA rerun MIN6N8_UT Kd pooled.wiff	4	1	0	1	1	0	1	Q9QUJ7			PEAKS DB
DYIITPHAL	32.76	1041.55	9	-3.5	521.78	59.28	1143.6	1644.8	583.51		1029.8	1720.9	6	F6:10419	20150812RA rerun MIN6N8_UT Kd pooled.wiff	5	1	1	1	0	1	1	Q3TWF6			PEAKS DB
HFLPM(+15.99)LQTV	32.66	1100.57	9	0.3	551.29	59.14	3320.8	6502.9	2379.8	3080.7	1977.8		1	F1:9897	20150812RA rerun MIN6N8_AGE-BSA ALT Kd pooled.wiff	5	1	1	1	1	1	0	Q60605	Oxidation (M)	M5:Oxidation (M):1000.00	PEAKS DB
YGELLHSL	32.64	930.481	8	7.1	466.251	62.71	0		0		0		5	F5:11585	20150812RA rerun MIN6N8_Recon ALT Kd pooled.wiff	0	0	0	0	0	0	0	P24529			PEAKS DB
SYQDTIQQL	32.57	1094.52	9	1.4	548.27	53.99	8536.2	7759.5	2582.3	6458.3	4453.7	5569.6	6	F6:9347	20150812RA rerun MIN6N8_UT Kd pooled.wiff	6	1	1	1	1	1	1	P08553			PEAKS DB
SYMPSLVVV	32.52	993.52	9	-1.9	497.765	72.86	385.05			440.99			1	F1:12006	20150812RA rerun MIN6N8_AGE-BSA ALT Kd pooled.wiff	2	1	0	0	1	0	0	Q4U2R1			PEAKS DB
TYTSARTLL	32.12	1024.56	9	-0.2	513.283	46.28	402.86			699.72	361.32	456.47	1	F1:7479	20150812RA rerun MIN6N8_AGE-BSA ALT Kd pooled.wiff	4	1	0	0	1	1	1	Q61881			PEAKS DB
SYLESKGLL	32.07	1008.55	9	1.2	505.283	54.54		2534.6	592.32		1334.9	1587.1	5	F5:10050	20150812RA rerun MIN6N8_Recon ALT Kd pooled.wiff	4	0	1	1	0	1	1	Q99ME2			PEAKS DB
KYLSVQGQ(-18.01)	32.05	903.481	8	5.1	452.748	47.14	134.87						1	F1:7598	20150812RA rerun MIN6N8_AGE-BSA ALT Kd pooled.wiff	1	1	0	0	0	0	0	Q791T5	Dehydration	Q8:Dehydration:29.39	PEAKS PTM
KYYELYETI	32	1220.6	9	-0.9	611.305	59.96	918.63	2339.6	556.8	1805.4	1096.5	2463.9	4	F4:10159	20150812RA rerun MIN6N8_BSA Kd pooled.wiff	6	1	1	1	1	1	1	Q61846			PEAKS DB
SYLKQLPHF	31.97	1131.61	9	2	566.81	55.86	23.092						1	F1:9256	20150812RA rerun MIN6N8_AGE-BSA ALT Kd pooled.wiff	1	1	0	0	0	0	0	Q6P4T2			PEAKS DB
GRMLAKELKEFREA	31.89	1676.9	14	1.4	420.234	44.29						46.66	6	F6:8067	20150812RA rerun MIN6N8_UT Kd pooled.wiff	1	0	0	0	0	0	1	P09535			PEAKS DB
KYVYLVTDL	31.79	1112.61	9	0.3	557.311	63.94	730.43	1255.1	540.96	586.02		1122.1	1	F1:10778	20150812RA rerun MIN6N8_AGE-BSA ALT Kd pooled.wiff	5	1	1	1	1	0	1	Q7TPS0			PEAKS DB
GYLGQVTTI	31.78	950.507	9	1.6	476.262	59.62	7260.1	12548	5429.6	8479	7395.1	11989	6	F6:10588	20150812RA rerun MIN6N8_UT Kd pooled.wiff	6	1	1	1	1	1	1	Q9Z1F9			PEAKS DB
DYQRLLQTI	31.75	1148.62	9	1	575.317	65.86	824.39			1195.1	967.58	1315.5	6	F6:12098	20150812RA rerun MIN6N8_UT Kd pooled.wiff	4	1	0	0	1	1	1	Q6KAQ7			PEAKS DB
GYLALVTSL	31.72	935.533	9	-1	468.773	80.47		246.56				202.27	6	F6:14316	20150812RA rerun MIN6N8_UT Kd pooled.wiff	2	0	1	0	0	0	1	P47857			PEAKS DB
SYQEM(+15.99)IANL	31.71	1083.49	9	0	542.753	55.9		1804.2	839.8	631.77	231.17		4	F4:9332	20150812RA rerun MIN6N8_BSA Kd pooled.wiff	6	0	2	2	1	1	0	Q64674	Oxidation (M)	M5:Oxidation (M):1000.00	PEAKS DB
TYQAM(+15.99)VHEL	31.39	1106.51	9	0.2	554.261	41.11	133.51	343.92		0	55.083		5	F5:8555	20150812RA rerun MIN6N8_Recon ALT Kd pooled.wiff	4	1	2	0	0	1	0	P97390	Oxidation (M)	M5:Oxidation (M):1000.00	PEAKS DB
GYLRLKMTYL	31.34	1256.7	10	-1.3	629.354	61.74						251.11	6	F6:11017	20150812RA rerun MIN6N8_UT Kd pooled.wiff	1	0	0	0	0	0	1	P46935			PEAKS DB
GYLGNLSM(+15.99)V	31.33	968.464	9	-1.1	485.239	60.11		785.79	265.63				2	F2:10484	20150812RA rerun MIN6N8_AGE-BSA Kd pooled.wiff	2	0	1	1	0	0	0	Q8BH74	Oxidation (M)	M8:Oxidation (M):1000.00	PEAKS DB
KYSEVFEAI	31.21	1084.54	9	1.5	543.278	58.58	1023.7		519.32				3	F3:9581	20150812RA rerun MIN6N8_BSA ALT Kd pooled.wiff	2	1	0	1	0	0	0	O54833:Q60737			PEAKS DB
ELQETQQERENEREEEAEQE	31.21	2532.08	20	4.5	845.039	31.43						44.657	6	F6:6470	20150812RA rerun MIN6N8_UT Kd pooled.wiff	1	0	0	0	0	0	1	Q0VGU4			PEAKS DB
KLLPSVTEL	31.18	998.601	9	1	500.308	59.84	591.6			680.87			4	F4:10120	20150812RA rerun MIN6N8_BSA Kd pooled.wiff	2	1	0	0	1	0	0	Q80UV9			PEAKS DB
VYLKTNVFL	31.17	1095.63	9	1.1	548.822	63.83	137.04	193.67	108.91	108.55			1	F1:10767	20150812RA rerun MIN6N8_AGE-BSA ALT Kd pooled.wiff	4	1	1	1	1	0	0	Q9Z186			PEAKS DB
KYMEDVTQI	31.12	1125.54	9	-1.9	563.775	48.18				811.79	438.76	769.52	4	F4:7928	20150812RA rerun MIN6N8_BSA Kd pooled.wiff	3	0	0	0	1	1	1	Q9QZ67			PEAKS DB
DYM(+15.99)EALTRL	31.04	1126.53	9	4.2	564.274	56.41	546.75	931.59	0	494.86	275.52	508.78	1	F1:9335	20150812RA rerun MIN6N8_AGE-BSA ALT Kd pooled.wiff	5	1	1	0	1	1	1	Q99K70	Oxidation (M)	M3:Oxidation (M):1000.00	PEAKS DB
EYLPSQITI	31.04	1062.56	9	0.5	532.285	67.08		0	0				3	F3:10552	20150812RA rerun MIN6N8_BSA ALT Kd pooled.wiff	0	0	0	0	0	0	0	Q8R151			PEAKS DB
GYLPGNEKL	31.01	989.518	9	1.3	495.767	47.96	2730.1	1692.4	657.98	2314.1	1132.9	1272.9	5	F5:9075	20150812RA rerun MIN6N8_Recon ALT Kd pooled.wiff	6	1	1	1	1	1	1	P97372			PEAKS DB
GYLPNKQVLGL	30.99	1200.69	11	-0.7	601.348	61.2	112.96	189.37	61.622	188.59		236.7	1	F1:10294	20150812RA rerun MIN6N8_AGE-BSA ALT Kd pooled.wiff	5	1	1	1	1	0	1	Q05915			PEAKS DB
GYVPSQADV	30.96	934.44	9	-0.8	468.225	44.87	47.611						1	F1:7302	20150812RA rerun MIN6N8_AGE-BSA ALT Kd pooled.wiff	1	1	0	0	0	0	0	O70251			PEAKS DB
SYM(+15.99)IPTNDL	30.95	1068.48	9	3.8	535.247	57.23		997.07	316.19	726.76			3	F3:9484	20150812RA rerun MIN6N8_BSA ALT Kd pooled.wiff	3	0	1	1	1	0	0	P00405	Oxidation (M)	M3:Oxidation (M):1000.00	PEAKS DB
SYM(+15.99)PQQVTV	30.94	1067.5	9	-0.9	534.755	43.98		116.29					2	F2:7309	20150812RA rerun MIN6N8_AGE-BSA Kd pooled.wiff	1	0	1	0	0	0	0	Q5SSH7	Oxidation (M)	M3:Oxidation (M):1000.00	PEAKS DB
IYNNMKQFI	30.92	1169.59	9	0.8	585.8	57.8		4843.4	556.87			4935.7	3	F3:9537	20150812RA rerun MIN6N8_BSA ALT Kd pooled.wiff	3	0	1	1	0	0	1	O55143			PEAKS DB
KYLNSVQYI	30.91	1126.6	9	-0.6	564.308	52.68						461.8	6	F6:9094	20150812RA rerun MIN6N8_UT Kd pooled.wiff	1	0	0	0	0	0	1	Q9ERD6			PEAKS DB
DYRPGITYI	30.9	1096.56	9	-5.5	549.282	56.89					167.65	149.81	6	F6:9894	20150812RA rerun MIN6N8_UT Kd pooled.wiff	2	0	0	0	0	1	1	Q8CJF8			PEAKS DB
SYVSIHSSGF	30.88	1082.5	10	-4.1	542.257	49.43	473.65	208.61	69.258	459.66	155.07	136.78	4	F4:8137	20150812RA rerun MIN6N8_BSA Kd pooled.wiff	6	1	1	1	1	1	1	Q8VDW0:Q9Z1N5			PEAKS DB
KYAPSGFYI	30.87	1044.53	9	-0.9	523.268	58.42			270.2				3	F3:9565	20150812RA rerun MIN6N8_BSA ALT Kd pooled.wiff	1	0	0	1	0	0	0	O88342			PEAKS DB
GAAAPGAGAGP(+21.98)	30.85	817.369	11	36.6	818.407	58.88						0	6	F6:10346	20150812RA rerun MIN6N8_UT Kd pooled.wiff	0	0	0	0	0	0	0	Q6R0H7	Sodium adduct	P11:Sodium adduct:1000.00	PEAKS PTM
TYIESSTKV	30.83	1026.52	9	3.6	514.269	35.3	0	49.686		19.171	0	0	1	F1:6502	20150812RA rerun MIN6N8_AGE-BSA ALT Kd pooled.wiff	2	0	1	0	1	0	0	Q8VBZ3			PEAKS DB
SFNNVKQWL	30.79	1134.58	9	11.7	568.302	63.75			6585.9				3	F3:10152	20150812RA rerun MIN6N8_BSA ALT Kd pooled.wiff	1	0	0	1	0	0	0	P62821			PEAKS DB
SYNQLVEKI	30.76	1092.58	9	-0.6	547.298	53.21				0			4	F4:8788	20150812RA rerun MIN6N8_BSA Kd pooled.wiff	0	0	0	0	0	0	0	Q76LS9:Q6PDI6			PEAKS DB
TYSSVRTEAL	30.73	1125.57	10	-10.8	563.782	38.92	19.574						1	F1:6874	20150812RA rerun MIN6N8_AGE-BSA ALT Kd pooled.wiff	1	1	0	0	0	0	0	Q6PDI5			PEAKS DB
VYKASLNLI	30.68	1019.6	9	1.5	510.809	57.86	423.61	1055.7		588.39	429.06	1020.3	6	F6:10079	20150812RA rerun MIN6N8_UT Kd pooled.wiff	5	1	1	0	1	1	1	P52293			PEAKS DB
AYNPLPLTRL	30.56	1156.66	10	-0.3	579.337	65.48	2068.3	4375.2	1765.7	2021.3	2160.6	3782.3	2	F2:11788	20150812RA rerun MIN6N8_AGE-BSA Kd pooled.wiff	6	1	1	1	1	1	1	Q62388			PEAKS DB
YYSALRHYINL	30.53	1411.72	11	4.7	706.873	60.82	79.97	838.16		119.07		128	6	F6:10826	20150812RA rerun MIN6N8_UT Kd pooled.wiff	5	1	2	0	1	0	1	P57774			PEAKS DB
GYM(+15.99)RLLEFI	30.38	1156.6	9	-0.4	579.305	75.28	2452			2046.5	1477.7	3155.4	5	F5:13407	20150812RA rerun MIN6N8_Recon ALT Kd pooled.wiff	4	1	0	0	1	1	1	Q9ER73	Oxidation (M)	M3:Oxidation (M):1000.00	PEAKS DB
YYLPTKNEI	30.32	1139.59	9	2	570.799	51.55	3840.6	4494.1	1239	2588.6	1760.4	2395.3	1	F1:8429	20150812RA rerun MIN6N8_AGE-BSA ALT Kd pooled.wiff	6	1	1	1	1	1	1	B2RQR8:P0DPD9			PEAKS DB
GYNSVQHLI	30.26	1029.52	9	-2.2	515.768	50.46			819.82	2905.9		18.307	6	F6:8822	20150812RA rerun MIN6N8_UT Kd pooled.wiff	3	0	0	1	1	0	1	Q91V83			PEAKS DB
HFLPMLQTV	30.24	1084.57	9	1.8	543.295	68.43	1862.5	4226.7	1443.7	1547.6	2372.6	4817	2	F2:12477	20150812RA rerun MIN6N8_AGE-BSA Kd pooled.wiff	6	1	1	1	1	1	1	Q60605			PEAKS DB
GYLPLAHVL	30.2	981.565	9	-0.1	491.79	68.89	1196.3	3450.8	974.44	1440	486.72	2499.3	5	F5:12844	20150812RA rerun MIN6N8_Recon ALT Kd pooled.wiff	6	1	1	1	1	1	1	Q9QUJ7			PEAKS DB
VYLPTHTSL	30.06	1029.55	9	1.4	515.783	50.57			819.82		1158.9	1776	5	F5:9507	20150812RA rerun MIN6N8_Recon ALT Kd pooled.wiff	3	0	0	1	0	1	1	Q8BM54			PEAKS DB
TYIGSVELV	30.05	979.523	9	2.4	490.767	65.68			600.63			1716.5	3	F3:10406	20150812RA rerun MIN6N8_BSA ALT Kd pooled.wiff	2	0	0	1	0	0	1	Q01320			PEAKS DB
DYYPDRTYI	29.99	1204.54	9	2.1	603.279	52.54	1808.3	2079	329.61		673.57	537.34	5	F5:9745	20150812RA rerun MIN6N8_Recon ALT Kd pooled.wiff	5	1	1	1	0	1	1	Q8JZL7			PEAKS DB
KYETNLTFV	29.94	1113.57	9	-0.6	557.792	55.69	1632.8	2192.3	1132.8	3421.8	1793.7	2919.3	6	F6:9604	20150812RA rerun MIN6N8_UT Kd pooled.wiff	6	1	1	1	1	1	1	O55143			PEAKS DB
KYDPINSM(+15.99)L	29.74	1095.53	9	0	548.771	45.48	502.22		120.02	955.24	414.83	779.21	6	F6:8161	20150812RA rerun MIN6N8_UT Kd pooled.wiff	5	1	0	1	1	1	1	Q91VC9	Oxidation (M)	M8:Oxidation (M):1000.00	PEAKS DB
GYQDSIGQL	29.67	979.461	9	-0.4	490.735	53.55		3417.8	599.33	2877.6	1995.3	2590.9	3	F3:9191	20150812RA rerun MIN6N8_BSA ALT Kd pooled.wiff	5	0	1	1	1	1	1	P46660			PEAKS DB
LVRSSNNLGPVLPPTNVGSNTY(-.98)	29.61	2297.21	22	1	766.746	55.73					942.56		5	F5:10345	20150812RA rerun MIN6N8_Recon ALT Kd pooled.wiff	1	0	0	0	0	1	0	P12968	Amidation	Y22:Amidation:1000.00	PEAKS PTM
SYLYTGDFHQL	29.46	1342.62	11	0.6	672.317	62.48			3.7326	92.869		140.22	6	F6:11251	20150812RA rerun MIN6N8_UT Kd pooled.wiff	3	0	0	1	1	0	1	Q8C419			PEAKS DB
GYAKLIAEL	29.45	976.559	9	0.3	489.287	65.28			124.69	116.49	140.83	276.52	5	F5:12192	20150812RA rerun MIN6N8_Recon ALT Kd pooled.wiff	4	0	0	1	1	1	1	B1AZI6			PEAKS DB
VYDLLKTNL	29.43	1077.61	9	-2.5	539.807	62.23	110.87	165.19				194.28	1	F1:10470	20150812RA rerun MIN6N8_AGE-BSA ALT Kd pooled.wiff	3	1	1	0	0	0	1	Q3TXS7			PEAKS DB
KYQDILNEI	29.38	1134.59	9	3.9	568.303	63.77	7691	14384	6585.9	6623.3	7858.2	12504	1	F1:10779	20150812RA rerun MIN6N8_AGE-BSA ALT Kd pooled.wiff	6	1	1	1	1	1	1	Q3UQ44			PEAKS DB
IYEETRGVL	29.02	1078.57	9	-2.8	540.287	44.52	89.508						1	F1:7276	20150812RA rerun MIN6N8_AGE-BSA ALT Kd pooled.wiff	1	1	0	0	0	0	0	P62806			PEAKS DB
QFNSSLHNI	29	1058.51	9	5.2	530.265	44.81	155.91				43.99		1	F1:7298	20150812RA rerun MIN6N8_AGE-BSA ALT Kd pooled.wiff	2	1	0	0	0	1	0	O35166			PEAKS DB
SYLTSASSL	28.93	927.455	9	4.8	464.737	54.25	409.96			358.74	209.46	252.44	5	F5:10019	20150812RA rerun MIN6N8_Recon ALT Kd pooled.wiff	4	1	0	0	1	1	1	Q80TP3			PEAKS DB
IYNPLFGSDL	28.92	1137.57	10	1.3	569.793	78.27	0			182.16	134.68	320.23	6	F6:14179	20150812RA rerun MIN6N8_UT Kd pooled.wiff	3	0	0	0	1	1	1	Q6S5J6			PEAKS DB
CNTAT(-2.02)CATQRLANF	28.87	1510.67	14	-3.9	756.334	55.26	132.51	0	134.15		117.33	527.37	1	F1:9127	20150812RA rerun MIN6N8_AGE-BSA ALT Kd pooled.wiff	4	1	0	1	0	1	1	P12968	2-amino-3-oxo-butanoic_acid	T5:2-amino-3-oxo-butanoic_acid:0.00	PEAKS PTM
SYLEDKDLV	28.82	1080.53	9	-1	541.274	50.83	102.19	254.34			114.62	148.4	2	F2:8392	20150812RA rerun MIN6N8_AGE-BSA Kd pooled.wiff	4	1	1	0	0	1	1	P52332			PEAKS DB
RYLQTLTTI	28.77	1107.63	9	0.5	554.82	55.72	768.17	2110	426.97	1414.5	818.04	1799.9	1	F1:9211	20150812RA rerun MIN6N8_AGE-BSA ALT Kd pooled.wiff	6	1	1	1	1	1	1	P54116			PEAKS DB
KYLGQLTSI	28.76	1021.58	9	1.2	511.798	54.16		396.93				479.32	6	F6:9398	20150812RA rerun MIN6N8_UT Kd pooled.wiff	2	0	1	0	0	0	1	Q8K2Y9			PEAKS DB
YVPGFAHI	28.76	902.465	8	-1.4	452.237	59.16	0						1	F1:9894	20150812RA rerun MIN6N8_AGE-BSA ALT Kd pooled.wiff	0	0	0	0	0	0	0	Q9CXX9			PEAKS DB
RYLPAPTAL	28.63	1000.57	9	1.9	501.293	51.76	260.72	437.39		517.98	256.07	670.15	6	F6:8982	20150812RA rerun MIN6N8_UT Kd pooled.wiff	5	1	1	0	1	1	1	Q9JL70			PEAKS DB
SYLEVPGRL	28.58	1032.56	9	-2.7	517.286	57.13		353.4			348.71	548.45	2	F2:9811	20150812RA rerun MIN6N8_AGE-BSA Kd pooled.wiff	3	0	1	0	0	1	1	Q9CPW0			PEAKS DB
EYVANLTNL	28.56	1035.52	9	5	518.769	62.11			404.01		832.74		3	F3:10000	20150812RA rerun MIN6N8_BSA ALT Kd pooled.wiff	2	0	0	1	0	1	0	Q6DIC0			PEAKS DB
HYGESITNI	28.51	1032.49	9	11.6	517.257	44.87	154	117.72		116.2		86.63	4	F4:7515	20150812RA rerun MIN6N8_BSA Kd pooled.wiff	4	1	1	0	1	0	1	Q80YA3			PEAKS DB
KYTVAPTSL	28.42	978.539	9	3.1	490.276	44.02	0	65.223		43.456			1	F1:7240	20150812RA rerun MIN6N8_AGE-BSA ALT Kd pooled.wiff	2	0	1	0	1	0	0	Q8BRG8			PEAKS DB
PGDSDIIRSM(+15.99)PEQTGEK	28.37	1874.87	17	-1.8	625.96	33.67	0						1	F1:6321	20150812RA rerun MIN6N8_AGE-BSA ALT Kd pooled.wiff	0	0	0	0	0	0	0	P62889	Oxidation (M)	M10:Oxidation (M):1000.00	PEAKS DB
TGSAASSGSSSSV	28.34	1083.47	13	19.6	542.752	56.03						652.7	6	F6:9701	20150812RA rerun MIN6N8_UT Kd pooled.wiff	1	0	0	0	0	0	1	Q9QXV9			PEAKS DB
NFIGTKTVI	28.32	991.57	9	-0.3	496.792	52.76	2406.6	3957.4	2065.4		2864.1	5459.7	2	F2:8773	20150812RA rerun MIN6N8_AGE-BSA Kd pooled.wiff	5	1	1	1	0	1	1	Q9R1J0			PEAKS DB
KYQQLFEDI	28.27	1182.59	9	-1.4	592.303	63.09			660.26	853.02	864.51	1286.6	5	F5:11680	20150812RA rerun MIN6N8_Recon ALT Kd pooled.wiff	4	0	0	1	1	1	1	P49717			PEAKS DB
KYLAIAPPII	28.07	1097.68	10	-2.1	549.848	68.07	10.842	93.351		36.085		95.577	4	F4:11493	20150812RA rerun MIN6N8_BSA Kd pooled.wiff	4	1	1	0	1	0	1	Q3U1J4			PEAKS DB
TYGALVTQL	28.03	964.523	9	1.4	483.269	62.79	1932.6	3056.7	1399.4			3453.2	2	F2:11189	20150812RA rerun MIN6N8_AGE-BSA Kd pooled.wiff	4	1	1	1	0	0	1	O55013			PEAKS DB
YNRLKSLI	28.02	1005.6	8	-2.5	503.805	48.92	837.21	1148.7	457.67	1501.5			4	F4:8061	20150812RA rerun MIN6N8_BSA Kd pooled.wiff	4	1	1	1	1	0	0	Q920E5			PEAKS DB
IQKTPQIQVY	27.96	1216.68	10	-1	609.347	46.29					179.88		5	F5:8916	20150812RA rerun MIN6N8_Recon ALT Kd pooled.wiff	1	0	0	0	0	1	0	P01887			PEAKS DB
LELGGGPGAGDLQT	27.78	1283.64	14	-2.1	642.824	53.93						612.43	6	F6:9339	20150812RA rerun MIN6N8_UT Kd pooled.wiff	1	0	0	0	0	0	1	P01326			PEAKS DB
KYPELLNTNQL	27.76	1331.71	11	-3	666.86	59.48	963.42	1533.6					2	F2:10292	20150812RA rerun MIN6N8_AGE-BSA Kd pooled.wiff	2	1	1	0	0	0	0	Q03517			PEAKS DB
KYQIAVTKV	27.72	1048.63	9	6.4	525.325	38.96	0			3.2296			4	F4:7118	20150812RA rerun MIN6N8_BSA Kd pooled.wiff	1	0	0	0	1	0	0	Q9CU62			PEAKS DB
AYKAVLNYL	27.72	1053.59	9	0.8	527.801	61.82	994.42	2493	967.7		1046.4		2	F2:10971	20150812RA rerun MIN6N8_AGE-BSA Kd pooled.wiff	4	1	1	1	0	1	0	Q3TUU5			PEAKS DB
SYQQALLRI	27.66	1090.61	9	-22.7	546.299	60.58			259.65				3	F3:9802	20150812RA rerun MIN6N8_BSA ALT Kd pooled.wiff	1	0	0	1	0	0	0	Q9ERC3			PEAKS DB
NGLLDELKTV	27.6	1100.61	10	-36.1	551.291	59.27	3320.8	6502.9	2379.8	3080.7	1977.8	3494.6	5	F5:10891	20150812RA rerun MIN6N8_Recon ALT Kd pooled.wiff	6	1	1	1	1	1	1	E9PVA8			PEAKS DB
KYQTVIDDI	27.58	1093.57	9	11.1	547.796	54.48			1463.8	4112	2602.7	3830.4	5	F5:10021	20150812RA rerun MIN6N8_Recon ALT Kd pooled.wiff	4	0	0	1	1	1	1	P53798			PEAKS DB
NYISGIQTI	27.57	1007.53	9	0.8	504.772	60.93	3441.2	5660		4403.2	3176.1	4697.9	5	F5:11175	20150812RA rerun MIN6N8_Recon ALT Kd pooled.wiff	5	1	1	0	1	1	1	Q921M3			PEAKS DB
GYLAIVEHL	27.47	1013.55	9	0.3	507.785	71.42		84.115					2	F2:12840	20150812RA rerun MIN6N8_AGE-BSA Kd pooled.wiff	1	0	1	0	0	0	0	Q9Z1E3			PEAKS DB
YSALRHYINLITRQRYG	27.41	2123.14	17	-3.4	531.79	63.31		76.704					2	F2:11364	20150812RA rerun MIN6N8_AGE-BSA Kd pooled.wiff	1	0	1	0	0	0	0	P57774			PEAKS DB
GYSPQLQGL	27.4	961.487	9	0.8	481.751	56.31	338.44					171.27	6	F6:9758	20150812RA rerun MIN6N8_UT Kd pooled.wiff	2	1	0	0	0	0	1	Q8BRG8			PEAKS DB
GYISVVDTL	27.3	965.507	9	-1.5	483.76	68.41	714.82	1487.4		566.79		1198.1	4	F4:11540	20150812RA rerun MIN6N8_BSA Kd pooled.wiff	4	1	1	0	1	0	1	Q8C8R3:G5E8K5			PEAKS DB
RYKQLLTYI	27.29	1196.69	9	0	599.35	56.6	841.94		533.86		872.4	1412.1	3	F3:9428	20150812RA rerun MIN6N8_BSA ALT Kd pooled.wiff	4	1	0	1	0	1	1	P61202			PEAKS DB
FYRQVSTSL	27.24	1099.57	9	2.4	550.79	44.98	49.34						1	F1:7322	20150812RA rerun MIN6N8_AGE-BSA ALT Kd pooled.wiff	1	1	0	0	0	0	0	Q8CGN4			PEAKS DB
GAPLDGSDPQAL	27.21	1139.55	12	-40.1	570.757	48.19		2275.7		3046.4			4	F4:7963	20150812RA rerun MIN6N8_BSA Kd pooled.wiff	2	0	1	0	1	0	0	Q3TKT4			PEAKS DB
HYFNTPFQL	27.07	1165.56	9	2.3	583.786	69.17	70.363	281.06					2	F2:12580	20150812RA rerun MIN6N8_AGE-BSA Kd pooled.wiff	2	1	1	0	0	0	0	Q6NVE9			PEAKS DB
QYQIIMTMI	27.05	1139.57	9	1.6	570.792	80.57		0	97.767	144.6			3	F3:11557	20150812RA rerun MIN6N8_BSA ALT Kd pooled.wiff	2	0	0	1	1	0	0	Q9Z0R9			PEAKS DB
GYLKGYTLV	27.04	1012.56	9	-2.4	507.286	56.78		618.95	120.95	416.41		360.66	6	F6:9873	20150812RA rerun MIN6N8_UT Kd pooled.wiff	4	0	1	1	1	0	1	Q9CWZ3			PEAKS DB
QYLPIKEAV	27.03	1059.6	9	3.5	530.805	51.27	237.67			235.39			1	F1:8411	20150812RA rerun MIN6N8_AGE-BSA ALT Kd pooled.wiff	2	1	0	0	1	0	0	Q8BH58			PEAKS DB
SYMPTVSHL	27.02	1033.49	9	4.6	517.755	52.42	117.52	578.08		379.8	211.09	302.27	2	F2:8692	20150812RA rerun MIN6N8_AGE-BSA Kd pooled.wiff	5	1	1	0	1	1	1	Q9Z2E9			PEAKS DB
FYEKVQSDL	26.99	1127.55	9	-2.8	564.781	45.84		101.06		368.97		0	4	F4:7651	20150812RA rerun MIN6N8_BSA Kd pooled.wiff	2	0	1	0	1	0	0	Q8K2P7			PEAKS DB
SFIPAVNDL	26.91	974.507	9	-0.7	488.258	71.78	327.33		244.85		309.38		3	F3:10933	20150812RA rerun MIN6N8_BSA ALT Kd pooled.wiff	3	1	0	1	0	1	0	Q8BHX1			PEAKS DB
SYDEMKDLL	26.89	1112.51	9	-0.3	557.258	61.14		635.6	132.36	463.32		756.14	3	F3:9885	20150812RA rerun MIN6N8_BSA ALT Kd pooled.wiff	4	0	1	1	1	0	1	O55112			PEAKS DB
E(-18.01)YIHSKNFI	26.89	1131.57	9	0.6	378.198	43.81		172.7					2	F2:7301	20150812RA rerun MIN6N8_AGE-BSA Kd pooled.wiff	1	0	1	0	0	0	0	Q9JMK2:Q9DC28	Pyro-glu from E	E1:Pyro-glu from E:1000.00	PEAKS PTM
TYLETKGAAL	26.78	1065.57	10	1.6	533.791	44.9	0						1	F1:7309	20150812RA rerun MIN6N8_AGE-BSA ALT Kd pooled.wiff	0	0	0	0	0	0	0	Q9D2I5			PEAKS DB
GYVQVEEYI	26.73	1098.52	9	-3.8	550.267	66.41	434.4	257.89	150.9	361.82			4	F4:11272	20150812RA rerun MIN6N8_BSA Kd pooled.wiff	4	1	1	1	1	0	0	Q8BH97			PEAKS DB
SYIHQRYIL	26.56	1191.64	9	-1.5	596.826	47.59						51.746	6	F6:8443	20150812RA rerun MIN6N8_UT Kd pooled.wiff	1	0	0	0	0	0	1	O35495			PEAKS DB
EVEDPQVEQLELGGSPGDLQ	26.46	2138	20	-4.8	713.671	64.42						355.13	6	F6:11721	20150812RA rerun MIN6N8_UT Kd pooled.wiff	1	0	0	0	0	0	1	P01325			PEAKS DB
GYQRLLELI	26.43	1103.63	9	-0.2	552.824	76.16	191.86		63.424			412.92	6	F6:13635	20150812RA rerun MIN6N8_UT Kd pooled.wiff	3	1	0	1	0	0	1	A2AIV2			PEAKS DB
TYSIHVYPGYGI	26.33	1368.67	12	-0.5	685.343	63.73				79.545			4	F4:10843	20150812RA rerun MIN6N8_BSA Kd pooled.wiff	1	0	0	0	1	0	0	Q4V9Z5			PEAKS DB
LYQSLLTQV	26.26	1063.59	9	0.2	532.803	67.34		2876.4		1244.9	1395.5	1858.1	6	F6:12345	20150812RA rerun MIN6N8_UT Kd pooled.wiff	4	0	1	0	1	1	1	Q7TQK1			PEAKS DB
GYMRLLEFI	26.09	1140.6	9	0.5	571.308	83.02				0	381.29		5	F5:14423	20150812RA rerun MIN6N8_Recon ALT Kd pooled.wiff	1	0	0	0	0	1	0	Q9ER73			PEAKS DB
IEEVEEK(+114.04)RK	26.02	1272.67	9	-37.8	637.317	42.94		168.98		122.07	386.01		2	F2:7246	20150812RA rerun MIN6N8_AGE-BSA Kd pooled.wiff	3	0	1	0	1	1	0	Q0VGU4	Ubiquitin	K7:Ubiquitin:25.66	PEAKS PTM
ELGGGPGAGDLQT	25.9	1170.55	13	-1.9	586.282	43.07						42.531	6	F6:7971	20150812RA rerun MIN6N8_UT Kd pooled.wiff	1	0	0	0	0	0	1	P01326			PEAKS DB
SYSATKETL	25.9	998.492	9	-3.1	500.25	33.1	110.4						1	F1:6248	20150812RA rerun MIN6N8_AGE-BSA ALT Kd pooled.wiff	1	1	0	0	0	0	0	P09405			PEAKS DB
KYMEPLQEI	25.77	1149.57	9	-1.2	575.794	56.47	94.503	243.44		165.04	153.86	369.62	5	F5:10379	20150812RA rerun MIN6N8_Recon ALT Kd pooled.wiff	5	1	1	0	1	1	1	Q80TY5			PEAKS DB
SFVNTM(+15.99)TSL	25.65	1014.47	9	31.1	508.258	52.48						0	6	F6:9079	20150812RA rerun MIN6N8_UT Kd pooled.wiff	0	0	0	0	0	0	0	P28660	Oxidation (M)	M6:Oxidation (M):1000.00	PEAKS DB
TFVPVANEL	25.62	988.523	9	-19.3	495.259	63.57				0			4	F4:10815	20150812RA rerun MIN6N8_BSA Kd pooled.wiff	0	0	0	0	0	0	0	Q5SYD0			PEAKS DB
AYQSIQSYL	25.6	1071.52	9	1.3	536.77	65		2063.8	734.03	1626.9		2439.8	6	F6:11848	20150812RA rerun MIN6N8_UT Kd pooled.wiff	4	0	1	1	1	0	1	Q925U4			PEAKS DB
M(+15.99)YFQTHDQI	25.52	1197.51	9	-1.9	599.762	45.12		83.078		122.75			2	F2:7406	20150812RA rerun MIN6N8_AGE-BSA Kd pooled.wiff	2	0	1	0	1	0	0	Q9EPU0	Oxidation (M)	M1:Oxidation (M):1000.00	PEAKS DB
AGKEGAKGDPGP	25.41	1082.54	12	19.9	542.286	59.33				174.4			4	F4:10006	20150812RA rerun MIN6N8_BSA Kd pooled.wiff	1	0	0	0	1	0	0	Q61245			PEAKS DB
SYENMVTEI	25.4	1084.47	9	-2.2	543.243	61.43	1500.7	3780.9		2601.7		4466.5	4	F4:10433	20150812RA rerun MIN6N8_BSA Kd pooled.wiff	4	1	1	0	1	0	1	P54728			PEAKS DB
EM(+15.99)KSLLTVK	25.36	1063.59	9	-0.4	532.804	67.4		2876.4					2	F2:12176	20150812RA rerun MIN6N8_AGE-BSA Kd pooled.wiff	1	0	1	0	0	0	0	A2ASS6	Oxidation (M)	M2:Oxidation (M):1000.00	PEAKS DB
RYMELYTHV	25.34	1210.58	9	2	606.299	47.47				203.96		313.09	6	F6:8426	20150812RA rerun MIN6N8_UT Kd pooled.wiff	2	0	0	0	1	0	1	Q9WTX6			PEAKS DB
SYLFSHVPL	25.29	1061.55	9	-0.3	531.784	68.36	473.66	1240.8	273.34	468.47			4	F4:11521	20150812RA rerun MIN6N8_BSA Kd pooled.wiff	4	1	1	1	1	0	0	Q9CS42			PEAKS DB
SYAAISEVDRL	25.19	1222.62	11	-0.4	612.317	57.8					0	134.82	6	F6:10072	20150812RA rerun MIN6N8_UT Kd pooled.wiff	1	0	0	0	0	0	1	O08585			PEAKS DB
GYLLDKETL	25.16	1050.56	9	1.8	526.288	54.95						360.68	6	F6:9518	20150812RA rerun MIN6N8_UT Kd pooled.wiff	1	0	0	0	0	0	1	Q80ZJ6			PEAKS DB
SYENM(+15.99)VTEI	25.09	1100.47	9	0.9	551.243	48.75			1870.8	2934.4	3913.4	1950.2	4	F4:8104	20150812RA rerun MIN6N8_BSA Kd pooled.wiff	5	0	0	1	1	2	1	P54728	Oxidation (M)	M5:Oxidation (M):1000.00	PEAKS DB
FYLPGLAPV	25.06	975.543	9	3.5	488.781	80.18		503		69.542		218.56	6	F6:14298	20150812RA rerun MIN6N8_UT Kd pooled.wiff	3	0	1	0	1	0	1	P58021			PEAKS DB
YFPEITHI	24.99	1018.51	8	1	510.264	65.91	0	0				360.61	6	F6:12115	20150812RA rerun MIN6N8_UT Kd pooled.wiff	1	0	0	0	0	0	1	P52332			PEAKS DB
SYLDGKGNL	24.98	965.482	9	4.1	483.75	43.51				110.45			4	F4:7422	20150812RA rerun MIN6N8_BSA Kd pooled.wiff	1	0	0	0	1	0	0	Q8R2K4			PEAKS DB
KYVNSIWDL	24.97	1136.59	9	-2.5	569.299	68.99	1470.4		1207.1	1770.9		3376.8	6	F6:12716	20150812RA rerun MIN6N8_UT Kd pooled.wiff	4	1	0	1	1	0	1	Q9JLV5			PEAKS DB
KCNT(-2.02)ATCATQRLANF	24.95	1638.76	15	-3.6	820.381	48.89	1203.8	1733.2	128.18				3	F3:8808	20150812RA rerun MIN6N8_BSA ALT Kd pooled.wiff	3	1	1	1	0	0	0	P12968	2-amino-3-oxo-butanoic_acid	T4:2-amino-3-oxo-butanoic_acid:11.10	PEAKS PTM
FYEKVQSDLL	24.92	1240.63	10	5.1	621.327	56.08	132.45	137.64		137.44		114.41	6	F6:9710	20150812RA rerun MIN6N8_UT Kd pooled.wiff	4	1	1	0	1	0	1	Q8K2P7			PEAKS DB
YYLPLGKTL	24.91	1066.61	9	0.9	534.309	64.17	145.38	322.8	107.38			310	1	F1:10818	20150812RA rerun MIN6N8_AGE-BSA ALT Kd pooled.wiff	4	1	1	1	0	0	1	Q8BL99			PEAKS DB
EY(-18.01)IHSKNFI	24.85	1131.57	9	1.8	378.198	43.73				167.96			4	F4:7449	20150812RA rerun MIN6N8_BSA Kd pooled.wiff	1	0	0	0	1	0	0	Q9JMK2:Q9DC28	Dehydration	Y2:Dehydration:49.37	PEAKS PTM
YYETSIHAI	24.83	1095.52	9	0.5	548.767	48.89			118.43				3	F3:8817	20150812RA rerun MIN6N8_BSA ALT Kd pooled.wiff	1	0	0	1	0	0	0	Q80TL0			PEAKS DB
AYAIIKEEL	24.71	1048.58	9	4.4	525.3	55.35						112.44	6	F6:9592	20150812RA rerun MIN6N8_UT Kd pooled.wiff	1	0	0	0	0	0	1	Q8CDM1			PEAKS DB
VLPPTNVGSNTYG	24.69	1317.66	13	-3.4	659.833	45.76	1210.2		0			1774	6	F6:8255	20150812RA rerun MIN6N8_UT Kd pooled.wiff	2	1	0	0	0	0	1	P12968			PEAKS DB
KYAMMFAEL	24.63	1102.52	9	2.8	552.266	70.25	214.11	1431.6				1275.3	1	F1:11774	20150812RA rerun MIN6N8_AGE-BSA ALT Kd pooled.wiff	3	1	1	0	0	0	1	Q7TMY8			PEAKS DB
LYIPGRQVI	24.6	1057.63	9	-0.5	529.821	56.2		4137.5				3495.1	6	F6:9699	20150812RA rerun MIN6N8_UT Kd pooled.wiff	2	0	1	0	0	0	1	Q8BNE1			PEAKS DB
VYWKIYNSI	24.5	1184.62	9	5.5	593.322	65.74					218.2		5	F5:12304	20150812RA rerun MIN6N8_Recon ALT Kd pooled.wiff	1	0	0	0	0	1	0	Q99NB9			PEAKS DB
SYLEMGHDI	24.48	1063.46	9	-1.9	532.739	53.63		617.25		456.35	239.87	918.49	4	F4:8873	20150812RA rerun MIN6N8_BSA Kd pooled.wiff	4	0	1	0	1	1	1	P08775			PEAKS DB
SYQEMIANL	24.45	1067.5	9	0.9	534.756	68.78				1056.8	1431.7		5	F5:12847	20150812RA rerun MIN6N8_Recon ALT Kd pooled.wiff	2	0	0	0	1	1	0	Q64674			PEAKS DB
LYRQSLEII	24.18	1133.64	9	-1.4	567.826	58.3		1462.9	645.83	884.39		1568.4	3	F3:9553	20150812RA rerun MIN6N8_BSA ALT Kd pooled.wiff	4	0	1	1	1	0	1	P97287			PEAKS DB
FYFASKLVL	24.11	1086.61	9	7.1	544.315	74	83.313	0					1	F1:12076	20150812RA rerun MIN6N8_AGE-BSA ALT Kd pooled.wiff	1	1	0	0	0	0	0	Q07813			PEAKS DB
EYILEPVML	24.06	1105.57	9	6.4	553.797	53.8	369.47				363.68		5	F5:9979	20150812RA rerun MIN6N8_Recon ALT Kd pooled.wiff	2	1	0	0	0	1	0	Q80TF6			PEAKS DB
KYDEAASYI	23.98	1058.49	9	-6.7	530.25	45.84	292.1	299.31		310.71	89.678		5	F5:8861	20150812RA rerun MIN6N8_Recon ALT Kd pooled.wiff	4	1	1	0	1	1	0	P08752			PEAKS DB
NYIESASEL	23.93	1024.47	9	0.1	513.241	54.75	364.87			56.41			1	F1:9046	20150812RA rerun MIN6N8_AGE-BSA ALT Kd pooled.wiff	2	1	0	0	1	0	0	Q8BVG5			PEAKS DB
SYHTDINML	23.91	1092.49	9	-0.6	547.252	52.77		457.04			428.88	1119.7	5	F5:9791	20150812RA rerun MIN6N8_Recon ALT Kd pooled.wiff	3	0	1	0	0	1	1	P13864			PEAKS DB
TYLPAGQSVL	23.82	1047.56	10	-0.2	524.785	58.76			343.85				3	F3:9598	20150812RA rerun MIN6N8_BSA ALT Kd pooled.wiff	1	0	0	1	0	0	0	P67778			PEAKS DB
GYVETPRGL	23.81	990.513	9	-1.1	496.263	45.84	521.94			1032			4	F4:7622	20150812RA rerun MIN6N8_BSA Kd pooled.wiff	2	1	0	0	1	0	0	P27659			PEAKS DB
KFIATLQYI	23.72	1095.63	9	-0.6	548.823	65.85		0		672.92		1178.1	2	F2:11925	20150812RA rerun MIN6N8_AGE-BSA Kd pooled.wiff	2	0	0	0	1	0	1	Q9QUR6			PEAKS DB
AQTVLPPGQPLA	23.69	1190.67	12	-46.5	596.31	62.69	129.75						1	F1:10583	20150812RA rerun MIN6N8_AGE-BSA ALT Kd pooled.wiff	1	1	0	0	0	0	0	Q9QZ04			PEAKS DB
SYM(+15.99)PSLVVV	23.68	1009.52	9	-1	505.764	62.68		1803.4				1111.2	2	F2:11227	20150812RA rerun MIN6N8_AGE-BSA Kd pooled.wiff	2	0	1	0	0	0	1	Q4U2R1	Oxidation (M)	M3:Oxidation (M):1000.00	PEAKS DB
SFVSVLHAL	23.6	971.544	9	5.7	486.78	72.75		473.35	78.494				3	F3:11005	20150812RA rerun MIN6N8_BSA ALT Kd pooled.wiff	2	0	1	1	0	0	0	Q91V83			PEAKS DB
EFKELALTCA	23.6	1123.56	10	40	562.809	63.62						592.35	6	F6:11505	20150812RA rerun MIN6N8_UT Kd pooled.wiff	1	0	0	0	0	0	1	P21271			PEAKS DB
SPQGPVPHYS	23.53	1067.5	10	27.1	534.771	40.7	14594	3958.4					1	F1:6963	20150812RA rerun MIN6N8_AGE-BSA ALT Kd pooled.wiff	2	1	1	0	0	0	0	Q571K4			PEAKS DB
YYFPVKNVI	23.51	1141.62	9	0.2	571.816	65.65		5284.9				3447.5	2	F2:11835	20150812RA rerun MIN6N8_AGE-BSA Kd pooled.wiff	2	0	1	0	0	0	1	Q921M3			PEAKS DB
AGGGHAEIVQI	23.5	1050.55	11	-18.7	526.268	64.46	1301.1						1	F1:10923	20150812RA rerun MIN6N8_AGE-BSA ALT Kd pooled.wiff	1	1	0	0	0	0	0	Q6S5J6			PEAKS DB
KDYQPGITFI	23.48	1180.61	10	-0.3	591.313	62.07			311.3	292.98			4	F4:10519	20150812RA rerun MIN6N8_BSA Kd pooled.wiff	2	0	0	1	1	0	0	Q8CJG0			PEAKS DB
SYSKALGYL	23.44	1000.52	9	4.2	501.271	53.8					79.32		5	F5:9942	20150812RA rerun MIN6N8_Recon ALT Kd pooled.wiff	1	0	0	0	0	1	0	P49025			PEAKS DB
TYLKDLEVI	23.38	1092.61	9	4.3	547.311	64.63	1324.3		967.31				1	F1:10886	20150812RA rerun MIN6N8_AGE-BSA ALT Kd pooled.wiff	2	1	0	1	0	0	0	F8VPU2			PEAKS DB
TYQLGFHSI	23.33	1064.53	9	3.8	533.274	58.65				250.14			4	F4:9885	20150812RA rerun MIN6N8_BSA Kd pooled.wiff	1	0	0	0	1	0	0	Q60692			PEAKS DB
SYHPALNAIL	23.3	1097.59	10	-2.1	549.798	60.51	3176.9		2670.4	2413.9		5595.8	1	F1:10150	20150812RA rerun MIN6N8_AGE-BSA ALT Kd pooled.wiff	4	1	0	1	1	0	1	O88738			PEAKS DB
YYLDSLDRI	23.18	1156.58	9	1	579.294	64.05	1999.8						1	F1:10788	20150812RA rerun MIN6N8_AGE-BSA ALT Kd pooled.wiff	1	1	0	0	0	0	0	P18872			PEAKS DB
AYFHLLNQI	23.12	1117.59	9	-0.1	559.803	69.46	864.59	2171					2	F2:12599	20150812RA rerun MIN6N8_AGE-BSA Kd pooled.wiff	2	1	1	0	0	0	0	Q3V0K9			PEAKS DB
FYAELYHII	23.1	1167.6	9	-4.7	584.803	73.94	72.236	301.11	0			240.7	2	F2:13115	20150812RA rerun MIN6N8_AGE-BSA Kd pooled.wiff	3	1	1	0	0	0	1	P97372			PEAKS DB
VYSRTFTWL	23.07	1171.6	9	-0.5	586.808	68.72		1047.8				547.36	2	F2:12464	20150812RA rerun MIN6N8_AGE-BSA Kd pooled.wiff	2	0	1	0	0	0	1	Q9WTI7			PEAKS DB
GYMPMTPGAAL	23.06	1107.51	11	3.3	554.764	64.47				350.48	480.08	1305.2	5	F5:11992	20150812RA rerun MIN6N8_Recon ALT Kd pooled.wiff	3	0	0	0	1	1	1	P81122			PEAKS DB
SYLPTKPGEYFV	23.06	1399.7	12	6.4	700.86	63.31	67.121			56.906			1	F1:10688	20150812RA rerun MIN6N8_AGE-BSA ALT Kd pooled.wiff	2	1	0	0	1	0	0	Q80X90			PEAKS DB
IYEGQITAL	23.04	1006.53	9	1	504.273	58.53	0		180.52				1	F1:9748	20150812RA rerun MIN6N8_AGE-BSA ALT Kd pooled.wiff	1	0	0	1	0	0	0	Q8K448			PEAKS DB
YSALRHYI	22.92	1021.53	8	2.3	511.776	50.79				96.451			4	F4:8394	20150812RA rerun MIN6N8_BSA Kd pooled.wiff	1	0	0	0	1	0	0	P57774			PEAKS DB
TYQLNIHDI	22.89	1115.56	9	3.5	558.79	60.24		0					2	F2:10569	20150812RA rerun MIN6N8_AGE-BSA Kd pooled.wiff	0	0	0	0	0	0	0	A2AN08			PEAKS DB
HLNALGISAV	22.87	993.561	10	-41.2	497.767	44.29		752.68		527.66		416	6	F6:8068	20150812RA rerun MIN6N8_UT Kd pooled.wiff	3	0	1	0	1	0	1	Q5SSZ5			PEAKS DB
TYLVSKESI	22.79	1038.56	9	-7.5	520.281	46	410.3	551.25					1	F1:7453	20150812RA rerun MIN6N8_AGE-BSA ALT Kd pooled.wiff	2	1	1	0	0	0	0	Q6PNC0			PEAKS DB
SSYLTSASSL	22.76	1014.49	10	10.1	508.256	54						0	6	F6:9377	20150812RA rerun MIN6N8_UT Kd pooled.wiff	0	0	0	0	0	0	0	Q80TP3			PEAKS DB
SYHPALNAI	22.73	984.503	9	2.8	493.258	47.37	1093.6	637.48		820.54		686.48	1	F1:7599	20150812RA rerun MIN6N8_AGE-BSA ALT Kd pooled.wiff	4	1	1	0	1	0	1	O88738			PEAKS DB
RYLELGKETL	22.7	1220.68	10	-5	611.342	50.01				140.19		58.095	6	F6:8762	20150812RA rerun MIN6N8_UT Kd pooled.wiff	2	0	0	0	1	0	1	P14431			PEAKS DB
KYNIMLVRL	22.64	1148.67	9	-0.2	575.344	62.37		299.64				394.4	6	F6:11184	20150812RA rerun MIN6N8_UT Kd pooled.wiff	2	0	1	0	0	0	1	P42932			PEAKS DB
RGGSGGGGVSSGGGS	22.58	1134.5	15	26.9	568.273	46.1						132.47	6	F6:8270	20150812RA rerun MIN6N8_UT Kd pooled.wiff	1	0	0	0	0	0	1	Q3TTY5			PEAKS DB
QYHTVAGSDI	22.55	1089.51	10	-3.5	545.758	36.96	73.05						1	F1:6744	20150812RA rerun MIN6N8_AGE-BSA ALT Kd pooled.wiff	1	1	0	0	0	0	0	E9Q3L2			PEAKS DB
AYNPMARDLF	22.47	1196.56	10	0.6	599.29	61.96				138.44			4	F4:10521	20150812RA rerun MIN6N8_BSA Kd pooled.wiff	1	0	0	0	1	0	0	Q9JLN9			PEAKS DB
VHRLVNDL	22.45	964.545	8	-23.4	483.269	62.77						3453.2	6	F6:11271	20150812RA rerun MIN6N8_UT Kd pooled.wiff	1	0	0	0	0	0	1	Q924Z6			PEAKS DB
SYAM(+15.99)ANTGI	22.41	942.412	9	2.2	472.214	38.29		0				0	2	F2:6911	20150812RA rerun MIN6N8_AGE-BSA Kd pooled.wiff	0	0	0	0	0	0	0	Q8CFE6	Oxidation (M)	M4:Oxidation (M):1000.00	PEAKS DB
TYSEIVGTDI	22.31	1096.53	10	2.1	549.273	58.48						226.73	6	F6:10220	20150812RA rerun MIN6N8_UT Kd pooled.wiff	1	0	0	0	0	0	1	Q8CFE6			PEAKS DB
KYDPINSML	22.28	1079.53	9	-0.2	540.773	56.87	381.81			946.63	798.11	1322.8	4	F4:9548	20150812RA rerun MIN6N8_BSA Kd pooled.wiff	4	1	0	0	1	1	1	Q91VC9			PEAKS DB
LYEAVREVL	22.2	1090.6	9	-3.1	546.304	56.78			87.054				3	F3:9449	20150812RA rerun MIN6N8_BSA ALT Kd pooled.wiff	1	0	0	1	0	0	0	P53026			PEAKS DB
SYLPAANRL	22.19	1003.54	9	2.3	502.779	49.3	3154.8	2690.9			1436.2		1	F1:8017	20150812RA rerun MIN6N8_AGE-BSA ALT Kd pooled.wiff	3	1	1	0	0	1	0	Q9EQT6			PEAKS DB
SYFPE(+21.98)ITHI	22.12	1127.53	9	-0.1	564.77	65.94		232.99					2	F2:11947	20150812RA rerun MIN6N8_AGE-BSA Kd pooled.wiff	1	0	1	0	0	0	0	P52332	Sodium adduct	E5:Sodium adduct:17.65	PEAKS PTM
VYLPTHTSLL	22.1	1142.63	10	-0.6	572.324	60.07		1391.2	309.91	887.26	456.49		4	F4:10164	20150812RA rerun MIN6N8_BSA Kd pooled.wiff	4	0	1	1	1	1	0	Q8BM54			PEAKS DB
RYQEVIQEL	22.1	1176.61	9	0.7	589.315	53.41	156.77			228.7		344.77	4	F4:8831	20150812RA rerun MIN6N8_BSA Kd pooled.wiff	3	1	0	0	1	0	1	Q5DU37			PEAKS DB
DYLPDRELV	22.07	1118.56	9	-15.6	560.279	57.02	585.79	1491.8		929.01			2	F2:9649	20150812RA rerun MIN6N8_AGE-BSA Kd pooled.wiff	3	1	1	0	1	0	0	Q5SW75			PEAKS DB
FVNPQLLSI	21.99	1029.59	9	0.2	515.798	61.2	1561.3	2666.1				2490.8	1	F1:10283	20150812RA rerun MIN6N8_AGE-BSA ALT Kd pooled.wiff	3	1	1	0	0	0	1	B2RX12			PEAKS DB
SYREGLTPVL	21.9	1133.61	10	1	567.809	53.55			281.74			1660.4	3	F3:9193	20150812RA rerun MIN6N8_BSA ALT Kd pooled.wiff	2	0	0	1	0	0	1	Q80XE1			PEAKS DB
IYSEVATLI	21.84	1007.55	9	3.2	504.784	69.85			379.62		638.01		3	F3:10801	20150812RA rerun MIN6N8_BSA ALT Kd pooled.wiff	2	0	0	1	0	1	0	Q9R0L6			PEAKS DB
SYFEIPTKEF	21.77	1259.61	10	-0.6	630.811	66.99		233.08	25.507	76.325		154.46	6	F6:12264	20150812RA rerun MIN6N8_UT Kd pooled.wiff	4	0	1	1	1	0	1	Q6A065			PEAKS DB
SYRQLLEEL	21.77	1149.6	9	-1.1	575.808	68.31						49.033	6	F6:12527	20150812RA rerun MIN6N8_UT Kd pooled.wiff	1	0	0	0	0	0	1	Q9Z2W8			PEAKS DB
RYQEALSEL	21.74	1107.56	9	4.5	554.788	49.83		975.6		916.82		350.79	4	F4:8203	20150812RA rerun MIN6N8_BSA Kd pooled.wiff	3	0	1	0	1	0	1	Q8R092			PEAKS DB
EVEDPQVEQLELGGSPGDLQT	21.71	2239.05	21	2.7	747.356	64.86	577.58					1312	1	F1:10920	20150812RA rerun MIN6N8_AGE-BSA ALT Kd pooled.wiff	2	1	0	0	0	0	1	P01325			PEAKS DB
GYASSMWTI	21.65	1014.45	9	1.6	508.23	71.83	512.88		334.23			1295.1	1	F1:11894	20150812RA rerun MIN6N8_AGE-BSA ALT Kd pooled.wiff	3	1	0	1	0	0	1	P21661			PEAKS DB
INTIPAPSAPV	21.6	1078.6	11	1.3	540.307	55.83	596.14						1	F1:9318	20150812RA rerun MIN6N8_AGE-BSA ALT Kd pooled.wiff	1	1	0	0	0	0	0	Q8BZ52			PEAKS DB
GYIASLHEL	21.52	1001.52	9	3.1	501.768	56.56		317.53				198.34	2	F2:9591	20150812RA rerun MIN6N8_AGE-BSA Kd pooled.wiff	2	0	1	0	0	0	1	Q920R0			PEAKS DB
SFLPSGSEI	21.43	935.46	9	0.9	468.738	62.51	1018.7	1872.2				1629.4	2	F2:11121	20150812RA rerun MIN6N8_AGE-BSA Kd pooled.wiff	3	1	1	0	0	0	1	Q9JKC7			PEAKS DB
LPNKQVL	21.42	810.496	7	-0.4	406.254	48.67	272.43						1	F1:7890	20150812RA rerun MIN6N8_AGE-BSA ALT Kd pooled.wiff	1	1	0	0	0	0	0	Q05915			PEAKS DB
IYRELEQSI	21.42	1149.6	9	-6.6	575.805	49.77	447.83			332.48	0		4	F4:8204	20150812RA rerun MIN6N8_BSA Kd pooled.wiff	2	1	0	0	1	0	0	Q9WVE8			PEAKS DB
VYQNIFTAM(+15.99)	21.32	1101.52	9	3.1	551.767	57.88		184.13					2	F2:9954	20150812RA rerun MIN6N8_AGE-BSA Kd pooled.wiff	1	0	1	0	0	0	0	P21279	Oxidation (M)	M9:Oxidation (M):1000.00	PEAKS DB
SSYWLVRTEL	21.32	1252.65	10	0	627.33	67.45	0	97.355				62.859	6	F6:12368	20150812RA rerun MIN6N8_UT Kd pooled.wiff	2	0	1	0	0	0	1	P42859			PEAKS DB
AFGGGLLSPGPE	21.31	1100.55	12	15.3	551.291	59.25		6502.9					2	F2:10436	20150812RA rerun MIN6N8_AGE-BSA Kd pooled.wiff	1	0	1	0	0	0	0	Q04863			PEAKS DB
KLAPNLTEL	21.26	997.581	9	-5.1	499.795	54.26				148.38	64.127	176.4	4	F4:9053	20150812RA rerun MIN6N8_BSA Kd pooled.wiff	3	0	0	0	1	1	1	P70208			PEAKS DB
AGPSGAAGPPGPK	21.18	1062.55	13	7.1	532.284	67.12					0		5	F5:12562	20150812RA rerun MIN6N8_Recon ALT Kd pooled.wiff	0	0	0	0	0	0	0	O88207			PEAKS DB
SYFKNNAYL	21.18	1118.54	9	2.2	560.278	51.87			87.467			417.36	6	F6:9020	20150812RA rerun MIN6N8_UT Kd pooled.wiff	2	0	0	1	0	0	1	Q922B2			PEAKS DB
YLDVKQRL	21.04	1033.59	8	-1	517.803	45.67				118.61			4	F4:7648	20150812RA rerun MIN6N8_BSA Kd pooled.wiff	1	0	0	0	1	0	0	P61222			PEAKS DB
SYM(+15.99)PTVSHL	21.01	1049.49	9	11	525.756	42.08	107.94	0				20.018	2	F2:7200	20150812RA rerun MIN6N8_AGE-BSA Kd pooled.wiff	2	1	0	0	0	0	1	Q9Z2E9	Oxidation (M)	M3:Oxidation (M):1000.00	PEAKS DB
SYLPQDPSRTV	20.97	1261.63	11	6.5	631.827	45.72				133.12			4	F4:7626	20150812RA rerun MIN6N8_BSA Kd pooled.wiff	1	0	0	0	1	0	0	Q925B0			PEAKS DB
QYQQIINRL	20.93	1174.65	9	2.3	588.332	53.92				79.585		97.555	4	F4:8987	20150812RA rerun MIN6N8_BSA Kd pooled.wiff	2	0	0	0	1	0	1	Q5I1X5			PEAKS DB
KYFEVPSVLL	20.89	1193.67	10	-0.8	597.842	74.31				267.03			4	F4:12080	20150812RA rerun MIN6N8_BSA Kd pooled.wiff	1	0	0	0	1	0	0	Q9QZB7			PEAKS DB
TYQDIQNTI	20.86	1094.52	9	-0.5	548.269	50.32		2997.5	878.61				2	F2:8265	20150812RA rerun MIN6N8_AGE-BSA Kd pooled.wiff	2	0	1	1	0	0	0	P08775			PEAKS DB
SYQNMLRII	20.85	1136.6	9	4.2	569.31	67.48						0	6	F6:12364	20150812RA rerun MIN6N8_UT Kd pooled.wiff	0	0	0	0	0	0	0	Q3TCN2			PEAKS DB
SYSM(+15.99)PLTSI	20.83	1013.47	9	-0.3	507.744	55.44					52.339		5	F5:10219	20150812RA rerun MIN6N8_Recon ALT Kd pooled.wiff	1	0	0	0	0	1	0	Q6PDX6	Oxidation (M)	M4:Oxidation (M):1000.00	PEAKS DB
PYFPANQEI	20.83	1077.51	9	0.9	539.764	57.67	427.9			447.47			4	F4:9738	20150812RA rerun MIN6N8_BSA Kd pooled.wiff	2	1	0	0	1	0	0	P28650			PEAKS DB
AANTQPGLAM	20.79	972.47	10	21.7	487.253	59.57					0		5	F5:10951	20150812RA rerun MIN6N8_Recon ALT Kd pooled.wiff	0	0	0	0	0	0	0	Q9ESE1			PEAKS DB
KYFPSRVSI	20.78	1095.61	9	1.2	548.812	46.57				2042.6			4	F4:7715	20150812RA rerun MIN6N8_BSA Kd pooled.wiff	1	0	0	0	1	0	0	Q6PEB6			PEAKS DB
GYIQQINNL	20.73	1061.55	9	1.7	531.783	59.44				456.97		779.92	4	F4:10023	20150812RA rerun MIN6N8_BSA Kd pooled.wiff	2	0	0	0	1	0	1	Q6PCX9			PEAKS DB
VPGFAHI	20.73	739.402	7	0.4	370.708	59.13		1164					2	F2:10268	20150812RA rerun MIN6N8_AGE-BSA Kd pooled.wiff	1	0	1	0	0	0	0	Q9CXX9			PEAKS DB
SYQPIVDYI	20.73	1096.54	9	47.7	549.303	71.31		255.13	0				3	F3:10915	20150812RA rerun MIN6N8_BSA ALT Kd pooled.wiff	1	0	1	0	0	0	0	Q8C650			PEAKS DB
TYIDDITVI	20.72	1051.54	9	0.8	526.779	71.44		0					2	F2:12841	20150812RA rerun MIN6N8_AGE-BSA Kd pooled.wiff	0	0	0	0	0	0	0	P12265			PEAKS DB
KYQDSLQSI	20.64	1080.55	9	1.2	541.278	43.95	1309.3			770.88			1	F1:7228	20150812RA rerun MIN6N8_AGE-BSA ALT Kd pooled.wiff	2	1	0	0	1	0	0	Q6ZWR6			PEAKS DB
SYQDLASQI	20.55	1023.49	9	-0.3	512.751	56.53	684.43				293.18		5	F5:10402	20150812RA rerun MIN6N8_Recon ALT Kd pooled.wiff	2	1	0	0	0	1	0	P48410			PEAKS DB
YIHGPKGNEI	20.51	1126.58	10	4.7	564.296	42.25	88.638						1	F1:7114	20150812RA rerun MIN6N8_AGE-BSA ALT Kd pooled.wiff	1	1	0	0	0	0	0	Q6P5D8			PEAKS DB
SFVNTMTSL	20.46	998.474	9	3.5	500.246	66.48		1470.2			1495.5		5	F5:12449	20150812RA rerun MIN6N8_Recon ALT Kd pooled.wiff	2	0	1	0	0	1	0	P28660			PEAKS DB
IEEVEEKRK(+114.04)	20.45	1272.67	9	-35.3	637.316	42.93	102.29					47.013	1	F1:7151	20150812RA rerun MIN6N8_AGE-BSA ALT Kd pooled.wiff	2	1	0	0	0	0	1	Q0VGU4	Ubiquitin	K9:Ubiquitin:20.41	PEAKS PTM
PAGKGYG	20.41	648.323	7	-2.7	649.329	56.55		0					2	F2:9619	20150812RA rerun MIN6N8_AGE-BSA Kd pooled.wiff	0	0	0	0	0	0	0	Q45VK7			PEAKS DB
EYQEIITEL	20.4	1136.56	9	20.8	569.299	68.99					854.94	3376.8	6	F6:12622	20150812RA rerun MIN6N8_UT Kd pooled.wiff	2	0	0	0	0	1	1	Q6RT24			PEAKS DB
YYLHVQSM(+15.99)L	20.39	1168.56	9	-2.9	585.285	54.58		462.37		223.21			2	F2:9207	20150812RA rerun MIN6N8_AGE-BSA Kd pooled.wiff	2	0	1	0	1	0	0	Q3UMB5	Oxidation (M)	M8:Oxidation (M):1000.00	PEAKS DB
KYEPIFQDI	20.36	1151.59	9	-0.1	576.798	63.29	0	0	0			161.82	3	F3:10150	20150812RA rerun MIN6N8_BSA ALT Kd pooled.wiff	1	0	0	0	0	0	1	Q64700			PEAKS DB
KYWEMMPPNI	20.27	1307.6	10	2.8	654.811	67.91		301.43					2	F2:12255	20150812RA rerun MIN6N8_AGE-BSA Kd pooled.wiff	1	0	1	0	0	0	0	Q6DFV1			PEAKS DB
YYQSGRMLL	20.27	1129.56	9	0.6	565.787	53.36				243.78		584.57	6	F6:9244	20150812RA rerun MIN6N8_UT Kd pooled.wiff	2	0	0	0	1	0	1	P55096			PEAKS DB
SFHPSGDFI	20.23	1005.46	9	-3.3	503.733	54.08					284.09		5	F5:10014	20150812RA rerun MIN6N8_Recon ALT Kd pooled.wiff	1	0	0	0	0	1	0	Q99LC2			PEAKS DB
SYLKLMTEL	20.22	1096.58	9	-4.9	549.297	70.73		95.872					2	F2:12785	20150812RA rerun MIN6N8_AGE-BSA Kd pooled.wiff	1	0	1	0	0	0	0	Q8R5K2			PEAKS DB
IYM(+15.99)EIIHNL	20.17	1160.59	9	-0.6	581.299	57.96			44.825				3	F3:9544	20150812RA rerun MIN6N8_BSA ALT Kd pooled.wiff	1	0	0	1	0	0	0	Q9DC23	Oxidation (M)	M3:Oxidation (M):1000.00	PEAKS DB
VYGSLASVL	20.17	907.501	9	-2.6	454.757	68.82						439.44	6	F6:12676	20150812RA rerun MIN6N8_UT Kd pooled.wiff	1	0	0	0	0	0	1	Q8JZK9			PEAKS DB
YYQGVIQQI	20.17	1110.57	9	0.9	556.291	58.82	283.86		123.24				3	F3:9612	20150812RA rerun MIN6N8_BSA ALT Kd pooled.wiff	2	1	0	1	0	0	0	Q8K0T4			PEAKS DB
TYQENLTDL	20.15	1095.51	9	-0.3	548.759	55.89	704.48						1	F1:9239	20150812RA rerun MIN6N8_AGE-BSA ALT Kd pooled.wiff	1	1	0	0	0	0	0	Q9EPW0			PEAKS DB
KFSLGVSAL	20.12	920.533	9	0.4	461.274	54.32				57.696			4	F4:9050	20150812RA rerun MIN6N8_BSA Kd pooled.wiff	1	0	0	0	1	0	0	Q5F201			PEAKS DB
SYATLLHVL	19.94	1015.57	9	-31.1	508.775	68.47	330.49						1	F1:11514	20150812RA rerun MIN6N8_AGE-BSA ALT Kd pooled.wiff	1	1	0	0	0	0	0	Q5U431			PEAKS DB
HYLDTTTLI	19.93	1075.55	9	-3.4	538.783	57.48		902.97					2	F2:9831	20150812RA rerun MIN6N8_AGE-BSA Kd pooled.wiff	1	0	1	0	0	0	0	P47941			PEAKS DB
YSIKTEDSL	19.89	1054.52	9	-7.5	528.26	55.55			0				3	F3:9360	20150812RA rerun MIN6N8_BSA ALT Kd pooled.wiff	0	0	0	0	0	0	0	O08575			PEAKS DB
HYLLDRDFL	19.8	1190.61	9	7.4	596.313	62.67			66.527			192.04	3	F3:10064	20150812RA rerun MIN6N8_BSA ALT Kd pooled.wiff	2	0	0	1	0	0	1	Q8CIP5			PEAKS DB
SYLDTQVGHVL	19.79	1230.62	11	15.7	616.329	59.05				50.573		0	6	F6:10383	20150812RA rerun MIN6N8_UT Kd pooled.wiff	1	0	0	0	1	0	0	Q08890			PEAKS DB
TYITWIDKY	19.79	1201.6	9	37.6	601.831	57.72					69.623	219.07	5	F5:10601	20150812RA rerun MIN6N8_Recon ALT Kd pooled.wiff	2	0	0	0	0	1	1	Q9JHU4			PEAKS DB
PYIPFFATF	19.76	1101.55	9	-33.4	551.763	57.8			47.957				3	F3:9533	20150812RA rerun MIN6N8_BSA ALT Kd pooled.wiff	1	0	0	1	0	0	0	O09165			PEAKS DB
SFNEAM(+15.99)TQI	19.76	1055.46	9	-1.4	528.736	45.43		514.4				384.11	6	F6:8153	20150812RA rerun MIN6N8_UT Kd pooled.wiff	2	0	1	0	0	0	1	Q922S8	Oxidation (M)	M6:Oxidation (M):1000.00	PEAKS DB
TYITWIDK	19.72	1038.54	8	35.7	520.295	51.56		2834.6				2827.1	2	F2:8479	20150812RA rerun MIN6N8_AGE-BSA Kd pooled.wiff	2	0	1	0	0	0	1	Q9JHU4			PEAKS DB
RYTESISMV	19.69	1084.52	9	3.7	543.268	47.14	115						1	F1:7589	20150812RA rerun MIN6N8_AGE-BSA ALT Kd pooled.wiff	1	1	0	0	0	0	0	O35657			PEAKS DB
SYAEQLSM(+15.99)L	19.64	1056.48	9	6	529.248	59.03	425.4						1	F1:9896	20150812RA rerun MIN6N8_AGE-BSA ALT Kd pooled.wiff	1	1	0	0	0	0	0	E9Q7G0	Oxidation (M)	M8:Oxidation (M):1000.00	PEAKS DB
SFLNVRNWI	19.52	1147.61	9	-1.8	574.813	77.13		226.6				146.78	6	F6:13917	20150812RA rerun MIN6N8_UT Kd pooled.wiff	2	0	1	0	0	0	1	Q9ERI2			PEAKS DB
KGDVTITNDGAT	19.51	1190.58	12	20.6	596.308	62.7					72.934		5	F5:11581	20150812RA rerun MIN6N8_Recon ALT Kd pooled.wiff	1	0	0	0	0	1	0	P80315			PEAKS DB
AGARGGA(+21.98)	19.51	580.269	7	32.6	581.295	63.46					0		5	F5:11774	20150812RA rerun MIN6N8_Recon ALT Kd pooled.wiff	0	0	0	0	0	0	0	Q791T5	Sodium adduct	A7:Sodium adduct:1000.00	PEAKS PTM
FENNVASLYL	19.5	1168.58	10	26.6	585.311	57.57		0					2	F2:9868	20150812RA rerun MIN6N8_AGE-BSA Kd pooled.wiff	0	0	0	0	0	0	0	A2ASS6			PEAKS DB
PKQSALPAHV	19.46	1046.59	10	-30.7	524.285	58.68						0	6	F6:10291	20150812RA rerun MIN6N8_UT Kd pooled.wiff	0	0	0	0	0	0	0	Q61207			PEAKS DB
VYGAMHVEI	19.45	1017.5	9	-1.4	509.754	54.72		151.97		138.38	99.507		4	F4:9136	20150812RA rerun MIN6N8_BSA Kd pooled.wiff	3	0	1	0	1	1	0	Q5SW19			PEAKS DB
SGQLGLPDEEN	19.43	1157.52	11	-5.6	579.764	46.21						193.75	6	F6:8282	20150812RA rerun MIN6N8_UT Kd pooled.wiff	1	0	0	0	0	0	1	Q03517			PEAKS DB
EYVANLTEL	19.36	1050.52	9	1.1	526.269	64.52	1301.1			1843.5			4	F4:10950	20150812RA rerun MIN6N8_BSA Kd pooled.wiff	2	1	0	0	1	0	0	Q3TKT4			PEAKS DB
YSITVKEL	19.36	951.528	8	7.2	476.774	53.75					0		5	F5:9959	20150812RA rerun MIN6N8_Recon ALT Kd pooled.wiff	0	0	0	0	0	0	0	Q9EPN1			PEAKS DB
EVEDPQVAQLELGGGPGAGDLQTL	19.35	2392.18	24	-1.2	798.398	74.21						88.656	6	F6:13366	20150812RA rerun MIN6N8_UT Kd pooled.wiff	1	0	0	0	0	0	1	P01326			PEAKS DB
AYIPLNNYL	19.34	1079.57	9	-3	540.788	72.86		317.97		143.38			4	F4:12003	20150812RA rerun MIN6N8_BSA Kd pooled.wiff	2	0	1	0	1	0	0	Q8C878			PEAKS DB
YYVYTQQEL	19.32	1205.56	9	-1.3	603.784	56.28	186.51						1	F1:9336	20150812RA rerun MIN6N8_AGE-BSA ALT Kd pooled.wiff	1	1	0	0	0	0	0	B2RY04			PEAKS DB
YYLQTQDPI	19.28	1139.55	9	-23.4	570.769	51.69				26.133			4	F4:8531	20150812RA rerun MIN6N8_BSA Kd pooled.wiff	1	0	0	0	1	0	0	Q5RJH6			PEAKS DB
SYNQGIVVI	19.27	991.534	9	-2.4	496.773	61.68						238.73	6	F6:11022	20150812RA rerun MIN6N8_UT Kd pooled.wiff	1	0	0	0	0	0	1	Q5NCX5			PEAKS DB
LYIDSRQSL	19.27	1093.58	9	3.3	547.798	48.19				291.07			4	F4:7945	20150812RA rerun MIN6N8_BSA Kd pooled.wiff	1	0	0	0	1	0	0	Q8BUR3			PEAKS DB
DYQPGITYI	19.22	1068.51	9	0.2	535.264	61.97		949.6				1157.5	6	F6:11059	20150812RA rerun MIN6N8_UT Kd pooled.wiff	2	0	1	0	0	0	1	Q8CJG1:Q8CJF9			PEAKS DB
GYLALVSAL	19.22	905.522	9	6.8	453.772	81.38						72.239	6	F6:14369	20150812RA rerun MIN6N8_UT Kd pooled.wiff	1	0	0	0	0	0	1	P12382			PEAKS DB
SSNNLGPVLPPTNVGSNTY(-.98)	19.17	1928.96	19	-1.5	965.486	58.51		4396.9					2	F2:10183	20150812RA rerun MIN6N8_AGE-BSA Kd pooled.wiff	1	0	1	0	0	0	0	P12968	Amidation	Y19:Amidation:1000.00	PEAKS PTM
YSTLMTHL	19.07	964.469	8	-37.1	483.222	65.9	0						1	F1:11149	20150812RA rerun MIN6N8_AGE-BSA ALT Kd pooled.wiff	0	0	0	0	0	0	0	Q09M05			PEAKS DB
EYIHALTLL	19.02	1071.6	9	2.4	536.807	70.32		367.18					2	F2:12735	20150812RA rerun MIN6N8_AGE-BSA Kd pooled.wiff	1	0	1	0	0	0	0	O35382			PEAKS DB
KYNEVTATYL	18.97	1200.6	10	-7.1	601.304	49.42		151.36					2	F2:8049	20150812RA rerun MIN6N8_AGE-BSA Kd pooled.wiff	1	0	1	0	0	0	0	Q8CIP4			PEAKS DB
KYQEALSYL	18.94	1113.57	9	0.6	557.793	56.99		748.66		422.73			4	F4:9589	20150812RA rerun MIN6N8_BSA Kd pooled.wiff	2	0	1	0	1	0	0	Q5I043			PEAKS DB
LLVYKGGELI	18.94	1103.66	10	-24.6	552.823	76.11				227.3			4	F4:12211	20150812RA rerun MIN6N8_BSA Kd pooled.wiff	1	0	0	0	1	0	0	Q9QW08			PEAKS DB
QYQIIM(+15.99)TMI	18.86	1155.57	9	-4.2	578.788	70.44		391.21					2	F2:12752	20150812RA rerun MIN6N8_AGE-BSA Kd pooled.wiff	1	0	1	0	0	0	0	Q9Z0R9	Oxidation (M)	M6:Oxidation (M):32.28	PEAKS DB
SYNPITNEWL	18.85	1235.58	10	-2.7	618.797	73.71		190.62					2	F2:13102	20150812RA rerun MIN6N8_AGE-BSA Kd pooled.wiff	1	0	1	0	0	0	0	Q8BFQ9			PEAKS DB
AYQVCGSPLY	18.82	1099.5	10	17.3	550.767	56.7					77.643		5	F5:10428	20150812RA rerun MIN6N8_Recon ALT Kd pooled.wiff	1	0	0	0	0	1	0	O70372			PEAKS DB
YYLTWKTSI	18.82	1173.61	9	1.7	587.812	65.51		208.61			195.03		5	F5:12261	20150812RA rerun MIN6N8_Recon ALT Kd pooled.wiff	2	0	1	0	0	1	0	Q7TQA1			PEAKS DB
FAEGLYHF	18.71	982.455	8	0.3	492.233	61.26	50.944		22.023				1	F1:10312	20150812RA rerun MIN6N8_AGE-BSA ALT Kd pooled.wiff	2	1	0	1	0	0	0	P21661			PEAKS DB
KLSLLLSEI	18.69	1014.63	9	-2.9	508.322	73.6		27.31					2	F2:13095	20150812RA rerun MIN6N8_AGE-BSA Kd pooled.wiff	1	0	1	0	0	0	0	Q3UA06			PEAKS DB
GYLSSERLI	18.67	1036.56	9	-0.7	519.284	55.18						208.07	6	F6:9548	20150812RA rerun MIN6N8_UT Kd pooled.wiff	1	0	0	0	0	0	1	P26040			PEAKS DB
SFHVSGTWL	18.67	1032.5	9	1.2	517.257	65.32	175.98						1	F1:11018	20150812RA rerun MIN6N8_AGE-BSA ALT Kd pooled.wiff	1	1	0	0	0	0	0	Q5SUQ9			PEAKS DB
SYWSVGETI	18.66	1040.48	9	-1.2	521.245	67.06			156.64				3	F3:10545	20150812RA rerun MIN6N8_BSA ALT Kd pooled.wiff	1	0	0	1	0	0	0	Q78IS1			PEAKS DB
FSGLEGAFGTV	18.63	1083.52	11	1.1	542.77	65.71		1154.1					2	F2:11831	20150812RA rerun MIN6N8_AGE-BSA Kd pooled.wiff	1	0	1	0	0	0	0	Q8VHN7			PEAKS DB
HSFGDLTGPSPAQ	18.6	1312.6	13	3.6	657.312	44.81				0			4	F4:7517	20150812RA rerun MIN6N8_BSA Kd pooled.wiff	0	0	0	0	0	0	0	Q60673			PEAKS DB
MSTPIE(+21.98)VLC	18.52	1013.45	9	23.3	507.744	55.37	186.83						1	F1:9145	20150812RA rerun MIN6N8_AGE-BSA ALT Kd pooled.wiff	1	1	0	0	0	0	0	Q9JMK2:Q9DC28	Sodium adduct	E6:Sodium adduct:5.77	PEAKS PTM
YYIIQHKPKN	18.51	1302.71	10	-35.7	652.336	62.29	2416.4						1	F1:10455	20150812RA rerun MIN6N8_AGE-BSA ALT Kd pooled.wiff	1	1	0	0	0	0	0	Q64487			PEAKS DB
TYVHSSATI	18.5	977.482	9	-1.4	489.746	34.17	32.628						1	F1:6408	20150812RA rerun MIN6N8_AGE-BSA ALT Kd pooled.wiff	1	1	0	0	0	0	0	Q8BGQ7			PEAKS DB
GYVQSKEM(+15.99)I	18.48	1069.51	9	8.2	535.767	34.66				1.0412			4	F4:6651	20150812RA rerun MIN6N8_BSA Kd pooled.wiff	1	0	0	0	1	0	0	P14685	Oxidation (M)	M8:Oxidation (M):1000.00	PEAKS DB
DYQPGITFI	18.43	1052.52	9	3.3	527.265	71.9	796.05		638.57				3	F3:10960	20150812RA rerun MIN6N8_BSA ALT Kd pooled.wiff	2	1	0	1	0	0	0	Q8CJG0			PEAKS DB
IYHGLATLL	18.42	999.575	9	1.8	500.796	65.88		677.78					2	F2:11923	20150812RA rerun MIN6N8_AGE-BSA Kd pooled.wiff	1	0	1	0	0	0	0	Q9QZQ1			PEAKS DB
LHGKLFGLED	18.3	1127.6	10	-29.4	564.789	51.81				81.08			4	F4:8555	20150812RA rerun MIN6N8_BSA Kd pooled.wiff	1	0	0	0	1	0	0	Q8BX37			PEAKS DB
SYLEM(+15.99)GHDI	18.29	1079.46	9	2.5	540.738	43.01						96.492	6	F6:7967	20150812RA rerun MIN6N8_UT Kd pooled.wiff	1	0	0	0	0	0	1	P08775	Oxidation (M)	M5:Oxidation (M):1000.00	PEAKS DB
TSQMSEGPGDP	18.27	1104.44	11	3.6	553.229	57.55		0					2	F2:9865	20150812RA rerun MIN6N8_AGE-BSA Kd pooled.wiff	0	0	0	0	0	0	0	Q52KG5			PEAKS DB
SYSQLITLV	18.19	1022.56	9	0.5	512.288	75.33	160.46						1	F1:12145	20150812RA rerun MIN6N8_AGE-BSA ALT Kd pooled.wiff	1	1	0	0	0	0	0	Q6PAR5			PEAKS DB
SYVLTRVGL	18.19	1006.58	9	-0.4	504.298	58.28		179.68		0			2	F2:10023	20150812RA rerun MIN6N8_AGE-BSA Kd pooled.wiff	1	0	1	0	0	0	0	Q8R3I3			PEAKS DB
PEAGVATTDL	18.18	972.476	10	33.8	487.262	68.97					0		5	F5:12857	20150812RA rerun MIN6N8_Recon ALT Kd pooled.wiff	0	0	0	0	0	0	0	P21661			PEAKS DB
VEDPQVAQLELGGGPGAGDLQT	18.14	2150.05	22	-0.2	717.69	64.77						360	6	F6:11790	20150812RA rerun MIN6N8_UT Kd pooled.wiff	1	0	0	0	0	0	1	P01326			PEAKS DB
KYEELLQVI	18.12	1133.63	9	-3.3	567.822	68.37						414.12	6	F6:12545	20150812RA rerun MIN6N8_UT Kd pooled.wiff	1	0	0	0	0	0	1	P97478			PEAKS DB
YYQSGRM(+15.99)LL	18.02	1145.55	9	2	573.785	45.38				207.05			4	F4:7584	20150812RA rerun MIN6N8_BSA Kd pooled.wiff	1	0	0	0	1	0	0	P55096	Oxidation (M)	M7:Oxidation (M):1000.00	PEAKS DB
YWVTSISMV	18	1084.53	9	-5	543.268	47.3						74.022	6	F6:8386	20150812RA rerun MIN6N8_UT Kd pooled.wiff	1	0	0	0	0	0	1	Q8BLX4			PEAKS DB
IPEQVLDS	17.98	899.46	8	29.5	450.75	48.81				437.59			4	F4:8014	20150812RA rerun MIN6N8_BSA Kd pooled.wiff	1	0	0	0	1	0	0	P17012			PEAKS DB
AGGVNVT	17.91	616.318	7	-26.6	617.309	57.78					17.589		5	F5:10634	20150812RA rerun MIN6N8_Recon ALT Kd pooled.wiff	1	0	0	0	0	1	0	Q2KN98			PEAKS DB
VYQSMKEEL	17.91	1125.54	9	1.5	563.777	41.74	0			144.96			4	F4:7317	20150812RA rerun MIN6N8_BSA Kd pooled.wiff	1	0	0	0	1	0	0	Q9WVF7			PEAKS DB
TYHEVVDEI	17.86	1103.51	9	3.4	552.764	47.08	125.58						1	F1:7580	20150812RA rerun MIN6N8_AGE-BSA ALT Kd pooled.wiff	1	1	0	0	0	0	0	Q80SY5			PEAKS DB
RYLPGETFV	17.85	1080.56	9	-2.6	541.286	54.83				201.04			4	F4:9139	20150812RA rerun MIN6N8_BSA Kd pooled.wiff	1	0	0	0	1	0	0	Q8K214			PEAKS DB
SYMGIRDTEL	17.79	1183.55	10	0.4	592.785	53.53						305.48	6	F6:9258	20150812RA rerun MIN6N8_UT Kd pooled.wiff	1	0	0	0	0	0	1	Q9Z0G0			PEAKS DB
KYDEVLHM(+15.99)V	17.79	1148.55	9	-5.2	575.281	41.03		22.312					2	F2:7133	20150812RA rerun MIN6N8_AGE-BSA Kd pooled.wiff	1	0	1	0	0	0	0	Q8CIE6	Oxidation (M)	M8:Oxidation (M):1000.00	PEAKS DB
HFLPVKTIL	17.79	1066.65	9	-0.1	534.334	57.9				136.18			4	F4:9726	20150812RA rerun MIN6N8_BSA Kd pooled.wiff	1	0	0	0	1	0	0	P20060			PEAKS DB
TPGKRRN	17.79	827.472	7	45.6	414.761	62.51	371.67						1	F1:10518	20150812RA rerun MIN6N8_AGE-BSA ALT Kd pooled.wiff	1	1	0	0	0	0	0	P49290			PEAKS DB
AGVISKG	17.75	630.37	7	-35.1	631.355	64.34					0		5	F5:11978	20150812RA rerun MIN6N8_Recon ALT Kd pooled.wiff	0	0	0	0	0	0	0	A2ASS6			PEAKS DB
RYIANTVEL	17.75	1077.58	9	8.9	539.801	49.52	388.13						1	F1:8120	20150812RA rerun MIN6N8_AGE-BSA ALT Kd pooled.wiff	1	1	0	0	0	0	0	Q9DBG6			PEAKS DB
LVRSSNNLGPVLPPTNVGS(+162.05)NT	17.72	2297.19	21	12.5	766.746	55.73					942.56		5	F5:10272	20150812RA rerun MIN6N8_Recon ALT Kd pooled.wiff	1	0	0	0	0	1	0	P12968	Hexose (NSY)	S19:Hexose (NSY):0.00	PEAKS PTM
AYIQDHMLI	17.72	1102.55	9	4.7	552.284	60.36						104.96	6	F6:10691	20150812RA rerun MIN6N8_UT Kd pooled.wiff	1	0	0	0	0	0	1	Q0KK59			PEAKS DB
EIVGPHSQAG	17.68	993.488	10	-5.1	994.486	61.64	0						1	F1:10379	20150812RA rerun MIN6N8_AGE-BSA ALT Kd pooled.wiff	0	0	0	0	0	0	0	Q8BYK8			PEAKS DB
EVNEGELKE	17.67	1045.49	9	-29.1	523.738	62.19				445.59			4	F4:10547	20150812RA rerun MIN6N8_BSA Kd pooled.wiff	1	0	0	0	1	0	0	Q9QZC1			PEAKS DB
TYNNILTVL	17.67	1049.58	9	-0.6	525.795	77.15		2376.4					2	F2:13729	20150812RA rerun MIN6N8_AGE-BSA Kd pooled.wiff	1	0	1	0	0	0	0	Q9EQH3			PEAKS DB
SYLPSSSEYSL	17.6	1231.56	11	8.6	616.79	61.37			91.356				3	F3:9915	20150812RA rerun MIN6N8_BSA ALT Kd pooled.wiff	1	0	0	1	0	0	0	Q61586			PEAKS DB
QPMLQPYQ	17.59	1003.48	8	17.9	502.756	63.76		496.34					2	F2:11443	20150812RA rerun MIN6N8_AGE-BSA Kd pooled.wiff	1	0	1	0	0	0	0	E9Q0C6			PEAKS DB
QTGVSGGV	17.59	703.35	8	-45.9	704.325	57.85						0	6	F6:10095	20150812RA rerun MIN6N8_UT Kd pooled.wiff	0	0	0	0	0	0	0	Q64487			PEAKS DB
LHPSTPLKTL	17.58	1105.65	10	-11.3	553.826	69.52					111.7		5	F5:12926	20150812RA rerun MIN6N8_Recon ALT Kd pooled.wiff	1	0	0	0	0	1	0	Q8BRH0			PEAKS DB
NQGAFPEPL	17.57	971.471	9	5	972.483	76.52				0			4	F4:12260	20150812RA rerun MIN6N8_BSA Kd pooled.wiff	0	0	0	0	0	0	0	Q8K1K4			PEAKS DB
HAYIISYL	17.56	978.518	8	1.5	490.264	64.6			231.94				3	F3:10290	20150812RA rerun MIN6N8_BSA ALT Kd pooled.wiff	1	0	0	1	0	0	0	Q8BH64			PEAKS DB
KYLINLETL	17.55	1105.64	9	2.9	553.826	69.55	151						1	F1:11684	20150812RA rerun MIN6N8_AGE-BSA ALT Kd pooled.wiff	1	1	0	0	0	0	0	Q62120			PEAKS DB
VDKAGSPTLL	17.54	999.56	10	14.7	500.795	65.9				266.81			4	F4:11215	20150812RA rerun MIN6N8_BSA Kd pooled.wiff	1	0	0	0	1	0	0	Q3TDQ1			PEAKS DB
LFSLIGTSE	17.52	965.507	9	-2.6	966.512	70.44		149.07					2	F2:12763	20150812RA rerun MIN6N8_AGE-BSA Kd pooled.wiff	1	0	1	0	0	0	0	P0C5E4			PEAKS DB
VYNQLRASL	17.51	1062.58	9	-1.9	532.297	47.45	142.57					0	6	F6:8414	20150812RA rerun MIN6N8_UT Kd pooled.wiff	1	1	0	0	0	0	0	Q80TM9			PEAKS DB
IYLASKNLI	17.51	1033.62	9	-2.2	517.815	57.13		189.32					2	F2:9800	20150812RA rerun MIN6N8_AGE-BSA Kd pooled.wiff	1	0	1	0	0	0	0	A2A5R2			PEAKS DB
SYGDNIGGGQI	17.5	1079.49	11	35.1	540.768	47.48	4668.5						1	F1:7645	20150812RA rerun MIN6N8_AGE-BSA ALT Kd pooled.wiff	1	1	0	0	0	0	0	O35984			PEAKS DB
KGGYISLNYL	17.48	1126.6	10	-1	564.308	52.47		786.07					2	F2:8709	20150812RA rerun MIN6N8_AGE-BSA Kd pooled.wiff	1	0	1	0	0	0	0	Q6P1E8			PEAKS DB
TYQAMVHELL	17.47	1203.6	10	-2.2	602.802	65.78	198.86						1	F1:11120	20150812RA rerun MIN6N8_AGE-BSA ALT Kd pooled.wiff	1	1	0	0	0	0	0	P97390			PEAKS DB
GTLDVTITTL	17.41	1032.57	10	-27.3	517.278	66.7				244.15			4	F4:11307	20150812RA rerun MIN6N8_BSA Kd pooled.wiff	1	0	0	0	1	0	0	Q2WF71			PEAKS DB
VNPIMPGAYAL	17.37	1144.6	11	-31	573.287	71.64		0					2	F2:12859	20150812RA rerun MIN6N8_AGE-BSA Kd pooled.wiff	0	0	0	0	0	0	0	Q9WUB6			PEAKS DB
AYILGLITMA	17.32	1064.59	10	-6.2	533.299	62	5304.7				5402.5		1	F1:10410	20150812RA rerun MIN6N8_AGE-BSA ALT Kd pooled.wiff	2	1	0	0	0	1	0	Q8VEL0			PEAKS DB
EQNNLVLIPPS	17.32	1222.66	11	7.6	612.34	61.78						0	6	F6:11050	20150812RA rerun MIN6N8_UT Kd pooled.wiff	0	0	0	0	0	0	0	Q60751			PEAKS DB
NSIRNLDTI	17.28	1044.56	9	-1.8	523.283	46.23	0						1	F1:7484	20150812RA rerun MIN6N8_AGE-BSA ALT Kd pooled.wiff	0	0	0	0	0	0	0	P28658			PEAKS DB
VYVDGKEEI	17.26	1050.52	9	2.9	526.268	38.86	935.19	30.216			0		1	F1:6866	20150812RA rerun MIN6N8_AGE-BSA ALT Kd pooled.wiff	2	1	1	0	0	0	0	Q9WUD8			PEAKS DB
KYAVAIGSL	17.25	920.533	9	4.7	461.276	54.42						41.039	6	F6:9455	20150812RA rerun MIN6N8_UT Kd pooled.wiff	1	0	0	0	0	0	1	Q09143			PEAKS DB
VYLPLTSHI	17.25	1041.59	9	-3.3	521.798	62.85		230.33					2	F2:11251	20150812RA rerun MIN6N8_AGE-BSA Kd pooled.wiff	1	0	1	0	0	0	0	Q8CFD4			PEAKS DB
TYQQVQQTL	17.21	1107.56	9	-1.8	554.784	43.79				158.66			4	F4:7445	20150812RA rerun MIN6N8_BSA Kd pooled.wiff	1	0	0	0	1	0	0	Q91V81			PEAKS DB
DPNRESLDFL	17.18	1204.57	10	1	603.294	64.2						383.2	6	F6:11660	20150812RA rerun MIN6N8_UT Kd pooled.wiff	1	0	0	0	0	0	1	P12968			PEAKS DB
TALHQAAQQG	17.11	1023.51	10	9.6	512.767	57.62				1491.6			4	F4:9696	20150812RA rerun MIN6N8_BSA Kd pooled.wiff	1	0	0	0	1	0	0	G5E8K5			PEAKS DB
DITSVVITGL	17.08	1016.58	10	13.1	509.302	61.84				95.207			4	F4:10498	20150812RA rerun MIN6N8_BSA Kd pooled.wiff	1	0	0	0	1	0	0	O54750			PEAKS DB
YSCNTEIMPGI	17.08	1226.53	11	18.1	614.284	57.94				0			4	F4:9748	20150812RA rerun MIN6N8_BSA Kd pooled.wiff	0	0	0	0	0	0	0	Q7TPS5			PEAKS DB
AYLGMATGI	17.05	895.447	9	-2.5	448.73	62.7						84.834	6	F6:11327	20150812RA rerun MIN6N8_UT Kd pooled.wiff	1	0	0	0	0	0	1	Q8C145			PEAKS DB
IKNNLKDCGL	17	1116.6	10	-7.4	559.299	63.79			0				3	F3:10204	20150812RA rerun MIN6N8_BSA ALT Kd pooled.wiff	0	0	0	0	0	0	0	P08752			PEAKS DB
SFNEAMTQI	17	1039.46	9	0.4	520.74	57.26		1735.4				2093.3	2	F2:9780	20150812RA rerun MIN6N8_AGE-BSA Kd pooled.wiff	2	0	1	0	0	0	1	Q922S8			PEAKS DB
LFLKGIGLTL	16.97	1073.68	10	4.3	537.85	73.62			132.84				3	F3:11061	20150812RA rerun MIN6N8_BSA ALT Kd pooled.wiff	1	0	0	1	0	0	0	P33610			PEAKS DB
VYRELEQAI	16.96	1119.59	9	-4.2	560.801	50.11				432.03			4	F4:8277	20150812RA rerun MIN6N8_BSA Kd pooled.wiff	1	0	0	0	1	0	0	Q61644			PEAKS DB
SYGTILSHI	16.95	989.518	9	3.6	495.768	62.02						113.43	6	F6:11099	20150812RA rerun MIN6N8_UT Kd pooled.wiff	1	0	0	0	0	0	1	Q3V129			PEAKS DB
AGPLGDT	16.91	629.302	7	31.4	630.329	68.98				0			4	F4:11654	20150812RA rerun MIN6N8_BSA Kd pooled.wiff	0	0	0	0	0	0	0	O70306			PEAKS DB
SYNPLWLRI	16.82	1160.63	9	3.9	581.327	75.12		322.15				311.41	6	F6:13452	20150812RA rerun MIN6N8_UT Kd pooled.wiff	2	0	1	0	0	0	1	Q8CJ27			PEAKS DB
QYQIIMTM(+15.99)I	16.76	1155.57	9	-0.7	578.79	69.15		858.06		0			4	F4:11676	20150812RA rerun MIN6N8_BSA Kd pooled.wiff	1	0	1	0	0	0	0	Q9Z0R9	Oxidation (M)	M8:Oxidation (M):48.87	PEAKS DB
VYKDLLTSL	16.75	1050.6	9	0.6	526.303	65.11			206.23				3	F3:10339	20150812RA rerun MIN6N8_BSA ALT Kd pooled.wiff	1	0	0	1	0	0	0	Q9QZB1			PEAKS DB
KEGIIGPPGMLGP	16.75	1264.68	13	26	633.366	69.27				634.98			4	F4:11684	20150812RA rerun MIN6N8_BSA Kd pooled.wiff	1	0	0	0	1	0	0	Q5QNQ9			PEAKS DB
SYTFLREAL	16.74	1098.57	9	2.8	550.294	63.74						129.53	6	F6:11550	20150812RA rerun MIN6N8_UT Kd pooled.wiff	1	0	0	0	0	0	1	Q8VC16			PEAKS DB
AGLFKLTEL	16.72	990.575	9	-36.1	496.277	73.58						196.99	6	F6:13320	20150812RA rerun MIN6N8_UT Kd pooled.wiff	1	0	0	0	0	0	1	Q8K377			PEAKS DB
LHQEVSVLV	16.68	1022.58	9	-12.9	512.289	56.2						1182.1	6	F6:9760	20150812RA rerun MIN6N8_UT Kd pooled.wiff	1	0	0	0	0	0	1	Q91YE5			PEAKS DB
KYQEALDVI	16.67	1077.57	9	7	539.796	53.88				818.65		1084	6	F6:9364	20150812RA rerun MIN6N8_UT Kd pooled.wiff	2	0	0	0	1	0	1	Q8BWZ3			PEAKS DB
SYRDVIQEL	16.64	1121.57	9	-1.7	561.79	59.66	315.78					530.08	1	F1:10019	20150812RA rerun MIN6N8_AGE-BSA ALT Kd pooled.wiff	2	1	0	0	0	0	1	Q921I6			PEAKS DB
VPTPRSGS	16.61	799.419	8	3.4	800.429	40.75						237.54	6	F6:7855	20150812RA rerun MIN6N8_UT Kd pooled.wiff	1	0	0	0	0	0	1	Q09XV5			PEAKS DB
DYKESFNTI	16.57	1115.51	9	4	558.766	50.23						318.37	6	F6:8785	20150812RA rerun MIN6N8_UT Kd pooled.wiff	1	0	0	0	0	0	1	Q921D9			PEAKS DB
YSLPGVALTL	16.56	1032.59	10	-38.4	517.28	53.1						0	6	F6:9188	20150812RA rerun MIN6N8_UT Kd pooled.wiff	0	0	0	0	0	0	0	Q8K2V1			PEAKS DB
AGTTVGKGVTT	16.56	990.534	11	-22.9	496.263	45.85		570.98					2	F2:7535	20150812RA rerun MIN6N8_AGE-BSA Kd pooled.wiff	1	0	1	0	0	0	0	Q7TPH6			PEAKS DB
DASEVGAAPQT	16.55	1044.47	11	6.5	523.247	52.91						26.6	6	F6:9158	20150812RA rerun MIN6N8_UT Kd pooled.wiff	1	0	0	0	0	0	1	Q9WTJ4			PEAKS DB
RSRMDSSVS	16.5	1023.48	9	11.4	512.751	56.56		661.61					2	F2:9643	20150812RA rerun MIN6N8_AGE-BSA Kd pooled.wiff	1	0	1	0	0	0	0	Q5NCY0			PEAKS DB
WDSPSRSRV	16.48	1088.54	9	-3.4	545.274	45.27				28.897			4	F4:7571	20150812RA rerun MIN6N8_BSA Kd pooled.wiff	1	0	0	0	1	0	0	Q5GH66			PEAKS DB
KFVDGVSTV	16.45	950.507	9	-3	476.258	41.76	0						1	F1:7074	20150812RA rerun MIN6N8_AGE-BSA ALT Kd pooled.wiff	0	0	0	0	0	0	0	Q8CG48			PEAKS DB
HILKDAEVV	16.37	1022.58	9	-11.2	512.29	56.01					644.48		5	F5:10335	20150812RA rerun MIN6N8_Recon ALT Kd pooled.wiff	1	0	0	0	0	1	0	Q8R151			PEAKS DB
SYLPVILDMI	16.32	1162.63	10	-25.1	582.308	57.16				524.54			4	F4:9624	20150812RA rerun MIN6N8_BSA Kd pooled.wiff	1	0	0	0	1	0	0	Q61207			PEAKS DB
YYSPLRDLL	16.29	1138.6	9	-0.5	570.308	71.51		326.56				236.41	6	F6:13062	20150812RA rerun MIN6N8_UT Kd pooled.wiff	2	0	1	0	0	0	1	Q60790			PEAKS DB
AGGPQTPTSTPAPGSATR	16.21	1652.81	18	-9.6	551.937	60.33			0				3	F3:9798	20150812RA rerun MIN6N8_BSA ALT Kd pooled.wiff	0	0	0	0	0	0	0	O70279			PEAKS DB
YTADGIKYF	16.16	1076.52	9	-5.6	539.263	50.52						186.15	6	F6:8816	20150812RA rerun MIN6N8_UT Kd pooled.wiff	1	0	0	0	0	0	1	Q9WV89			PEAKS DB
DLLSQDDSVFV	16.16	1236.59	11	-9	619.295	62.43						61.799	6	F6:11234	20150812RA rerun MIN6N8_UT Kd pooled.wiff	1	0	0	0	0	0	1	Q69ZW3			PEAKS DB
TNPPTQKPPSPP	16.13	1259.65	12	1.3	630.834	44.34						1254.2	6	F6:8086	20150812RA rerun MIN6N8_UT Kd pooled.wiff	1	0	0	0	0	0	1	Q8CBW3			PEAKS DB
GFNPALQLI	16.12	971.544	9	1.9	486.778	75.89	188.41		159.58				3	F3:11209	20150812RA rerun MIN6N8_BSA ALT Kd pooled.wiff	2	1	0	1	0	0	0	Q9ER81			PEAKS DB
IELIITGMT	16.07	989.547	9	-25	495.768	61.99		138.13					2	F2:10991	20150812RA rerun MIN6N8_AGE-BSA Kd pooled.wiff	1	0	1	0	0	0	0	Q64446			PEAKS DB
SYWAVVREL	16.07	1121.59	9	-0.1	561.801	69.5				108.87			4	F4:11719	20150812RA rerun MIN6N8_BSA Kd pooled.wiff	1	0	0	0	1	0	0	Q8R2R5			PEAKS DB
PCLTFIISSI	16.05	1092.59	10	29.4	547.318	68.13				189.12			4	F4:11499	20150812RA rerun MIN6N8_BSA Kd pooled.wiff	1	0	0	0	1	0	0	G5E872			PEAKS DB
LPGGFPPTGM(+15.99)	16.03	988.469	10	-15.1	495.234	59.59		3922.4					2	F2:10353	20150812RA rerun MIN6N8_AGE-BSA Kd pooled.wiff	1	0	1	0	0	0	0	P47239	Oxidation (M)	M10:Oxidation (M):1000.00	PEAKS DB
SYSGETGALVL	16.01	1095.54	11	3.1	548.779	60.11	113.07						1	F1:10102	20150812RA rerun MIN6N8_AGE-BSA ALT Kd pooled.wiff	1	1	0	0	0	0	0	O89104			PEAKS DB
LNDVLKMD	15.98	946.479	8	31.8	474.262	62.78						0	6	F6:11330	20150812RA rerun MIN6N8_UT Kd pooled.wiff	0	0	0	0	0	0	0	Q80XI7			PEAKS DB
YFDESLVLL	15.96	1097.56	9	22	549.802	60.58					2953.9		5	F5:11099	20150812RA rerun MIN6N8_Recon ALT Kd pooled.wiff	1	0	0	0	0	1	0	Q9JHE4			PEAKS DB
ALSFNLFTM(+15.99)L	15.96	1171.59	10	-26.8	586.786	60.29			577.34				3	F3:9794	20150812RA rerun MIN6N8_BSA ALT Kd pooled.wiff	1	0	0	1	0	0	0	Q8BJM5	Oxidation (M)	M9:Oxidation (M):1000.00	PEAKS DB
LHNIPDALGVI	15.95	1160.66	11	-16.4	581.323	75.12			45.233				3	F3:11164	20150812RA rerun MIN6N8_BSA ALT Kd pooled.wiff	1	0	0	1	0	0	0	Q8K441			PEAKS DB
KYAGDLLQLP	15.94	1116.62	10	-38.5	559.295	63.67		0					2	F2:11431	20150812RA rerun MIN6N8_AGE-BSA Kd pooled.wiff	0	0	0	0	0	0	0	Q5DTZ0			PEAKS DB
QHAISTQ	15.94	783.388	7	-14.8	784.383	56.78		0					2	F2:9692	20150812RA rerun MIN6N8_AGE-BSA Kd pooled.wiff	0	0	0	0	0	0	0	Q9JKK8			PEAKS DB
SSNIVGNGIAM	15.91	1061.52	11	31.7	531.783	59.42		729.88					2	F2:10313	20150812RA rerun MIN6N8_AGE-BSA Kd pooled.wiff	1	0	1	0	0	0	0	Q61321			PEAKS DB
SSLISYLVTL	15.9	1094.62	10	40.7	548.341	68.89					71.376		5	F5:12849	20150812RA rerun MIN6N8_Recon ALT Kd pooled.wiff	1	0	0	0	0	1	0	Q3UHF7			PEAKS DB
HSGGPESQEM	15.89	1057.41	10	5.3	529.717	54.54					999.27		5	F5:10054	20150812RA rerun MIN6N8_Recon ALT Kd pooled.wiff	1	0	0	0	0	1	0	Q8BGM7			PEAKS DB
KYESVIATL	15.81	1022.56	9	2.3	512.291	55.99		1189.1					2	F2:9409	20150812RA rerun MIN6N8_AGE-BSA Kd pooled.wiff	1	0	1	0	0	0	0	O35643			PEAKS DB
HYSAIYSLL	15.78	1065.55	9	1.6	533.781	68.18	409.48						1	F1:11458	20150812RA rerun MIN6N8_AGE-BSA ALT Kd pooled.wiff	1	1	0	0	0	0	0	Q6P4S6			PEAKS DB
YYYINYTTI	15.77	1212.57	9	-0.1	607.292	69.75		963.61					2	F2:12646	20150812RA rerun MIN6N8_AGE-BSA Kd pooled.wiff	1	0	1	0	0	0	0	Q6P4T2			PEAKS DB
AGLKCGPITST	15.75	1046.54	11	34.4	524.297	62.04						0	6	F6:11116	20150812RA rerun MIN6N8_UT Kd pooled.wiff	0	0	0	0	0	0	0	Q6P1H6			PEAKS DB
RLRRLNSTAG	15.74	1142.66	10	25.8	572.354	58.19				106.65			4	F4:9778	20150812RA rerun MIN6N8_BSA Kd pooled.wiff	1	0	0	0	1	0	0	Q640N1			PEAKS DB
TGGATVA	15.7	575.292	7	4.1	576.301	67.2						0	6	F6:12328	20150812RA rerun MIN6N8_UT Kd pooled.wiff	0	0	0	0	0	0	0	P40645			PEAKS DB
LALPVPGNH	15.66	916.513	9	-0.9	459.263	53.53						57.44	6	F6:9261	20150812RA rerun MIN6N8_UT Kd pooled.wiff	1	0	0	0	0	0	1	Q8BG22			PEAKS DB
SYGSVFKAI	15.62	970.512	9	-13.9	486.255	57.33	0						1	F1:9534	20150812RA rerun MIN6N8_AGE-BSA ALT Kd pooled.wiff	0	0	0	0	0	0	0	Q9JI10			PEAKS DB
KFVQSKWLI	15.59	1147.68	9	-2.3	574.844	58.03						97.058	6	F6:10147	20150812RA rerun MIN6N8_UT Kd pooled.wiff	1	0	0	0	0	0	1	Q9D720			PEAKS DB
EDVPEGLGSALGS	15.59	1229.58	13	-41.5	615.77	57.88		196.84					2	F2:9983	20150812RA rerun MIN6N8_AGE-BSA Kd pooled.wiff	1	0	1	0	0	0	0	Q3V1N1			PEAKS DB
MIITQYIPK	15.56	1105.62	9	17.6	553.827	61.04				273.02			4	F4:10352	20150812RA rerun MIN6N8_BSA Kd pooled.wiff	1	0	0	0	1	0	0	Q80V31			PEAKS DB
GYYAM(+15.99)VGQV	15.55	1002.45	9	-3.7	502.229	48.64				68.456			4	F4:7978	20150812RA rerun MIN6N8_BSA Kd pooled.wiff	1	0	0	0	1	0	0	Q8K2C8	Oxidation (M)	M5:Oxidation (M):1000.00	PEAKS DB
TVKSLFGGVIT	15.51	1120.65	11	-26.4	561.317	59.57		0					2	F2:10381	20150812RA rerun MIN6N8_AGE-BSA Kd pooled.wiff	0	0	0	0	0	0	0	Q6ZQ93			PEAKS DB
GYATLIQTL	15.46	978.539	9	0.6	490.277	72.11		57.84					2	F2:12944	20150812RA rerun MIN6N8_AGE-BSA Kd pooled.wiff	1	0	1	0	0	0	0	A2A891			PEAKS DB
TVSAGIPGEPGSPG	15.42	1224.6	14	-0.6	613.306	55.52						117.64	6	F6:9614	20150812RA rerun MIN6N8_UT Kd pooled.wiff	1	0	0	0	0	0	1	Q8C6K9			PEAKS DB
SLASIFNSSST	15.41	1112.53	11	-27.3	557.26	57.49						0	6	F6:10006	20150812RA rerun MIN6N8_UT Kd pooled.wiff	0	0	0	0	0	0	0	Q923I7			PEAKS DB
TYEAALETI	15.4	1009.5	9	-1.2	505.755	59.88		104.19					2	F2:10470	20150812RA rerun MIN6N8_AGE-BSA Kd pooled.wiff	1	0	1	0	0	0	0	Q8BG32			PEAKS DB
YTGEQISLF	15.34	1056.51	9	29	529.279	58.93					108.39		5	F5:10853	20150812RA rerun MIN6N8_Recon ALT Kd pooled.wiff	1	0	0	0	0	1	0	Q9QXS1			PEAKS DB
NITAMNGTIY	15.32	1096.52	10	28.5	549.284	56.82				222.04			4	F4:9523	20150812RA rerun MIN6N8_BSA Kd pooled.wiff	1	0	0	0	1	0	0	Q80T79			PEAKS DB
SSNNLGPVLPPTNVGSN(+162.05)T	15.31	1928.93	18	15.4	965.485	58.34	8643						1	F1:10013	20150812RA rerun MIN6N8_AGE-BSA ALT Kd pooled.wiff	1	1	0	0	0	0	0	P12968	Hexose (NSY)	N17:Hexose (NSY):0.00	PEAKS PTM
YDLVRNAET	15.24	1079.52	9	23.6	540.782	59.61						0	6	F6:10504	20150812RA rerun MIN6N8_UT Kd pooled.wiff	0	0	0	0	0	0	0	Q80Y84			PEAKS DB
RAELPVTDKSDDSLPMGV	15.23	1928.95	18	5.7	965.485	58.34	8643						1	F1:10098	20150812RA rerun MIN6N8_AGE-BSA ALT Kd pooled.wiff	1	1	0	0	0	0	0	Q80U93			PEAKS DB
TYLDSKSQL	15.21	1053.53	9	-0.6	527.772	41.39	51.733						1	F1:7048	20150812RA rerun MIN6N8_AGE-BSA ALT Kd pooled.wiff	1	1	0	0	0	0	0	Q8K389			PEAKS DB
EGRARFSM(+15.99)SSAHTREMLD	15.19	2095.95	18	-21.6	524.984	71.77		0					2	F2:12875	20150812RA rerun MIN6N8_AGE-BSA Kd pooled.wiff	0	0	0	0	0	0	0	Q8BG54	Oxidation (M)	M8:Oxidation (M):19.61	PEAKS DB
LEQHIQNPV	15.17	1076.56	9	-44.5	539.262	50.27	0						1	F1:8276	20150812RA rerun MIN6N8_AGE-BSA ALT Kd pooled.wiff	0	0	0	0	0	0	0	Q91YN1			PEAKS DB
ATPVRSGSNPQ	15.16	1112.56	11	-1.9	557.285	57.92					0		5	F5:10620	20150812RA rerun MIN6N8_Recon ALT Kd pooled.wiff	0	0	0	0	0	0	0	P12968			PEAKS DB
RYLEQLHQL	15.16	1198.65	9	2	600.331	47.04		925.8					2	F2:7714	20150812RA rerun MIN6N8_AGE-BSA Kd pooled.wiff	1	0	1	0	0	0	0	P42227			PEAKS DB
TYYAAFAAEL	15.13	1118.53	10	-10.7	560.265	62.07				329.84			4	F4:10517	20150812RA rerun MIN6N8_BSA Kd pooled.wiff	1	0	0	0	1	0	0	Q5U430			PEAKS DB
AWPPAASAALN	15.12	1067.54	11	-43.1	534.754	68.77						2126.8	6	F6:12704	20150812RA rerun MIN6N8_UT Kd pooled.wiff	1	0	0	0	0	0	1	Q61080			PEAKS DB
LATGPNLPSVL	15.11	1080.62	11	-29.8	541.3	66.54		1930.9					2	F2:11978	20150812RA rerun MIN6N8_AGE-BSA Kd pooled.wiff	1	0	1	0	0	0	0	Q8BLI0			PEAKS DB
QNLMMSKYL	15.1	1126.55	9	46.8	564.307	52.42	290.81						1	F1:8585	20150812RA rerun MIN6N8_AGE-BSA ALT Kd pooled.wiff	1	1	0	0	0	0	0	Q69Z23			PEAKS DB
GVPGGVGPGGVTGIGA	15.1	1250.66	16	-14	626.33	63.71		132.43					2	F2:11436	20150812RA rerun MIN6N8_AGE-BSA Kd pooled.wiff	1	0	1	0	0	0	0	P54320			PEAKS DB
DYNIQKESTL	15.08	1209.59	10	-1.8	605.8	44.93				70.467			4	F4:7522	20150812RA rerun MIN6N8_BSA Kd pooled.wiff	1	0	0	0	1	0	0	P62984			PEAKS DB
IHLIDPNTLQ	15.07	1162.63	10	-30.5	582.307	57.08		677.72					2	F2:9757	20150812RA rerun MIN6N8_AGE-BSA Kd pooled.wiff	1	0	1	0	0	0	0	Q99L48			PEAKS DB
SNHPSAGGSHL	15.07	1062.48	11	19.5	532.26	47.55		131.76					2	F2:7767	20150812RA rerun MIN6N8_AGE-BSA Kd pooled.wiff	1	0	1	0	0	0	0	Q8K010			PEAKS DB
KDRTRLKSPSLAIMST	15.07	1803	16	-39.9	601.985	63.99					0		5	F5:11888	20150812RA rerun MIN6N8_Recon ALT Kd pooled.wiff	0	0	0	0	0	0	0	Q5DTI6			PEAKS DB
ELSSQARTEL	15.07	1132.57	10	6.6	567.295	57.2	191.23						1	F1:9500	20150812RA rerun MIN6N8_AGE-BSA ALT Kd pooled.wiff	1	1	0	0	0	0	0	O88327			PEAKS DB
TVSSETIKSI	15.05	1063.58	10	16.6	532.804	56.47				76.706			4	F4:9457	20150812RA rerun MIN6N8_BSA Kd pooled.wiff	1	0	0	0	1	0	0	Q9D6F4			PEAKS DB
SYMPQQVTV	15	1051.5	9	-0.1	526.758	52.77					27.03		5	F5:9799	20150812RA rerun MIN6N8_Recon ALT Kd pooled.wiff	1	0	0	0	0	1	0	Q5SSH7			PEAKS DB
