# Supplementary material for: Short Duration Alagebrium Chloride Therapy Prediabetes Does Not Inhibit Progression to Autoimmune Diabetes in an Experimental Model
Source: Metabolites. 2021 Jun 28;11(7):426. doi: 10.3390/metabo11070426 (PMC8305727; doi:10.3390/metabo11070426)
Supplement: Supplementary file 1 [file metabolites-11-00426-s001.zip › Table S2 Db peptide.xlsx]

## Sheet: peptide
Peptide	-10lgP	Mass	Length	ppm	m/z	RT	Area Sample 1	Area Sample 2	Area Sample 3	Area Sample 4	Area Sample 5	Area Sample 6	Fraction	Scan	Source File	#Feature	#Feature Sample 1	#Feature Sample 2	#Feature Sample 3	#Feature Sample 4	#Feature Sample 5	#Feature Sample 6	Accession	PTM	AScore	Found By
PVNHEEL	34.99	836.403	7	-2.3	419.207	45.78	160.7	326.68	163.41	78.275	121.93	231.36	4	F4:7826	20150812RA rerun MIN6N8_BSA Db pooled.wiff	6	1	1	1	1	1	1	P46414			PEAKS DB
PSNLPYL	15.57	802.423	7	2	402.218	62.31			332.85				3	F3:11200	20150812RA rerun MIN6N8_BSA ALT Db pooled.wiff	1	0	0	1	0	0	0	Q8BFV3			PEAKS DB
PYGRITL	16.58	818.465	7	4	410.24	51.95		0					2	F2:8413	20150812RA rerun MIN6N8_AGE-BSA Db pooled.wiff	0	0	0	0	0	0	0	Q5SQX6			PEAKS DB
PTNLIHL	25.21	806.465	7	-6.3	404.236	67.53		0					2	F2:11428	20150812RA rerun MIN6N8_AGE-BSA Db pooled.wiff	0	0	0	0	0	0	0	Q6WKZ8			PEAKS DB
NIPGNST	15.91	701.334	7	-3.1	702.337	58.24				240.24			4	F4:9658	20150812RA rerun MIN6N8_BSA Db pooled.wiff	1	0	0	0	1	0	0	Q8VE08			PEAKS DB
YQLENYC(+119.00)N	31.7	1164.42	8	2.4	583.22	40.12	0	466.33	201.41	16.483		42.455	6	F6:7958	20150812RA rerun MIN6N8_UT Db pooled.wiff	4	0	1	1	1	0	1	P01326:P01325	Cysteinylation	C7:Cysteinylation:1000.00	PEAKS PTM
SALRHYIN(-18.01)	32.82	954.504	8	1.1	478.258	48.89	1513.2	3336.9	3116.6	1103.5	1110.4	2362.3	3	F3:9099	20150812RA rerun MIN6N8_BSA ALT Db pooled.wiff	6	1	1	1	1	1	1	P57774	Dehydration	N8:Dehydration:54.01	PEAKS PTM
VVPPVNGV	35.36	779.454	8	-43.2	390.716	60.18			360.15	138.6			3	F3:10825	20150812RA rerun MIN6N8_BSA ALT Db pooled.wiff	2	0	0	1	1	0	0	Q7TPM1			PEAKS DB
ALAAPAGP	19.82	666.37	8	-0.3	334.191	62.78			0				3	F3:11333	20150812RA rerun MIN6N8_BSA ALT Db pooled.wiff	0	0	0	0	0	0	0	P22091			PEAKS DB
YQLENYC(+47.98)N	17.23	1093.4	8	-0.2	547.706	42.14	196.65						1	F1:7144	20150812RA rerun MIN6N8_AGE-BSA ALT Db pooled.wiff	1	1	0	0	0	0	0	P01326:P01325	Cysteine oxidation to cysteic acid	C7:Cysteine oxidation to cysteic acid:1000.00	PEAKS PTM
YQLENYC(+305.07)N	18.51	1350.49	8	0.6	676.248	43.14	19219		32142				3	F3:8627	20150812RA rerun MIN6N8_BSA ALT Db pooled.wiff	2	1	0	1	0	0	0	P01326:P01325	Glutathione disulfide	C7:Glutathione disulfide:1000.00	PEAKS PTM
IDDIRYYI	17.11	1069.54	8	11.8	535.784	51.85	69.324						1	F1:8145	20150812RA rerun MIN6N8_AGE-BSA ALT Db pooled.wiff	1	1	0	0	0	0	0	Q9QZ41			PEAKS DB
GNILKHVM(+15.99)	27.36	926.501	8	9	464.262	45.03						31.424	6	F6:8326	20150812RA rerun MIN6N8_UT Db pooled.wiff	1	0	0	0	0	0	1	Q8R4R6	Oxidation (M)	M8:Oxidation (M):1000.00	PEAKS DB
MRSWETNI	23.04	1035.48	8	-27.1	518.732	52.47		407.95					2	F2:8470	20150812RA rerun MIN6N8_AGE-BSA Db pooled.wiff	1	0	1	0	0	0	0	Q8C7X2			PEAKS DB
QDLKYATL	17.07	950.507	8	-30.1	476.245	53.6		522.58					2	F2:8693	20150812RA rerun MIN6N8_AGE-BSA Db pooled.wiff	1	0	1	0	0	0	0	Q9JHU4			PEAKS DB
PGYPEPYL	28.01	934.444	8	-0.6	468.228	56.32		36.96					2	F2:9177	20150812RA rerun MIN6N8_AGE-BSA Db pooled.wiff	1	0	1	0	0	0	0	Q3UZ09			PEAKS DB
YFVGTIVF	15.13	944.501	8	0	473.257	60.14		1906.5					2	F2:10021	20150812RA rerun MIN6N8_AGE-BSA Db pooled.wiff	1	0	1	0	0	0	0	Q9JJJ7			PEAKS DB
PRGRSLVI	15.33	896.556	8	-24.3	449.273	62.54		1112.6					2	F2:10550	20150812RA rerun MIN6N8_AGE-BSA Db pooled.wiff	1	0	1	0	0	0	0	Q9Z2B5			PEAKS DB
QIVNPHLL	28.28	932.544	8	4.8	467.282	67.15				198.88	253.83	96.162	6	F6:10149	20150812RA rerun MIN6N8_UT Db pooled.wiff	3	0	0	0	1	1	1	P07742			PEAKS DB
KNYLNQHI	17.28	1028.54	8	37.2	1029.58	55.17		0					2	F2:8984	20150812RA rerun MIN6N8_AGE-BSA Db pooled.wiff	0	0	0	0	0	0	0	P35689			PEAKS DB
YQLENYCN(+14.02)	16.89	1059.43	8	-34.8	530.704	43.73		46.307					2	F2:7359	20150812RA rerun MIN6N8_AGE-BSA Db pooled.wiff	1	0	1	0	0	0	0	P01326:P01325	Methylation(C-term)	N8:Methylation(C-term):1000.00	PEAKS PTM
SSIVNKEGL	26.65	945.513	9	-1.7	473.761	37.54	51.042	235.42	95.81				3	F3:7951	20150812RA rerun MIN6N8_BSA ALT Db pooled.wiff	3	1	1	1	0	0	0	P49813			PEAKS DB
VGLINKDSV	39.66	943.534	9	-0.6	472.773	42.21	230.74	222.3	58.191	115.68		155.47	4	F4:7587	20150812RA rerun MIN6N8_BSA Db pooled.wiff	5	1	1	1	1	0	1	Q99MY8			PEAKS DB
GQLENAEQL	31.84	1000.48	9	2.4	501.248	44.01	112.78	277.39	72.293			107.5	2	F2:7368	20150812RA rerun MIN6N8_AGE-BSA Db pooled.wiff	4	1	1	1	0	0	1	Q8CC21			PEAKS DB
YM(+15.99)PQNPHII	37.13	1127.54	9	-1	564.777	44.08	706.35	867.02	591.79	20.152		666.14	3	F3:8729	20150812RA rerun MIN6N8_BSA ALT Db pooled.wiff	5	1	1	1	1	0	1	Q60973	Oxidation (M)	M2:Oxidation (M):1000.00	PEAKS DB
YGNILKHVM(+15.99)	63.65	1089.56	9	0.4	545.79	45.03	105.84	403.24	335.64	152.47	77.129	442.16	6	F6:8305	20150812RA rerun MIN6N8_UT Db pooled.wiff	6	1	1	1	1	1	1	Q8R4R6	Oxidation (M)	M9:Oxidation (M):1000.00	PEAKS DB
AMGVNLTSM(+15.99)	43.19	938.42	9	-3	470.216	45.15	141.04	625.58	530.8	205.38	436.72	1048.6	6	F6:8363	20150812RA rerun MIN6N8_UT Db pooled.wiff	6	1	1	1	1	1	1	P17918	Oxidation (M)	M9:Oxidation (M):136.94	PEAKS DB
SSPENKNWL	15.79	1073.51	9	2.7	537.766	45.66						164.5	6	F6:8380	20150812RA rerun MIN6N8_UT Db pooled.wiff	1	0	0	0	0	0	1	Q3TLR7			PEAKS DB
AVLTNQETI	26.27	987.524	9	1.9	494.769	45.7		1924.5		894.61	1050.8	1416.6	5	F5:9640	20150812RA rerun MIN6N8_Recon ALT Db pooled.wiff	4	0	1	0	1	1	1	Q3UGY8			PEAKS DB
FGPVNHEEL	43.99	1040.49	9	3.2	521.254	45.71	10811	12153	7662.3	6201.1	8296.2	8910.8	2	F2:7528	20150812RA rerun MIN6N8_AGE-BSA Db pooled.wiff	6	1	1	1	1	1	1	P46414			PEAKS DB
NSIRNLDTI	46.34	1044.56	9	1.9	523.284	46.24	13232	15417	10029	8541.6	10445	10246	1	F1:7470	20150812RA rerun MIN6N8_AGE-BSA ALT Db pooled.wiff	8	1	1	2	2	1	1	P28658			PEAKS DB
ISGVNRYYV	52.38	1069.56	9	1.2	535.783	46.29	1088.8	1170.3	974.34	622.72	907.76	851.7	1	F1:7485	20150812RA rerun MIN6N8_AGE-BSA ALT Db pooled.wiff	6	1	1	1	1	1	1	O35683			PEAKS DB
SQHVNLDQL	22.48	1052.53	9	-1.4	527.268	46.52	186.14		123.48	102.15	151.84		4	F4:7927	20150812RA rerun MIN6N8_BSA Db pooled.wiff	4	1	0	1	1	1	0	Q8CDJ3			PEAKS DB
VGIENIHVM(+15.99)	47.6	1026.52	9	1.8	514.265	47.19	2274.2	5509.7	7578.3	2950.2	2705.1	6298.8	3	F3:9005	20150812RA rerun MIN6N8_BSA ALT Db pooled.wiff	6	1	1	1	1	1	1	Q8VE11	Oxidation (M)	M9:Oxidation (M):1000.00	PEAKS DB
SGVVNEETF	31.29	980.445	9	1.7	491.229	47.35	151.93	163.07					2	F2:7741	20150812RA rerun MIN6N8_AGE-BSA Db pooled.wiff	2	1	1	0	0	0	0	Q9JJ57:Q6PHZ8			PEAKS DB
FAHTNIESL	21.45	1030.51	9	1.5	516.261	47.82		958.15	669.23	457.09		604.46	4	F4:8079	20150812RA rerun MIN6N8_BSA Db pooled.wiff	4	0	1	1	1	0	1	P27773			PEAKS DB
YSPQNSDYL	21.31	1085.47	9	-0.5	543.74	48.12		671.13	175.59			212.45	6	F6:8654	20150812RA rerun MIN6N8_UT Db pooled.wiff	3	0	1	1	0	0	1	Q6PHU5			PEAKS DB
ASVLNVNHI	46.04	965.529	9	1.4	483.773	48.69	1561.9	1756.3	1143.3	870.04	1143.2	1349.5	6	F6:8681	20150812RA rerun MIN6N8_UT Db pooled.wiff	6	1	1	1	1	1	1	Q99NH0			PEAKS DB
SALRHYINL	42.32	1085.6	9	1.3	543.805	48.91	3713.6	8904.9	8325.6	3324.3	3687.1	5947.1	1	F1:7756	20150812RA rerun MIN6N8_AGE-BSA ALT Db pooled.wiff	6	1	1	1	1	1	1	P57774			PEAKS DB
YMPQNPHII	25.7	1111.55	9	-0.8	556.779	49.23	138.82		179.64		194.38		3	F3:9180	20150812RA rerun MIN6N8_BSA ALT Db pooled.wiff	3	1	0	1	0	1	0	Q60973			PEAKS DB
HAIENIDTF	45.75	1058.5	9	-0.9	530.257	49.68	0	868.01	468.75	197.74			2	F2:8080	20150812RA rerun MIN6N8_AGE-BSA Db pooled.wiff	3	0	1	1	1	0	0	P97929			PEAKS DB
RTVENVTVF	22.87	1063.57	9	2.1	532.79	49.86		873.46	1177.4	355.16	405.6	445.48	3	F3:9241	20150812RA rerun MIN6N8_BSA ALT Db pooled.wiff	5	0	1	1	1	1	1	Q62465			PEAKS DB
SSVLNVVSM(+15.99)	30.32	950.474	9	-1.7	476.242	50.6			89.264				3	F3:9299	20150812RA rerun MIN6N8_BSA ALT Db pooled.wiff	1	0	0	1	0	0	0	P55200	Oxidation (M)	M9:Oxidation (M):1000.00	PEAKS DB
AM(+15.99)GVNLTSM	30.54	938.42	9	1.6	470.217	50.77		487.1	704.2	75.077	449.83		4	F4:8588	20150812RA rerun MIN6N8_BSA Db pooled.wiff	4	0	1	1	1	1	0	P17918	Oxidation (M)	M2:Oxidation (M):83.89	PEAKS DB
SSVQNGIM(+15.99)L	26.28	963.47	9	2.8	482.742	50.87		335.06	754.92		255.47		2	F2:8244	20150812RA rerun MIN6N8_AGE-BSA Db pooled.wiff	3	0	1	1	0	1	0	Q80U04	Oxidation (M)	M8:Oxidation (M):1000.00	PEAKS DB
KALINADEL	38.4	985.544	9	-2.2	493.778	51.16	1424.4	8001.9	10909	3392.4	4765.6	1053.7	6	F6:8954	20150812RA rerun MIN6N8_UT Db pooled.wiff	6	1	1	1	1	1	1	P16546			PEAKS DB
RMLENYEEI	15.73	1195.55	9	0.6	598.783	50.99					0		5	F5:10188	20150812RA rerun MIN6N8_Recon ALT Db pooled.wiff	0	0	0	0	0	0	0	Q8VE73			PEAKS DB
YQYTNSEVL	18.76	1115.51	9	1.3	558.763	51.08		244.26	418.51		204.88		5	F5:10206	20150812RA rerun MIN6N8_Recon ALT Db pooled.wiff	3	0	1	1	0	1	0	Q9CRT8			PEAKS DB
IGIENIHVM(+15.99)	44.08	1040.53	9	1.5	521.273	51.61		1614.3	2340.2	545.71	564.09		4	F4:8663	20150812RA rerun MIN6N8_BSA Db pooled.wiff	4	0	1	1	1	1	0	Q9Z2C9	Oxidation (M)	M9:Oxidation (M):1000.00	PEAKS DB
VQLENQM(+15.99)VL	31.1	1088.55	9	2.2	545.283	51.68		240.29	515.38				3	F3:9427	20150812RA rerun MIN6N8_BSA ALT Db pooled.wiff	3	0	1	2	0	0	0	Q9WU84	Oxidation (M)	M7:Oxidation (M):1000.00	PEAKS DB
AGTRNIYYL	16.69	1069.56	9	1	535.784	51.79			486.19				3	F3:9437	20150812RA rerun MIN6N8_BSA ALT Db pooled.wiff	1	0	0	1	0	0	0	Q9CQN1			PEAKS DB
AAIENIEHL	32.13	1008.52	9	2.8	505.269	51.78		284.24	343.47	123.32	63.892		2	F2:8369	20150812RA rerun MIN6N8_AGE-BSA Db pooled.wiff	4	0	1	1	1	1	0	Q6PB66			PEAKS DB
SAIINEDNL	41.27	987.487	9	3.1	494.752	52.19	5568.4	5850.7	3490.7	3571.2	3061.6	0	6	F6:9013	20150812RA rerun MIN6N8_UT Db pooled.wiff	5	1	1	1	1	1	0	Q8BG67			PEAKS DB
LGVTNFVHM(+15.99)	45.45	1032.51	9	-1.8	517.258	52.13		109.79	101.68		55.636		3	F3:9514	20150812RA rerun MIN6N8_BSA ALT Db pooled.wiff	3	0	1	1	0	1	0	Q3USW5	Oxidation (M)	M9:Oxidation (M):1000.00	PEAKS DB
SQVINPTAI	33.7	941.518	9	3	471.767	52.35	0	442.39	170.02	362.54			4	F4:8788	20150812RA rerun MIN6N8_BSA Db pooled.wiff	3	0	1	1	1	0	0	Q61191			PEAKS DB
PQNFTPSM(+15.99)I	36.03	1049.49	9	-1.6	525.748	52.92		478.93		214.45			2	F2:8564	20150812RA rerun MIN6N8_AGE-BSA Db pooled.wiff	2	0	1	0	1	0	0	Q9Z1T1	Oxidation (M)	M8:Oxidation (M):1000.00	PEAKS DB
YAFNMKATV	37.8	1043.51	9	1.7	522.762	53.57			90.597				3	F3:9715	20150812RA rerun MIN6N8_BSA ALT Db pooled.wiff	1	0	0	1	0	0	0	P63017			PEAKS DB
FAYEGRDYI	32.76	1132.52	9	1.1	567.266	53.94	3030.8	10473	8780.3	4161.6		198.93	2	F2:8848	20150812RA rerun MIN6N8_AGE-BSA Db pooled.wiff	5	1	1	1	1	0	1	P01899			PEAKS DB
TALLNAPHI	19.26	948.539	9	-1.9	475.275	54		30.731					2	F2:8805	20150812RA rerun MIN6N8_AGE-BSA Db pooled.wiff	1	0	1	0	0	0	0	Q9JLB2			PEAKS DB
AAPISPWTM(+15.99)	26.76	988.469	9	2.7	495.242	54.37			404.51		124.5		5	F5:10493	20150812RA rerun MIN6N8_Recon ALT Db pooled.wiff	2	0	0	1	0	1	0	Q3U133	Oxidation (M)	M9:Oxidation (M):1000.00	PEAKS DB
YVVDNIDHL	29.31	1086.53	9	-1.6	544.272	54.54			204.47				3	F3:9826	20150812RA rerun MIN6N8_BSA ALT Db pooled.wiff	1	0	0	1	0	0	0	Q9R1A8			PEAKS DB
VALRNLEQI	21.7	1054.61	9	0.8	528.313	54.57		43.137	94.501				2	F2:8873	20150812RA rerun MIN6N8_AGE-BSA Db pooled.wiff	2	0	1	1	0	0	0	Q99LH9			PEAKS DB
FALNNPEM(+15.99)V	23.78	1049.49	9	-1.5	525.747	54.71			159.17				3	F3:9840	20150812RA rerun MIN6N8_BSA ALT Db pooled.wiff	1	0	0	1	0	0	0	Q62433	Oxidation (M)	M8:Oxidation (M):1000.00	PEAKS DB
YGNILKHVM	48.08	1073.57	9	-3	537.789	54.68		200.87	81.501		56.724		2	F2:8885	20150812RA rerun MIN6N8_AGE-BSA Db pooled.wiff	3	0	1	1	0	1	0	Q8R4R6			PEAKS DB
NEPAVLYNL	18.1	1031.53	9	-20.4	516.76	55.46			18681	10656			4	F4:9229	20150812RA rerun MIN6N8_BSA Db pooled.wiff	2	0	0	1	1	0	0	P13541			PEAKS DB
FSLINGDDM(+15.99)	28.61	1026.43	9	0.7	514.223	55.81		404.28	188.17		40.898		2	F2:9049	20150812RA rerun MIN6N8_AGE-BSA Db pooled.wiff	3	0	1	1	0	1	0	Q8R4F0:Q99J21	Oxidation (M)	M9:Oxidation (M):1000.00	PEAKS DB
SLIILKQVM(+15.99)	38.62	1059.64	9	0.8	530.824	55.84	625.88	1480.8	1721.7	614.65	739.37	0	3	F3:10059	20150812RA rerun MIN6N8_BSA ALT Db pooled.wiff	5	1	1	1	1	1	0	Q9Z2U1	Oxidation (M)	M9:Oxidation (M):1000.00	PEAKS DB
GSIANFTNV	33.75	921.456	9	0.8	461.734	56.43		256.61					2	F2:9185	20150812RA rerun MIN6N8_AGE-BSA Db pooled.wiff	1	0	1	0	0	0	0	Q91V92			PEAKS DB
VQIKNDVFI	22.96	1074.61	9	3.1	538.311	56.54		1038.1	928.46	596.34	418.49		2	F2:9218	20150812RA rerun MIN6N8_AGE-BSA Db pooled.wiff	4	0	1	1	1	1	0	Q6PAR0			PEAKS DB
VGIENIHVM	41.92	1010.52	9	1.2	506.268	56.66	318.3	1871.8	1527.7	741.31	1332.9		2	F2:9232	20150812RA rerun MIN6N8_AGE-BSA Db pooled.wiff	5	1	1	1	1	1	0	Q8VE11			PEAKS DB
VTVLNVDHL	36.58	1008.56	9	1.6	505.287	56.94		301.83	334.75	144.79			4	F4:9505	20150812RA rerun MIN6N8_BSA Db pooled.wiff	3	0	1	1	1	0	0	Q9WUF3			PEAKS DB
VSILNRQVL	31.05	1040.63	9	-1.5	521.322	57.36	255.3	1156.9	895.84	419.32	313.2	0	5	F5:10836	20150812RA rerun MIN6N8_Recon ALT Db pooled.wiff	5	1	1	1	1	1	0	E9Q7G0			PEAKS DB
YQNHTVVFL	25.74	1119.57	9	-2.9	560.791	57.6	7681.1	16273		9375.4	12536	495.35	6	F6:9484	20150812RA rerun MIN6N8_UT Db pooled.wiff	5	1	1	0	1	1	1	O35464			PEAKS DB
TGPKNLLSL	31.21	941.555	9	-8.3	471.781	58.01	2183.7	4923.8	6614.4	2832.1	3032.3	0	6	F6:9531	20150812RA rerun MIN6N8_UT Db pooled.wiff	5	1	1	1	1	1	0	Q8CIP5			PEAKS DB
ISPVNPVAI	30.98	908.533	9	0.6	455.273	58.44	335		1056.8	394.06	297.89		5	F5:10910	20150812RA rerun MIN6N8_Recon ALT Db pooled.wiff	4	1	0	1	1	1	0	Q91WT8			PEAKS DB
SAPKYIDYL	19.5	1068.55	9	3.3	535.282	58.64			464.92				3	F3:10578	20150812RA rerun MIN6N8_BSA ALT Db pooled.wiff	1	0	0	1	0	0	0	Q921Y0			PEAKS DB
INVPNAEVL	18.45	967.534	9	-0.7	484.772	59.04			156.38				3	F3:10656	20150812RA rerun MIN6N8_BSA ALT Db pooled.wiff	1	0	0	1	0	0	0	P70398			PEAKS DB
SSPLNHIYL	42.21	1042.54	9	2.2	522.279	59.34					252.59		5	F5:10967	20150812RA rerun MIN6N8_Recon ALT Db pooled.wiff	1	0	0	0	0	1	0	Q9CPW9			PEAKS DB
IGPKNYEFL	34.94	1079.57	9	4.2	540.791	59.46	10452	33582	23715	13155	13897	0	2	F2:9921	20150812RA rerun MIN6N8_AGE-BSA Db pooled.wiff	5	1	1	1	1	1	0	Q8BHY8			PEAKS DB
AMGVNLTSM	31.2	922.425	9	-7.9	462.216	59.65	0	502.32	375.95		505.76	0	6	F6:9670	20150812RA rerun MIN6N8_UT Db pooled.wiff	3	0	1	1	0	1	0	P17918			PEAKS DB
NVPNTSVFL	15.09	989.518	9	-1.2	495.764	60.07			215.17				3	F3:10819	20150812RA rerun MIN6N8_BSA ALT Db pooled.wiff	1	0	0	1	0	0	0	Q80WT4			PEAKS DB
PNRESLDFL	42.72	1089.55	9	1	545.78	60.4	2500.6	3512.2	4732.5	1919.9	2114.3	53.337	6	F6:9712	20150812RA rerun MIN6N8_UT Db pooled.wiff	6	1	1	1	1	1	1	P12968			PEAKS DB
IGIENIHVM	39.8	1024.54	9	3.5	513.276	60.52		597.13	448.23	164.34	192.2		4	F4:9992	20150812RA rerun MIN6N8_BSA Db pooled.wiff	4	0	1	1	1	1	0	Q9Z2C9			PEAKS DB
AGLRLLTNM	30.47	987.553	9	0.2	494.783	61.1			129.95				3	F3:11036	20150812RA rerun MIN6N8_BSA ALT Db pooled.wiff	1	0	0	1	0	0	0	Q9D0L7:Q8BHS6:Q9CX83			PEAKS DB
FAIDDHDYL	33.11	1107.49	9	2.8	554.751	61.43	1230.9	6173.6	3152.5	1673.1	1620.5	708.31	5	F5:11128	20150812RA rerun MIN6N8_Recon ALT Db pooled.wiff	6	1	1	1	1	1	1	Q91XU3			PEAKS DB
TALENLSTL	26.48	960.513	9	3.8	481.264	61.74	2733.3	8638.2	8689.1	3799.1	3223.1	3072.7	2	F2:10355	20150812RA rerun MIN6N8_AGE-BSA Db pooled.wiff	6	1	1	1	1	1	1	P19096			PEAKS DB
AAPSNLPYL	37.88	944.497	9	0.1	473.254	62.34	817.41		3102.4	1510.9	919.75	618.52	4	F4:10254	20150812RA rerun MIN6N8_BSA Db pooled.wiff	5	1	0	1	1	1	1	Q8BFV3			PEAKS DB
SSLLNIQHF	23.04	1057.56	9	4.1	529.786	62.31		90.309					2	F2:10520	20150812RA rerun MIN6N8_AGE-BSA Db pooled.wiff	1	0	1	0	0	0	0	A2RSJ4			PEAKS DB
SGLTMITHL	44.9	971.511	9	3.8	486.765	62.64	125.39	204.98	557.77	133.02	229.07	18.095	6	F6:9846	20150812RA rerun MIN6N8_UT Db pooled.wiff	6	1	1	1	1	1	1	Q5U4C1			PEAKS DB
IGIENIHYL	51.48	1070.58	9	3.3	536.295	63.4	5342	13661	13240	8154.7	8884.6	6155.3	3	F3:11390	20150812RA rerun MIN6N8_BSA ALT Db pooled.wiff	6	1	1	1	1	1	1	Q9DB27:Q9CQ21			PEAKS DB
STISNDVFI	17.78	994.497	9	-2.5	498.255	63.99		1669.4				223.26	6	F6:9931	20150812RA rerun MIN6N8_UT Db pooled.wiff	2	0	1	0	0	0	1	Q80U12			PEAKS DB
SAISNLDYI	18.05	994.497	9	0.7	498.255	64.83			678.89				3	F3:11591	20150812RA rerun MIN6N8_BSA ALT Db pooled.wiff	1	0	0	1	0	0	0	Q9R0C8			PEAKS DB
SALANYIHL	36.33	1000.53	9	2.4	501.274	65.23		2192	2146	1141.9	1350	635.42	3	F3:11628	20150812RA rerun MIN6N8_BSA ALT Db pooled.wiff	5	0	1	1	1	1	1	Q8BPS4			PEAKS DB
SYFPEITHI	37.52	1105.54	9	5.7	553.781	65.93	235.04			428.07	461.22		4	F4:10603	20150812RA rerun MIN6N8_BSA Db pooled.wiff	3	1	0	0	1	1	0	P52332			PEAKS DB
SLIILKQVM	42.26	1043.64	9	1.8	522.827	66.03	113.22	437.56	597.49	193.39	536.46		3	F3:11775	20150812RA rerun MIN6N8_BSA ALT Db pooled.wiff	5	1	1	1	1	1	0	Q9Z2U1			PEAKS DB
GQVINLDQL	31.88	998.54	9	2	500.277	66.52	46.792	428.04	179.83		88.028		5	F5:11528	20150812RA rerun MIN6N8_Recon ALT Db pooled.wiff	4	1	1	1	0	1	0	Q3UVG3			PEAKS DB
FQIVNPHLL	36.61	1079.61	9	4.2	540.814	66.95	18451	42966	46630	29299	31999	32526	3	F3:11911	20150812RA rerun MIN6N8_BSA ALT Db pooled.wiff	6	1	1	1	1	1	1	P07742			PEAKS DB
KQILNIYDL	28.47	1118.63	9	3.7	560.325	67.29		353.65	321.03	255.47			2	F2:11366	20150812RA rerun MIN6N8_AGE-BSA Db pooled.wiff	3	0	1	1	1	0	0	Q91W86			PEAKS DB
TGIRNLEWL	18.82	1100.6	9	-2.3	551.303	67.98	167.91	426.15	370.7				3	F3:12008	20150812RA rerun MIN6N8_BSA ALT Db pooled.wiff	3	1	1	1	0	0	0	Q8BMD6			PEAKS DB
FQLEKIDYL	20.37	1167.62	9	4.1	584.817	68.14	30.973	152.05					2	F2:11514	20150812RA rerun MIN6N8_AGE-BSA Db pooled.wiff	2	1	1	0	0	0	0	Q99PW8			PEAKS DB
SALLLKDVL	27.08	970.606	9	3.6	486.311	68.37		105.42	95.545		49.235		2	F2:11539	20150812RA rerun MIN6N8_AGE-BSA Db pooled.wiff	3	0	1	1	0	1	0	Q8BZ36			PEAKS DB
YAPDSIYYL	22.65	1103.52	9	5.1	552.766	69.22	105.56					0	1	F1:10032	20150812RA rerun MIN6N8_AGE-BSA ALT Db pooled.wiff	1	1	0	0	0	0	0	Q9CU65			PEAKS DB
ASVSNPLFL	29.22	946.512	9	4.3	474.264	70.49	292.83	1076.6		591.33		734.57	2	F2:11802	20150812RA rerun MIN6N8_AGE-BSA Db pooled.wiff	4	1	1	0	1	0	1	P70428			PEAKS DB
AAPRSFIFL	23.2	1020.58	9	6	511.297	71.46		1442.5	1381.7	923.37			4	F4:11100	20150812RA rerun MIN6N8_BSA Db pooled.wiff	3	0	1	1	1	0	0	Q3UIK4			PEAKS DB
VSLLDIDHL	32.08	1023.56	9	2.8	512.787	72.04	116.13	459.31	387.93	210.88	0		1	F1:10208	20150812RA rerun MIN6N8_AGE-BSA ALT Db pooled.wiff	4	1	1	1	1	0	0	Q8BQM4			PEAKS DB
YQLLLKEML	33.79	1149.65	9	0.8	575.829	73.82	246.29	383.44	64.045	139.84	206.93		1	F1:10305	20150812RA rerun MIN6N8_AGE-BSA ALT Db pooled.wiff	5	1	1	1	1	1	0	Q64096			PEAKS DB
SAIFNFQSL	39.29	1025.52	9	4.6	513.768	78.52	393.03		311.1	371.59	519.15		5	F5:12421	20150812RA rerun MIN6N8_Recon ALT Db pooled.wiff	4	1	0	1	1	1	0	Q9CR64			PEAKS DB
YTVANKEYV	33.07	1085.54	9	-2.1	543.774	39.03	0	79.615	0			0	3	F3:8191	20150812RA rerun MIN6N8_BSA ALT Db pooled.wiff	1	0	1	0	0	0	0	Q9DC16			PEAKS DB
SQLVKVDEV	37.68	1015.55	9	-0.1	508.783	43.83	149.23	154.53	0	98.367	43.963		1	F1:7252	20150812RA rerun MIN6N8_AGE-BSA ALT Db pooled.wiff	4	1	1	0	1	1	0	Q8R4G9			PEAKS DB
TSVENHEFL	49.38	1074.5	9	-1.7	538.254	46.62	0	143.71	0		0	0	3	F3:8939	20150812RA rerun MIN6N8_BSA ALT Db pooled.wiff	1	0	1	0	0	0	0	Q8CJF7			PEAKS DB
AAVENVSEL	23.67	930.466	9	-5.5	466.236	47.43	0		0			0	3	F3:9004	20150812RA rerun MIN6N8_BSA ALT Db pooled.wiff	0	0	0	0	0	0	0	E9Q6J5			PEAKS DB
RAIENIDTL	23.67	1043.56	9	0.9	522.787	47.68			0		401.62	447.28	3	F3:9022	20150812RA rerun MIN6N8_BSA ALT Db pooled.wiff	2	0	0	0	0	1	1	Q3UM45			PEAKS DB
FSNVNLKEV	49.4	1048.56	9	-0.8	525.283	48.05			0	93.71	0		3	F3:9053	20150812RA rerun MIN6N8_BSA ALT Db pooled.wiff	1	0	0	0	1	0	0	Q3U1J4			PEAKS DB
YVHVNQYDI	20.9	1149.55	9	0.2	575.778	48.98			0				3	F3:9153	20150812RA rerun MIN6N8_BSA ALT Db pooled.wiff	0	0	0	0	0	0	0	Q9JIF7			PEAKS DB
SHVTNVDFL	26.86	1030.51	9	3.2	516.261	54.67		254.11	0		129.03		3	F3:9851	20150812RA rerun MIN6N8_BSA ALT Db pooled.wiff	2	0	1	0	0	1	0	Q05BC3			PEAKS DB
NCLLHAASL	33.33	940.48	9	8.1	471.25	57.91			0				3	F3:10446	20150812RA rerun MIN6N8_BSA ALT Db pooled.wiff	0	0	0	0	0	0	0	B2RUR8:Q8R554			PEAKS DB
AAVLNPRFL	23.65	999.587	9	-1.7	500.798	59.6			0	73.756	0		5	F5:11002	20150812RA rerun MIN6N8_Recon ALT Db pooled.wiff	1	0	0	0	1	0	0	Q7TPS5			PEAKS DB
LQLLNTDYL	20.44	1091.59	9	-0.9	546.798	75.57			0				3	F3:12577	20150812RA rerun MIN6N8_BSA ALT Db pooled.wiff	0	0	0	0	0	0	0	Q9R0L6			PEAKS DB
SQPVNPHSL	37.5	977.493	9	2.5	489.754	33.81	103.29	28.124				54.383	2	F2:6373	20150812RA rerun MIN6N8_AGE-BSA Db pooled.wiff	3	1	1	0	0	0	1	Q3UHH1			PEAKS DB
SSIENM(+15.99)ENI	27.65	1051.45	9	-1.1	526.731	38.53	72.603	148.34		16.713	0	105.04	6	F6:7785	20150812RA rerun MIN6N8_UT Db pooled.wiff	4	1	1	0	1	0	1	O08576	Oxidation (M)	M6:Oxidation (M):1000.00	PEAKS DB
QTVENVEHL	22.5	1067.52	9	3.2	534.77	40.34	42.053	182.88					2	F2:7140	20150812RA rerun MIN6N8_AGE-BSA Db pooled.wiff	2	1	1	0	0	0	0	Q91V83			PEAKS DB
SNVVNQANL	40.62	957.488	9	4.6	479.752	40.93	62.534	93.21		0		120.36	2	F2:7176	20150812RA rerun MIN6N8_AGE-BSA Db pooled.wiff	3	1	1	0	0	0	1	Q8BTG7			PEAKS DB
SAVIQNKQL	24.93	999.571	9	-0.6	500.791	41.38	199.39	153.09		85.427			2	F2:7198	20150812RA rerun MIN6N8_AGE-BSA Db pooled.wiff	3	1	1	0	1	0	0	Q9CZQ9			PEAKS DB
TGVTNRDLI	20.78	987.535	9	-0.7	494.772	41.85	51.981	34.461					1	F1:7132	20150812RA rerun MIN6N8_AGE-BSA ALT Db pooled.wiff	2	1	1	0	0	0	0	Q6DFV3			PEAKS DB
VQVENPERF	28.7	1116.56	9	4	559.285	42.5	56.936	81.326		0			1	F1:7171	20150812RA rerun MIN6N8_AGE-BSA ALT Db pooled.wiff	2	1	1	0	0	0	0	Q8C006			PEAKS DB
YAIKNIHGI	34.25	1027.58	9	4.4	514.799	43.7	65.273	68.398			0		5	F5:9494	20150812RA rerun MIN6N8_Recon ALT Db pooled.wiff	2	1	1	0	0	0	0	Q8BZ98:P39053			PEAKS DB
LAIRNDEEL	28.22	1071.56	9	-1.8	536.783	44.25		380.32		260.8	22.875		4	F4:7704	20150812RA rerun MIN6N8_BSA Db pooled.wiff	3	0	1	0	1	1	0	Q8CGP6:Q8R1M2:Q64523:C0HKE8:C0HKE3:C0HKE6:C0HKE2:C0HKE7:Q8CGP5:Q8CGP7:C0HKE4:C0HKE9:C0HKE5:Q8BFU2:Q6GSS7:C0HKE1:P27661			PEAKS DB
ASLVNADKL	37.01	929.518	9	-0.2	465.764	44.54	71.547	65.715					1	F1:7305	20150812RA rerun MIN6N8_AGE-BSA ALT Db pooled.wiff	2	1	1	0	0	0	0	P59016			PEAKS DB
NDKNLIPTI	22.86	1026.57	9	-19.7	514.281	46.22		667.98					2	F2:7631	20150812RA rerun MIN6N8_AGE-BSA Db pooled.wiff	1	0	1	0	0	0	0	O88819			PEAKS DB
VSLVKTETL	30.4	988.58	9	3.6	495.298	46.49	94.877	93.103			45.034	36.679	5	F5:9710	20150812RA rerun MIN6N8_Recon ALT Db pooled.wiff	4	1	1	0	0	1	1	Q3UNH4			PEAKS DB
SGPQNKFEL	46.14	1018.51	9	0.6	510.262	47.38	273.25	492.17		178.64	212.58	344.32	6	F6:8579	20150812RA rerun MIN6N8_UT Db pooled.wiff	5	1	1	0	1	1	1	Q8VHP6			PEAKS DB
SAVVDKDFL	37.4	992.518	9	1.5	497.266	52	559.23	2241.2		959.79	940.02	0	2	F2:8400	20150812RA rerun MIN6N8_AGE-BSA Db pooled.wiff	4	1	1	0	1	1	0	P55264			PEAKS DB
SSIENMENI	15.29	1035.45	9	2.6	518.734	52.51	608.4						1	F1:8212	20150812RA rerun MIN6N8_AGE-BSA ALT Db pooled.wiff	1	1	0	0	0	0	0	O08576			PEAKS DB
VSYRNIEEL	43.82	1121.57	9	-0.7	561.791	52.63	118.87	527.02		470.88	190.95		2	F2:8501	20150812RA rerun MIN6N8_AGE-BSA Db pooled.wiff	4	1	1	0	1	1	0	F6ZDS4			PEAKS DB
SGLTM(+15.99)ITHL	30.12	987.506	9	0.9	494.76	53.3	337.36	735.61			374.38		5	F5:10391	20150812RA rerun MIN6N8_Recon ALT Db pooled.wiff	3	1	1	0	0	1	0	Q5U4C1	Oxidation (M)	M5:Oxidation (M):1000.00	PEAKS DB
SAVPNQISI	18.59	927.503	9	3.8	464.758	54.05	147.19	88.406					1	F1:8432	20150812RA rerun MIN6N8_AGE-BSA ALT Db pooled.wiff	2	1	1	0	0	0	0	Q8C5D8			PEAKS DB
VAHTCFNQL	15.18	1031.49	9	17.6	516.757	55.52	15464						1	F1:8541	20150812RA rerun MIN6N8_AGE-BSA ALT Db pooled.wiff	1	1	0	0	0	0	0	Q8CDU6			PEAKS DB
YQPYNKDWI	18.4	1225.58	9	2.1	613.795	56.26	2105	8769.5					2	F2:9188	20150812RA rerun MIN6N8_AGE-BSA Db pooled.wiff	2	1	1	0	0	0	0	P84089			PEAKS DB
SSPVNPVVF	22.31	944.497	9	-0.6	473.254	60.3	658.89				606.31		5	F5:11042	20150812RA rerun MIN6N8_Recon ALT Db pooled.wiff	2	1	0	0	0	1	0	Q9D868			PEAKS DB
AALQNLVKI	43.57	968.602	9	0.7	485.307	60.71	151.59	678.89		237.17	153.04		2	F2:10178	20150812RA rerun MIN6N8_AGE-BSA Db pooled.wiff	4	1	1	0	1	1	0	P70168			PEAKS DB
AALQNLEQL	23.57	998.54	9	2.6	500.277	61.51	259.95	1269.5			377.54		2	F2:10315	20150812RA rerun MIN6N8_AGE-BSA Db pooled.wiff	3	1	1	0	0	1	0	Q9WTK5			PEAKS DB
YGIRNSLLI	28	1047.61	9	-1.5	524.81	61.99	1154.1	3334.2			1925.2	920.67	6	F6:9804	20150812RA rerun MIN6N8_UT Db pooled.wiff	4	1	1	0	0	1	1	P07742			PEAKS DB
KYLILLQEM(+15.99)	18.04	1165.64	9	2.8	583.827	62.54	643.03						1	F1:9443	20150812RA rerun MIN6N8_AGE-BSA ALT Db pooled.wiff	1	1	0	0	0	0	0	Q3U0J8	Oxidation (M)	M9:Oxidation (M):1000.00	PEAKS DB
YQLLLKEM(+15.99)L	19.35	1165.64	9	2.8	583.827	62.54	643.03						1	F1:9451	20150812RA rerun MIN6N8_AGE-BSA ALT Db pooled.wiff	1	1	0	0	0	0	0	Q64096	Oxidation (M)	M8:Oxidation (M):1000.00	PEAKS DB
TAPVNIAVI	20.56	896.533	9	-7.9	449.27	62.67						309.33	6	F6:9856	20150812RA rerun MIN6N8_UT Db pooled.wiff	1	0	0	0	0	0	1	Q99JF5			PEAKS DB
CSLQNKLVI	32.35	1016.57	9	4.2	509.293	62.89	193.12	557.82			188.23		2	F2:10621	20150812RA rerun MIN6N8_AGE-BSA Db pooled.wiff	3	1	1	0	0	1	0	Q9CQU5			PEAKS DB
TWQLNGEEL	24.72	1088.51	9	2	545.263	65.12	138.5						1	F1:9660	20150812RA rerun MIN6N8_AGE-BSA ALT Db pooled.wiff	1	1	0	0	0	0	0	P01899			PEAKS DB
TGKQRVPTG	18.74	942.525	9	40.8	472.287	67.22	8825.9						1	F1:9888	20150812RA rerun MIN6N8_AGE-BSA ALT Db pooled.wiff	1	1	0	0	0	0	0	Q8BR86			PEAKS DB
GAPLNLVDL	20.56	910.512	9	3.6	456.263	73.5	269.55	880.6				0	1	F1:10301	20150812RA rerun MIN6N8_AGE-BSA ALT Db pooled.wiff	2	1	1	0	0	0	0	Q9QWT9			PEAKS DB
FSEENHEPL	35.12	1100.48	9	4.7	551.247	38.81	0	379.12					2	F2:7050	20150812RA rerun MIN6N8_AGE-BSA Db pooled.wiff	1	0	1	0	0	0	0	Q9EQH3			PEAKS DB
AAVIDQERL	24.99	1013.55	9	-2.3	507.779	42.37	0	28.519					1	F1:7162	20150812RA rerun MIN6N8_AGE-BSA ALT Db pooled.wiff	1	0	1	0	0	0	0	Q80UW5			PEAKS DB
PTQASPPPL	16.66	906.481	9	6.3	907.49	59.61	0						1	F1:9126	20150812RA rerun MIN6N8_AGE-BSA ALT Db pooled.wiff	0	0	0	0	0	0	0	Q9R1L5			PEAKS DB
AALLNTDLV	20.45	928.523	9	-0.9	465.267	65.58					0		5	F5:11440	20150812RA rerun MIN6N8_Recon ALT Db pooled.wiff	0	0	0	0	0	0	0	Q91WM3			PEAKS DB
VAPLNLGM(+15.99)I	25.38	942.521	9	-19.5	472.257	65.8		603.32					2	F2:11298	20150812RA rerun MIN6N8_AGE-BSA Db pooled.wiff	1	0	1	0	0	0	0	Q6P4T2	Oxidation (M)	M8:Oxidation (M):1000.00	PEAKS DB
ATAPATAAT	15	773.392	9	-3.6	774.393	83.46	0						1	F1:11172	20150812RA rerun MIN6N8_AGE-BSA ALT Db pooled.wiff	0	0	0	0	0	0	0	Q64519			PEAKS DB
VSPVNENQI	21.01	998.503	9	8.5	500.262	41.04		27.061					2	F2:7185	20150812RA rerun MIN6N8_AGE-BSA Db pooled.wiff	1	0	1	0	0	0	0	Q99K46			PEAKS DB
SAVKNLQQL	20.66	999.571	9	-0.6	500.791	41.38		153.09					2	F2:7196	20150812RA rerun MIN6N8_AGE-BSA Db pooled.wiff	1	0	1	0	0	0	0	Q8VIJ8			PEAKS DB
IEEVEEKRK(+114.04)	20.6	1272.67	9	-34.1	637.318	42.92		952.18				160.13	2	F2:7292	20150812RA rerun MIN6N8_AGE-BSA Db pooled.wiff	2	0	1	0	0	0	1	Q0VGU4	Ubiquitin	K9:Ubiquitin:11.10	PEAKS PTM
ASPEGQDYL	18.77	978.429	9	4.2	490.223	45.04		361.18					2	F2:7464	20150812RA rerun MIN6N8_AGE-BSA Db pooled.wiff	1	0	1	0	0	0	0	Q99LF4			PEAKS DB
IM(+15.99)NPASKVI	16.59	987.542	9	-15.9	494.769	45.71		1924.5					2	F2:7651	20150812RA rerun MIN6N8_AGE-BSA Db pooled.wiff	1	0	1	0	0	0	0	Q68FD5	Oxidation (M)	M2:Oxidation (M):1000.00	PEAKS DB
ISPENHISL	18.06	1008.52	9	2.6	505.269	47.18		629.66					2	F2:7728	20150812RA rerun MIN6N8_AGE-BSA Db pooled.wiff	1	0	1	0	0	0	0	Q9WTX2			PEAKS DB
AIVGQAQEI	16.51	927.503	9	-2	464.757	47.75		137.22				72.438	2	F2:7795	20150812RA rerun MIN6N8_AGE-BSA Db pooled.wiff	2	0	1	0	0	0	1	Q80XP9			PEAKS DB
VDGINEPDI	20.91	970.461	9	4.3	486.239	52		1438.1					2	F2:8399	20150812RA rerun MIN6N8_AGE-BSA Db pooled.wiff	1	0	1	0	0	0	0	Q8K1R3			PEAKS DB
VM(+15.99)VTNVTSL	21.2	978.506	9	1.8	490.26	52.63		789.48			299.75		2	F2:8497	20150812RA rerun MIN6N8_AGE-BSA Db pooled.wiff	2	0	1	0	0	1	0	P26039	Oxidation (M)	M2:Oxidation (M):1000.00	PEAKS DB
SGLLNQQSL	32.15	958.508	9	7.4	480.264	53.75		407.85			220.81		5	F5:10455	20150812RA rerun MIN6N8_Recon ALT Db pooled.wiff	2	0	1	0	0	1	0	Q9DB40			PEAKS DB
ALQEESRYL	18.23	1107.56	9	-41.4	554.761	56.15		38660					2	F2:9078	20150812RA rerun MIN6N8_AGE-BSA Db pooled.wiff	1	0	1	0	0	0	0	Q91ZR3			PEAKS DB
AALQNAVAF	16.26	903.481	9	2.1	452.748	57.11		276.44					2	F2:9333	20150812RA rerun MIN6N8_AGE-BSA Db pooled.wiff	1	0	1	0	0	0	0	Q80VI1			PEAKS DB
PLNPVRVHI	29.9	1043.62	9	4.8	522.821	58.43		620.45					2	F2:9693	20150812RA rerun MIN6N8_AGE-BSA Db pooled.wiff	1	0	1	0	0	0	0	O35737:Q9Z2X1			PEAKS DB
SALVSSLHL	25.88	925.523	9	2.3	463.769	60.43		120.87		37.221			2	F2:10125	20150812RA rerun MIN6N8_AGE-BSA Db pooled.wiff	2	0	1	0	1	0	0	Q9QZE5			PEAKS DB
ATIINEEVL	21.81	1000.54	9	-4.4	501.277	61.07				2306.9	1398	764	6	F6:9753	20150812RA rerun MIN6N8_UT Db pooled.wiff	3	0	0	0	1	1	1	P14576			PEAKS DB
KSIVNQVFL	20.74	1046.61	9	0.7	524.313	61.11		271.57					2	F2:10255	20150812RA rerun MIN6N8_AGE-BSA Db pooled.wiff	1	0	1	0	0	0	0	Q9DCN7			PEAKS DB
VDVTNTTFL	16.38	1008.51	9	-2.6	505.262	62.27				642.65		106.47	6	F6:9823	20150812RA rerun MIN6N8_UT Db pooled.wiff	2	0	0	0	1	0	1	O89079			PEAKS DB
NALGVVPYL	27.26	944.533	9	-38.4	473.254	62.34				1510.9			4	F4:10267	20150812RA rerun MIN6N8_BSA Db pooled.wiff	1	0	0	0	1	0	0	Q61850			PEAKS DB
YGLLNVTKI	36.25	1019.6	9	1.8	510.808	64.03		334.85					2	F2:10817	20150812RA rerun MIN6N8_AGE-BSA Db pooled.wiff	1	0	1	0	0	0	0	Q8C0D4			PEAKS DB
VGVNNPVFL	16.01	957.528	9	1	479.771	66.09		1259.8					2	F2:11179	20150812RA rerun MIN6N8_AGE-BSA Db pooled.wiff	1	0	1	0	0	0	0	Q9DBN5			PEAKS DB
SSIVNS(-18.01)IQV	21.73	927.503	9	0.8	464.758	68.2		483.28					2	F2:11507	20150812RA rerun MIN6N8_AGE-BSA Db pooled.wiff	1	0	1	0	0	0	0	Q99PL5	Dehydration	S6:Dehydration:39.19	PEAKS PTM
HGLENLEFL	21.56	1070.54	9	2	536.277	68.2		89.465			76.478		2	F2:11531	20150812RA rerun MIN6N8_AGE-BSA Db pooled.wiff	2	0	1	0	0	1	0	Q8C110			PEAKS DB
QCLLNVEHL	26.07	1067.54	9	-1.4	534.777	68.66		185.71					2	F2:11593	20150812RA rerun MIN6N8_AGE-BSA Db pooled.wiff	1	0	1	0	0	0	0	Q78PY7			PEAKS DB
FALINKLDI	31.09	1045.62	9	1	523.815	70.71		88.496					2	F2:11832	20150812RA rerun MIN6N8_AGE-BSA Db pooled.wiff	1	0	1	0	0	0	0	Q9Z2A5			PEAKS DB
SGVWNVTEL	17.55	1003.5	9	7.8	502.759	71.45		304.81					2	F2:11894	20150812RA rerun MIN6N8_AGE-BSA Db pooled.wiff	1	0	1	0	0	0	0	P70257			PEAKS DB
FQFINPTTI	23.92	1079.57	9	0.2	540.789	75.18		95.921					2	F2:12162	20150812RA rerun MIN6N8_AGE-BSA Db pooled.wiff	1	0	1	0	0	0	0	Q8C0M0			PEAKS DB
AVVLNATWL	16.4	985.56	9	-0.9	493.785	76.4					0		5	F5:12247	20150812RA rerun MIN6N8_Recon ALT Db pooled.wiff	0	0	0	0	0	0	0	P13011			PEAKS DB
SALINLVEF	19.17	1004.55	9	5.3	503.286	82.99		178.08		73.005			2	F2:12732	20150812RA rerun MIN6N8_AGE-BSA Db pooled.wiff	2	0	1	0	1	0	0	P97313			PEAKS DB
YAPINANAI	16.13	945.492	9	0.2	473.752	52.29		0					2	F2:8458	20150812RA rerun MIN6N8_AGE-BSA Db pooled.wiff	0	0	0	0	0	0	0	Q9R190			PEAKS DB
QYDPEQLDL	27.46	1119.51	9	3.9	560.762	60.05		0					2	F2:10040	20150812RA rerun MIN6N8_AGE-BSA Db pooled.wiff	0	0	0	0	0	0	0	Q9JKF6			PEAKS DB
AALLNQQFL	15.63	1016.57	9	-9.6	509.284	69.3		0					2	F2:11683	20150812RA rerun MIN6N8_AGE-BSA Db pooled.wiff	0	0	0	0	0	0	0	P48455			PEAKS DB
TGILNVDEF	22.15	1006.5	9	3.2	504.256	71.31		0			288.37	126.34	5	F5:11913	20150812RA rerun MIN6N8_Recon ALT Db pooled.wiff	2	0	0	0	0	1	1	P84075			PEAKS DB
VAVVNKVDI	23.35	955.57	9	8.5	478.795	46.07				47.872			4	F4:7857	20150812RA rerun MIN6N8_BSA Db pooled.wiff	1	0	0	0	1	0	0	O35604			PEAKS DB
SSIVNSIQV	35.26	945.513	9	2.1	473.764	57.39				147.01			4	F4:9551	20150812RA rerun MIN6N8_BSA Db pooled.wiff	1	0	0	0	1	0	0	Q99PL5			PEAKS DB
SAPEILLSL	15.78	941.543	9	14.4	471.784	57.96				2832.1			4	F4:9599	20150812RA rerun MIN6N8_BSA Db pooled.wiff	1	0	0	0	1	0	0	S4R2P9			PEAKS DB
ASM(+15.99)INVEYL	18.22	1054.5	9	0.4	528.256	60.69				181.18			4	F4:10007	20150812RA rerun MIN6N8_BSA Db pooled.wiff	1	0	0	0	1	0	0	O88491	Oxidation (M)	M3:Oxidation (M):1000.00	PEAKS DB
TLPSGSPPG	19.84	811.408	9	5	406.712	61.83				298.08			4	F4:10161	20150812RA rerun MIN6N8_BSA Db pooled.wiff	1	0	0	0	1	0	0	Q8BHE4			PEAKS DB
TALVGSGAH	18.02	811.419	9	-8.9	406.712	61.83				298.08			4	F4:10171	20150812RA rerun MIN6N8_BSA Db pooled.wiff	1	0	0	0	1	0	0	Q99LW0			PEAKS DB
SLPTNLIHL	17.69	1006.58	9	6.8	504.3	67.41				172.37			4	F4:10781	20150812RA rerun MIN6N8_BSA Db pooled.wiff	1	0	0	0	1	0	0	Q6WKZ8			PEAKS DB
SSLVLKELL	33.37	1000.62	9	-2.5	501.313	68.73				88.347	68.785		5	F5:11740	20150812RA rerun MIN6N8_Recon ALT Db pooled.wiff	2	0	0	0	1	1	0	Q52KR3			PEAKS DB
YAVPDKINQ	15.58	1046.54	9	-38.2	524.256	48.01				0			4	F4:8115	20150812RA rerun MIN6N8_BSA Db pooled.wiff	0	0	0	0	0	0	0	Q9EQH2			PEAKS DB
FKLWVTVST	17.64	1079.6	9	9.7	540.812	66.58				0			4	F4:10681	20150812RA rerun MIN6N8_BSA Db pooled.wiff	0	0	0	0	0	0	0	O70394			PEAKS DB
YLVLKSSSY	18.76	1058.56	9	40	530.309	69.21				0			4	F4:10950	20150812RA rerun MIN6N8_BSA Db pooled.wiff	0	0	0	0	0	0	0	A2A690			PEAKS DB
YGINNIREL	22.51	1090.58	9	-3	546.293	56.76					6.6112		5	F5:10794	20150812RA rerun MIN6N8_Recon ALT Db pooled.wiff	1	0	0	0	0	1	0	Q8C0C7			PEAKS DB
MVIKEIVEG	17.22	1016.56	9	13.6	509.292	62.99					188.23		5	F5:11262	20150812RA rerun MIN6N8_Recon ALT Db pooled.wiff	1	0	0	0	0	1	0	Q9EQB9			PEAKS DB
STIRLLTSL	26.43	1002.61	9	-2	502.309	65.62					56.958		5	F5:11444	20150812RA rerun MIN6N8_Recon ALT Db pooled.wiff	1	0	0	0	0	1	0	P80318			PEAKS DB
QQLIVKYDL	15.22	1118.63	9	0.4	560.323	67.37					237.43		5	F5:11613	20150812RA rerun MIN6N8_Recon ALT Db pooled.wiff	1	0	0	0	0	1	0	Q6P1E8			PEAKS DB
SSVLNLTEL	23.84	974.528	9	2.4	488.273	72.45						42.107	6	F6:10493	20150812RA rerun MIN6N8_UT Db pooled.wiff	1	0	0	0	0	0	1	Q8BW56			PEAKS DB
SKVQQASLP	19.71	956.529	9	-29.5	479.258	49.38						0	6	F6:8797	20150812RA rerun MIN6N8_UT Db pooled.wiff	0	0	0	0	0	0	0	Q3TZ89			PEAKS DB
SALRHYINL(-.98)	18	1084.61	9	-25	543.299	48.72					0		5	F5:9901	20150812RA rerun MIN6N8_Recon ALT Db pooled.wiff	0	0	0	0	0	0	0	P57774	Amidation	L9:Amidation:1000.00	PEAKS PTM
YGISNEKPEV	65.78	1134.56	10	2.3	568.285	41.15		291.7	45.606	0		86.702	2	F2:7186	20150812RA rerun MIN6N8_AGE-BSA Db pooled.wiff	3	0	1	1	0	0	1	Q8K2T8			PEAKS DB
SSIQNGKYTL	51.99	1109.57	10	2.6	555.793	42	322.88	188.36	73.65	96.21			3	F3:8574	20150812RA rerun MIN6N8_BSA ALT Db pooled.wiff	4	1	1	1	1	0	0	Q3UWM4			PEAKS DB
IQKTPQIQVY	58.97	1216.68	10	-3.9	609.344	46.21	125.45		202.64	207.94		512.43	3	F3:8914	20150812RA rerun MIN6N8_BSA ALT Db pooled.wiff	4	1	0	1	1	0	1	P01887			PEAKS DB
YAGSNFPEHI	62.18	1133.51	10	4.6	567.765	49.64	2149.1	3173.4	2948.2	1173.1	2539.6	407.89	3	F3:9202	20150812RA rerun MIN6N8_BSA ALT Db pooled.wiff	6	1	1	1	1	1	1	P61161			PEAKS DB
SAHQNYAEW(+15.99)L	21.52	1233.54	10	-2.5	617.775	57.19			359.92		95.139		5	F5:10826	20150812RA rerun MIN6N8_Recon ALT Db pooled.wiff	3	0	0	2	0	1	0	Q99PL5	Oxidation (HW)	W9:Oxidation (HW):90.32	PEAKS PTM
VSPRNSLEVL	24.79	1112.62	10	3.4	557.317	50.76		185.3	330.91				2	F2:8224	20150812RA rerun MIN6N8_AGE-BSA Db pooled.wiff	2	0	1	1	0	0	0	A2AKB9			PEAKS DB
ALIAGGGAPE	15.87	854.45	10	2.5	428.232	51			478.24				3	F3:9350	20150812RA rerun MIN6N8_BSA ALT Db pooled.wiff	1	0	0	1	0	0	0	P80315			PEAKS DB
SNLSNYHQYI	19.67	1237.57	10	4.8	619.795	51.14			43.098				3	F3:9377	20150812RA rerun MIN6N8_BSA ALT Db pooled.wiff	1	0	0	1	0	0	0	Q91XU3			PEAKS DB
KYSYTIEPNQ	17.49	1241.59	10	-16.4	621.791	51.91			395.17				3	F3:9454	20150812RA rerun MIN6N8_BSA ALT Db pooled.wiff	1	0	0	1	0	0	0	Q5EBI0			PEAKS DB
YTVENAKDII	44.86	1164.6	10	-3.7	583.304	52.18	17.907	739.32	601.31	1062.1	0		1	F1:8195	20150812RA rerun MIN6N8_AGE-BSA ALT Db pooled.wiff	4	1	1	1	1	0	0	P32921			PEAKS DB
YGFRDPGPQL	40.24	1148.56	10	6.5	575.29	52.77	463.57	716.66	893.93	319.4	0		5	F5:10359	20150812RA rerun MIN6N8_Recon ALT Db pooled.wiff	4	1	1	1	1	0	0	P26339			PEAKS DB
VDREETPSFL	25.92	1191.58	10	-12.9	596.786	52.94			10202				3	F3:9629	20150812RA rerun MIN6N8_BSA ALT Db pooled.wiff	1	0	0	1	0	0	0	O35902			PEAKS DB
SSIINFGALI	16.07	1033.58	10	7.7	517.8	52.95			88.278				3	F3:9618	20150812RA rerun MIN6N8_BSA ALT Db pooled.wiff	1	0	0	1	0	0	0	Q80W93			PEAKS DB
RSPENVIETI	25.21	1156.61	10	0.9	579.31	53.52	265.37	991.99	1184.7	470.86			3	F3:9667	20150812RA rerun MIN6N8_BSA ALT Db pooled.wiff	4	1	1	1	1	0	0	E9PVA8			PEAKS DB
AYEGRDYIAL	41.72	1169.57	10	-1.8	585.79	54.67	1085.3	3473.7	3391.1	380.2	1148.6	204.79	1	F1:8477	20150812RA rerun MIN6N8_AGE-BSA ALT Db pooled.wiff	6	1	1	1	1	1	1	P01899			PEAKS DB
GNLWATGHFM(+15.99)	50.4	1148.51	10	5.4	575.262	55.05	93.362	273.22	507.23		139.38		3	F3:9886	20150812RA rerun MIN6N8_BSA ALT Db pooled.wiff	4	1	1	1	0	1	0	Q9CR53	Oxidation (M)	M10:Oxidation (M):1000.00	PEAKS DB
LDMHSLPSNP	22.43	1109.52	10	36.6	555.784	55.28			5843.2				3	F3:9959	20150812RA rerun MIN6N8_BSA ALT Db pooled.wiff	1	0	0	1	0	0	0	Q6SJ95			PEAKS DB
SAPRNFVENF	62.33	1179.57	10	2.3	590.79	55.28	22348	59558	65476	21342	25643	33695	3	F3:9994	20150812RA rerun MIN6N8_BSA ALT Db pooled.wiff	6	1	1	1	1	1	1	Q91WG4			PEAKS DB
VTSSRFSAGL	17.45	1023.53	10	-43	512.751	55.9			90.591				3	F3:10055	20150812RA rerun MIN6N8_BSA ALT Db pooled.wiff	1	0	0	1	0	0	0	Q6IFX2			PEAKS DB
SGPTNEDLYI	18.9	1107.51	10	1.6	554.761	56.15		38660				16471	2	F2:9093	20150812RA rerun MIN6N8_AGE-BSA Db pooled.wiff	2	0	1	0	0	0	1	Q01237			PEAKS DB
VAPSTPEEYL	31.32	1104.53	10	-1.9	553.273	56.43						0	6	F6:9402	20150812RA rerun MIN6N8_UT Db pooled.wiff	0	0	0	0	0	0	0	Q9NWG9			PEAKS DB
LSILNSNEHL	42.5	1138.6	10	-1.8	570.303	56.3	278.69	1153.4	955.74	528.98	395.17		3	F3:10135	20150812RA rerun MIN6N8_BSA ALT Db pooled.wiff	5	1	1	1	1	1	0	Q8BMK0			PEAKS DB
SAIHNFYDNI	26.75	1192.55	10	5.6	597.285	56.32		853	320.52		171.01		2	F2:9180	20150812RA rerun MIN6N8_AGE-BSA Db pooled.wiff	3	0	1	1	0	1	0	Q99K90			PEAKS DB
NQLQNYRNYL	24.86	1324.65	10	4.1	663.335	56.43		267.77			68.325		2	F2:9196	20150812RA rerun MIN6N8_AGE-BSA Db pooled.wiff	2	0	1	0	0	1	0	P70399			PEAKS DB
KAILNGIDSI	38.86	1042.6	10	2.1	522.308	56.85	84.845	717.49		296.12	234.32		5	F5:10800	20150812RA rerun MIN6N8_Recon ALT Db pooled.wiff	4	1	1	0	1	1	0	Q9CW03			PEAKS DB
FVISNYREQL	20.8	1267.66	10	1.3	634.834	56.94	78.98			208.73			4	F4:9502	20150812RA rerun MIN6N8_BSA Db pooled.wiff	2	1	0	0	1	0	0	Q3UJC8			PEAKS DB
FSPTNPAHLL	29.48	1095.57	10	-3.7	548.79	57.53			681.13		204.78		5	F5:10856	20150812RA rerun MIN6N8_Recon ALT Db pooled.wiff	2	0	0	1	0	1	0	A6PWY4			PEAKS DB
SFARAPQLDL	36.52	1116.59	10	-0.7	559.302	57.71		0	224.93		1041.5		2	F2:9509	20150812RA rerun MIN6N8_AGE-BSA Db pooled.wiff	2	0	0	1	0	1	0	P16014			PEAKS DB
SQPESKVFYL	27.88	1196.61	10	-2.8	599.307	57.95			234.82				3	F3:10419	20150812RA rerun MIN6N8_BSA ALT Db pooled.wiff	1	0	0	1	0	0	0	P63101			PEAKS DB
TNPESKVFYL	24.72	1196.61	10	-4.4	599.307	57.92					82.118		5	F5:10887	20150812RA rerun MIN6N8_Recon ALT Db pooled.wiff	1	0	0	0	0	1	0	P68254			PEAKS DB
ASLVNSPSYL	45.92	1049.54	10	0.2	525.776	58.31		303.45	213.87				2	F2:9669	20150812RA rerun MIN6N8_AGE-BSA Db pooled.wiff	2	0	1	1	0	0	0	Q3U3D7			PEAKS DB
SAHQNYAEWL	34.94	1217.55	10	3.3	609.781	59.4	1205	3783	2326.8	949.3	1418.2	0	5	F5:10975	20150812RA rerun MIN6N8_Recon ALT Db pooled.wiff	5	1	1	1	1	1	0	Q99PL5			PEAKS DB
AAPPPGIVEI	35.38	962.544	10	10.2	482.283	59.97	0	396.56		0	0		2	F2:9983	20150812RA rerun MIN6N8_AGE-BSA Db pooled.wiff	1	0	1	0	0	0	0	E9Q7E2			PEAKS DB
MPLVGALSIF	16.16	1046.58	10	26.6	524.311	61.22			306.36				3	F3:11037	20150812RA rerun MIN6N8_BSA ALT Db pooled.wiff	1	0	0	1	0	0	0	Q3TZZ7			PEAKS DB
NSIKNGILYL	35.68	1133.64	10	0.2	567.828	62.13		334.24	324.91	144	156.09		3	F3:11179	20150812RA rerun MIN6N8_BSA ALT Db pooled.wiff	4	0	1	1	1	1	0	Q62077			PEAKS DB
NQFVNKFNVL	47.48	1221.65	10	0.5	611.831	62.36		607.92	211.45	130.03	110.3		3	F3:11252	20150812RA rerun MIN6N8_BSA ALT Db pooled.wiff	4	0	1	1	1	1	0	O88545			PEAKS DB
SAIFNNVM(+15.99)TL	20.92	1124.55	10	3.7	563.285	63.56		758.17					2	F2:10726	20150812RA rerun MIN6N8_AGE-BSA Db pooled.wiff	1	0	1	0	0	0	0	Q9JIM1	Oxidation (M)	M8:Oxidation (M):1000.00	PEAKS DB
DPNRESLDFL	22.87	1204.57	10	2.6	603.293	64.15	85.976						1	F1:9599	20150812RA rerun MIN6N8_AGE-BSA ALT Db pooled.wiff	1	1	0	0	0	0	0	P12968			PEAKS DB
SAVRNGLLLL	19.6	1054.65	10	0.9	528.331	65.63		864.82			541.24		2	F2:11093	20150812RA rerun MIN6N8_AGE-BSA Db pooled.wiff	2	0	1	0	0	1	0	Q80TT8			PEAKS DB
TSPTNFPAVL	16.72	1045.54	10	3.3	523.78	65.63		641.38					2	F2:11092	20150812RA rerun MIN6N8_AGE-BSA Db pooled.wiff	1	0	1	0	0	0	0	P41234			PEAKS DB
SQPGPRLPFI	20.86	1110.62	10	3.8	556.317	67.26		486.89	428.5		395.51		5	F5:11587	20150812RA rerun MIN6N8_Recon ALT Db pooled.wiff	3	0	1	1	0	1	0	Q921N8			PEAKS DB
SSIVNSIQVL	31.51	1058.6	10	3	530.306	68.14	1041	3801.3	2003.2	1777.2		992.27	4	F4:10826	20150812RA rerun MIN6N8_BSA Db pooled.wiff	5	1	1	1	1	0	1	Q99PL5			PEAKS DB
TAIENSWIHL	42.81	1182.6	10	1.6	592.308	68.83		487.14	442.37			0	2	F2:11631	20150812RA rerun MIN6N8_AGE-BSA Db pooled.wiff	2	0	1	1	0	0	0	Q9CQG2			PEAKS DB
SALQNFASTF	36.46	1084.52	10	3.2	543.267	71.23	678.32		1729.1	701.53		825.94	4	F4:11088	20150812RA rerun MIN6N8_BSA Db pooled.wiff	4	1	0	1	1	0	1	Q3UGY8			PEAKS DB
SSPETLISDL	36.85	1060.53	10	-2.7	531.269	71.9	575.22	1889	1611.4	869.2	1065	1268.1	2	F2:11912	20150812RA rerun MIN6N8_AGE-BSA Db pooled.wiff	6	1	1	1	1	1	1	P57774			PEAKS DB
ATPGRLIDFL	43.79	1101.62	10	1.3	551.815	72.81	290.2	470.1	197.98	0	198.88	0	3	F3:12413	20150812RA rerun MIN6N8_BSA ALT Db pooled.wiff	4	1	1	1	0	1	0	Q61656:Q501J6			PEAKS DB
SSLVNKEDVL	20.72	1102.59	10	-0.9	552.298	46.41	47.527	50.759	0				1	F1:7513	20150812RA rerun MIN6N8_AGE-BSA ALT Db pooled.wiff	2	1	1	0	0	0	0	Q6GQT9			PEAKS DB
LSLENGTHTL	52.57	1083.56	10	3.7	542.786	47.35	0	821.7	0	416.66	0	741.77	5	F5:9786	20150812RA rerun MIN6N8_Recon ALT Db pooled.wiff	3	0	1	0	1	0	1	P13864			PEAKS DB
SPLNPVRVHI	39.26	1130.66	10	-3.1	566.332	58.43		333.41					2	F2:9680	20150812RA rerun MIN6N8_AGE-BSA Db pooled.wiff	1	0	1	0	0	0	0	O35737:Q9Z2X1			PEAKS DB
AVIENLKYFL	53.55	1208.68	10	1	605.347	76.56	86.226	275.09	0	100.38	138.53		2	F2:12267	20150812RA rerun MIN6N8_AGE-BSA Db pooled.wiff	4	1	1	0	1	1	0	Q9JMG2			PEAKS DB
GALENAKAEI	21.74	1014.53	10	6.4	508.276	42.7	63.783	55.775					1	F1:7187	20150812RA rerun MIN6N8_AGE-BSA ALT Db pooled.wiff	2	1	1	0	0	0	0	Q9DBS8			PEAKS DB
PENEGRLVHI	22.22	1162.61	10	-4.3	582.307	43.94	28.114						1	F1:7271	20150812RA rerun MIN6N8_AGE-BSA ALT Db pooled.wiff	1	1	0	0	0	0	0	Q9DBS1			PEAKS DB
FAVVNHQGTL	26.68	1084.57	10	4.5	543.291	44.88	25.442	48.9					1	F1:7336	20150812RA rerun MIN6N8_AGE-BSA ALT Db pooled.wiff	2	1	1	0	0	0	0	Q8CEG8:Q5DU02			PEAKS DB
AAILNNAHYL	37.97	1098.58	10	1.7	550.297	53.2	125.01	410.93		211.24	169.87		1	F1:8323	20150812RA rerun MIN6N8_AGE-BSA ALT Db pooled.wiff	4	1	1	0	1	1	0	Q3UHK6:Q9WTS4			PEAKS DB
FAPVNVTTEV	31.97	1075.55	10	0.7	538.784	57.96	649.41			1003.3			4	F4:9627	20150812RA rerun MIN6N8_BSA Db pooled.wiff	2	1	0	0	1	0	0	P10126			PEAKS DB
DQAVSLLLYI	19.96	1133.63	10	11.1	567.829	62.06				144			4	F4:10186	20150812RA rerun MIN6N8_BSA Db pooled.wiff	1	0	0	0	1	0	0	A2ARM1			PEAKS DB
VSLLNPPETL	39.33	1081.6	10	-2.4	541.805	68.04	340.48	2731.3		1020.5	0	741.35	4	F4:10810	20150812RA rerun MIN6N8_BSA Db pooled.wiff	4	1	1	0	1	0	1	P51943			PEAKS DB
ARSLNYLLYV	15.44	1210.67	10	3.2	606.343	76.8				245			4	F4:11467	20150812RA rerun MIN6N8_BSA Db pooled.wiff	1	0	0	0	1	0	0	Q62190			PEAKS DB
LIMLCTQQAP	16.39	1116.57	10	26.7	559.303	62.57	0						1	F1:9461	20150812RA rerun MIN6N8_AGE-BSA ALT Db pooled.wiff	0	0	0	0	0	0	0				PEAKS DB
SAPLPPSIFM(+15.99)	27.81	1074.54	10	-0.5	538.276	65.14	0			334.2			1	F1:9663	20150812RA rerun MIN6N8_AGE-BSA ALT Db pooled.wiff	1	0	0	0	1	0	0	Q920E5	Oxidation (M)	M10:Oxidation (M):1000.00	PEAKS DB
YIADKKDVYE	15.33	1242.61	10	-1.3	622.312	30.94		1.2616					2	F2:5893	20150812RA rerun MIN6N8_AGE-BSA Db pooled.wiff	1	0	1	0	0	0	0	Q9CR21			PEAKS DB
LEVEEEEQRI	18.1	1272.62	10	3.3	637.318	42.92		952.18					2	F2:7288	20150812RA rerun MIN6N8_AGE-BSA Db pooled.wiff	1	0	1	0	0	0	0	Q6P5H2			PEAKS DB
QYGNILKHVM(+15.99)	31.32	1217.62	10	-1.5	609.816	44.76		130.34		41.567		115.81	4	F4:7734	20150812RA rerun MIN6N8_BSA Db pooled.wiff	3	0	1	0	1	0	1	Q8R4R6	Oxidation (M)	M10:Oxidation (M):1000.00	PEAKS DB
EEIPEGASTL	19.87	1044.5	10	9.2	523.26	45.65		458.25					2	F2:7502	20150812RA rerun MIN6N8_AGE-BSA Db pooled.wiff	1	0	1	0	0	0	0	D3YXG0			PEAKS DB
SIYPAPQVST	38.92	1061.54	10	1.6	531.777	47.35		523.73					2	F2:7733	20150812RA rerun MIN6N8_AGE-BSA Db pooled.wiff	1	0	1	0	0	0	0	P68368:P68373:P68369:P05213			PEAKS DB
MTSSSKEDWP	15.93	1166.49	10	45.9	584.278	50.93		649.94					2	F2:8236	20150812RA rerun MIN6N8_AGE-BSA Db pooled.wiff	1	0	1	0	0	0	0	Q9DBR4			PEAKS DB
LTGLGGEDLP	15.99	970.497	10	-33.2	486.239	52		1438.1					2	F2:8390	20150812RA rerun MIN6N8_AGE-BSA Db pooled.wiff	1	0	1	0	0	0	0	Q8VCM8			PEAKS DB
LEADLSQPAS	16.37	1029.5	10	35.1	515.773	52.06		98.684					2	F2:8441	20150812RA rerun MIN6N8_AGE-BSA Db pooled.wiff	1	0	1	0	0	0	0	P59240			PEAKS DB
FGIHNGVETL	19.16	1085.55	10	4.8	543.784	52.4		247.43			148.8		5	F5:10322	20150812RA rerun MIN6N8_Recon ALT Db pooled.wiff	2	0	1	0	0	1	0	Q8C0L9			PEAKS DB
MTGLPSTSGT	18.13	950.438	10	42.8	476.245	53.6		522.58					2	F2:8723	20150812RA rerun MIN6N8_AGE-BSA Db pooled.wiff	1	0	1	0	0	0	0	Q9QZ67			PEAKS DB
Q(-17.03)YGNILKHVM	30.94	1184.6	10	-2.2	593.305	54.68		74.758					2	F2:8886	20150812RA rerun MIN6N8_AGE-BSA Db pooled.wiff	1	0	1	0	0	0	0	Q8R4R6	Pyro-glu from Q	Q1:Pyro-glu from Q:1000.00	PEAKS PTM
SAHQNYAEW(+31.99)L	17.71	1249.54	10	-2.4	625.773	56.03		302.09					2	F2:9115	20150812RA rerun MIN6N8_AGE-BSA Db pooled.wiff	1	0	1	0	0	0	0	Q99PL5	Dihydroxy	W9:Dihydroxy:68.47	PEAKS PTM
TLSELDDEAL	15.71	1104.52	10	12.4	553.272	56.32		1797.2					2	F2:9253	20150812RA rerun MIN6N8_AGE-BSA Db pooled.wiff	1	0	1	0	0	0	0	Q2KHI9			PEAKS DB
RGSMSSGLEF	15.82	1069.49	10	19.5	535.76	57.17		699.44					2	F2:9325	20150812RA rerun MIN6N8_AGE-BSA Db pooled.wiff	1	0	1	0	0	0	0	O70305			PEAKS DB
AAIRNYGIEL	19.88	1118.61	10	-0.3	560.311	58.13						0	6	F6:9538	20150812RA rerun MIN6N8_UT Db pooled.wiff	0	0	0	0	0	0	0	Q9WU20			PEAKS DB
FALANHLIKV	19.72	1124.67	10	-0.3	563.341	58.37		66.353					2	F2:9679	20150812RA rerun MIN6N8_AGE-BSA Db pooled.wiff	1	0	1	0	0	0	0	Q9WVK4			PEAKS DB
YAIENVETNL	19.06	1164.57	10	1	583.289	60.01				561.36			4	F4:9919	20150812RA rerun MIN6N8_BSA Db pooled.wiff	1	0	0	0	1	0	0	Q6P2B1			PEAKS DB
AGLLNNPHFI	41.77	1094.59	10	0.8	548.3	62.73		427.96			134.11		5	F5:11248	20150812RA rerun MIN6N8_Recon ALT Db pooled.wiff	2	0	1	0	0	1	0	Q8BJU0			PEAKS DB
FAPVNITTEV	15.62	1089.57	10	5.4	545.794	63.46		143.83					2	F2:10736	20150812RA rerun MIN6N8_AGE-BSA Db pooled.wiff	1	0	1	0	0	0	0	P62631			PEAKS DB
PPLEAAPSTL	24.53	994.533	10	35.5	498.291	67.06		575.9					2	F2:11342	20150812RA rerun MIN6N8_AGE-BSA Db pooled.wiff	1	0	1	0	0	0	0	Q8R0A7			PEAKS DB
VDILMDVGVL	16.86	1072.58	10	-1.5	537.297	74.82		185.73					2	F2:12127	20150812RA rerun MIN6N8_AGE-BSA Db pooled.wiff	1	0	1	0	0	0	0	O88410			PEAKS DB
ISPTHPGEGL	28.7	1006.51	10	0.9	504.261	38.72		0					2	F2:7024	20150812RA rerun MIN6N8_AGE-BSA Db pooled.wiff	0	0	0	0	0	0	0	Q9JK38			PEAKS DB
DVPAPGPVDL	21.76	978.502	10	6.2	490.26	52.69				515.03			4	F4:8828	20150812RA rerun MIN6N8_BSA Db pooled.wiff	1	0	0	0	1	0	0	Q80U35			PEAKS DB
ARAASRLAFL	21.69	1074.63	10	-20.6	538.31	56.59				596.34			4	F4:9414	20150812RA rerun MIN6N8_BSA Db pooled.wiff	1	0	0	0	1	0	0	B2RQL2			PEAKS DB
VTSSSQALYI	15.5	1067.55	10	44.4	534.804	57.85				325.05			4	F4:9602	20150812RA rerun MIN6N8_BSA Db pooled.wiff	1	0	0	0	1	0	0	D3YXG0			PEAKS DB
NAPGASGKPF	16.55	944.472	10	31.1	473.256	60.18				835.04			4	F4:9990	20150812RA rerun MIN6N8_BSA Db pooled.wiff	1	0	0	0	1	0	0	P70419			PEAKS DB
LADGGDLSTL	15.02	960.476	10	39.2	481.263	61.83				3799.1			4	F4:10131	20150812RA rerun MIN6N8_BSA Db pooled.wiff	1	0	0	0	1	0	0	A7L9Z8			PEAKS DB
YGPENTLPTL	27.36	1103.55	10	-0.1	552.781	63.34					269.39		5	F5:11277	20150812RA rerun MIN6N8_Recon ALT Db pooled.wiff	1	0	0	0	0	1	0	Q5RJY2			PEAKS DB
SQYRFTVSDL	16.49	1214.59	10	-4.6	608.299	60.22				0			4	F4:9961	20150812RA rerun MIN6N8_BSA Db pooled.wiff	0	0	0	0	0	0	0	P51945			PEAKS DB
SAPFPAPDTI	31.13	1014.5	10	0.8	508.257	60.43				0			4	F4:9985	20150812RA rerun MIN6N8_BSA Db pooled.wiff	0	0	0	0	0	0	0	Q8BGS1			PEAKS DB
GNLWATGHFM	34.98	1132.51	10	5.7	567.265	64.83				0	0		4	F4:10472	20150812RA rerun MIN6N8_BSA Db pooled.wiff	0	0	0	0	0	0	0	Q9CR53			PEAKS DB
SAPPPLISTL	23.47	994.57	10	-3.5	498.291	67.15						306.03	6	F6:10141	20150812RA rerun MIN6N8_UT Db pooled.wiff	1	0	0	0	0	0	1	A0A087WPF7			PEAKS DB
ASPLAASAIL	20.32	912.528	10	-20.4	457.262	63.99						0	6	F6:9934	20150812RA rerun MIN6N8_UT Db pooled.wiff	0	0	0	0	0	0	0	Q9JKN6			PEAKS DB
MAPLTPQLLL	16.69	1095.64	10	-18.2	548.815	72.1						0	6	F6:10479	20150812RA rerun MIN6N8_UT Db pooled.wiff	0	0	0	0	0	0	0	Q8BUI3			PEAKS DB
PTNPRFGGKEL	37.06	1214.64	11	3.4	608.327	40.69	74.586	69.543	39.098			43.34	1	F1:7065	20150812RA rerun MIN6N8_AGE-BSA ALT Db pooled.wiff	4	1	1	1	0	0	1	P97311			PEAKS DB
SALQNAESDRL	50.25	1202.59	11	0.8	602.3	42.36	0	511.93	139.36	0	17.683	307.58	3	F3:8586	20150812RA rerun MIN6N8_BSA ALT Db pooled.wiff	4	0	1	1	0	1	1	Q6RT24			PEAKS DB
ASYRAQPSVSL	33.41	1177.61	11	-0.5	589.812	44.12	201.25	249.63	79.329	91.191	0	63.391	6	F6:8252	20150812RA rerun MIN6N8_UT Db pooled.wiff	5	1	1	1	1	0	1	Q8C2Q3			PEAKS DB
IQKTPQIQVYS	44.72	1303.71	11	1.7	652.862	43.89	166.54	107.89	125.42			57.229	1	F1:7265	20150812RA rerun MIN6N8_AGE-BSA ALT Db pooled.wiff	4	1	1	1	0	0	1	P01887			PEAKS DB
SSLSNPIANTM(+15.99)	62.84	1149.53	11	0.2	575.774	44.07	737.96	839.15	365.1	541.4	12.916	456.79	6	F6:8245	20150812RA rerun MIN6N8_UT Db pooled.wiff	6	1	1	1	1	1	1	Q8VE08	Oxidation (M)	M11:Oxidation (M):1000.00	PEAKS DB
AQYGNILKHVM(+15.99)	55.35	1288.66	11	-0.7	645.335	44.92	117.34	492.76	384.49	191.95		474.29	2	F2:7428	20150812RA rerun MIN6N8_AGE-BSA Db pooled.wiff	5	1	1	1	1	0	1	Q8R4R6	Oxidation (M)	M11:Oxidation (M):1000.00	PEAKS DB
SSVRNSIENSL	32.04	1204.6	11	-0.3	603.308	45.53	436.81	555.2	581.19	308.6	614.82		5	F5:9618	20150812RA rerun MIN6N8_Recon ALT Db pooled.wiff	5	1	1	1	1	1	0	O54990			PEAKS DB
SAIM(+15.99)NPASKVI	60.96	1145.61	11	2	573.813	46.28	10049	13212	12229	7468.6	6978.9	8830.9	2	F2:7689	20150812RA rerun MIN6N8_AGE-BSA Db pooled.wiff	7	1	1	2	1	1	1	Q68FD5	Oxidation (M)	M4:Oxidation (M):1000.00	PEAKS DB
SSIQNFQKGTL	41.09	1221.64	11	5.4	611.827	46.56	50.069	137.03	62.945		58.693	0	2	F2:7675	20150812RA rerun MIN6N8_AGE-BSA Db pooled.wiff	4	1	1	1	0	1	0	Q8BX57			PEAKS DB
SAIM(+31.99)NPASKVI	19.91	1161.61	11	-0.3	581.808	47.87			177.11			72.428	3	F3:9028	20150812RA rerun MIN6N8_BSA ALT Db pooled.wiff	2	0	0	1	0	0	1	Q68FD5	Sulphone	M4:Sulphone:1000.00	PEAKS PTM
LSAERPLNEQI	47.03	1268.67	11	-3.4	635.341	48.06	156.99	104.73	92.108			59.37	6	F6:8648	20150812RA rerun MIN6N8_UT Db pooled.wiff	4	1	1	1	0	0	1	P47867			PEAKS DB
SLGKNPTDAYL	36.08	1177.6	11	1.9	589.805	48.06	3817		3258.6	2388.8	2294.5	2365.5	1	F1:7638	20150812RA rerun MIN6N8_AGE-BSA ALT Db pooled.wiff	5	1	0	1	1	1	1	Q3THE2			PEAKS DB
EVEDPQVAQLE	26.01	1255.59	11	0.4	628.804	48.69						89.766	6	F6:8690	20150812RA rerun MIN6N8_UT Db pooled.wiff	1	0	0	0	0	0	1	P01326			PEAKS DB
SSILNKYDDNV	35.22	1266.61	11	1.7	634.311	48.61			255.99		177.98	109.04	3	F3:9081	20150812RA rerun MIN6N8_BSA ALT Db pooled.wiff	3	0	0	1	0	1	1	O08915			PEAKS DB
YGYSNRVVDLM(+15.99)	23.54	1331.62	11	4.8	666.817	48.72			270.42				3	F3:9097	20150812RA rerun MIN6N8_BSA ALT Db pooled.wiff	1	0	0	1	0	0	0	P16858	Oxidation (M)	M11:Oxidation (M):1000.00	PEAKS DB
ASM(+15.99)SNDFKSVL	47.82	1213.56	11	1	607.788	48.88		539.73	776.11	205.15		578.19	3	F3:9103	20150812RA rerun MIN6N8_BSA ALT Db pooled.wiff	4	0	1	1	1	0	1	Q8K1E0	Oxidation (M)	M3:Oxidation (M):1000.00	PEAKS DB
RSLGNDVKSYL	38.29	1250.66	11	-0.4	626.336	49.06	1223.5	2684.7	2244.7	1861.1		1110.7	3	F3:9155	20150812RA rerun MIN6N8_BSA ALT Db pooled.wiff	5	1	1	1	1	0	1	Q9CYI0			PEAKS DB
VSPTNPTKLQI	51.85	1196.68	11	-0.5	599.343	49.7	447.35	795.92	267.04	207.46	542.38		1	F1:7922	20150812RA rerun MIN6N8_AGE-BSA ALT Db pooled.wiff	5	1	1	1	1	1	0	Q3UHC7			PEAKS DB
IGAVNLPAAAL	19.88	1008.6	11	13.3	505.311	50.88			554.17				3	F3:9329	20150812RA rerun MIN6N8_BSA ALT Db pooled.wiff	1	0	0	1	0	0	0	Q9EPT5			PEAKS DB
SAIMNPASKVI	64.45	1129.62	11	1.2	565.814	51.63	2793.9	3049	2900.9	793.45	2567	0	1	F1:8115	20150812RA rerun MIN6N8_AGE-BSA ALT Db pooled.wiff	5	1	1	1	1	1	0	Q68FD5			PEAKS DB
AAPQNFTPSM(+15.99)I	37.92	1191.56	11	1.9	596.786	52.94	3921.9	9697.8	10202	5927.9	5204.5	0	3	F3:9647	20150812RA rerun MIN6N8_BSA ALT Db pooled.wiff	5	1	1	1	1	1	0	Q9Z1T1	Oxidation (M)	M10:Oxidation (M):1000.00	PEAKS DB
RAIYNNMKQFI	25.05	1396.73	11	0.9	699.369	54.11	142.53	1214.5	347.47	188.3			1	F1:8435	20150812RA rerun MIN6N8_AGE-BSA ALT Db pooled.wiff	4	1	1	1	1	0	0	O55143			PEAKS DB
GQIGSLENHYL	38.6	1229.6	11	2	615.808	55.01	264.88	1383.3	378.7		236.14		1	F1:8516	20150812RA rerun MIN6N8_AGE-BSA ALT Db pooled.wiff	4	1	1	1	0	1	0	P63239			PEAKS DB
SSLSNPIANTM	22.57	1133.54	11	-0.3	567.774	55.18	261.62	150.46					1	F1:8527	20150812RA rerun MIN6N8_AGE-BSA ALT Db pooled.wiff	2	1	1	0	0	0	0	Q8VE08			PEAKS DB
VAPANSLVHAF	52.88	1124.6	11	3.2	563.306	56.41	133.78	350.11	430.89	175.13	137.01		3	F3:10146	20150812RA rerun MIN6N8_BSA ALT Db pooled.wiff	5	1	1	1	1	1	0	Q6PNC0			PEAKS DB
ASMSNDFKSVL	59.55	1197.57	11	-5.3	599.789	57.1	171.3	1492.1	1078.7	563.64	678.67	0	6	F6:9437	20150812RA rerun MIN6N8_UT Db pooled.wiff	5	1	1	1	1	1	0	Q8K1E0			PEAKS DB
SAVSNNYIQTL	41.48	1208.6	11	1.9	605.309	57.56		1746.8		1574.9	968.32	0	4	F4:9568	20150812RA rerun MIN6N8_BSA Db pooled.wiff	3	0	1	0	1	1	0	P30999			PEAKS DB
AAVQNPALTAL	37.28	1067.6	11	1.8	534.806	57.92	137.16		649.92	325.05	197.33		5	F5:10891	20150812RA rerun MIN6N8_Recon ALT Db pooled.wiff	4	1	0	1	1	1	0	Q3U1N2			PEAKS DB
FSPLNPVRVHI	29.47	1277.72	11	-0.7	426.914	58.43		657.02					2	F2:9675	20150812RA rerun MIN6N8_AGE-BSA Db pooled.wiff	1	0	1	0	0	0	0	O35737:Q9Z2X1			PEAKS DB
KSPTAPPDLYF	31.02	1234.62	11	3.3	618.319	59.67	4155.9	11876	11408	6456.2	6176.6	0	3	F3:10702	20150812RA rerun MIN6N8_BSA ALT Db pooled.wiff	5	1	1	1	1	1	0	Q9QXM0			PEAKS DB
SSPINISGQVI	16.89	1113.6	11	2.2	557.809	61.23		282.66	166.9				2	F2:10278	20150812RA rerun MIN6N8_AGE-BSA Db pooled.wiff	2	0	1	1	0	0	0	Q80WE4			PEAKS DB
AAPQNFTPSMI	43.9	1175.56	11	-0.4	588.788	61.72	208	1613.3	1000.4	413.98	745.02	267.7	4	F4:10167	20150812RA rerun MIN6N8_BSA Db pooled.wiff	6	1	1	1	1	1	1	Q9Z1T1			PEAKS DB
AALVSKAIDVL	53.94	1098.66	11	4	550.34	62.5	21.601	113.07	82.894	0	0		4	F4:10248	20150812RA rerun MIN6N8_BSA Db pooled.wiff	3	1	1	1	0	0	0	E1U8D0			PEAKS DB
YTLLNKAPEYL	58.66	1323.71	11	3.6	662.861	62.99	69.549	1268	225.98		155.87		3	F3:11357	20150812RA rerun MIN6N8_BSA ALT Db pooled.wiff	4	1	1	1	0	1	0	P97379			PEAKS DB
AAITNKYQLVF	29.75	1266.7	11	-6.9	634.349	63.4			29.87				3	F3:11421	20150812RA rerun MIN6N8_BSA ALT Db pooled.wiff	1	0	0	1	0	0	0	B2RS91			PEAKS DB
MAPENKVADWL	18.47	1272.62	11	-1.5	637.313	63.4			109.76				3	F3:11426	20150812RA rerun MIN6N8_BSA ALT Db pooled.wiff	1	0	0	1	0	0	0	Q6A065			PEAKS DB
SQPVPPADIYL	48.51	1198.62	11	3.7	600.319	64.91		456.02	235.72	80.354	0		4	F4:10473	20150812RA rerun MIN6N8_BSA Db pooled.wiff	3	0	1	1	1	0	0	Q9D074			PEAKS DB
QGITNLKLVTL	33.74	1198.73	11	-2.4	600.369	67.43		83.353	41.985	50.787	49.301		5	F5:11643	20150812RA rerun MIN6N8_Recon ALT Db pooled.wiff	4	0	1	1	1	1	0	Q8C3Y4			PEAKS DB
GALKNLSVIYI	16.79	1189.71	11	4.3	595.862	69.14	187.45			365.75			4	F4:10944	20150812RA rerun MIN6N8_BSA Db pooled.wiff	2	1	0	0	1	0	0	F2Z461			PEAKS DB
TGILNPEGYTL	28.3	1176.6	11	3	589.309	69.57		316.49	238.45	162.8			2	F2:11696	20150812RA rerun MIN6N8_AGE-BSA Db pooled.wiff	3	0	1	1	1	0	0	O88554			PEAKS DB
YDLPLKTLESI	15.06	1290.71	11	-7.2	646.354	70.07				175.02			4	F4:11001	20150812RA rerun MIN6N8_BSA Db pooled.wiff	1	0	0	0	1	0	0	Q9Z2U2			PEAKS DB
SM(+15.99)LQNPLGNVL	41.47	1200.62	11	-1.9	601.315	70.81	0	3037	2241.1	1696.1	1987.4	1613.8	6	F6:10374	20150812RA rerun MIN6N8_UT Db pooled.wiff	5	0	1	1	1	1	1	P70166	Oxidation (M)	M2:Oxidation (M):1000.00	PEAKS DB
YQFDKVGILTL	49.34	1295.71	11	1	648.861	75.26	0	1287.1	105.59	303.9	609.58	48.684	1	F1:10393	20150812RA rerun MIN6N8_AGE-BSA ALT Db pooled.wiff	5	0	1	1	1	1	1	Q8BKT7			PEAKS DB
SSPETLISDLL	43.74	1173.61	11	2	587.813	83.54	606.18		686.79		658.26	182.12	5	F5:13039	20150812RA rerun MIN6N8_Recon ALT Db pooled.wiff	4	1	0	1	0	1	1	P57774			PEAKS DB
FVKQHLC(+31.99)GSHL	41.19	1299.64	11	-14.8	434.212	40.58	153.93	254.43			0	47.897	1	F1:7064	20150812RA rerun MIN6N8_AGE-BSA ALT Db pooled.wiff	3	1	1	0	0	0	1	P01326	Dihydroxy	C7:Dihydroxy:67.69	PEAKS PTM
SGQLGLPDEEN	26.58	1157.52	11	0.2	579.767	46.4						323.61	6	F6:8472	20150812RA rerun MIN6N8_UT Db pooled.wiff	1	0	0	0	0	0	1	Q03517			PEAKS DB
EVEDPQVEQLE	17.97	1313.6	11	-0.5	657.806	48.12						90.616	6	F6:8644	20150812RA rerun MIN6N8_UT Db pooled.wiff	1	0	0	0	0	0	1	P01325			PEAKS DB
TGPALCTVVFL	17	1119.6	11	-24.2	560.791	57.51	7681.1						1	F1:8940	20150812RA rerun MIN6N8_AGE-BSA ALT Db pooled.wiff	1	1	0	0	0	0	0	Q61091			PEAKS DB
STVQNAEAYVL	15.34	1193.59	11	3.5	597.804	59.12		1523.1			239.58		5	F5:10965	20150812RA rerun MIN6N8_Recon ALT Db pooled.wiff	2	0	1	0	0	1	0	Q8R5K2			PEAKS DB
AGIENKFGLYL	45.81	1223.65	11	-0.8	612.833	70.31	46.05	183.99		97.725	122.32		4	F4:11009	20150812RA rerun MIN6N8_BSA Db pooled.wiff	4	1	1	0	1	1	0	Q8BH59:Q9QXX4			PEAKS DB
SQVVNVLTSVI	23.33	1157.67	11	3.5	579.841	79.07		152.07					2	F2:12482	20150812RA rerun MIN6N8_AGE-BSA Db pooled.wiff	1	0	1	0	0	0	0	Q3TQQ9			PEAKS DB
ASFDKVAIPEV	25.99	1174.62	11	1.2	588.318	61.28		483.63					2	F2:10269	20150812RA rerun MIN6N8_AGE-BSA Db pooled.wiff	1	0	1	0	0	0	0	P83741			PEAKS DB
QSLVNLRELYL	41.81	1346.76	11	2.2	674.385	74.48	0	75.503			19.426		2	F2:12117	20150812RA rerun MIN6N8_AGE-BSA Db pooled.wiff	2	0	1	0	0	1	0	Q3UM45			PEAKS DB
VPPENVLGALL	18.91	1120.65	11	-2	561.329	83				89.588			4	F4:12171	20150812RA rerun MIN6N8_BSA Db pooled.wiff	1	0	0	0	1	0	0	Q9QXV0			PEAKS DB
RAIYNNM(+15.99)KQFI	27.43	1412.72	11	7.2	707.374	42.79		38.271				16.525	6	F6:8152	20150812RA rerun MIN6N8_UT Db pooled.wiff	2	0	1	0	0	0	1	O55143	Oxidation (M)	M7:Oxidation (M):1000.00	PEAKS DB
ANVSHPVIIQF	20.92	1223.67	11	-31	612.82	47.35		69.208					2	F2:7758	20150812RA rerun MIN6N8_AGE-BSA Db pooled.wiff	1	0	1	0	0	0	0	Q8R4G9			PEAKS DB
ASHVNITSNVL	29.92	1153.61	11	-2.1	577.809	48.09		53.742					2	F2:7847	20150812RA rerun MIN6N8_AGE-BSA Db pooled.wiff	1	0	1	0	0	0	0	O55112			PEAKS DB
SAILSDPESHI	36.7	1167.58	11	2.2	584.796	50.42		302.54					2	F2:8195	20150812RA rerun MIN6N8_AGE-BSA Db pooled.wiff	1	0	1	0	0	0	0	Q8VI84			PEAKS DB
VTSGLSSGMTS	16.23	1025.47	11	-31.6	513.725	52		714.24					2	F2:8416	20150812RA rerun MIN6N8_AGE-BSA Db pooled.wiff	1	0	1	0	0	0	0	Q91ZU6			PEAKS DB
TAVVNRVFDKL	27.53	1260.72	11	-8	631.36	54.12		130.97					2	F2:8810	20150812RA rerun MIN6N8_AGE-BSA Db pooled.wiff	1	0	1	0	0	0	0	P28076			PEAKS DB
TGAAGDSLARP	18.53	1014.51	11	-27.5	508.247	55.41		4522.2					2	F2:8971	20150812RA rerun MIN6N8_AGE-BSA Db pooled.wiff	1	0	1	0	0	0	0	Q68FM6			PEAKS DB
NGIRNIDLHYI	18.53	1326.7	11	-5.1	664.355	56.94		36.764					2	F2:9311	20150812RA rerun MIN6N8_AGE-BSA Db pooled.wiff	1	0	1	0	0	0	0	Q6ZQ89			PEAKS DB
SKFDVSGYPTI	17.83	1212.6	11	3.5	607.309	57.28		903.37		245.62			4	F4:9540	20150812RA rerun MIN6N8_BSA Db pooled.wiff	2	0	1	0	1	0	0	P08003			PEAKS DB
YGYSNRVVDLM	29.36	1315.62	11	-2.2	658.816	59.46		198.57			0		2	F2:9912	20150812RA rerun MIN6N8_AGE-BSA Db pooled.wiff	1	0	1	0	0	0	0	P16858			PEAKS DB
GHADGTIVRYF	15.32	1234.61	11	12	618.318	59.57		11876					2	F2:10104	20150812RA rerun MIN6N8_AGE-BSA Db pooled.wiff	1	0	1	0	0	0	0	Q6VH22			PEAKS DB
APSAPAAASAT	15.33	913.45	11	42.9	457.751	59.91		114.47					2	F2:10010	20150812RA rerun MIN6N8_AGE-BSA Db pooled.wiff	1	0	1	0	0	0	0	Q9JKV1			PEAKS DB
RVFQNEVLGTL	16.56	1274.7	11	0.3	638.355	61.34		150.68					2	F2:10310	20150812RA rerun MIN6N8_AGE-BSA Db pooled.wiff	1	0	1	0	0	0	0	Q8CHW4			PEAKS DB
TGTPQSPAVAA	17.48	998.503	11	39	500.277	61.51		1269.5					2	F2:10324	20150812RA rerun MIN6N8_AGE-BSA Db pooled.wiff	1	0	1	0	0	0	0	P54728			PEAKS DB
AEVNADRITWI	17.91	1286.66	11	10.8	644.344	65.06		11.534					2	F2:10994	20150812RA rerun MIN6N8_AGE-BSA Db pooled.wiff	1	0	1	0	0	0	0	Q08189			PEAKS DB
ASLLAAQGSIA	15.58	1000.56	11	-18.9	501.274	65.29		2192					2	F2:10987	20150812RA rerun MIN6N8_AGE-BSA Db pooled.wiff	1	0	1	0	0	0	0	Q3UPL0			PEAKS DB
SNYFDPSKIQL	23.33	1310.65	11	1.4	656.332	67.8		176.06					2	F2:11446	20150812RA rerun MIN6N8_AGE-BSA Db pooled.wiff	1	0	1	0	0	0	0	O09111			PEAKS DB
SSLLNSHLQWL	25.98	1296.68	11	-5.6	649.343	73.96		30.98					2	F2:12097	20150812RA rerun MIN6N8_AGE-BSA Db pooled.wiff	1	0	1	0	0	0	0	P48381			PEAKS DB
SMLQNPLGNVL	20.38	1184.62	11	2.7	593.319	77.3		266.06					2	F2:12344	20150812RA rerun MIN6N8_AGE-BSA Db pooled.wiff	1	0	1	0	0	0	0	P70166			PEAKS DB
IYPPINVLPSL	23.23	1224.71	11	2.6	613.363	82.88		215.93					2	F2:12725	20150812RA rerun MIN6N8_AGE-BSA Db pooled.wiff	1	0	1	0	0	0	0	P62814			PEAKS DB
VAPENLPALLL	24.11	1148.68	11	-0.7	575.346	82.94		187.26		63.716			4	F4:12161	20150812RA rerun MIN6N8_BSA Db pooled.wiff	2	0	1	0	1	0	0	Q91V24			PEAKS DB
AGQQPARNEEL	20.61	1211.59	11	-27.9	606.783	45.16				77.914			4	F4:7764	20150812RA rerun MIN6N8_BSA Db pooled.wiff	1	0	0	0	1	0	0	Q6PE13			PEAKS DB
LAGALASNPVD	17.07	1026.53	11	18.7	514.283	46.24				411.76			4	F4:7858	20150812RA rerun MIN6N8_BSA Db pooled.wiff	1	0	0	0	1	0	0	Q9Z2B2			PEAKS DB
TVSGVNGPLVI	17.73	1054.6	11	11.6	528.313	48.79				28.15			4	F4:8225	20150812RA rerun MIN6N8_BSA Db pooled.wiff	1	0	0	0	1	0	0	P62814			PEAKS DB
TGPAGDKGDSG	20.81	960.415	11	-39.5	481.194	59.51				0			4	F4:9858	20150812RA rerun MIN6N8_BSA Db pooled.wiff	0	0	0	0	0	0	0	P08121			PEAKS DB
TPSHELMQAGG	18.84	1126.51	11	17.3	564.269	52.99					0		5	F5:10382	20150812RA rerun MIN6N8_Recon ALT Db pooled.wiff	0	0	0	0	0	0	0	Q60591			PEAKS DB
AGPTNSLKYVP	18.07	1145.61	11	0.3	573.812	47.67						559.96	6	F6:8600	20150812RA rerun MIN6N8_UT Db pooled.wiff	1	0	0	0	0	0	1	Q8BMI0			PEAKS DB
AGIAEKDQAYL	15.08	1177.6	11	-0.5	589.806	48.18						2365.5	6	F6:8674	20150812RA rerun MIN6N8_UT Db pooled.wiff	1	0	0	0	0	0	1				PEAKS DB
DTSSKGYQVPAY	28.31	1314.61	12	4.6	658.313	44.58		363.69					2	F2:7400	20150812RA rerun MIN6N8_AGE-BSA Db pooled.wiff	1	0	1	0	0	0	0	Q8R191			PEAKS DB
ASTNIVSVCQAA	16.28	1162.57	12	-17.9	582.278	55.28			2718.6				3	F3:9927	20150812RA rerun MIN6N8_BSA ALT Db pooled.wiff	1	0	0	1	0	0	0	Q5SUR0			PEAKS DB
NASRGGLAAPSS	15.22	1086.54	12	-28	544.261	58.86			0				3	F3:10627	20150812RA rerun MIN6N8_BSA ALT Db pooled.wiff	0	0	0	0	0	0	0	Q52KG5			PEAKS DB
AAAVGDSADPPH	16.08	1106.5	12	27.2	554.27	60.06			0				3	F3:10822	20150812RA rerun MIN6N8_BSA ALT Db pooled.wiff	0	0	0	0	0	0	0	P55014			PEAKS DB
MDLDFEADTSEG	15.33	1328.51	12	-1.3	665.257	44.88	28.226						1	F1:7338	20150812RA rerun MIN6N8_AGE-BSA ALT Db pooled.wiff	1	1	0	0	0	0	0	Q6NZE7			PEAKS DB
Q(-17.03)ELGKLTGPSNQ	47.2	1253.63	12	4.1	627.82	47.78	66.593						1	F1:7633	20150812RA rerun MIN6N8_AGE-BSA ALT Db pooled.wiff	1	1	0	0	0	0	0	Q03517	Pyro-glu from Q	Q1:Pyro-glu from Q:1000.00	PEAKS PTM
FDPSKIQLPEDD	38.78	1402.66	12	-6.6	702.33	58.2	122.48						1	F1:8961	20150812RA rerun MIN6N8_AGE-BSA ALT Db pooled.wiff	1	1	0	0	0	0	0	O09111			PEAKS DB
HALTPAQVLGM(+15.99)A	16.23	1223.63	12	-4	612.82	47.35		69.208					2	F2:7752	20150812RA rerun MIN6N8_AGE-BSA Db pooled.wiff	1	0	1	0	0	0	0	Q99J85	Oxidation (M)	M11:Oxidation (M):1000.00	PEAKS DB
YAVGNHDFIEAY	38.83	1397.63	12	2.7	699.82	57.29		21.235					2	F2:9411	20150812RA rerun MIN6N8_AGE-BSA Db pooled.wiff	1	0	1	0	0	0	0	Q8BFV2			PEAKS DB
SQFPQGYQFPSM(+15.99)	29.74	1431.61	12	4.1	716.815	58.49		689.52					2	F2:9873	20150812RA rerun MIN6N8_AGE-BSA Db pooled.wiff	1	0	1	0	0	0	0	Q8BTG7	Oxidation (M)	M12:Oxidation (M):1000.00	PEAKS DB
NPQGPPYPMGGT	16.71	1214.54	12	4.1	608.278	64.2		322.76					2	F2:10830	20150812RA rerun MIN6N8_AGE-BSA Db pooled.wiff	1	0	1	0	0	0	0	A2BH40			PEAKS DB
SLPSTVSANSLY	19.1	1237.62	12	-0.8	619.815	68.66		1221					2	F2:11577	20150812RA rerun MIN6N8_AGE-BSA Db pooled.wiff	1	0	1	0	0	0	0	Q6ZQK5			PEAKS DB
SMFSPAN(+.98)IGQPR	17.52	1304.62	12	-11.6	653.307	59.09				130.86			4	F4:9786	20150812RA rerun MIN6N8_BSA Db pooled.wiff	1	0	0	0	1	0	0	Q8R4R6	Deamidation (NQ)	N7:Deamidation (NQ):9.42	PEAKS PTM
GASVAAAAAAAV	15.15	928.498	12	33.7	465.271	65.42				93.003			4	F4:10509	20150812RA rerun MIN6N8_BSA Db pooled.wiff	1	0	0	0	1	0	0	Q6PDQ2			PEAKS DB
PGGAAGGGYAHV	17.01	1012.47	12	17.9	507.251	60.87					46.805		5	F5:11090	20150812RA rerun MIN6N8_Recon ALT Db pooled.wiff	1	0	0	0	0	1	0	P53783			PEAKS DB
IPVGSLKNEDTPN	62.77	1382.7	13	-1.7	692.358	38.24	0		20.855			185.52	6	F6:7760	20150812RA rerun MIN6N8_UT Db pooled.wiff	2	0	0	1	0	0	1	Q03517			PEAKS DB
ALAPGSQSSEM(+15.99)SL	48.02	1292.59	13	-0.4	647.301	41.73	589.88	510.16	138.98		0	969.58	2	F2:7209	20150812RA rerun MIN6N8_AGE-BSA Db pooled.wiff	4	1	1	1	0	0	1	P01899	Oxidation (M)	M11:Oxidation (M):1000.00	PEAKS DB
TNEIVEEQYTPQS	40.24	1536.69	13	3.9	769.354	45.67	190.73	974.88	129.9	87.914	171.04	442.04	1	F1:7385	20150812RA rerun MIN6N8_AGE-BSA ALT Db pooled.wiff	6	1	1	1	1	1	1	Q03517			PEAKS DB
VLPPTNVGSNTYG	31.66	1317.66	13	-0.6	659.833	45.87	3171.4		1859.8		138.01	3167.3	3	F3:8837	20150812RA rerun MIN6N8_BSA ALT Db pooled.wiff	5	1	0	2	0	1	1	P12968			PEAKS DB
YGGFLRRQFKVVT	21.48	1569.88	13	1.4	524.299	51.45			113.6				3	F3:9412	20150812RA rerun MIN6N8_BSA ALT Db pooled.wiff	1	0	0	1	0	0	0	O35417			PEAKS DB
NSPRNLAM(+15.99)EATYI	22.55	1494.71	13	-0.2	748.362	53.14			160.11	109.04			4	F4:8931	20150812RA rerun MIN6N8_BSA Db pooled.wiff	2	0	0	1	1	0	0	O70194	Oxidation (M)	M8:Oxidation (M):1000.00	PEAKS DB
LTTSPKLITGLTM(+15.99)	19.5	1390.77	13	1.1	696.393	55.91			47.11	14.924			4	F4:9294	20150812RA rerun MIN6N8_BSA Db pooled.wiff	2	0	0	1	1	0	0	P03911	Oxidation (M)	M13:Oxidation (M):1000.00	PEAKS DB
SAIM(+15.99)NPASKVIAL	45.95	1329.73	13	1.5	665.872	58.35	632.23	2753.3	2092.6	961.01			3	F3:10482	20150812RA rerun MIN6N8_BSA ALT Db pooled.wiff	4	1	1	1	1	0	0	Q68FD5	Oxidation (M)	M4:Oxidation (M):1000.00	PEAKS DB
SAIMNPASKVIAL	54.01	1313.74	13	1.9	657.875	63.17	74.681	547.01	369.12	94.221	236.89	0	3	F3:11379	20150812RA rerun MIN6N8_BSA ALT Db pooled.wiff	5	1	1	1	1	1	0	Q68FD5			PEAKS DB
AAPTNRQIEILEL	23.36	1466.81	13	-5.7	734.406	66.35	25.992	213.52	122.43		86.871		5	F5:11514	20150812RA rerun MIN6N8_Recon ALT Db pooled.wiff	4	1	1	1	0	1	0	Q9Z0W3			PEAKS DB
TDACEQLCDPDTG	16.45	1366.5	13	-15.7	684.247	40.43						0	6	F6:8000	20150812RA rerun MIN6N8_UT Db pooled.wiff	0	0	0	0	0	0	0	Q80Z10			PEAKS DB
ALAPGSQSSEMSL	47.11	1276.6	13	2	639.305	52.56	621.69	388.88		129.78	325.79		5	F5:10332	20150812RA rerun MIN6N8_Recon ALT Db pooled.wiff	4	1	1	0	1	1	0	P01899			PEAKS DB
SVMENSKVLGEAM(+15.99)	31.29	1409.65	13	-2	705.831	41.78		20.674					2	F2:7217	20150812RA rerun MIN6N8_AGE-BSA Db pooled.wiff	1	0	1	0	0	0	0	P26039	Oxidation (M)	M13:Oxidation (M):112.07	PEAKS DB
NSPRNLAMEATYI	25.39	1478.72	13	0.6	740.365	58.09		142.97					2	F2:9609	20150812RA rerun MIN6N8_AGE-BSA Db pooled.wiff	1	0	1	0	0	0	0	O70194			PEAKS DB
LQIDNARLAADDF	35.39	1460.73	13	0.8	731.369	60.77		408					2	F2:10185	20150812RA rerun MIN6N8_AGE-BSA Db pooled.wiff	1	0	1	0	0	0	0	Q6IFX2:Q9Z2K1:P02535:Q61781:A1L317:P19001:P05784:Q9QWL7:A6BLY7			PEAKS DB
SDVELDDLEKDEL	25.83	1518.69	13	0.9	760.353	63		236.76					2	F2:10666	20150812RA rerun MIN6N8_AGE-BSA Db pooled.wiff	1	0	1	0	0	0	0	Q922R8			PEAKS DB
SAPRNFVENFSVI	21.32	1478.75	13	-4.5	740.378	70.37		27.168			0		2	F2:11782	20150812RA rerun MIN6N8_AGE-BSA Db pooled.wiff	1	0	1	0	0	0	0	Q91WG4			PEAKS DB
ASLTNPFGKGAFI	38.62	1321.7	13	-3.2	661.855	71.34		113.45		115.85	206.31		2	F2:11903	20150812RA rerun MIN6N8_AGE-BSA Db pooled.wiff	3	0	1	0	1	1	0	Q99LH1			PEAKS DB
SVM(+15.99)ENSKVLGEAM	16.02	1409.65	13	-4.2	705.829	45.04					0		5	F5:9597	20150812RA rerun MIN6N8_Recon ALT Db pooled.wiff	0	0	0	0	0	0	0	P26039	Oxidation (M)	M3:Oxidation (M):48.11	PEAKS DB
ELGGGPGAGDLQT	51.08	1170.55	13	-3.6	586.281	43.19						110.89	6	F6:8178	20150812RA rerun MIN6N8_UT Db pooled.wiff	1	0	0	0	0	0	1	P01326			PEAKS DB
FVKQHLC(+31.99)GSHLVE	30.14	1527.75	13	-7.3	510.252	43.54	18.503						1	F1:7235	20150812RA rerun MIN6N8_AGE-BSA ALT Db pooled.wiff	1	1	0	0	0	0	0	P01326	Dihydroxy	C7:Dihydroxy:46.31	PEAKS PTM
SM(+15.99)AEPKTVYWDRDM	45.95	1743.76	14	7.3	582.263	48.52		0	21.738				2	F2:7880	20150812RA rerun MIN6N8_AGE-BSA Db pooled.wiff	1	0	0	1	0	0	0	P01887	Oxidation (M)	M2:Oxidation (M):96.93	PEAKS DB
SMAEPKTVYWDRDM	57.34	1727.76	14	-1.6	576.927	52.58	245.49	209.21	74.688	135.64			2	F2:8488	20150812RA rerun MIN6N8_AGE-BSA Db pooled.wiff	4	1	1	1	1	0	0	P01887			PEAKS DB
SQENPNTYSEDLDV	43.96	1609.67	14	-0.2	805.841	53.19	726.24	238.45	500.95	1273	331.82		1	F1:8311	20150812RA rerun MIN6N8_AGE-BSA ALT Db pooled.wiff	5	1	1	1	1	1	0	O35417			PEAKS DB
LELGGGPGAGDLQT	45.87	1283.64	14	-1.3	642.822	53.89	1633.3	481.74	1075.5	430.8	188.59		1	F1:8388	20150812RA rerun MIN6N8_AGE-BSA ALT Db pooled.wiff	5	1	1	1	1	1	0	P01326			PEAKS DB
CNTAT(-2.02)CATQRLANF	18.74	1510.67	14	1.2	756.338	55.39			223.78				3	F3:9975	20150812RA rerun MIN6N8_BSA ALT Db pooled.wiff	1	0	0	1	0	0	0	P12968	2-amino-3-oxo-butanoic_acid	T5:2-amino-3-oxo-butanoic_acid:9.40	PEAKS PTM
SALLLEPYKPPSTQ	49.57	1542.83	14	2	772.421	57.66		225.17	29.671				3	F3:10407	20150812RA rerun MIN6N8_BSA ALT Db pooled.wiff	2	0	1	1	0	0	0	O54984			PEAKS DB
TAGGGGGGGGAAPP	18.88	982.447	14	48.9	492.253	61.79			802.53				3	F3:11140	20150812RA rerun MIN6N8_BSA ALT Db pooled.wiff	1	0	0	1	0	0	0	Q00196			PEAKS DB
SSPSNPNGNFNVVI	17.44	1444.69	14	1.8	723.353	61.79			343.65				3	F3:11111	20150812RA rerun MIN6N8_BSA ALT Db pooled.wiff	1	0	0	1	0	0	0	A2AWL7			PEAKS DB
ALAPGSQSSEMSLR	62.36	1432.7	14	-4.7	717.353	42.39	2.9076	48.514	0			165.74	6	F6:8124	20150812RA rerun MIN6N8_UT Db pooled.wiff	3	1	1	0	0	0	1	P01899			PEAKS DB
SMAEPKTVYWDRDM(+15.99)	51.56	1743.76	14	-3.1	582.259	46.28	20.932	39.697	0			26.624	6	F6:8486	20150812RA rerun MIN6N8_UT Db pooled.wiff	3	1	1	0	0	0	1	P01887	Oxidation (M)	M14:Oxidation (M):106.18	PEAKS DB
GPTAAGPTM(+15.99)GPPED	15.14	1312.56	14	-40.2	657.259	62.07			0				3	F3:11189	20150812RA rerun MIN6N8_BSA ALT Db pooled.wiff	0	0	0	0	0	0	0	Q80WY3	Oxidation (M)	M9:Oxidation (M):1000.00	PEAKS DB
ALAPGSQSSEM(+15.99)SLR	37.05	1448.69	14	-1.9	725.352	33.84	47.061	0				221.32	6	F6:7054	20150812RA rerun MIN6N8_UT Db pooled.wiff	2	1	0	0	0	0	1	P01899	Oxidation (M)	M11:Oxidation (M):1000.00	PEAKS DB
YLNQEQAEQGREHL	67.68	1713.81	14	-0.1	572.276	37.94	290.6					44.558	6	F6:7711	20150812RA rerun MIN6N8_UT Db pooled.wiff	2	1	0	0	0	0	1	Q03517			PEAKS DB
CNTATC(+126.10)ATQRLANF	17.59	1638.79	14	-14.5	547.259	48.97	2112.7						1	F1:7781	20150812RA rerun MIN6N8_AGE-BSA ALT Db pooled.wiff	1	1	0	0	0	0	0	P12968	Octanoyl	C6:Octanoyl:12.28	PEAKS PTM
TNEIVEEQYTPQSL	54.84	1649.78	14	4.5	825.898	58.72	891.85				639.97	0	5	F5:10932	20150812RA rerun MIN6N8_Recon ALT Db pooled.wiff	2	1	0	0	0	1	0	Q03517			PEAKS DB
PAPTASSCDETCIG	15.51	1350.54	14	-37.9	676.25	44.22	0						1	F1:7288	20150812RA rerun MIN6N8_AGE-BSA ALT Db pooled.wiff	0	0	0	0	0	0	0	Q149F3			PEAKS DB
GQQGYGQQGAPTSF	22.67	1424.63	14	10.6	713.329	45.65		80.234					2	F2:7532	20150812RA rerun MIN6N8_AGE-BSA Db pooled.wiff	1	0	1	0	0	0	0	Q62277			PEAKS DB
AADGAAEPGVVLQM(+15.99)	26.95	1343.64	14	4.4	672.828	46.05		42.887					2	F2:7599	20150812RA rerun MIN6N8_AGE-BSA Db pooled.wiff	1	0	1	0	0	0	0	P35564	Oxidation (M)	M14:Oxidation (M):1000.00	PEAKS DB
SEAREDMAALEKDY	20.23	1626.72	14	0.1	543.246	50.02		52.866					2	F2:8125	20150812RA rerun MIN6N8_AGE-BSA Db pooled.wiff	1	0	1	0	0	0	0	P68368:P68373:P68369:P05213			PEAKS DB
AGGHKLGLGLEFQA	29.09	1396.75	14	-2.4	699.377	56.6		185					2	F2:9259	20150812RA rerun MIN6N8_AGE-BSA Db pooled.wiff	1	0	1	0	0	0	0	Q60932			PEAKS DB
AGGHKLGLALELEA	18.04	1377.76	14	-7.5	689.881	57.62				28.076			4	F4:9592	20150812RA rerun MIN6N8_BSA Db pooled.wiff	1	0	0	0	1	0	0	Q60930			PEAKS DB
GLLPSPLAVAAVMA	17.24	1308.75	14	1.9	655.381	70.66		109.11					2	F2:11816	20150812RA rerun MIN6N8_AGE-BSA Db pooled.wiff	1	0	1	0	0	0	0	Q8VD12			PEAKS DB
SGSELVQKFIGEGA	19.73	1420.72	14	-4.7	711.362	63.9		0					2	F2:10802	20150812RA rerun MIN6N8_AGE-BSA Db pooled.wiff	0	0	0	0	0	0	0	P62196			PEAKS DB
AVPRGEAAGAVQELA	26.24	1437.76	15	10.3	719.891	45.86			24.05			42.67	3	F3:8875	20150812RA rerun MIN6N8_BSA ALT Db pooled.wiff	2	0	0	1	0	0	1	Q9QXV0			PEAKS DB
LAGGTLVADVLTRFE	19.4	1560.85	15	-23.8	781.412	59.17		1003.7	101.18				2	F2:9845	20150812RA rerun MIN6N8_AGE-BSA Db pooled.wiff	2	0	1	1	0	0	0	Q8VCE9			PEAKS DB
LELGGGPGAGDLQTL	43.18	1396.72	15	-1.9	699.364	66.26		94.687					2	F2:11232	20150812RA rerun MIN6N8_AGE-BSA Db pooled.wiff	1	0	1	0	0	0	0	P01326			PEAKS DB
YLNQEQAEQGREHLA	54.4	1784.84	15	10.1	595.96	36.71	335.48	0				0	2	F2:6744	20150812RA rerun MIN6N8_AGE-BSA Db pooled.wiff	1	1	0	0	0	0	0	Q03517			PEAKS DB
VEQLELGGSPGDLQT	34.19	1541.76	15	-1.7	771.881	57.91	36.858						1	F1:8955	20150812RA rerun MIN6N8_AGE-BSA ALT Db pooled.wiff	1	1	0	0	0	0	0	P01325			PEAKS DB
M(+15.99)QIFVKTLTGKTITL	42.48	1708.98	15	1.6	570.667	68.08	303.67	1078.2		179.33			2	F2:11491	20150812RA rerun MIN6N8_AGE-BSA Db pooled.wiff	3	1	1	0	1	0	0	P62984:P62983:P0CG49:P0CG50	Oxidation (M)	M1:Oxidation (M):1000.00	PEAKS DB
MQIFVKTLTGKTITL	41.81	1692.98	15	3.5	565.336	74.13		271.29		8.2546	0		2	F2:12099	20150812RA rerun MIN6N8_AGE-BSA Db pooled.wiff	2	0	1	0	1	0	0	P62984:P62983:P0CG49:P0CG50			PEAKS DB
ALAPGSQSSEM(+15.99)SLRD	44.04	1563.72	15	2.4	782.867	35		50.722				12.797	2	F2:6540	20150812RA rerun MIN6N8_AGE-BSA Db pooled.wiff	2	0	1	0	0	0	1	P01899	Oxidation (M)	M11:Oxidation (M):1000.00	PEAKS DB
VVYENMKQTLGVAQK	42.9	1706.9	15	4	569.976	45.26		26.935					2	F2:7489	20150812RA rerun MIN6N8_AGE-BSA Db pooled.wiff	1	0	1	0	0	0	0	Q8BMD8			PEAKS DB
DQEAYTRIQAGEEKL	15.5	1749.85	15	-1.8	584.289	48.66		115.66					2	F2:7894	20150812RA rerun MIN6N8_AGE-BSA Db pooled.wiff	1	0	1	0	0	0	0	Q91VE0			PEAKS DB
AGIGGLGGGGGALGP	15.84	1109.58	15	-21.2	555.786	55.24		5695.8					2	F2:8952	20150812RA rerun MIN6N8_AGE-BSA Db pooled.wiff	1	0	1	0	0	0	0	P54320			PEAKS DB
TTAHYVVFPSGSLEE	27.86	1635.78	15	-2.8	818.892	59.29		93.588					2	F2:9874	20150812RA rerun MIN6N8_AGE-BSA Db pooled.wiff	1	0	1	0	0	0	0	Q8BLQ7			PEAKS DB
SNYFDPSKIQLPEDD	27.38	1766.8	15	-3.2	884.402	65.06		57.571					2	F2:10976	20150812RA rerun MIN6N8_AGE-BSA Db pooled.wiff	1	0	1	0	0	0	0	O09111			PEAKS DB
KCNTAT(-2.02)CATQRLANF	22.92	1638.76	15	2.9	547.261	49.02				678.71		3719.9	4	F4:8237	20150812RA rerun MIN6N8_BSA Db pooled.wiff	2	0	0	0	1	0	1	P12968	2-amino-3-oxo-butanoic_acid	T6:2-amino-3-oxo-butanoic_acid:9.40	PEAKS PTM
EAIDSYIKADDPSSY	24.17	1672.75	15	-1.5	837.377	56.08				85.68			4	F4:9333	20150812RA rerun MIN6N8_BSA Db pooled.wiff	1	0	0	0	1	0	0	Q68FD5			PEAKS DB
ALAPGSQSSEMSLRD	46.14	1547.72	15	1.9	774.871	43.08						43.002	6	F6:8174	20150812RA rerun MIN6N8_UT Db pooled.wiff	1	0	0	0	0	0	1	P01899			PEAKS DB
IPVGSLKNEDTPNRQY	80.95	1829.93	16	-2.7	610.981	40.74	488.57					188.49	6	F6:8032	20150812RA rerun MIN6N8_UT Db pooled.wiff	2	1	0	0	0	0	1	Q03517			PEAKS DB
LLDEGHYPVRESPIDT	45.72	1839.9	16	2.8	614.307	49.19	78.761					29.268	1	F1:7865	20150812RA rerun MIN6N8_AGE-BSA ALT Db pooled.wiff	2	1	0	0	0	0	1	P16014			PEAKS DB
PQVEQLELGGSPGDLQ	22.57	1665.82	16	-0.9	833.913	60.26	39.567						1	F1:9198	20150812RA rerun MIN6N8_AGE-BSA ALT Db pooled.wiff	1	1	0	0	0	0	0	P01325			PEAKS DB
M(+15.99)ERLSVDYGKKSKLEF	48.12	1945	16	6.1	487.259	46.33		246.53					2	F2:7650	20150812RA rerun MIN6N8_AGE-BSA Db pooled.wiff	1	0	1	0	0	0	0	P68368:P68373:P68369:P05213	Oxidation (M)	M1:Oxidation (M):1000.00	PEAKS DB
PQEIVDYIADKKDVYE	35.17	1923.95	16	-0.5	642.321	58.14		845.36					2	F2:9589	20150812RA rerun MIN6N8_AGE-BSA Db pooled.wiff	1	0	1	0	0	0	0	Q9CR21			PEAKS DB
HSQGTFTSDYSKYLDS	80.21	1834.8	16	0.8	612.606	54.28				156.99			4	F4:9094	20150812RA rerun MIN6N8_BSA Db pooled.wiff	1	0	0	0	1	0	0	P55095			PEAKS DB
ASAEPSEAAGGSVQAN	16.17	1444.64	16	35.9	723.353	61.83				221.42			4	F4:10135	20150812RA rerun MIN6N8_BSA Db pooled.wiff	1	0	0	0	1	0	0	P49452			PEAKS DB
VLEYLNQEQAEQGREHL	66.12	2055	17	-1.8	686.004	51.68	174.18						1	F1:8123	20150812RA rerun MIN6N8_AGE-BSA ALT Db pooled.wiff	1	1	0	0	0	0	0	Q03517			PEAKS DB
PQVEQLELGGSPGDLQT	62.15	1766.87	17	6.5	884.444	61	83.155						1	F1:9272	20150812RA rerun MIN6N8_AGE-BSA ALT Db pooled.wiff	1	1	0	0	0	0	0	P01325			PEAKS DB
ELVETRPAGDGTFQKWA	39.92	1903.94	17	0.6	635.654	53.6		361.74					2	F2:8710	20150812RA rerun MIN6N8_AGE-BSA Db pooled.wiff	1	0	1	0	0	0	0	P01899:P01902			PEAKS DB
DSYM(+15.99)IPTNDLKPGELRL	27.01	1976.99	17	-7.8	659.996	65.91		49.529					2	F2:11173	20150812RA rerun MIN6N8_AGE-BSA Db pooled.wiff	1	0	1	0	0	0	0	P00405	Oxidation (M)	M4:Oxidation (M):1000.00	PEAKS DB
AQLELGGGPGAGDLQTL	43.4	1595.82	17	-7.6	798.907	67.23		195.68					2	F2:11367	20150812RA rerun MIN6N8_AGE-BSA Db pooled.wiff	1	0	1	0	0	0	0	P01326			PEAKS DB
ETELFYKGIRPAINVGL	19.74	1919.05	17	-1.4	640.689	69.34		165.04					2	F2:11686	20150812RA rerun MIN6N8_AGE-BSA Db pooled.wiff	1	0	1	0	0	0	0	Q03265			PEAKS DB
V(+226.08)LEYLNQEQAEQGREHL	25.87	2281.08	17	-23	571.263	37.75		0					2	F2:6941	20150812RA rerun MIN6N8_AGE-BSA Db pooled.wiff	0	0	0	0	0	0	0	Q03517	Biotinylation	V1:Biotinylation:1000.00	PEAKS PTM
PQVAQLELGGGPGAGDLQ	61.53	1705.86	18	3.4	853.938	61.23	122.96		14.44	18.481			1	F1:9304	20150812RA rerun MIN6N8_AGE-BSA ALT Db pooled.wiff	3	1	0	1	1	0	0	P01326			PEAKS DB
SSNNLGPVLPPTNVGSNT	25.29	1766.88	18	-1.6	884.443	54.79	479.41	25.85		127.89	85.893		4	F4:9134	20150812RA rerun MIN6N8_BSA Db pooled.wiff	4	1	1	0	1	1	0	P12968			PEAKS DB
NVINGGSHAGNKLAM(+15.99)QEF	15.8	1901.91	18	1.6	634.975	44.12		53.86					2	F2:7389	20150812RA rerun MIN6N8_AGE-BSA Db pooled.wiff	1	0	1	0	0	0	0	P21550	Oxidation (M)	M15:Oxidation (M):1000.00	PEAKS DB
M(+15.99)ELVETRPAGDGTFQKWA	16.86	2050.98	18	2.1	684.667	54.17		229.03					2	F2:8830	20150812RA rerun MIN6N8_AGE-BSA Db pooled.wiff	1	0	1	0	0	0	0	P01899:P01902	Oxidation (M)	M1:Oxidation (M):1000.00	PEAKS DB
MELVETRPAGDGTFQKWA	19.18	2034.98	18	4.4	679.336	58.94		168.22					2	F2:9801	20150812RA rerun MIN6N8_AGE-BSA Db pooled.wiff	1	0	1	0	0	0	0	P01899:P01902			PEAKS DB
SAM(+15.99)GAAYGTAKSGTGIAA	26.66	1599.76	18	-6.5	800.878	36.09		0					2	F2:6668	20150812RA rerun MIN6N8_AGE-BSA Db pooled.wiff	0	0	0	0	0	0	0	P63082	Oxidation (M)	M3:Oxidation (M):1000.00	PEAKS DB
LKAGEKPNGLVEPEQDLE	31.83	1965.01	18	-0.6	656.009	45.54						58.532	6	F6:8372	20150812RA rerun MIN6N8_UT Db pooled.wiff	1	0	0	0	0	0	1	Q03517			PEAKS DB
NAPPEPVPPPRAAPAPTHV	36.49	1914.01	19	1.4	639.009	41.45	231.96					239.51	1	F1:7100	20150812RA rerun MIN6N8_AGE-BSA ALT Db pooled.wiff	2	1	0	0	0	0	1	Q0VGU4			PEAKS DB
TQDMELVETRPAGDGTFQK	36.02	2122	19	4.6	708.341	47.72	69.268	96.746					1	F1:7634	20150812RA rerun MIN6N8_AGE-BSA ALT Db pooled.wiff	2	1	1	0	0	0	0	P01899:P01902			PEAKS DB
LERGGDPTKEPEPVVHYDI	57.29	2150.06	19	1.6	538.523	48.14	117.44	1273		636.74			2	F2:7846	20150812RA rerun MIN6N8_AGE-BSA Db pooled.wiff	4	1	1	0	2	0	0	Q9D6J5			PEAKS DB
SSNNLGPVLPPTNVGSNTY(-.98)	26.27	1928.96	19	1.1	965.484	58.42	6644.2			10103			1	F1:9035	20150812RA rerun MIN6N8_AGE-BSA ALT Db pooled.wiff	2	1	0	0	1	0	0	P12968	Amidation	Y19:Amidation:1000.00	PEAKS PTM
SNNLGPVLPPTNVGSNTYG	35.31	1899.93	19	1.6	950.972	59.72				758.71			4	F4:9887	20150812RA rerun MIN6N8_BSA Db pooled.wiff	1	0	0	0	1	0	0	P12968			PEAKS DB
PQVAQLELGGGPGAGDLQT	46.02	1806.91	19	-1.3	904.458	61.91	54.592						1	F1:9375	20150812RA rerun MIN6N8_AGE-BSA ALT Db pooled.wiff	1	1	0	0	0	0	0	P01326			PEAKS DB
TQDM(+15.99)ELVETRPAGDGTFQK	29.64	2137.99	19	4.3	713.674	41.9		93.254					2	F2:7226	20150812RA rerun MIN6N8_AGE-BSA Db pooled.wiff	1	0	1	0	0	0	0	P01899:P01902	Oxidation (M)	M4:Oxidation (M):1000.00	PEAKS DB
AVLIDYQRNVPAAREPEVL	40.18	2152.16	19	-0.9	718.393	59.51		74.032					2	F2:9924	20150812RA rerun MIN6N8_AGE-BSA Db pooled.wiff	1	0	1	0	0	0	0	Q6P5F9			PEAKS DB
ASQQQKPEDSTIPSTELAK	19.52	2057.03	19	3.1	686.684	37.91		0					2	F2:6954	20150812RA rerun MIN6N8_AGE-BSA Db pooled.wiff	0	0	0	0	0	0	0	Q9CX56			PEAKS DB
VDDTQFVRFDSDADNPRFE(+57.02)	28.83	2329.02	19	4.8	777.351	53.52					281.17		5	F5:10434	20150812RA rerun MIN6N8_Recon ALT Db pooled.wiff	1	0	0	0	0	1	0	P01902	Carbamidomethylation (DHKE X@N-term)	E19:Carbamidomethylation (DHKE X@N-term):2.87	PEAKS PTM
VDDTQFVRFDSDAD(+57.02)NPRFE	22.19	2329.02	19	-1.6	777.345	53.48			336.05	351.4			4	F4:8976	20150812RA rerun MIN6N8_BSA Db pooled.wiff	2	0	0	1	1	0	0	P01902	Carbamidomethylation (DHKE X@N-term)	D14:Carbamidomethylation (DHKE X@N-term):4.75	PEAKS PTM
SSNNLGPVLPPTNVGSNTYG	32.86	1986.96	20	3.5	994.49	59.38	9214.9	4213	3311.2	20415		0	3	F3:10678	20150812RA rerun MIN6N8_BSA ALT Db pooled.wiff	4	1	1	1	1	0	0	P12968			PEAKS DB
ELQETQQERENEREEEAEQE	37.54	2532.08	20	-0.8	845.031	31.37	39.264					34.627	1	F1:5733	20150812RA rerun MIN6N8_AGE-BSA ALT Db pooled.wiff	2	1	0	0	0	0	1	Q0VGU4			PEAKS DB
EVEDPQVAQLELGGGPGAGD	27.52	1936.9	20	5.7	969.459	60.37	62.18						1	F1:9205	20150812RA rerun MIN6N8_AGE-BSA ALT Db pooled.wiff	1	1	0	0	0	0	0	P01326			PEAKS DB
SALLDGKNVNAGGHKLGLGL	15.85	1933.07	20	2.9	645.366	55.02		104.1					2	F2:8939	20150812RA rerun MIN6N8_AGE-BSA Db pooled.wiff	1	0	1	0	0	0	0	Q60932			PEAKS DB
SALIDGKNFNAGGHKVGLGF	16.49	2001.04	20	0.8	501.267	57.46		227.45					2	F2:9437	20150812RA rerun MIN6N8_AGE-BSA Db pooled.wiff	1	0	1	0	0	0	0	Q60931			PEAKS DB
SALVDGKSFNAGGHKLGLAL	22.94	1954.06	20	1.1	652.361	58.48		230.97					2	F2:9712	20150812RA rerun MIN6N8_AGE-BSA Db pooled.wiff	1	0	1	0	0	0	0	Q60930			PEAKS DB
AENM(+15.99)VSQNDGSFISKKEWYV	40.67	2347.08	20	2.8	783.367	59.68		1579.2		101.03			2	F2:9956	20150812RA rerun MIN6N8_AGE-BSA Db pooled.wiff	2	0	1	0	1	0	0	Q9JKF6	Oxidation (M)	M4:Oxidation (M):1000.00	PEAKS DB
AENMVSQNDGSFISKKEWYV	42.19	2331.08	20	0.9	778.034	63.06		230.28					2	F2:10673	20150812RA rerun MIN6N8_AGE-BSA Db pooled.wiff	1	0	1	0	0	0	0	Q9JKF6			PEAKS DB
LVRSSNNLGPVLPPTNVGSNT	24.75	2135.13	21	0.7	712.717	52.66	544.97		68.618				3	F3:9606	20150812RA rerun MIN6N8_BSA ALT Db pooled.wiff	2	1	0	1	0	0	0	P12968			PEAKS DB
TQDM(+15.99)ELVETRPAGDGTFQKWA	34.33	2395.11	21	0.9	799.376	55.92	160.79	1746.1	170.32				2	F2:9071	20150812RA rerun MIN6N8_AGE-BSA Db pooled.wiff	3	1	1	1	0	0	0	P01899:P01902	Oxidation (M)	M4:Oxidation (M):1000.00	PEAKS DB
EVEDPQVEQLELGGSPGDLQT	36.62	2239.05	21	5.4	747.359	64.93	91.15			105.26	63.114		5	F5:11384	20150812RA rerun MIN6N8_Recon ALT Db pooled.wiff	3	1	0	0	1	1	0	P01325			PEAKS DB
EVEDPQVAQLELGGGPGAGDL	20.69	2049.99	21	6.1	684.338	69.51		25.348					2	F2:11702	20150812RA rerun MIN6N8_AGE-BSA Db pooled.wiff	1	0	1	0	0	0	0	P01326			PEAKS DB
AVLIDYQRNVPAAREPEVLST	56.77	2340.24	21	-0.3	781.086	57.69		586.72					2	F2:9501	20150812RA rerun MIN6N8_AGE-BSA Db pooled.wiff	1	0	1	0	0	0	0	Q6P5F9			PEAKS DB
TQDMELVETRPAGDGTFQKWA	29.78	2379.12	21	-1.2	794.043	60.49		632.55			97.534		2	F2:10137	20150812RA rerun MIN6N8_AGE-BSA Db pooled.wiff	2	0	1	0	0	1	0	P01899:P01902			PEAKS DB
SDAENPRYEPRAPWM(+15.99)EQEGPEY	44.94	2666.13	22	2	889.718	53.32		2269.1	107.05		105.56		2	F2:8690	20150812RA rerun MIN6N8_AGE-BSA Db pooled.wiff	3	0	1	1	0	1	0	P01899	Oxidation (M)	M15:Oxidation (M):1000.00	PEAKS DB
EVEDPQVAQLELGGGPGAGDLQ	42.42	2178.04	22	8.5	727.026	65.39		196	163.41	82.544	126.43		5	F5:11426	20150812RA rerun MIN6N8_Recon ALT Db pooled.wiff	4	0	1	1	1	1	0	P01326			PEAKS DB
VRSSNNLGPVLPPTNVGSNTYG	41.32	2242.13	22	3.8	748.385	54.95	601.72			88.034			1	F1:8496	20150812RA rerun MIN6N8_AGE-BSA ALT Db pooled.wiff	2	1	0	0	1	0	0	P12968			PEAKS DB
LVRSSNNLGPVLPPTNVGSNTY(-.98)	28.04	2297.21	22	1.2	766.742	55.86	3092.1	364.32		1321.3	164.74		1	F1:8626	20150812RA rerun MIN6N8_AGE-BSA ALT Db pooled.wiff	4	1	1	0	1	1	0	P12968	Amidation	Y22:Amidation:1000.00	PEAKS PTM
SDAENPRYEPRAPWMEQEGPEY	42.67	2650.14	22	5.6	884.39	58.09		574.34			113.03		5	F5:10888	20150812RA rerun MIN6N8_Recon ALT Db pooled.wiff	2	0	1	0	0	1	0	P01899			PEAKS DB
SSEM(+15.99)ARDEDGGQDGDQVGHEDLY	93.43	2524.99	23	-2.6	842.665	39.61	906.29	280.64	37.896	74.521		870.45	3	F3:8302	20150812RA rerun MIN6N8_BSA ALT Db pooled.wiff	5	1	1	1	1	0	1	O35417	Oxidation (M)	M4:Oxidation (M):1000.00	PEAKS DB
DSDAENPRYEPRAPWM(+15.99)EQEGPEY	89.95	2781.16	23	1	928.06	55.02	6521.6	88769	10530	11172	15813	0	2	F2:8914	20150812RA rerun MIN6N8_AGE-BSA Db pooled.wiff	7	1	3	1	1	1	0	P01899	Oxidation (M)	M16:Oxidation (M):1000.00	PEAKS DB
LVRSSNNLGPVLPPTNVGSNTYG	53.5	2355.22	23	-1.1	786.076	56.71	5805	1451.1	1082.8	5001	716.8		1	F1:8967	20150812RA rerun MIN6N8_AGE-BSA ALT Db pooled.wiff	5	1	1	1	1	1	0	P12968			PEAKS DB
EVEDPQVAQLELGGGPGAGDLQT	44.47	2279.09	23	-1.2	760.701	65.71	435.41	280.49	246.35	139.48	401	135.31	4	F4:10568	20150812RA rerun MIN6N8_BSA Db pooled.wiff	6	1	1	1	1	1	1	P01326			PEAKS DB
SSEMARDEDGGQDGDQVGHEDLY	76.95	2508.99	23	-1.8	837.337	42.91	49.103					46.5	6	F6:8158	20150812RA rerun MIN6N8_UT Db pooled.wiff	2	1	0	0	0	0	1	O35417			PEAKS DB
DSDAENPRYEPRAPWMEQEGPEY	85.57	2765.17	23	0.6	922.728	59.75	621.15	28261		7361.9	13849	0	2	F2:10007	20150812RA rerun MIN6N8_AGE-BSA Db pooled.wiff	4	1	1	0	1	1	0	P01899			PEAKS DB
LQSFDEITAM(+15.99)TGDGVNDAPALKK	48.65	2436.18	23	1.2	813.068	56.09		627.96					2	F2:9117	20150812RA rerun MIN6N8_AGE-BSA Db pooled.wiff	1	0	1	0	0	0	0	O55143	Oxidation (M)	M10:Oxidation (M):1000.00	PEAKS DB
DSDAENPRYEPRAPWM(+31.99)EQEGPEY	33.97	2797.16	23	1.7	933.392	50.13	285.15	5941.4	271.39	149.91	133.4		2	F2:8210	20150812RA rerun MIN6N8_AGE-BSA Db pooled.wiff	5	1	1	1	1	1	0	P01899	Sulphone	M16:Sulphone:1000.00	PEAKS PTM
DSDAENPRYEPRAPW(+31.99)MEQEGPEY	20.4	2797.16	23	3	933.392	50.15	82.658		271.39				3	F3:9269	20150812RA rerun MIN6N8_BSA ALT Db pooled.wiff	2	1	0	1	0	0	0	P01899	Dihydroxy	W15:Dihydroxy:8.28	PEAKS PTM
DSDAENPRYEPRAPWM(+47.94)EQEGPEY	24.97	2813.11	23	13.4	938.721	50.98		8134.9					2	F2:8306	20150812RA rerun MIN6N8_AGE-BSA Db pooled.wiff	1	0	1	0	0	0	0	P01899	Selenium replaces sulphur	M16:Selenium replaces sulphur:1000.00	PEAKS PTM
DSDAENPRYEPRAP(+31.99)WMEQEGPEY	18.92	2797.16	23	1.7	933.392	50.13		5941.4					2	F2:8130	20150812RA rerun MIN6N8_AGE-BSA Db pooled.wiff	1	0	1	0	0	0	0	P01899	Dihydroxy	P14:Dihydroxy:5.03	PEAKS PTM
FETAVSRPGLEEPRYISVGYVDNKE	27.67	2854.41	25	1.6	714.61	56.6		421.61					2	F2:9243	20150812RA rerun MIN6N8_AGE-BSA Db pooled.wiff	1	0	1	0	0	0	0	P01899			PEAKS DB
QGGVSKGMFSSFYFIVLTLFGNYTL	18.44	2775.4	25	-39.9	556.063	64.6		0					2	F2:10911	20150812RA rerun MIN6N8_AGE-BSA Db pooled.wiff	0	0	0	0	0	0	0	O55017			PEAKS DB
RWIEQEGPEYWERETWKARDM(+15.99)GRNF	22.43	3284.52	25	-29.8	657.892	41.82						0	6	F6:8087	20150812RA rerun MIN6N8_UT Db pooled.wiff	0	0	0	0	0	0	0		Oxidation (M)	M21:Oxidation (M):1000.00	PEAKS DB
