# Supplementary material for: Short Duration Alagebrium Chloride Therapy Prediabetes Does Not Inhibit Progression to Autoimmune Diabetes in an Experimental Model
Source: Metabolites. 2021 Jun 28;11(7):426. doi: 10.3390/metabo11070426 (PMC8305727; doi:10.3390/metabo11070426)
Supplement: Supplementary file 1 [file metabolites-11-00426-s001.zip › Table S3-proteomics.xlsx]

## Sheet: proteins
Protein Group	Protein ID	Accession	Significance	-10lgP	Intensity TMT10-127C	Intensity TMT10-129N	Intensity TMT10-126	Intensity TMT10-127N	Intensity TMT10-130N	Intensity TMT10-131	Ratio TMT10-127C	Ratio TMT10-129N	Ratio TMT10-126	Ratio TMT10-127N	Ratio TMT10-130N	Ratio TMT10-131	Intensity UT(TMT10-127C)	Intensity BSA(TMT10-129N)	Intensity AGE-BSA(TMT10-126)	Intensity ALT(TMT10-127N)	Intensity AGE-BSA-ALT(TMT10-130N)	Intensity BSA-ALT(TMT10-131)	Ratio UT(TMT10-127C)	Ratio BSA(TMT10-129N)	Ratio AGE-BSA(TMT10-126)	Ratio ALT(TMT10-127N)	Ratio AGE-BSA-ALT(TMT10-130N)	Ratio BSA-ALT(TMT10-131)	Coverage (%)	#Peptides	#Unique	PTM	Avg. Mass	Description
3	65	Q9JHU4	3.17	493.19	29215000	30478000	28258000	27791000	31056000	29521000	0.96	1	0.93	0.91	1.02	0.97	29215000	30478000	28258000	27791000	31056000	29521000	0.96	1	0.93	0.91	1.02	0.97	39	165	165	Carbamidomethylation; TMT10plex	532050	Cytoplasmic dynein 1 heavy chain 1 OS=Mus musculus OX=10090 GN=Dync1h1 PE=1 SV=2
34	54	Q80X90	5.33	488.5	8393200	8277500	7738400	8744800	7817700	8953300	1.01	1	0.93	1.06	0.94	1.08	8393200	8277500	7738400	8744800	7817700	8953300	1.01	1	0.93	1.06	0.94	1.08	37	73	70	Carbamidomethylation; TMT10plex	277822	Filamin-B OS=Mus musculus OX=10090 GN=Flnb PE=1 SV=3
18	38	P19096	5.81	471.57	37540000	41551000	35569000	35681000	36786000	38138000	0.9	1	0.86	0.86	0.89	0.92	37540000	41551000	35569000	35681000	36786000	38138000	0.9	1	0.86	0.86	0.89	0.92	41	85	85	Carbamidomethylation; TMT10plex; Oxidation (M)	272426	Fatty acid synthase OS=Mus musculus OX=10090 GN=Fasn PE=1 SV=2
1	14	Q91V92	6.49	465.78	244440000	242210000	247750000	233310000	214080000	209320000	1.01	1	1.02	0.96	0.88	0.86	244440000	242210000	247750000	233310000	214080000	209320000	1.01	1	1.02	0.96	0.88	0.86	66	73	73	Carbamidomethylation; TMT10plex; Oxidation (M)	119728	ATP-citrate synthase OS=Mus musculus OX=10090 GN=Acly PE=1 SV=1
15	71	Q68FD5	12.13	452.22	52100000	57012000	52868000	44342000	49194000	43385000	0.91	1	0.93	0.78	0.86	0.76	52100000	57012000	52868000	44342000	49194000	43385000	0.91	1	0.93	0.78	0.86	0.76	52	79	79	Carbamidomethylation; TMT10plex; Oxidation (M)	191555	Clathrin heavy chain 1 OS=Mus musculus OX=10090 GN=Cltc PE=1 SV=3
2	75	P20029	5.51	450.71	209800000	202430000	193600000	213840000	198270000	224830000	1.04	1	0.96	1.06	0.98	1.11	209800000	202430000	193600000	213840000	198270000	224830000	1.04	1	0.96	1.06	0.98	1.11	65	51	48	TMT10plex; Oxidation (M)	72422	Endoplasmic reticulum chaperone BiP OS=Mus musculus OX=10090 GN=Hspa5 PE=1 SV=3
45	30	Q8CGC7	2.34	439.98	13877000	13451000	13632000	13166000	13771000	12763000	1.03	1	1.01	0.98	1.02	0.95	13877000	13451000	13632000	13166000	13771000	12763000	1.03	1	1.01	0.98	1.02	0.95	42	59	59	Carbamidomethylation; TMT10plex; Oxidation (M)	170078	Bifunctional glutamate/proline--tRNA ligase OS=Mus musculus OX=10090 GN=Eprs1 PE=1 SV=4
11	42	P63017	4.25	438.31	75768000	73706000	74192000	71669000	68123000	67006000	1.03	1	1.01	0.97	0.92	0.91	75768000	73706000	74192000	71669000	68123000	67006000	1.03	1	1.01	0.97	0.92	0.91	44	48	31	Carbamidomethylation; TMT10plex; Oxidation (M)	70871	Heat shock cognate 71 kDa protein OS=Mus musculus OX=10090 GN=Hspa8 PE=1 SV=1
29	7	Q8VDN2	4.19	434.64	23257000	23145000	23301000	20744000	20636000	21338000	1	1	1.01	0.9	0.89	0.92	23257000	23145000	23301000	20744000	20636000	21338000	1	1	1.01	0.9	0.89	0.92	27	48	29	Carbamidomethylation; TMT10plex; Oxidation (M)	112982	Sodium/potassium-transporting ATPase subunit alpha-1 OS=Mus musculus OX=10090 GN=Atp1a1 PE=1 SV=1
81	181	Q6P5E4	3.56	434.18	18188000	18091000	17023000	18946000	17094000	17118000	1.01	1	0.94	1.05	0.94	0.95	18188000	18091000	17023000	18946000	17094000	17118000	1.01	1	0.94	1.05	0.94	0.95	44	54	54	Carbamidomethylation; TMT10plex; Oxidation (M)	176433	UDP-glucose:glycoprotein glucosyltransferase 1 OS=Mus musculus OX=10090 GN=Uggt1 PE=1 SV=4
24	73	O55143	3.68	433.86	24948000	24187000	23631000	22353000	21768000	23548000	1.03	1	0.98	0.92	0.9	0.97	24948000	24187000	23631000	22353000	21768000	23548000	1.03	1	0.98	0.92	0.9	0.97	24	48	28	Carbamidomethylation; TMT10plex; Oxidation (M)	114858	Sarcoplasmic/endoplasmic reticulum calcium ATPase 2 OS=Mus musculus OX=10090 GN=Atp2a2 PE=1 SV=2
4	36	P17182	11.47	432.36	90071000	85836000	94346000	90245000	87647000	73469000	1.05	1	1.1	1.05	1.02	0.86	90071000	85836000	94346000	90245000	87647000	73469000	1.05	1	1.1	1.05	1.02	0.86	62	34	27	Carbamidomethylation; TMT10plex; Oxidation (M)	47141	Alpha-enolase OS=Mus musculus OX=10090 GN=Eno1 PE=1 SV=3
71	74	P57780	10.41	431.13	13506000	12177000	14055000	13130000	11119000	11955000	1.11	1	1.15	1.08	0.91	0.98	13506000	12177000	14055000	13130000	11119000	11955000	1.11	1	1.15	1.08	0.91	0.98	35	42	29	Carbamidomethylation; TMT10plex; Oxidation (M)	104977	Alpha-actinin-4 OS=Mus musculus OX=10090 GN=Actn4 PE=1 SV=1
7	70	P08113	4.31	423.51	129310000	126070000	117150000	132650000	118390000	124300000	1.03	1	0.93	1.05	0.94	0.99	129310000	126070000	117150000	132650000	118390000	124300000	1.03	1	0.93	1.05	0.94	0.99	55	51	49	Carbamidomethylation; TMT10plex; Oxidation (M)	92476	Endoplasmin OS=Mus musculus OX=10090 GN=Hsp90b1 PE=1 SV=2
28	33	Q9JKR6	7.87	419.69	85435000	78740000	75187000	86641000	71407000	77006000	1.09	1	0.95	1.1	0.91	0.98	85435000	78740000	75187000	86641000	71407000	77006000	1.09	1	0.95	1.1	0.91	0.98	52	54	54	Carbamidomethylation; TMT10plex; Oxidation (M)	111181	Hypoxia up-regulated protein 1 OS=Mus musculus OX=10090 GN=Hyou1 PE=1 SV=1
44	13	Q6PIC6	23.17	418.9	6945900	6432000	7658100	6315500	5180800	5275600	1.08	1	1.19	0.98	0.81	0.82	6945900	6432000	7658100	6315500	5180800	5275600	1.08	1	1.19	0.98	0.81	0.82	24	43	24	Carbamidomethylation; TMT10plex; Oxidation (M)	111691	Sodium/potassium-transporting ATPase subunit alpha-3 OS=Mus musculus OX=10090 GN=Atp1a3 PE=1 SV=1
64	552	Q02053	5.88	418.31	26516000	24435000	25550000	25229000	23350000	22588000	1.09	1	1.05	1.03	0.96	0.92	26516000	24435000	25550000	25229000	23350000	22588000	1.09	1	1.05	1.03	0.96	0.92	47	38	38	Carbamidomethylation; TMT10plex; Oxidation (M)	117809	Ubiquitin-like modifier-activating enzyme 1 OS=Mus musculus OX=10090 GN=Uba1 PE=1 SV=1
37	18	P38647	5.53	417.18	26660000	26443000	27515000	24679000	23685000	26448000	1.01	1	1.04	0.93	0.9	1	26660000	26443000	27515000	24679000	23685000	26448000	1.01	1	1.04	0.93	0.9	1	57	43	42	Carbamidomethylation; TMT10plex; Oxidation (M)	73461	Stress-70 protein mitochondrial OS=Mus musculus OX=10090 GN=Hspa9 PE=1 SV=3
6	3	Q03265	8.25	414.47	104200000	99032000	100180000	98306000	83797000	90286000	1.05	1	1.01	0.99	0.85	0.91	104200000	99032000	100180000	98306000	83797000	90286000	1.05	1	1.01	0.99	0.85	0.91	63	40	40	Carbamidomethylation; TMT10plex; Oxidation (M)	59753	ATP synthase subunit alpha mitochondrial OS=Mus musculus OX=10090 GN=Atp5f1a PE=1 SV=1
35	186	Q01853	4.78	413.59	39374000	36810000	36865000	36860000	32486000	36716000	1.07	1	1	1	0.88	1	39374000	36810000	36865000	36860000	32486000	36716000	1.07	1	1	1	0.88	1	57	47	46	Carbamidomethylation; TMT10plex; Oxidation (M)	89322	Transitional endoplasmic reticulum ATPase OS=Mus musculus OX=10090 GN=Vcp PE=1 SV=4
49	47	P14873	2.29	411.58	17603000	17441000	18376000	18176000	17052000	18166000	1.01	1	1.05	1.04	0.98	1.04	17603000	17441000	18376000	18176000	17052000	18166000	1.01	1	1.05	1.04	0.98	1.04	28	61	60	Carbamidomethylation; TMT10plex	270252	Microtubule-associated protein 1B OS=Mus musculus OX=10090 GN=Map1b PE=1 SV=2
14	10	P58252	4	409.05	50206000	51733000	46695000	46012000	46535000	48086000	0.97	1	0.9	0.89	0.9	0.93	50206000	51733000	46695000	46012000	46535000	48086000	0.97	1	0.9	0.89	0.9	0.93	61	56	55	Carbamidomethylation; TMT10plex; Oxidation (M)	95314	Elongation factor 2 OS=Mus musculus OX=10090 GN=Eef2 PE=1 SV=2
10	6	P11499	4.47	408.68	27645000	28572000	25458000	28058000	26936000	24622000	0.97	1	0.89	0.98	0.94	0.86	27645000	28572000	25458000	28058000	26936000	24622000	0.97	1	0.89	0.98	0.94	0.86	40	49	32	Carbamidomethylation; TMT10plex; Oxidation (M)	83281	Heat shock protein HSP 90-beta OS=Mus musculus OX=10090 GN=Hsp90ab1 PE=1 SV=3
77	753	P26039	5.91	407.45	5283700	5549600	4741500	5016600	5018400	4913300	0.95	1	0.85	0.9	0.9	0.89	5283700	5549600	4741500	5016600	5018400	4913300	0.95	1	0.85	0.9	0.9	0.89	23	56	45	Carbamidomethylation; TMT10plex	269819	Talin-1 OS=Mus musculus OX=10090 GN=Tln1 PE=1 SV=2
55	107	Q6PB66	2.45	406.25	15044000	15549000	14367000	14485000	14955000	15266000	0.97	1	0.92	0.93	0.96	0.98	15044000	15549000	14367000	14485000	14955000	15266000	0.97	1	0.92	0.93	0.96	0.98	48	65	65	Carbamidomethylation; TMT10plex	156614	Leucine-rich PPR motif-containing protein mitochondrial OS=Mus musculus OX=10090 GN=Lrpprc PE=1 SV=2
5	4	P07901	7.92	402.92	61555000	60265000	58787000	55402000	53770000	50692000	1.02	1	0.98	0.92	0.89	0.84	61555000	60265000	58787000	55402000	53770000	50692000	1.02	1	0.98	0.92	0.89	0.84	38	48	33	Carbamidomethylation; TMT10plex; Oxidation (M)	84788	Heat shock protein HSP 90-alpha OS=Mus musculus OX=10090 GN=Hsp90aa1 PE=1 SV=4
83	96	Q9ERU9	6.31	401.49	6563700	6783900	6522500	6023600	5751500	6212400	0.97	1	0.96	0.89	0.85	0.92	6563700	6783900	6522500	6023600	5751500	6212400	0.97	1	0.96	0.89	0.85	0.92	22	60	58	Carbamidomethylation; TMT10plex; Oxidation (M)	341122	E3 SUMO-protein ligase RanBP2 OS=Mus musculus OX=10090 GN=Ranbp2 PE=1 SV=2
58	150	Q05920	2.61	399.83	24737000	25716000	25823000	25599000	23757000	25386000	0.96	1	1	1	0.92	0.99	24737000	25716000	25823000	25599000	23757000	25386000	0.96	1	1	1	0.92	0.99	42	44	44	Carbamidomethylation; TMT10plex; Oxidation (M)	129684	Pyruvate carboxylase mitochondrial OS=Mus musculus OX=10090 GN=Pc PE=1 SV=1
107	775	Q99KI0	4.38	399.83	17953000	19189000	18225000	17299000	17494000	16432000	0.94	1	0.95	0.9	0.91	0.86	17953000	19189000	18225000	17299000	17494000	16432000	0.94	1	0.95	0.9	0.91	0.86	37	31	31	Carbamidomethylation; TMT10plex; Oxidation (M)	85464	Aconitate hydratase mitochondrial OS=Mus musculus OX=10090 GN=Aco2 PE=1 SV=1
70	39	Q61768	5.02	399.25	9876000	9400500	9875900	9631600	8589800	9465100	1.05	1	1.05	1.02	0.91	1.01	9876000	9400500	9875900	9631600	8589800	9465100	1.05	1	1.05	1.02	0.91	1.01	46	53	41	Carbamidomethylation; TMT10plex	109551	Kinesin-1 heavy chain OS=Mus musculus OX=10090 GN=Kif5b PE=1 SV=3
46	43	Q99PL5	2.13	398.5	18055000	17143000	17281000	18297000	16744000	17657000	1.05	1	1.01	1.07	0.98	1.03	18055000	17143000	17281000	18297000	16744000	17657000	1.05	1	1.01	1.07	0.98	1.03	38	66	66	Carbamidomethylation; TMT10plex	172878	Ribosome-binding protein 1 OS=Mus musculus OX=10090 GN=Rrbp1 PE=1 SV=2
74	157	Q61543	10.58	398.09	16151000	17039000	16719000	14467000	13445000	15430000	0.95	1	0.98	0.85	0.79	0.91	16151000	17039000	16719000	14467000	13445000	15430000	0.95	1	0.98	0.85	0.79	0.91	40	51	51	Carbamidomethylation; TMT10plex	133734	Golgi apparatus protein 1 OS=Mus musculus OX=10090 GN=Glg1 PE=1 SV=1
157	1537	Q8BTM8	5	396.97	3320300	3263000	3105800	2889400	2938500	3123000	1.02	1	0.95	0.89	0.9	0.96	3320300	3263000	3105800	2889400	2938500	3123000	1.02	1	0.95	0.89	0.9	0.96	19	41	38	Carbamidomethylation; TMT10plex	281219	Filamin-A OS=Mus musculus OX=10090 GN=Flna PE=1 SV=5
8	2	P52480	3.31	396.84	61254000	59229000	64834000	62527000	61018000	58603000	1.03	1	1.09	1.06	1.03	0.99	61254000	59229000	64834000	62527000	61018000	58603000	1.03	1	1.09	1.06	1.03	0.99	68	37	35	Carbamidomethylation; TMT10plex; Oxidation (M)	57845	Pyruvate kinase PKM OS=Mus musculus OX=10090 GN=Pkm PE=1 SV=4
60	144	Q91ZU6	3.6	396.54	5077100	4832500	4840900	4871300	4345500	4667100	1.05	1	1	1.01	0.9	0.97	5077100	4832500	4840900	4871300	4345500	4667100	1.05	1	1	1.01	0.9	0.97	11	73	71	Carbamidomethylation; TMT10plex; Oxidation (M)	834234	Dystonin OS=Mus musculus OX=10090 GN=Dst PE=1 SV=2
67	1176	B2RQC6	5.64	395.64	12304000	12597000	12019000	12636000	10820000	11637000	0.98	1	0.95	1	0.86	0.92	12304000	12597000	12019000	12636000	10820000	11637000	0.98	1	0.95	1	0.86	0.92	33	64	64	Carbamidomethylation; TMT10plex	243236	CAD protein OS=Mus musculus OX=10090 GN=Cad PE=1 SV=1
68	98	Q9JKF1	3.17	395.33	9029700	8975800	8568200	9027500	8141800	9100800	1.01	1	0.95	1.01	0.91	1.01	9029700	8975800	8568200	9027500	8141800	9100800	1.01	1	0.95	1.01	0.91	1.01	36	57	53	Carbamidomethylation; TMT10plex	188741	Ras GTPase-activating-like protein IQGAP1 OS=Mus musculus OX=10090 GN=Iqgap1 PE=1 SV=2
19	29	P63038	6.82	394.43	57415000	55262000	53883000	56417000	47330000	52409000	1.04	1	0.98	1.02	0.86	0.95	57415000	55262000	53883000	56417000	47330000	52409000	1.04	1	0.98	1.02	0.86	0.95	70	44	44	Carbamidomethylation; TMT10plex; Oxidation (M)	60956	60 kDa heat shock protein mitochondrial OS=Mus musculus OX=10090 GN=Hspd1 PE=1 SV=1
57	24	Q8CAQ8	5.46	393.53	25020000	23330000	25087000	22393000	21625000	22769000	1.07	1	1.08	0.96	0.93	0.98	25020000	23330000	25087000	22393000	21625000	22769000	1.07	1	1.08	0.96	0.93	0.98	58	47	47	Carbamidomethylation; TMT10plex	83900	MICOS complex subunit Mic60 OS=Mus musculus OX=10090 GN=Immt PE=1 SV=1
133	5850	Q922D8	4.55	393.05	17559000	16930000	17403000	17129000	15290000	16491000	1.04	1	1.03	1.01	0.9	0.97	17559000	16930000	17403000	17129000	15290000	16491000	1.04	1	1.03	1.01	0.9	0.97	43	39	39	Carbamidomethylation; TMT10plex	101200	C-1-tetrahydrofolate synthase cytoplasmic OS=Mus musculus OX=10090 GN=Mthfd1 PE=1 SV=4
121	250	P42932	5.76	393.01	17730000	18091000	17825000	18284000	15502000	16601000	0.98	1	0.99	1.01	0.86	0.92	17730000	18091000	17825000	18284000	15502000	16601000	0.98	1	0.99	1.01	0.86	0.92	68	38	38	Carbamidomethylation; TMT10plex	59556	T-complex protein 1 subunit theta OS=Mus musculus OX=10090 GN=Cct8 PE=1 SV=3
78	64	Q8VDD5	9.17	389.09	6941800	6285000	6508700	5599000	7159400	7796900	1.1	1	1.04	0.89	1.14	1.24	6941800	6285000	6508700	5599000	7159400	7796900	1.1	1	1.04	0.89	1.14	1.24	30	62	51	Carbamidomethylation; TMT10plex	226370	Myosin-9 OS=Mus musculus OX=10090 GN=Myh9 PE=1 SV=4
96	444	Q64518	6.85	388.48	5658300	5850300	5578600	5621400	6646500	5646800	0.97	1	0.95	0.96	1.14	0.97	5658300	5850300	5578600	5621400	6646500	5646800	0.97	1	0.95	0.96	1.14	0.97	23	34	23	Carbamidomethylation; TMT10plex	113638	Sarcoplasmic/endoplasmic reticulum calcium ATPase 3 OS=Mus musculus OX=10090 GN=Atp2a3 PE=1 SV=3
100	1811	Q61881	4.05	387.68	15099000	14932000	13413000	14661000	15044000	13835000	1.01	1	0.9	0.98	1.01	0.93	15099000	14932000	13413000	14661000	15044000	13835000	1.01	1	0.9	0.98	1.01	0.93	51	36	36	Carbamidomethylation; TMT10plex	81211	DNA replication licensing factor MCM7 OS=Mus musculus OX=10090 GN=Mcm7 PE=1 SV=1
82	133	P25206	4.85	387.44	11403000	11488000	10285000	10716000	10028000	10612000	0.99	1	0.9	0.93	0.87	0.92	11403000	11488000	10285000	10716000	10028000	10612000	0.99	1	0.9	0.93	0.87	0.92	51	38	38	Carbamidomethylation; TMT10plex; Oxidation (M)	91546	DNA replication licensing factor MCM3 OS=Mus musculus OX=10090 GN=Mcm3 PE=1 SV=2
22	15683	P27773	10.89	387.24	105200000	111800000	91001000	103530000	107470000	115870000	0.94	1	0.81	0.93	0.96	1.04	105200000	111800000	91001000	103530000	107470000	115870000	0.94	1	0.81	0.93	0.96	1.04	68	42	42	Carbamidomethylation; TMT10plex; Oxidation (M)	56678	Protein disulfide-isomerase A3 OS=Mus musculus OX=10090 GN=Pdia3 PE=1 SV=2
56	41	Q62261	4.51	386.31	7715200	7374500	7852200	7993900	8385900	7517600	1.05	1	1.06	1.08	1.14	1.02	7715200	7374500	7852200	7993900	8385900	7517600	1.05	1	1.06	1.08	1.14	1.02	33	70	70	Carbamidomethylation; TMT10plex	274221	Spectrin beta chain non-erythrocytic 1 OS=Mus musculus OX=10090 GN=Sptbn1 PE=1 SV=2
75	26	P48678	11.79	385.5	17165000	17429000	16400000	19163000	19710000	21159000	0.98	1	0.94	1.1	1.13	1.21	17165000	17429000	16400000	19163000	19710000	21159000	0.98	1	0.94	1.1	1.13	1.21	55	44	42	Carbamidomethylation; TMT10plex; Oxidation (M)	74238	Prelamin-A/C OS=Mus musculus OX=10090 GN=Lmna PE=1 SV=2
124	10070	Q7TPR4	6.06	385.27	9727700	9796400	8847800	8483600	8344500	9200300	0.99	1	0.9	0.87	0.85	0.94	9727700	9796400	8847800	8483600	8344500	9200300	0.99	1	0.9	0.87	0.85	0.94	31	37	22	Carbamidomethylation; TMT10plex; Oxidation (M)	103068	Alpha-actinin-1 OS=Mus musculus OX=10090 GN=Actn1 PE=1 SV=1
52	59	Q78PY7	7.12	384.67	19391000	20112000	17970000	21515000	20107000	19280000	0.96	1	0.89	1.07	1	0.96	19391000	20112000	17970000	21515000	20107000	19280000	0.96	1	0.89	1.07	1	0.96	54	46	46	Carbamidomethylation; TMT10plex	102088	Staphylococcal nuclease domain-containing protein 1 OS=Mus musculus OX=10090 GN=Snd1 PE=1 SV=1
104	97	Q60597	5.31	384.04	19327000	18280000	18552000	16894000	16338000	16513000	1.06	1	1.01	0.92	0.89	0.9	19327000	18280000	18552000	16894000	16338000	16513000	1.06	1	1.01	0.92	0.89	0.9	45	43	43	Carbamidomethylation; TMT10plex	116449	2-oxoglutarate dehydrogenase mitochondrial OS=Mus musculus OX=10090 GN=Ogdh PE=1 SV=3
158	5461	Q8BKC5	20.03	383.4	5522700	5826000	5310900	5499200	4862700	7593000	0.95	1	0.91	0.94	0.83	1.3	5522700	5826000	5310900	5499200	4862700	7593000	0.95	1	0.91	0.94	0.83	1.3	32	33	32	Carbamidomethylation; TMT10plex	123591	Importin-5 OS=Mus musculus OX=10090 GN=Ipo5 PE=1 SV=3
111	1098	P97310	6.87	383.19	13969000	13613000	13316000	12297000	11422000	12098000	1.03	1	0.98	0.9	0.84	0.89	13969000	13613000	13316000	12297000	11422000	12098000	1.03	1	0.98	0.9	0.84	0.89	46	36	36	Carbamidomethylation; TMT10plex; Oxidation (M)	102077	DNA replication licensing factor MCM2 OS=Mus musculus OX=10090 GN=Mcm2 PE=1 SV=3
9	19	P09103	8.35	381.91	236510000	231450000	218530000	240260000	211900000	259230000	1.02	1	0.94	1.04	0.92	1.12	236510000	231450000	218530000	240260000	211900000	259230000	1.02	1	0.94	1.04	0.92	1.12	61	39	39	Carbamidomethylation; TMT10plex; Oxidation (M)	57059	Protein disulfide-isomerase OS=Mus musculus OX=10090 GN=P4hb PE=1 SV=2
128	3208	Q8BGQ7	5.2	379.94	12690000	13042000	13557000	12520000	11747000	12909000	0.97	1	1.04	0.96	0.9	0.99	12690000	13042000	13557000	12520000	11747000	12909000	0.97	1	1.04	0.96	0.9	0.99	44	36	36	Carbamidomethylation; TMT10plex	106908	Alanine--tRNA ligase cytoplasmic OS=Mus musculus OX=10090 GN=Aars1 PE=1 SV=1
79	232	Q8CIE6	2.45	376.03	14433000	15238000	14079000	15134000	14303000	13735000	0.95	1	0.92	0.99	0.94	0.9	14433000	15238000	14079000	15134000	14303000	13735000	0.95	1	0.92	0.99	0.94	0.9	43	47	47	Carbamidomethylation; TMT10plex	138432	Coatomer subunit alpha OS=Mus musculus OX=10090 GN=Copa PE=1 SV=2
109	463	Q9WV92	4.73	375.17	8709100	8765900	8666100	8338100	7672300	8670500	0.99	1	0.99	0.95	0.88	0.99	8709100	8765900	8666100	8338100	7672300	8670500	0.99	1	0.99	0.95	0.88	0.99	40	37	35	Carbamidomethylation; TMT10plex	103338	Band 4.1-like protein 3 OS=Mus musculus OX=10090 GN=Epb41l3 PE=1 SV=1
38	124	P16546	1.21	374.54	13288000	13144000	12726000	13142000	13281000	13028000	1.01	1	0.97	1	1.01	0.99	13288000	13144000	12726000	13142000	13281000	13028000	1.01	1	0.97	1	1.01	0.99	37	79	79	Carbamidomethylation; TMT10plex	284596	Spectrin alpha chain non-erythrocytic 1 OS=Mus musculus OX=10090 GN=Sptan1 PE=1 SV=4
21	22	Q03517	56.08	374.19	65402000	49033000	70956000	75980000	94214000	82741000	1.33	1	1.45	1.55	1.92	1.69	65402000	49033000	70956000	75980000	94214000	82741000	1.33	1	1.45	1.55	1.92	1.69	58	38	38	TMT10plex; Oxidation (M)	70644	Secretogranin-2 OS=Mus musculus OX=10090 GN=Scg2 PE=1 SV=1
162	37	O08788	10.88	374.16	3906300	3796100	4075700	3930500	3655600	3201400	1.03	1	1.07	1.04	0.96	0.84	3906300	3796100	4075700	3930500	3655600	3201400	1.03	1	1.07	1.04	0.96	0.84	34	35	35	Carbamidomethylation; TMT10plex	141675	Dynactin subunit 1 OS=Mus musculus OX=10090 GN=Dctn1 PE=1 SV=3
123	137	Q3UPL0	3.29	373.57	33516000	30311000	30897000	33306000	29864000	32644000	1.11	1	1.02	1.1	0.99	1.08	33516000	30311000	30897000	33306000	29864000	32644000	1.11	1	1.02	1.1	0.99	1.08	31	40	40	Carbamidomethylation; TMT10plex	133569	Protein transport protein Sec31A OS=Mus musculus OX=10090 GN=Sec31a PE=1 SV=2
94	331	Q8BI84	1.78	373.19	6597500	6310900	6556200	6645100	6504700	6907300	1.05	1	1.04	1.05	1.03	1.09	6597500	6310900	6556200	6645100	6504700	6907300	1.05	1	1.04	1.05	1.03	1.09	25	48	48	Carbamidomethylation; TMT10plex	213673	Transport and Golgi organization protein 1 homolog OS=Mus musculus OX=10090 GN=Mia3 PE=1 SV=2
86	79	Q61941	6.75	372.41	21847000	21989000	21298000	19536000	18489000	18425000	0.99	1	0.97	0.89	0.84	0.84	21847000	21989000	21298000	19536000	18489000	18425000	0.99	1	0.97	0.89	0.84	0.84	33	42	42	Carbamidomethylation; TMT10plex	113838	NAD(P) transhydrogenase mitochondrial OS=Mus musculus OX=10090 GN=Nnt PE=1 SV=2
62	213	P08003	5.45	372.23	36318000	34535000	32802000	36630000	31424000	37001000	1.05	1	0.95	1.06	0.91	1.07	36318000	34535000	32802000	36630000	31424000	37001000	1.05	1	0.95	1.06	0.91	1.07	51	37	37	Carbamidomethylation; TMT10plex; Oxidation (M)	71982	Protein disulfide-isomerase A4 OS=Mus musculus OX=10090 GN=Pdia4 PE=1 SV=3
138	120	Q8BMS1	8.22	372.02	15339000	16037000	15665000	15800000	13138000	13924000	0.96	1	0.98	0.99	0.82	0.87	15339000	16037000	15665000	15800000	13138000	13924000	0.96	1	0.98	0.99	0.82	0.87	44	33	33	Carbamidomethylation; TMT10plex; Oxidation (M)	82670	Trifunctional enzyme subunit alpha mitochondrial OS=Mus musculus OX=10090 GN=Hadha PE=1 SV=1
43	25	P09405	13.83	371.03	43900000	40931000	50891000	50189000	54312000	53052000	1.07	1	1.24	1.23	1.33	1.3	43900000	40931000	50891000	50189000	54312000	53052000	1.07	1	1.24	1.23	1.33	1.3	50	46	46	Carbamidomethylation; TMT10plex	76723	Nucleolin OS=Mus musculus OX=10090 GN=Ncl PE=1 SV=2
143	317	P49717	1.82	370.52	10834000	10659000	10186000	10611000	10362000	10669000	1.02	1	0.96	1	0.97	1	10834000	10659000	10186000	10611000	10362000	10669000	1.02	1	0.96	1	0.97	1	38	35	35	Carbamidomethylation; TMT10plex; Oxidation (M)	96736	DNA replication licensing factor MCM4 OS=Mus musculus OX=10090 GN=Mcm4 PE=1 SV=1
39	600	P08249	11.62	366.88	56772000	49598000	55453000	53152000	44911000	44112000	1.14	1	1.12	1.07	0.91	0.89	56772000	49598000	55453000	53152000	44911000	44112000	1.14	1	1.12	1.07	0.91	0.89	65	23	23	Carbamidomethylation; TMT10plex; Oxidation (M)	35611	Malate dehydrogenase mitochondrial OS=Mus musculus OX=10090 GN=Mdh2 PE=1 SV=3
12	100	P16858	2.47	366.83	97004000	96436000	97295000	98422000	90897000	92492000	1.01	1	1.01	1.02	0.94	0.96	97004000	96436000	97295000	98422000	90897000	92492000	1.01	1	1.01	1.02	0.94	0.96	69	23	23	Carbamidomethylation; TMT10plex; Oxidation (M)	35810	Glyceraldehyde-3-phosphate dehydrogenase OS=Mus musculus OX=10090 GN=Gapdh PE=1 SV=2
185	426	Q6GQT9	7.83	366.79	6258200	5839800	5811900	5723500	4816500	5033200	1.07	1	1	0.98	0.82	0.86	6258200	5839800	5811900	5723500	4816500	5033200	1.07	1	1	0.98	0.82	0.86	28	29	29	Carbamidomethylation; TMT10plex	133420	Nodal modulator 1 OS=Mus musculus OX=10090 GN=Nomo1 PE=1 SV=1
90	200	Q3U7R1	3.69	365.79	37793000	36610000	37976000	34014000	35320000	35112000	1.03	1	1.04	0.93	0.96	0.96	37793000	36610000	37976000	34014000	35320000	35112000	1.03	1	1.04	0.93	0.96	0.96	47	46	46	Carbamidomethylation; TMT10plex	121553	Extended synaptotagmin-1 OS=Mus musculus OX=10090 GN=Esyt1 PE=1 SV=2
42	77	P17183	26.15	365.24	17093000	18289000	22101000	19860000	15786000	14514000	0.93	1	1.21	1.09	0.86	0.79	17093000	18289000	22101000	19860000	15786000	14514000	0.93	1	1.21	1.09	0.86	0.79	43	19	13	Carbamidomethylation; TMT10plex; Oxidation (M)	47297	Gamma-enolase OS=Mus musculus OX=10090 GN=Eno2 PE=1 SV=2
102	626	E9PVA8	8.89	364.61	9325400	8602500	10048000	8935500	8141100	8434800	1.08	1	1.17	1.04	0.95	0.98	9325400	8602500	10048000	8935500	8141100	8434800	1.08	1	1.17	1.04	0.95	0.98	23	54	54	Carbamidomethylation; TMT10plex	293018	eIF-2-alpha kinase activator GCN1 OS=Mus musculus OX=10090 GN=Gcn1 PE=1 SV=1
84	371	Q07113	5.8	363.49	15617000	17124000	17989000	15402000	16916000	17449000	0.91	1	1.05	0.9	0.99	1.02	15617000	17124000	17989000	15402000	16916000	17449000	0.91	1	1.05	0.9	0.99	1.02	22	48	48	Carbamidomethylation; TMT10plex	273814	Cation-independent mannose-6-phosphate receptor OS=Mus musculus OX=10090 GN=Igf2r PE=1 SV=1
122	294	P48722	4.16	363.01	6543600	6058100	6316600	6072600	5597300	6385800	1.08	1	1.04	1	0.92	1.05	6543600	6058100	6316600	6072600	5597300	6385800	1.08	1	1.04	1	0.92	1.05	46	40	37	Carbamidomethylation; TMT10plex	94382	Heat shock 70 kDa protein 4L OS=Mus musculus OX=10090 GN=Hspa4l PE=1 SV=2
69	228	P17156	2.75	362.83	4319000	4250400	4065700	3977800	4077000	3818300	1.02	1	0.96	0.94	0.96	0.9	4319000	4250400	4065700	3977800	4077000	3818300	1.02	1	0.96	0.94	0.96	0.9	31	33	17	Carbamidomethylation; TMT10plex	69642	Heat shock-related 70 kDa protein 2 OS=Mus musculus OX=10090 GN=Hspa2 PE=1 SV=2
17	128	P68369	12.4	362.36	10992	15948	0	19261	0	0	0.69	1	0	1.21	0	0	10992	15948	0	19261	0	0	0.69	1	0	1.21	0	0	3	25	1	TMT10plex	50136	Tubulin alpha-1A chain OS=Mus musculus OX=10090 GN=Tuba1a PE=1 SV=1
355	2388	P26231	7.05	361.77	2918800	2829800	2927700	2777800	2448200	2599500	1.03	1	1.03	0.98	0.87	0.92	2918800	2829800	2927700	2777800	2448200	2599500	1.03	1	1.03	0.98	0.87	0.92	28	27	20	Carbamidomethylation; TMT10plex	100106	Catenin alpha-1 OS=Mus musculus OX=10090 GN=Ctnna1 PE=1 SV=1
190	618	Q9JIF7	1.57	361.74	10222000	9815900	9749800	10093000	9577600	10293000	1.04	1	0.99	1.03	0.98	1.05	10222000	9815900	9749800	10093000	9577600	10293000	1.04	1	0.99	1.03	0.98	1.05	40	37	37	Carbamidomethylation; TMT10plex	107066	Coatomer subunit beta OS=Mus musculus OX=10090 GN=Copb1 PE=1 SV=1
97	20	Q64521	9.35	361.59	14444000	13190000	12655000	11813000	13841000	11125000	1.1	1	0.96	0.9	1.05	0.84	14444000	13190000	12655000	11813000	13841000	11125000	1.1	1	0.96	0.9	1.05	0.84	56	40	40	Carbamidomethylation; TMT10plex; Oxidation (M)	80954	Glycerol-3-phosphate dehydrogenase mitochondrial OS=Mus musculus OX=10090 GN=Gpd2 PE=1 SV=2
91	204	Q8BHN3	6.35	361.58	23866000	21765000	23012000	21735000	25693000	22867000	1.1	1	1.06	1	1.18	1.05	23866000	21765000	23012000	21735000	25693000	22867000	1.1	1	1.06	1	1.18	1.05	43	37	37	Carbamidomethylation; TMT10plex; Oxidation (M)	106911	Neutral alpha-glucosidase AB OS=Mus musculus OX=10090 GN=Ganab PE=1 SV=1
126	40	Q8BL66	4.36	361.49	4278500	4270400	4210100	4303000	3767600	4384800	1	1	0.99	1.01	0.88	1.03	4278500	4270400	4210100	4303000	3767600	4384800	1	1	0.99	1.01	0.88	1.03	37	46	46	Carbamidomethylation; TMT10plex	160914	Early endosome antigen 1 OS=Mus musculus OX=10090 GN=Eea1 PE=1 SV=2
95	933	P20357	4.77	361.37	8934300	8588200	9529100	9821800	9622400	9935300	1.04	1	1.11	1.14	1.12	1.16	8934300	8588200	9529100	9821800	9622400	9935300	1.04	1	1.11	1.14	1.12	1.16	31	48	48	Carbamidomethylation; TMT10plex	199130	Microtubule-associated protein 2 OS=Mus musculus OX=10090 GN=Map2 PE=1 SV=2
40	321	P09411	10.96	361.3	62480000	55987000	68967000	65331000	56901000	54107000	1.12	1	1.23	1.17	1.02	0.97	62480000	55987000	68967000	65331000	56901000	54107000	1.12	1	1.23	1.17	1.02	0.97	59	29	24	Carbamidomethylation; TMT10plex; Oxidation (M)	44550	Phosphoglycerate kinase 1 OS=Mus musculus OX=10090 GN=Pgk1 PE=1 SV=4
142	184	P50396	3.73	360.31	11839000	11768000	12111000	10839000	11457000	10970000	1.01	1	1.03	0.92	0.97	0.93	11839000	11768000	12111000	10839000	11457000	10970000	1.01	1	1.03	0.92	0.97	0.93	50	30	22	Carbamidomethylation; TMT10plex; Oxidation (M)	50522	Rab GDP dissociation inhibitor alpha OS=Mus musculus OX=10090 GN=Gdi1 PE=1 SV=3
66	1	P97311	1.9	359.73	15771000	15657000	15204000	15224000	15027000	14616000	1.01	1	0.97	0.97	0.96	0.93	15771000	15657000	15204000	15224000	15027000	14616000	1.01	1	0.97	0.97	0.96	0.93	46	41	41	Carbamidomethylation; TMT10plex	92867	DNA replication licensing factor MCM6 OS=Mus musculus OX=10090 GN=Mcm6 PE=1 SV=1
174	122	E9Q394	2.91	359.05	3301400	3512300	3206100	3346600	3225800	3356400	0.94	1	0.91	0.95	0.92	0.96	3301400	3512300	3206100	3346600	3225800	3356400	0.94	1	0.91	0.95	0.92	0.96	20	42	42	Carbamidomethylation; TMT10plex	303974	A-kinase anchor protein 13 OS=Mus musculus OX=10090 GN=Akap13 PE=1 SV=1
65	106	Q61316	3.44	358.96	20348000	20406000	20507000	20213000	18683000	21297000	1	1	1	0.99	0.92	1.04	20348000	20406000	20507000	20213000	18683000	21297000	1	1	1	0.99	0.92	1.04	55	44	41	Carbamidomethylation; TMT10plex; Oxidation (M)	94133	Heat shock 70 kDa protein 4 OS=Mus musculus OX=10090 GN=Hspa4 PE=1 SV=1
112	237	Q6ZQ38	5.43	358.61	14828000	15225000	14793000	14742000	13133000	13751000	0.97	1	0.97	0.97	0.86	0.9	14828000	15225000	14793000	14742000	13133000	13751000	0.97	1	0.97	0.97	0.86	0.9	36	44	43	Carbamidomethylation; TMT10plex	136331	Cullin-associated NEDD8-dissociated protein 1 OS=Mus musculus OX=10090 GN=Cand1 PE=1 SV=2
135	31	P06745	2.85	357.46	24402000	26098000	23863000	24924000	25971000	25082000	0.94	1	0.91	0.95	1	0.96	24402000	26098000	23863000	24924000	25971000	25082000	0.94	1	0.91	0.95	1	0.96	46	30	30	Carbamidomethylation; TMT10plex; Oxidation (M)	62767	Glucose-6-phosphate isomerase OS=Mus musculus OX=10090 GN=Gpi PE=1 SV=4
20	292	P68372	1.78	357.05	52430	47758	59038	54468	33236	48952	1.1	1	1.24	1.14	0.7	1.02	52430	47758	59038	54468	33236	48952	1.1	1	1.24	1.14	0.7	1.02	3	26	1	TMT10plex	49831	Tubulin beta-4B chain OS=Mus musculus OX=10090 GN=Tubb4b PE=1 SV=1
108	35	Q00493	8.1	356.61	39010000	36197000	39340000	43131000	44089000	37551000	1.08	1	1.09	1.19	1.22	1.04	39010000	36197000	39340000	43131000	44089000	37551000	1.08	1	1.09	1.19	1.22	1.04	53	27	27	Carbamidomethylation; TMT10plex; Oxidation (M)	53256	Carboxypeptidase E OS=Mus musculus OX=10090 GN=Cpe PE=1 SV=2
25	129	P68373	22.2	356.36	0	4631.1	8551.5	1696.1	0	2856.6	0	1	1.85	0.37	0	0.62	0	4631.1	8551.5	1696.1	0	2856.6	0	1	1.85	0.37	0	0.62	5	24	1	Carbamidomethylation; TMT10plex; Oxidation (M)	49909	Tubulin alpha-1C chain OS=Mus musculus OX=10090 GN=Tuba1c PE=1 SV=1
85	12	Q60864	18.01	356.19	37349000	35344000	39898000	42486000	45154000	50911000	1.06	1	1.13	1.2	1.28	1.44	37349000	35344000	39898000	42486000	45154000	50911000	1.06	1	1.13	1.2	1.28	1.44	58	39	39	Carbamidomethylation; TMT10plex; Oxidation (M)	62582	Stress-induced-phosphoprotein 1 OS=Mus musculus OX=10090 GN=Stip1 PE=1 SV=1
150	156	Q9CW03	5.45	354.85	3220400	3425600	3348500	3118100	2953300	3154600	0.94	1	0.98	0.91	0.86	0.92	3220400	3425600	3348500	3118100	2953300	3154600	0.94	1	0.98	0.91	0.86	0.92	33	41	41	Carbamidomethylation; TMT10plex	141555	Structural maintenance of chromosomes protein 3 OS=Mus musculus OX=10090 GN=Smc3 PE=1 SV=2
226	3586	O88844	4.84	354.74	7447700	7048300	7381700	7048000	6445100	6723300	1.06	1	1.05	1	0.91	0.95	7447700	7048300	7381700	7048000	6445100	6723300	1.06	1	1.05	1	0.91	0.95	56	27	26	Carbamidomethylation; TMT10plex	46674	Isocitrate dehydrogenase [NADP] cytoplasmic OS=Mus musculus OX=10090 GN=Idh1 PE=1 SV=2
33	21	P05064	6.8	354.63	64177000	60164000	69487000	66231000	65879000	58370000	1.07	1	1.15	1.1	1.09	0.97	64177000	60164000	69487000	66231000	65879000	58370000	1.07	1	1.15	1.1	1.09	0.97	62	29	25	Carbamidomethylation; TMT10plex; Oxidation (M)	39356	Fructose-bisphosphate aldolase A OS=Mus musculus OX=10090 GN=Aldoa PE=1 SV=2
197	911	P11983	6	354.15	17103000	16107000	17273000	16412000	14730000	16344000	1.06	1	1.07	1.02	0.91	1.01	17103000	16107000	17273000	16412000	14730000	16344000	1.06	1	1.07	1.02	0.91	1.01	47	24	24	Carbamidomethylation; TMT10plex; Oxidation (M)	60449	T-complex protein 1 subunit alpha OS=Mus musculus OX=10090 GN=Tcp1 PE=1 SV=3
41	343	Q60932	10.53	354.1	10943000	9859700	9698500	10228000	8879700	8249700	1.11	1	0.98	1.04	0.9	0.84	10943000	9859700	9698500	10228000	8879700	8249700	1.11	1	0.98	1.04	0.9	0.84	73	20	19	Carbamidomethylation; TMT10plex	32351	Voltage-dependent anion-selective channel protein 1 OS=Mus musculus OX=10090 GN=Vdac1 PE=1 SV=3
115	1311	Q6P4T2	3.66	354.04	8711800	8931200	8728000	8301500	8004800	7927100	0.98	1	0.98	0.93	0.9	0.89	8711800	8931200	8728000	8301500	8004800	7927100	0.98	1	0.98	0.93	0.9	0.89	25	48	48	Carbamidomethylation; TMT10plex	244544	U5 small nuclear ribonucleoprotein 200 kDa helicase OS=Mus musculus OX=10090 GN=Snrnp200 PE=1 SV=1
92	193	Q91VD9	8.94	353.17	17748000	17056000	17803000	16588000	16470000	14413000	1.04	1	1.04	0.97	0.97	0.85	17748000	17056000	17803000	16588000	16470000	14413000	1.04	1	1.04	0.97	0.97	0.85	55	38	38	Carbamidomethylation; TMT10plex; Oxidation (M)	79777	NADH-ubiquinone oxidoreductase 75 kDa subunit mitochondrial OS=Mus musculus OX=10090 GN=Ndufs1 PE=1 SV=2
88	760	P54071	7.61	352.37	39884000	39396000	38631000	38002000	37752000	33021000	1.01	1	0.98	0.96	0.96	0.84	39884000	39396000	38631000	38002000	37752000	33021000	1.01	1	0.98	0.96	0.96	0.84	58	29	28	Carbamidomethylation; TMT10plex; Oxidation (M)	50906	Isocitrate dehydrogenase [NADP] mitochondrial OS=Mus musculus OX=10090 GN=Idh2 PE=1 SV=3
98	15	P46460	3.78	352.06	14176000	14362000	14481000	14262000	12943000	13668000	0.99	1	1.01	0.99	0.9	0.95	14176000	14362000	14481000	14262000	12943000	13668000	0.99	1	1.01	0.99	0.9	0.95	51	42	41	Carbamidomethylation; TMT10plex	82613	Vesicle-fusing ATPase OS=Mus musculus OX=10090 GN=Nsf PE=1 SV=2
131	1014	Q8BW75	12.38	351	16075000	13021000	13878000	13683000	10708000	14073000	1.23	1	1.07	1.05	0.82	1.08	16075000	13021000	13878000	13683000	10708000	14073000	1.23	1	1.07	1.05	0.82	1.08	47	23	20	Carbamidomethylation; TMT10plex; Oxidation (M)	58558	Amine oxidase [flavin-containing] B OS=Mus musculus OX=10090 GN=Maob PE=1 SV=4
177	72	Q6NSW3	5.67	350.45	4013100	4237600	4202900	3958500	3728500	3607500	0.95	1	0.99	0.93	0.88	0.85	4013100	4237600	4202900	3958500	3728500	3607500	0.95	1	0.99	0.93	0.88	0.85	27	35	35	Carbamidomethylation; TMT10plex	185093	A-kinase anchor protein SPHKAP OS=Mus musculus OX=10090 GN=Sphkap PE=1 SV=2
257	2412	Q91VI7	2.93	350.38	6833500	6826400	6363900	6630700	6307800	6050600	1	1	0.93	0.97	0.92	0.89	6833500	6826400	6363900	6630700	6307800	6050600	1	1	0.93	0.97	0.92	0.89	76	26	26	Carbamidomethylation; TMT10plex; Oxidation (M)	49817	Ribonuclease inhibitor OS=Mus musculus OX=10090 GN=Rnh1 PE=1 SV=1
119	2709	Q9Z1Q9	5.59	349.85	11869000	11535000	12164000	11241000	13416000	10965000	1.03	1	1.05	0.97	1.16	0.95	11869000	11535000	12164000	11241000	13416000	10965000	1.03	1	1.05	0.97	1.16	0.95	32	40	40	Carbamidomethylation; TMT10plex	140215	Valine--tRNA ligase OS=Mus musculus OX=10090 GN=Vars1 PE=1 SV=1
224	1638	P80560	12.63	349.8	5544300	5757000	6423000	6246700	7515200	5501800	0.96	1	1.12	1.09	1.31	0.96	5544300	5757000	6423000	6246700	7515200	5501800	0.96	1	1.12	1.09	1.31	0.96	36	31	31	Carbamidomethylation; TMT10plex	111497	Receptor-type tyrosine-protein phosphatase N2 OS=Mus musculus OX=10090 GN=Ptprn2 PE=1 SV=2
61	341	P23116	1.68	349.51	21331000	20805000	21277000	21088000	22037000	21124000	1.03	1	1.02	1.01	1.06	1.02	21331000	20805000	21277000	21088000	22037000	21124000	1.03	1	1.02	1.01	1.06	1.02	37	56	56	Carbamidomethylation; TMT10plex	161936	Eukaryotic translation initiation factor 3 subunit A OS=Mus musculus OX=10090 GN=Eif3a PE=1 SV=5
36	1126	P68368	3.79	349.36	2139600	2215800	2339500	2334400	2479200	2355500	0.97	1	1.06	1.05	1.12	1.06	2139600	2215800	2339500	2334400	2479200	2355500	0.97	1	1.06	1.05	1.12	1.06	12	23	4	Carbamidomethylation; TMT10plex	49924	Tubulin alpha-4A chain OS=Mus musculus OX=10090 GN=Tuba4a PE=1 SV=1
161	635	Q8K411	6.39	348.8	17653000	17906000	15681000	15621000	15459000	14688000	0.99	1	0.88	0.87	0.86	0.82	17653000	17906000	15681000	15621000	15459000	14688000	0.99	1	0.88	0.87	0.86	0.82	36	34	34	Carbamidomethylation; TMT10plex	117372	Presequence protease mitochondrial OS=Mus musculus OX=10090 GN=Pitrm1 PE=1 SV=1
63	282	P50516	3.59	348.8	30966000	29914000	31383000	28328000	31017000	28180000	1.04	1	1.05	0.95	1.04	0.94	30966000	29914000	31383000	28328000	31017000	28180000	1.04	1	1.05	0.95	1.04	0.94	55	35	35	Carbamidomethylation; TMT10plex; Oxidation (M)	68326	V-type proton ATPase catalytic subunit A OS=Mus musculus OX=10090 GN=Atp6v1a PE=1 SV=2
144	246	A2AGT5	7	348.8	6201100	6338900	5850700	5790300	5305900	5879500	0.98	1	0.92	0.91	0.84	0.93	6201100	6338900	5850700	5790300	5305900	5879500	0.98	1	0.92	0.91	0.84	0.93	26	48	48	Carbamidomethylation; TMT10plex	225633	Cytoskeleton-associated protein 5 OS=Mus musculus OX=10090 GN=Ckap5 PE=1 SV=1
285	1125	P27546	7.11	347.84	3393800	3304600	3140800	3760000	3441700	3705400	1.03	1	0.95	1.14	1.04	1.12	3393800	3304600	3140800	3760000	3441700	3705400	1.03	1	0.95	1.14	1.04	1.12	35	32	32	Carbamidomethylation; TMT10plex	117429	Microtubule-associated protein 4 OS=Mus musculus OX=10090 GN=Map4 PE=1 SV=3
202	2174	Q8BH59	4.18	347.68	5998500	6013300	5781700	6314100	5326400	5724100	1	1	0.96	1.05	0.89	0.95	5998500	6013300	5781700	6314100	5326400	5724100	1	1	0.96	1.05	0.89	0.95	42	26	21	Carbamidomethylation; TMT10plex; Oxidation (M)	74570	Calcium-binding mitochondrial carrier protein Aralar1 OS=Mus musculus OX=10090 GN=Slc25a12 PE=1 SV=1
129	1203	P80315	4.93	346.83	9185200	9866700	9541400	8836900	8598700	8891600	0.93	1	0.97	0.9	0.87	0.9	9185200	9866700	9541400	8836900	8598700	8891600	0.93	1	0.97	0.9	0.87	0.9	49	26	26	Carbamidomethylation; TMT10plex; Oxidation (M)	58066	T-complex protein 1 subunit delta OS=Mus musculus OX=10090 GN=Cct4 PE=1 SV=3
160	1701	P17426	10.09	346.72	2820100	3131700	2870500	2659600	2489400	2608900	0.9	1	0.92	0.85	0.79	0.83	2820100	3131700	2870500	2659600	2489400	2608900	0.9	1	0.92	0.85	0.79	0.83	28	33	24	Carbamidomethylation; TMT10plex; Oxidation (M)	107664	AP-2 complex subunit alpha-1 OS=Mus musculus OX=10090 GN=Ap2a1 PE=1 SV=1
26	15686	Q7TMM9	3.58	346.48	28453	25334	38601	42029	13872	41290	1.12	1	1.52	1.66	0.55	1.63	28453	25334	38601	42029	13872	41290	1.12	1	1.52	1.66	0.55	1.63	3	26	1	TMT10plex	49907	Tubulin beta-2A chain OS=Mus musculus OX=10090 GN=Tubb2a PE=1 SV=1
73	168	P70699	4.18	346.46	28882000	29979000	28648000	26554000	29330000	29361000	0.96	1	0.96	0.89	0.98	0.98	28882000	29979000	28648000	26554000	29330000	29361000	0.96	1	0.96	0.89	0.98	0.98	35	27	27	Carbamidomethylation; TMT10plex; Oxidation (M)	106248	Lysosomal alpha-glucosidase OS=Mus musculus OX=10090 GN=Gaa PE=1 SV=2
13	15685	P99024	7.06	345.69	1122800	1159300	1212800	1058800	1176700	1014100	0.97	1	1.05	0.91	1.02	0.87	1122800	1159300	1212800	1058800	1176700	1014100	0.97	1	1.05	0.91	1.02	0.87	10	25	3	TMT10plex; Oxidation (M)	49671	Tubulin beta-5 chain OS=Mus musculus OX=10090 GN=Tubb5 PE=1 SV=1
141	27	Q99PV0	8.13	345.37	5020800	5047200	4757000	4583100	5797100	4735700	0.99	1	0.94	0.91	1.15	0.94	5020800	5047200	4757000	4583100	5797100	4735700	0.99	1	0.94	0.91	1.15	0.94	21	47	47	Carbamidomethylation; TMT10plex	273615	Pre-mRNA-processing-splicing factor 8 OS=Mus musculus OX=10090 GN=Prpf8 PE=1 SV=2
171	342	P80316	5.42	345.19	20790000	21349000	21016000	19853000	18416000	20419000	0.97	1	0.98	0.93	0.86	0.96	20790000	21349000	21016000	19853000	18416000	20419000	0.97	1	0.98	0.93	0.86	0.96	46	27	27	Carbamidomethylation; TMT10plex	59624	T-complex protein 1 subunit epsilon OS=Mus musculus OX=10090 GN=Cct5 PE=1 SV=1
168	1548	Q8QZT1	7.16	344.42	21210000	20345000	21738000	20267000	20489000	18142000	1.04	1	1.07	1	1.01	0.89	21210000	20345000	21738000	20267000	20489000	18142000	1.04	1	1.07	1	1.01	0.89	51	21	21	Carbamidomethylation; TMT10plex; Oxidation (M)	44816	Acetyl-CoA acetyltransferase mitochondrial OS=Mus musculus OX=10090 GN=Acat1 PE=1 SV=1
113	68	P49718	4.52	343.41	17269000	18563000	16727000	17318000	16321000	17414000	0.93	1	0.9	0.93	0.88	0.94	17269000	18563000	16727000	17318000	16321000	17414000	0.93	1	0.9	0.93	0.88	0.94	53	40	40	Carbamidomethylation; TMT10plex	82407	DNA replication licensing factor MCM5 OS=Mus musculus OX=10090 GN=Mcm5 PE=1 SV=2
27	94	Q9CWF2	11.45	343.15	2500	2370.5	4558.3	0	0	0	1.05	1	1.92	0	0	0	2500	2370.5	4558.3	0	0	0	1.05	1	1.92	0	0	0	3	26	1	TMT10plex	49953	Tubulin beta-2B chain OS=Mus musculus OX=10090 GN=Tubb2b PE=1 SV=1
137	4159	Q61656	7.05	342.53	8540300	8816500	9480500	8920700	8070100	7927200	0.97	1	1.08	1.01	0.92	0.9	8540300	8816500	9480500	8920700	8070100	7927200	0.97	1	1.08	1.01	0.92	0.9	34	36	26	Carbamidomethylation; TMT10plex	69290	Probable ATP-dependent RNA helicase DDX5 OS=Mus musculus OX=10090 GN=Ddx5 PE=1 SV=2
187	303	Q3V3R1	2.55	342.33	4434500	4351600	4184000	4117900	4166900	4540000	1.02	1	0.96	0.95	0.96	1.04	4434500	4351600	4184000	4117900	4166900	4540000	1.02	1	0.96	0.95	0.96	1.04	36	32	32	Carbamidomethylation; TMT10plex	105729	Monofunctional C1-tetrahydrofolate synthase mitochondrial OS=Mus musculus OX=10090 GN=Mthfd1l PE=1 SV=2
130	49	Q11011	3.42	342.09	20574000	20144000	20993000	19622000	20072000	18927000	1.02	1	1.04	0.97	1	0.94	20574000	20144000	20993000	19622000	20072000	18927000	1.02	1	1.04	0.97	1	0.94	41	37	37	Carbamidomethylation; TMT10plex	103325	Puromycin-sensitive aminopeptidase OS=Mus musculus OX=10090 GN=Npepps PE=1 SV=2
360	15688	Q9CPV4	3.77	342.01	9412500	9165700	9884300	9648500	10253000	9496100	1.03	1	1.08	1.05	1.12	1.04	9412500	9165700	9884300	9648500	10253000	9496100	1.03	1	1.08	1.05	1.12	1.04	64	19	19	Carbamidomethylation; TMT10plex	33317	Glyoxalase domain-containing protein 4 OS=Mus musculus OX=10090 GN=Glod4 PE=1 SV=1
76	163	O08553	9.31	341.61	22054000	24727000	19952000	23824000	19900000	23976000	0.89	1	0.81	0.96	0.8	0.97	22054000	24727000	19952000	23824000	19900000	23976000	0.89	1	0.81	0.96	0.8	0.97	46	25	20	Carbamidomethylation; TMT10plex; Oxidation (M)	62278	Dihydropyrimidinase-related protein 2 OS=Mus musculus OX=10090 GN=Dpysl2 PE=1 SV=2
193	413	Q9QUR6	6.21	341.31	6844500	7342900	6774700	6925600	7975400	6543500	0.93	1	0.92	0.94	1.09	0.89	6844500	7342900	6774700	6925600	7975400	6543500	0.93	1	0.92	0.94	1.09	0.89	53	30	30	Carbamidomethylation; TMT10plex	80752	Prolyl endopeptidase OS=Mus musculus OX=10090 GN=Prep PE=1 SV=1
136	912	Q9DBG3	10.63	340.44	2996300	2936000	3166500	3168100	2496600	2852200	1.02	1	1.08	1.08	0.85	0.97	2996300	2936000	3166500	3168100	2496600	2852200	1.02	1	1.08	1.08	0.85	0.97	21	37	17	Carbamidomethylation; TMT10plex	104583	AP-2 complex subunit beta OS=Mus musculus OX=10090 GN=Ap2b1 PE=1 SV=1
251	5011	Q3UGY8	7.78	340.4	1819800	1983900	1966800	1608200	1662400	1660200	0.92	1	0.99	0.81	0.84	0.84	1819800	1983900	1966800	1608200	1662400	1660200	0.92	1	0.99	0.81	0.84	0.84	21	35	35	Carbamidomethylation; TMT10plex	240088	Brefeldin A-inhibited guanine nucleotide-exchange protein 3 OS=Mus musculus OX=10090 GN=Arfgef3 PE=1 SV=1
54	101	P63101	8.68	340.2	12153000	11398000	11783000	13346000	9955800	12910000	1.07	1	1.03	1.17	0.87	1.13	12153000	11398000	11783000	13346000	9955800	12910000	1.07	1	1.03	1.17	0.87	1.13	64	21	16	Carbamidomethylation; TMT10plex; Oxidation (M); Acetylation (Protein N-term)	27771	14-3-3 protein zeta/delta OS=Mus musculus OX=10090 GN=Ywhaz PE=1 SV=1
147	787	P80314	4.8	339.85	22609000	24388000	21314000	22099000	21968000	21041000	0.93	1	0.87	0.91	0.9	0.86	22609000	24388000	21314000	22099000	21968000	21041000	0.93	1	0.87	0.91	0.9	0.86	59	29	29	Carbamidomethylation; TMT10plex; Oxidation (M)	57477	T-complex protein 1 subunit beta OS=Mus musculus OX=10090 GN=Cct2 PE=1 SV=4
321	195	Q8BTI8	7.26	339.66	2332200	2591800	2411700	2300000	2159200	2527200	0.9	1	0.93	0.89	0.83	0.98	2332200	2591800	2411700	2300000	2159200	2527200	0.9	1	0.93	0.89	0.83	0.98	14	31	31	Carbamidomethylation; TMT10plex	294841	Serine/arginine repetitive matrix protein 2 OS=Mus musculus OX=10090 GN=Srrm2 PE=1 SV=3
282	1662	Q6PDI5	9.35	339.55	2938100	2922700	2741900	2557300	2350500	2646500	1.01	1	0.94	0.87	0.8	0.91	2938100	2922700	2741900	2557300	2350500	2646500	1.01	1	0.94	0.87	0.8	0.91	23	32	32	Carbamidomethylation; TMT10plex	203702	Proteasome adapter and scaffold protein ECM29 OS=Mus musculus OX=10090 GN=Ecpas PE=1 SV=3
51	110	P35564	26.45	339.41	68242000	63836000	63917000	62601000	97480000	65935000	1.07	1	1	0.98	1.53	1.03	68242000	63836000	63917000	62601000	97480000	65935000	1.07	1	1	0.98	1.53	1.03	44	33	33	Carbamidomethylation; TMT10plex; Oxidation (M)	67278	Calnexin OS=Mus musculus OX=10090 GN=Canx PE=1 SV=1
154	1050	Q62351	21.81	339.14	14211000	13129000	13860000	10055000	9510100	10664000	1.08	1	1.06	0.77	0.72	0.81	14211000	13129000	13860000	10055000	9510100	10664000	1.08	1	1.06	0.77	0.72	0.81	43	31	31	Carbamidomethylation; TMT10plex; Oxidation (M)	85731	Transferrin receptor protein 1 OS=Mus musculus OX=10090 GN=Tfrc PE=1 SV=1
211	1367	Q8VIJ6	2.12	339.03	12324000	13104000	12794000	12367000	12366000	11928000	0.94	1	0.98	0.94	0.94	0.91	12324000	13104000	12794000	12367000	12366000	11928000	0.94	1	0.98	0.94	0.94	0.91	36	25	24	TMT10plex; Oxidation (M)	75442	Splicing factor proline- and glutamine-rich OS=Mus musculus OX=10090 GN=Sfpq PE=1 SV=1
32	1363	P56480	12.4	338.53	38609000	36424000	37817000	35128000	29063000	30879000	1.06	1	1.04	0.96	0.8	0.85	38609000	36424000	37817000	35128000	29063000	30879000	1.06	1	1.04	0.96	0.8	0.85	57	23	23	TMT10plex; Oxidation (M)	56301	ATP synthase subunit beta mitochondrial OS=Mus musculus OX=10090 GN=Atp5f1b PE=1 SV=2
204	2315	Q91WD9	2.14	338.25	16201000	16610000	16222000	16525000	16665000	17408000	0.98	1	0.98	0.99	1	1.05	16201000	16610000	16222000	16525000	16665000	17408000	0.98	1	0.98	0.99	1	1.05	73	22	22	Carbamidomethylation; TMT10plex; Oxidation (M)	32146	Secretagogin OS=Mus musculus OX=10090 GN=Scgn PE=2 SV=1
101	757	P62814	4.88	338.11	8327000	8743500	8574300	7950200	7636600	7480700	0.95	1	0.98	0.91	0.87	0.86	8327000	8743500	8574300	7950200	7636600	7480700	0.95	1	0.98	0.91	0.87	0.86	57	26	26	Carbamidomethylation; TMT10plex; Oxidation (M)	56551	V-type proton ATPase subunit B brain isoform OS=Mus musculus OX=10090 GN=Atp6v1b2 PE=1 SV=1
180	2239	O08810	6.58	337.05	5212300	5262600	5167100	5220800	5876200	4492900	0.99	1	0.98	0.99	1.12	0.85	5212300	5262600	5167100	5220800	5876200	4492900	0.99	1	0.98	0.99	1.12	0.85	40	35	34	Carbamidomethylation; TMT10plex; Oxidation (M)	109361	116 kDa U5 small nuclear ribonucleoprotein component OS=Mus musculus OX=10090 GN=Eftud2 PE=1 SV=1
213	547	Q6ZPJ3	3.83	336.5	3747400	3847000	4015800	3585100	3644800	3686900	0.97	1	1.04	0.93	0.95	0.96	3747400	3847000	4015800	3585100	3644800	3686900	0.97	1	1.04	0.93	0.95	0.96	25	28	28	Carbamidomethylation; TMT10plex	140834	(E3-independent) E2 ubiquitin-conjugating enzyme UBE2O OS=Mus musculus OX=10090 GN=Ube2o PE=1 SV=3
165	283	P80313	7.75	336.36	14020000	13160000	13391000	12198000	11061000	13161000	1.07	1	1.02	0.93	0.84	1	14020000	13160000	13391000	12198000	11061000	13161000	1.07	1	1.02	0.93	0.84	1	56	32	32	Carbamidomethylation; TMT10plex; Oxidation (M); Acetylation (Protein N-term)	59652	T-complex protein 1 subunit eta OS=Mus musculus OX=10090 GN=Cct7 PE=1 SV=1
156	108	F6ZDS4	3.18	335.84	5933800	5299800	5703500	5390200	5194600	5996700	1.12	1	1.08	1.02	0.98	1.13	5933800	5299800	5703500	5390200	5194600	5996700	1.12	1	1.08	1.02	0.98	1.13	19	43	43	Carbamidomethylation; TMT10plex	273988	Nucleoprotein TPR OS=Mus musculus OX=10090 GN=Tpr PE=1 SV=1
195	1689	Q64727	8.34	334.94	4479800	4874700	5221500	5040300	4496800	5859200	0.92	1	1.07	1.03	0.92	1.2	4479800	4874700	5221500	5040300	4496800	5859200	0.92	1	1.07	1.03	0.92	1.2	31	34	34	Carbamidomethylation; TMT10plex	116717	Vinculin OS=Mus musculus OX=10090 GN=Vcl PE=1 SV=4
300	1288	Q9JKY5	2.44	333.8	2670800	2857200	2639100	2698900	2793200	2552600	0.93	1	0.92	0.94	0.98	0.89	2670800	2857200	2639100	2698900	2793200	2552600	0.93	1	0.92	0.94	0.98	0.89	34	30	30	Carbamidomethylation; TMT10plex	119426	Huntingtin-interacting protein 1-related protein OS=Mus musculus OX=10090 GN=Hip1r PE=1 SV=2
290	2253	Q9CWJ9	3.42	333.52	3953700	3965600	3749000	3774400	3668800	3414700	1	1	0.95	0.95	0.93	0.86	3953700	3965600	3749000	3774400	3668800	3414700	1	1	0.95	0.95	0.93	0.86	46	21	21	Carbamidomethylation; TMT10plex; Oxidation (M)	64217	Bifunctional purine biosynthesis protein PURH OS=Mus musculus OX=10090 GN=Atic PE=1 SV=2
198	99	P26443	6.33	333.03	17192000	15978000	16927000	16303000	14346000	14936000	1.08	1	1.06	1.02	0.9	0.93	17192000	15978000	16927000	16303000	14346000	14936000	1.08	1	1.06	1.02	0.9	0.93	47	24	24	Carbamidomethylation; TMT10plex; Oxidation (M)	61337	Glutamate dehydrogenase 1 mitochondrial OS=Mus musculus OX=10090 GN=Glud1 PE=1 SV=1
166	15687	Q922B2	2.15	332.39	8046600	8643100	8209800	8606400	8179900	8097700	0.93	1	0.95	1	0.95	0.94	8046600	8643100	8209800	8606400	8179900	8097700	0.93	1	0.95	1	0.95	0.94	56	28	28	Carbamidomethylation; TMT10plex	57147	Aspartate--tRNA ligase cytoplasmic OS=Mus musculus OX=10090 GN=Dars1 PE=1 SV=2
23	57	P63260	14.19	332.29	9110400	9135700	9618700	10189000	7215400	9411700	1	1	1.05	1.12	0.79	1.03	9110400	9135700	9618700	10189000	7215400	9411700	1	1	1.05	1.12	0.79	1.03	23	22	8	Carbamidomethylation; TMT10plex; Oxidation (M)	41793	Actin cytoplasmic 2 OS=Mus musculus OX=10090 GN=Actg1 PE=1 SV=1
23	58	P60710	14.19	332.29	9110400	9135700	9618700	10189000	7215400	9411700	1	1	1.05	1.12	0.79	1.03	9110400	9135700	9618700	10189000	7215400	9411700	1	1	1.05	1.12	0.79	1.03	23	22	8	Carbamidomethylation; TMT10plex; Oxidation (M)	41737	Actin cytoplasmic 1 OS=Mus musculus OX=10090 GN=Actb PE=1 SV=1
219	16	P70168	7.76	332.25	8957900	10241000	8457500	8532000	8763200	8975500	0.87	1	0.83	0.83	0.86	0.88	8957900	10241000	8457500	8532000	8763200	8975500	0.87	1	0.83	0.83	0.86	0.88	35	25	25	Carbamidomethylation; TMT10plex; Oxidation (M); Acetylation (Protein N-term)	97184	Importin subunit beta-1 OS=Mus musculus OX=10090 GN=Kpnb1 PE=1 SV=2
295	1850	P47857	2.24	331.5	5818200	5985000	6019600	6012200	5593700	6168800	0.97	1	1.01	1	0.93	1.03	5818200	5985000	6019600	6012200	5593700	6168800	0.97	1	1.01	1	0.93	1.03	34	25	21	Carbamidomethylation; TMT10plex	85269	ATP-dependent 6-phosphofructokinase muscle type OS=Mus musculus OX=10090 GN=Pfkm PE=1 SV=3
509	6638	Q8BVE3	16.45	331.12	4535300	4559900	4379700	4279200	6007800	4110900	0.99	1	0.96	0.94	1.32	0.9	4535300	4559900	4379700	4279200	6007800	4110900	0.99	1	0.96	0.94	1.32	0.9	41	19	19	Carbamidomethylation; TMT10plex; Oxidation (M)	55855	V-type proton ATPase subunit H OS=Mus musculus OX=10090 GN=Atp6v1h PE=1 SV=1
335	189	P50580	9.43	331.02	5266100	5650400	5403800	6556500	5912800	5775900	0.93	1	0.96	1.16	1.05	1.02	5266100	5650400	5403800	6556500	5912800	5775900	0.93	1	0.96	1.16	1.05	1.02	50	21	21	Carbamidomethylation; TMT10plex	43699	Proliferation-associated protein 2G4 OS=Mus musculus OX=10090 GN=Pa2g4 PE=1 SV=3
203	438	Q3TW96	3.72	330.94	11452000	10608000	11311000	11098000	10761000	10123000	1.08	1	1.07	1.05	1.01	0.95	11452000	10608000	11311000	11098000	10761000	10123000	1.08	1	1.07	1.05	1.01	0.95	44	24	22	Carbamidomethylation; TMT10plex; Oxidation (M)	56614	UDP-N-acetylhexosamine pyrophosphorylase-like protein 1 OS=Mus musculus OX=10090 GN=Uap1l1 PE=1 SV=1
267	359	Q8BH04	22.92	330.52	6372700	6530300	6442500	6422800	9498900	6527500	0.98	1	0.99	0.98	1.45	1	6372700	6530300	6442500	6422800	9498900	6527500	0.98	1	0.99	0.98	1.45	1	46	24	24	Carbamidomethylation; TMT10plex	70528	Phosphoenolpyruvate carboxykinase [GTP] mitochondrial OS=Mus musculus OX=10090 GN=Pck2 PE=1 SV=1
30	1196	Q9D6F9	2.35	330.4	322440	413570	377820	320410	288920	268430	0.78	1	0.91	0.77	0.7	0.65	322440	413570	377820	320410	288920	268430	0.78	1	0.91	0.77	0.7	0.65	6	20	2	TMT10plex	49586	Tubulin beta-4A chain OS=Mus musculus OX=10090 GN=Tubb4a PE=1 SV=3
239	1198	Q9D662	5.28	330.27	2178500	2458300	2126900	2249800	2255400	2114100	0.89	1	0.87	0.92	0.92	0.86	2178500	2458300	2126900	2249800	2255400	2114100	0.89	1	0.87	0.92	0.92	0.86	36	25	21	Carbamidomethylation; TMT10plex; Oxidation (M)	86437	Protein transport protein Sec23B OS=Mus musculus OX=10090 GN=Sec23b PE=1 SV=1
260	1222	Q9WUA3	5.07	330.18	5505900	5343600	5507800	5028100	5495500	4786300	1.03	1	1.03	0.94	1.03	0.9	5505900	5343600	5507800	5028100	5495500	4786300	1.03	1	1.03	0.94	1.03	0.9	33	25	21	Carbamidomethylation; TMT10plex	85455	ATP-dependent 6-phosphofructokinase platelet type OS=Mus musculus OX=10090 GN=Pfkp PE=1 SV=1
215	6194	Q501J6	2.18	330.03	4830400	5210700	4973400	5099900	4925300	4783200	0.93	1	0.95	0.98	0.95	0.92	4830400	5210700	4973400	5099900	4925300	4783200	0.93	1	0.95	0.98	0.95	0.92	27	28	18	Carbamidomethylation; TMT10plex	72400	Probable ATP-dependent RNA helicase DDX17 OS=Mus musculus OX=10090 GN=Ddx17 PE=1 SV=1
302	1626	Q9JLI8	1.65	329.92	2207500	2329700	2207600	2199500	2305200	2201900	0.95	1	0.95	0.94	0.99	0.95	2207500	2329700	2207600	2199500	2305200	2201900	0.95	1	0.95	0.94	0.99	0.95	31	26	26	Carbamidomethylation; TMT10plex	109619	Squamous cell carcinoma antigen recognized by T-cells 3 OS=Mus musculus OX=10090 GN=Sart3 PE=1 SV=1
304	4013	Q9R0K7	25.09	329.84	1132100	1149400	1201500	1858600	986870	1246700	0.98	1	1.05	1.62	0.86	1.08	1132100	1149400	1201500	1858600	986870	1246700	0.98	1	1.05	1.62	0.86	1.08	14	25	12	Carbamidomethylation; TMT10plex	132587	Plasma membrane calcium-transporting ATPase 2 OS=Mus musculus OX=10090 GN=Atp2b2 PE=1 SV=2
343	50	Q9EQK5	9.32	329.71	2956600	2938300	3182600	2683000	2560800	3042700	1.01	1	1.08	0.91	0.87	1.04	2956600	2938300	3182600	2683000	2560800	3042700	1.01	1	1.08	0.91	0.87	1.04	39	26	26	Carbamidomethylation; TMT10plex	95924	Major vault protein OS=Mus musculus OX=10090 GN=Mvp PE=1 SV=4
234	931	Q8CC88	4.33	329.35	2681400	2802500	2632900	2848000	2474100	2695800	0.96	1	0.94	1.02	0.88	0.96	2681400	2802500	2632900	2848000	2474100	2695800	0.96	1	0.94	1.02	0.88	0.96	23	38	38	Carbamidomethylation; TMT10plex	213420	von Willebrand factor A domain-containing protein 8 OS=Mus musculus OX=10090 GN=Vwa8 PE=1 SV=2
208	1588	Q61699	3.97	329.28	8482400	8387300	8130200	8001700	7465100	8406300	1.01	1	0.97	0.95	0.89	1	8482400	8387300	8130200	8001700	7465100	8406300	1.01	1	0.97	0.95	0.89	1	41	31	29	Carbamidomethylation; TMT10plex	96407	Heat shock protein 105 kDa OS=Mus musculus OX=10090 GN=Hsph1 PE=1 SV=2
120	1191	O35643	4.38	329.12	3285700	3175700	3347900	3306000	2952600	3059500	1.03	1	1.05	1.04	0.93	0.96	3285700	3175700	3347900	3306000	2952600	3059500	1.03	1	1.05	1.04	0.93	0.96	17	34	14	Carbamidomethylation; TMT10plex	103935	AP-1 complex subunit beta-1 OS=Mus musculus OX=10090 GN=Ap1b1 PE=1 SV=2
388	10906	O88533	22.45	329.03	4132600	4765500	4047500	4743300	5938500	4207800	0.87	1	0.85	1	1.25	0.88	4132600	4765500	4047500	4743300	5938500	4207800	0.87	1	0.85	1	1.25	0.88	33	15	15	Carbamidomethylation; TMT10plex; Oxidation (M)	53874	Aromatic-L-amino-acid decarboxylase OS=Mus musculus OX=10090 GN=Ddc PE=1 SV=1
252	46	Q8CGK3	8.92	328.64	8626000	7712600	8581000	7772900	6949000	7380100	1.12	1	1.11	1.01	0.9	0.96	8626000	7712600	8581000	7772900	6949000	7380100	1.12	1	1.11	1.01	0.9	0.96	30	30	30	Carbamidomethylation; TMT10plex; Oxidation (M)	105843	Lon protease homolog mitochondrial OS=Mus musculus OX=10090 GN=Lonp1 PE=1 SV=2
243	6845	Q9CZN7	5.99	328.44	7075100	7886100	6727600	6882900	7355300	6472900	0.9	1	0.85	0.87	0.93	0.82	7075100	7886100	6727600	6882900	7355300	6472900	0.9	1	0.85	0.87	0.93	0.82	41	21	20	Carbamidomethylation; TMT10plex	55759	Serine hydroxymethyltransferase mitochondrial OS=Mus musculus OX=10090 GN=Shmt2 PE=1 SV=1
186	2862	Q9D0E1	9.46	328.2	5461000	6316800	5071300	5787800	5839500	5772200	0.86	1	0.8	0.92	0.92	0.91	5461000	6316800	5071300	5787800	5839500	5772200	0.86	1	0.8	0.92	0.92	0.91	47	32	32	Carbamidomethylation; TMT10plex; Oxidation (M)	77649	Heterogeneous nuclear ribonucleoprotein M OS=Mus musculus OX=10090 GN=Hnrnpm PE=1 SV=3
325	679	Q9D0I9	4.78	327.4	7133100	7590700	7096600	6901300	6635900	7385500	0.94	1	0.93	0.91	0.87	0.97	7133100	7590700	7096600	6901300	6635900	7385500	0.94	1	0.93	0.91	0.87	0.97	47	28	28	Carbamidomethylation; TMT10plex; Oxidation (M)	75674	Arginine--tRNA ligase cytoplasmic OS=Mus musculus OX=10090 GN=Rars1 PE=1 SV=2
640	3744	P47738	11.04	326.37	5375200	4738000	5392300	5793000	6046300	5831400	1.13	1	1.14	1.22	1.28	1.23	5375200	4738000	5392300	5793000	6046300	5831400	1.13	1	1.14	1.22	1.28	1.23	34	19	18	Carbamidomethylation; TMT10plex	56538	Aldehyde dehydrogenase mitochondrial OS=Mus musculus OX=10090 GN=Aldh2 PE=1 SV=1
178	1029	Q62318	2.97	326.28	7764300	8517500	8278100	8175200	7913800	8003500	0.91	1	0.97	0.96	0.93	0.94	7764300	8517500	8278100	8175200	7913800	8003500	0.91	1	0.97	0.96	0.93	0.94	28	25	25	Carbamidomethylation; TMT10plex	88847	Transcription intermediary factor 1-beta OS=Mus musculus OX=10090 GN=Trim28 PE=1 SV=3
347	4266	Q8BMK4	6.81	325.87	6778300	6062500	6314200	6959100	5659300	7436600	1.12	1	1.04	1.15	0.93	1.23	6778300	6062500	6314200	6959100	5659300	7436600	1.12	1	1.04	1.15	0.93	1.23	44	27	27	TMT10plex	63692	Cytoskeleton-associated protein 4 OS=Mus musculus OX=10090 GN=Ckap4 PE=1 SV=2
125	8	P80318	6.38	325.66	20846000	19255000	20942000	19300000	17730000	18715000	1.08	1	1.09	1	0.92	0.97	20846000	19255000	20942000	19300000	17730000	18715000	1.08	1	1.09	1	0.92	0.97	52	26	26	Carbamidomethylation; TMT10plex; Oxidation (M)	60630	T-complex protein 1 subunit gamma OS=Mus musculus OX=10090 GN=Cct3 PE=1 SV=1
116	104	Q61207	6.71	325.52	18122000	20258000	20391000	18839000	22042000	21813000	0.89	1	1.01	0.93	1.09	1.08	18122000	20258000	20391000	18839000	22042000	21813000	0.89	1	1.01	0.93	1.09	1.08	49	23	23	Carbamidomethylation; TMT10plex; Oxidation (M)	61422	Prosaposin OS=Mus musculus OX=10090 GN=Psap PE=1 SV=2
48	284	Q9ERD7	9.94	325.22	494050	506760	528710	382710	444690	462470	0.97	1	1.04	0.76	0.88	0.91	494050	506760	528710	382710	444690	462470	0.97	1	1.04	0.76	0.88	0.91	8	23	4	TMT10plex; Oxidation (M)	50419	Tubulin beta-3 chain OS=Mus musculus OX=10090 GN=Tubb3 PE=1 SV=1
72	2354	P62259	2.05	324.94	13143000	13658000	13536000	13573000	14118000	14215000	0.96	1	0.99	0.99	1.03	1.04	13143000	13658000	13536000	13573000	14118000	14215000	0.96	1	0.99	0.99	1.03	1.04	69	22	20	Carbamidomethylation; TMT10plex; Oxidation (M); Acetylation (Protein N-term)	29174	14-3-3 protein epsilon OS=Mus musculus OX=10090 GN=Ywhae PE=1 SV=1
289	664	Q9EPU0	4.87	324.59	4655700	4716100	4796200	4300700	4206100	4184800	0.99	1	1.02	0.91	0.89	0.89	4655700	4716100	4796200	4300700	4206100	4184800	0.99	1	1.02	0.91	0.89	0.89	35	30	30	Carbamidomethylation; TMT10plex	123967	Regulator of nonsense transcripts 1 OS=Mus musculus OX=10090 GN=Upf1 PE=1 SV=2
307	940	P17427	4.26	324.56	2930900	3176500	2833500	2899700	2808800	2681200	0.92	1	0.89	0.91	0.88	0.84	2930900	3176500	2833500	2899700	2808800	2681200	0.92	1	0.89	0.91	0.88	0.84	21	27	18	Carbamidomethylation; TMT10plex	104016	AP-2 complex subunit alpha-2 OS=Mus musculus OX=10090 GN=Ap2a2 PE=1 SV=2
287	1761	G5E829	10.79	324.55	1932900	2155900	1884900	1908200	1695700	1656500	0.9	1	0.87	0.89	0.79	0.77	1932900	2155900	1884900	1908200	1695700	1656500	0.9	1	0.87	0.89	0.79	0.77	11	25	11	Carbamidomethylation; TMT10plex	134747	Plasma membrane calcium-transporting ATPase 1 OS=Mus musculus OX=10090 GN=Atp2b1 PE=1 SV=1
324	256	Q8BMA6	2.55	324.44	7764200	7645500	7154200	7388000	7154100	7430500	1.02	1	0.94	0.97	0.94	0.97	7764200	7645500	7154200	7388000	7154100	7430500	1.02	1	0.94	0.97	0.94	0.97	44	26	26	Carbamidomethylation; TMT10plex	70574	Signal recognition particle subunit SRP68 OS=Mus musculus OX=10090 GN=Srp68 PE=1 SV=2
238	165	Q00612	6.49	324.18	10584000	10609000	11796000	10434000	10581000	9965800	1	1	1.11	0.98	1	0.94	10584000	10609000	11796000	10434000	10581000	9965800	1	1	1.11	0.98	1	0.94	51	27	27	Carbamidomethylation; TMT10plex	59263	Glucose-6-phosphate 1-dehydrogenase X OS=Mus musculus OX=10090 GN=G6pdx PE=1 SV=3
368	6202	Q91YT0	8.51	324.15	9673100	8920400	8893200	8341700	9295800	7554100	1.08	1	1	0.94	1.04	0.85	9673100	8920400	8893200	8341700	9295800	7554100	1.08	1	1	0.94	1.04	0.85	48	21	21	Carbamidomethylation; TMT10plex; Oxidation (M)	50834	NADH dehydrogenase [ubiquinone] flavoprotein 1 mitochondrial OS=Mus musculus OX=10090 GN=Ndufv1 PE=1 SV=1
258	347	Q99LC5	8.7	324.07	9338200	10379000	8994400	9587200	8434400	8497000	0.9	1	0.87	0.92	0.81	0.82	9338200	10379000	8994400	9587200	8434400	8497000	0.9	1	0.87	0.92	0.81	0.82	52	15	15	Carbamidomethylation; TMT10plex; Oxidation (M)	35009	Electron transfer flavoprotein subunit alpha mitochondrial OS=Mus musculus OX=10090 GN=Etfa PE=1 SV=2
140	1883	Q8VDJ3	6.15	323.78	11615000	11338000	10572000	11137000	9641300	10754000	1.02	1	0.93	0.98	0.85	0.95	11615000	11338000	10572000	11137000	9641300	10754000	1.02	1	0.93	0.98	0.85	0.95	33	40	40	Carbamidomethylation; TMT10plex	141742	Vigilin OS=Mus musculus OX=10090 GN=Hdlbp PE=1 SV=1
189	589	Q62465	6.15	323.57	27339000	27585000	31080000	26742000	26431000	27001000	0.99	1	1.13	0.97	0.96	0.98	27339000	27585000	31080000	26742000	26431000	27001000	0.99	1	1.13	0.97	0.96	0.98	40	16	16	Carbamidomethylation; TMT10plex; Oxidation (M)	43097	Synaptic vesicle membrane protein VAT-1 homolog OS=Mus musculus OX=10090 GN=Vat1 PE=1 SV=3
323	544	Q7TPV4	10.37	323.49	3298100	3443700	3719200	3614200	2944100	3089500	0.96	1	1.08	1.05	0.85	0.9	3298100	3443700	3719200	3614200	2944100	3089500	0.96	1	1.08	1.05	0.85	0.9	26	29	29	Carbamidomethylation; TMT10plex	152036	Myb-binding protein 1A OS=Mus musculus OX=10090 GN=Mybbp1a PE=1 SV=2
118	688	P14733	3.46	322.75	6053700	5690500	5659600	6004900	5125000	5826200	1.06	1	0.99	1.06	0.9	1.02	6053700	5690500	5659600	6004900	5125000	5826200	1.06	1	0.99	1.06	0.9	1.02	53	40	33	Carbamidomethylation; TMT10plex	66786	Lamin-B1 OS=Mus musculus OX=10090 GN=Lmnb1 PE=1 SV=3
414	2067	Q9QZE5	6.13	322.7	5225000	5270000	5430300	4924300	5211700	4619400	0.99	1	1.03	0.93	0.99	0.88	5225000	5270000	5430300	4924300	5211700	4619400	0.99	1	1.03	0.93	0.99	0.88	29	24	19	Carbamidomethylation; TMT10plex	97513	Coatomer subunit gamma-1 OS=Mus musculus OX=10090 GN=Copg1 PE=1 SV=1
117	198	Q91YQ5	3.75	322.58	16069000	15938000	15483000	14858000	15170000	14115000	1.01	1	0.97	0.93	0.95	0.89	16069000	15938000	15483000	14858000	15170000	14115000	1.01	1	0.97	0.93	0.95	0.89	54	31	31	Carbamidomethylation; TMT10plex	68528	Dolichyl-diphosphooligosaccharide--protein glycosyltransferase subunit 1 OS=Mus musculus OX=10090 GN=Rpn1 PE=1 SV=1
588	1498	Q61301	4.71	322.25	658180	667600	620970	594930	709270	669100	0.99	1	0.93	0.89	1.06	1	658180	667600	620970	594930	709270	669100	0.99	1	0.93	0.89	1.06	1	18	19	12	Carbamidomethylation; TMT10plex	105286	Catenin alpha-2 OS=Mus musculus OX=10090 GN=Ctnna2 PE=1 SV=3
502	2322	P43247	7.8	321.64	2036600	2193700	1930800	1802200	2089500	2020400	0.93	1	0.88	0.82	0.95	0.92	2036600	2193700	1930800	1802200	2089500	2020400	0.93	1	0.88	0.82	0.95	0.92	29	24	24	Carbamidomethylation; TMT10plex	104151	DNA mismatch repair protein Msh2 OS=Mus musculus OX=10090 GN=Msh2 PE=1 SV=1
179	6381	Q922R8	10.55	321.45	20707000	21544000	18036000	19889000	22180000	22849000	0.96	1	0.84	0.92	1.03	1.06	20707000	21544000	18036000	19889000	22180000	22849000	0.96	1	0.84	0.92	1.03	1.06	46	18	18	Carbamidomethylation; TMT10plex	48100	Protein disulfide-isomerase A6 OS=Mus musculus OX=10090 GN=Pdia6 PE=1 SV=3
176	268	Q6NZJ6	4.13	321.37	4574400	4724800	4673900	4583300	4189600	4648000	0.97	1	0.99	0.97	0.89	0.98	4574400	4724800	4673900	4583300	4189600	4648000	0.97	1	0.99	0.97	0.89	0.98	22	40	34	Carbamidomethylation; TMT10plex	176076	Eukaryotic translation initiation factor 4 gamma 1 OS=Mus musculus OX=10090 GN=Eif4g1 PE=1 SV=1
59	15690	P48962	7.64	321.32	13592000	16426000	14739000	14636000	17311000	15100000	0.83	1	0.9	0.89	1.05	0.92	13592000	16426000	14739000	14636000	17311000	15100000	0.83	1	0.9	0.89	1.05	0.92	31	23	12	Carbamidomethylation; TMT10plex; Oxidation (M)	32904	ADP/ATP translocase 1 OS=Mus musculus OX=10090 GN=Slc25a4 PE=1 SV=4
149	109	P62821	11.2	321.04	12217000	13253000	12189000	11880000	10360000	11570000	0.92	1	0.92	0.9	0.78	0.87	12217000	13253000	12189000	11880000	10360000	11570000	0.92	1	0.92	0.9	0.78	0.87	47	18	11	Carbamidomethylation; TMT10plex; Oxidation (M)	22678	Ras-related protein Rab-1A OS=Mus musculus OX=10090 GN=Rab1A PE=1 SV=3
50	60	P51881	2.95	320.91	22766000	21071000	21416000	21459000	21944000	20643000	1.08	1	1.02	1.02	1.04	0.98	22766000	21071000	21416000	21459000	21944000	20643000	1.08	1	1.02	1.02	1.04	0.98	27	22	11	Carbamidomethylation; TMT10plex; Oxidation (M)	32931	ADP/ATP translocase 2 OS=Mus musculus OX=10090 GN=Slc25a5 PE=1 SV=3
356	5577	Q8BMJ2	5.49	320.32	3176900	2948300	3106900	3008600	2769500	2676400	1.08	1	1.05	1.02	0.94	0.91	3176900	2948300	3106900	3008600	2769500	2676400	1.08	1	1.05	1.02	0.94	0.91	27	28	28	Carbamidomethylation; TMT10plex	134192	Leucine--tRNA ligase cytoplasmic OS=Mus musculus OX=10090 GN=Lars1 PE=1 SV=2
523	755	Q9EQ20	3.47	319.65	2922100	3138200	3134500	2977800	3481500	3084600	0.93	1	1	0.95	1.11	0.98	2922100	3138200	3134500	2977800	3481500	3084600	0.93	1	1	0.95	1.11	0.98	41	20	20	Carbamidomethylation; TMT10plex	57916	Methylmalonate-semialdehyde dehydrogenase [acylating] mitochondrial OS=Mus musculus OX=10090 GN=Aldh6a1 PE=1 SV=1
214	2417	P80317	6.19	319.49	18527000	18219000	17755000	16760000	15480000	16909000	1.02	1	0.97	0.92	0.85	0.93	18527000	18219000	17755000	16760000	15480000	16909000	1.02	1	0.97	0.92	0.85	0.93	43	24	24	Carbamidomethylation; TMT10plex	58004	T-complex protein 1 subunit zeta OS=Mus musculus OX=10090 GN=Cct6a PE=1 SV=3
477	15693	P29758	24.93	318.59	6372700	5065100	6693700	6156100	7620800	6651300	1.26	1	1.32	1.22	1.5	1.31	6372700	5065100	6693700	6156100	7620800	6651300	1.26	1	1.32	1.22	1.5	1.31	47	19	19	Carbamidomethylation; TMT10plex	48355	Ornithine aminotransferase mitochondrial OS=Mus musculus OX=10090 GN=Oat PE=1 SV=1
228	2050	Q9CZD3	1.84	318.47	7693000	7926500	7976600	7653100	8349600	8343800	0.97	1	1.01	0.97	1.05	1.05	7693000	7926500	7976600	7653100	8349600	8343800	0.97	1	1.01	0.97	1.05	1.05	35	25	25	Carbamidomethylation; TMT10plex; Oxidation (M)	81878	Glycine--tRNA ligase OS=Mus musculus OX=10090 GN=Gars1 PE=1 SV=1
306	2532	Q80SW1	13.65	317.44	4049300	4118200	4135300	3603000	3124200	3546800	0.98	1	1	0.87	0.76	0.86	4049300	4118200	4135300	3603000	3124200	3546800	0.98	1	1	0.87	0.76	0.86	22	27	13	Carbamidomethylation; TMT10plex	58952	S-adenosylhomocysteine hydrolase-like protein 1 OS=Mus musculus OX=10090 GN=Ahcyl1 PE=1 SV=1
340	389	Q62383	3.76	317.39	2076700	2166800	1969500	2083600	2202400	2053900	0.96	1	0.91	0.96	1.02	0.95	2076700	2166800	1969500	2083600	2202400	2053900	0.96	1	0.91	0.96	1.02	0.95	23	30	30	Carbamidomethylation; TMT10plex	199084	Transcription elongation factor SPT6 OS=Mus musculus OX=10090 GN=Supt6h PE=1 SV=2
167	1352	Q5XJY5	3.28	316.76	12266000	12065000	11418000	11127000	11206000	10763000	1.02	1	0.95	0.92	0.93	0.89	12266000	12065000	11418000	11127000	11206000	10763000	1.02	1	0.95	0.92	0.93	0.89	50	32	32	Carbamidomethylation; TMT10plex	57230	Coatomer subunit delta OS=Mus musculus OX=10090 GN=Arcn1 PE=1 SV=2
53	28	P05202	5.44	316.06	44856000	46547000	47224000	42578000	40726000	40773000	0.96	1	1.01	0.91	0.87	0.88	44856000	46547000	47224000	42578000	40726000	40773000	0.96	1	1.01	0.91	0.87	0.88	57	29	29	Carbamidomethylation; TMT10plex; Oxidation (M)	47411	Aspartate aminotransferase mitochondrial OS=Mus musculus OX=10090 GN=Got2 PE=1 SV=1
236	279	Q91VR5	1.84	315.89	3601400	3773800	3558400	3758900	3546400	3447500	0.95	1	0.94	1	0.94	0.91	3601400	3773800	3558400	3758900	3546400	3447500	0.95	1	0.94	1	0.94	0.91	39	28	28	Carbamidomethylation; TMT10plex	82500	ATP-dependent RNA helicase DDX1 OS=Mus musculus OX=10090 GN=Ddx1 PE=1 SV=1
334	160	O88342	2.4	315.72	9037200	9001000	8521300	8359900	8757900	8671400	1	1	0.95	0.93	0.97	0.96	9037200	9001000	8521300	8359900	8757900	8671400	1	1	0.95	0.93	0.97	0.96	43	20	20	Carbamidomethylation; TMT10plex	66407	WD repeat-containing protein 1 OS=Mus musculus OX=10090 GN=Wdr1 PE=1 SV=3
242	1842	O35286	1.48	315.44	7229900	7298600	7213700	7565300	7009200	7106900	0.99	1	0.99	1.04	0.96	0.97	7229900	7298600	7213700	7565300	7009200	7106900	0.99	1	0.99	1.04	0.96	0.97	38	32	32	Carbamidomethylation; TMT10plex	91007	Pre-mRNA-splicing factor ATP-dependent RNA helicase DHX15 OS=Mus musculus OX=10090 GN=Dhx15 PE=1 SV=2
352	4933	Q99NB9	5.64	315.42	2217700	2233700	2293000	2328300	2161100	2669700	0.99	1	1.03	1.04	0.97	1.2	2217700	2233700	2293000	2328300	2161100	2669700	0.99	1	1.03	1.04	0.97	1.2	24	27	27	Carbamidomethylation; TMT10plex	145816	Splicing factor 3B subunit 1 OS=Mus musculus OX=10090 GN=Sf3b1 PE=1 SV=1
201	417	P16014	29.04	315.29	6813100	9269800	7535200	9159800	11788000	8637700	0.73	1	0.81	0.99	1.27	0.93	6813100	9269800	7535200	9159800	11788000	8637700	0.73	1	0.81	0.99	1.27	0.93	38	25	25	Carbamidomethylation; TMT10plex	77969	Secretogranin-1 OS=Mus musculus OX=10090 GN=Chgb PE=1 SV=2
373	502	Q9D0F9	6.17	315.02	6788200	6904600	7460300	7335100	6695200	6341400	0.98	1	1.08	1.06	0.97	0.92	6788200	6904600	7460300	7335100	6695200	6341400	0.98	1	1.08	1.06	0.97	0.92	35	21	21	Carbamidomethylation; TMT10plex	61418	Phosphoglucomutase-1 OS=Mus musculus OX=10090 GN=Pgm1 PE=1 SV=4
440	5362	Q9EPE9	3.65	314.79	3158700	3184300	3114900	3123000	3032600	2792700	0.99	1	0.98	0.98	0.95	0.88	3158700	3184300	3114900	3123000	3032600	2792700	0.99	1	0.98	0.98	0.95	0.88	25	24	24	Carbamidomethylation; TMT10plex	132388	Manganese-transporting ATPase 13A1 OS=Mus musculus OX=10090 GN=Atp13a1 PE=1 SV=2
331	3013	Q9Z0X1	5.28	314.67	4781200	4717000	4929500	4717000	4265300	4609500	1.01	1	1.05	1	0.9	0.98	4781200	4717000	4929500	4717000	4265300	4609500	1.01	1	1.05	1	0.9	0.98	44	22	22	Carbamidomethylation; TMT10plex; Oxidation (M)	66766	Apoptosis-inducing factor 1 mitochondrial OS=Mus musculus OX=10090 GN=Aifm1 PE=1 SV=1
462	2702	O08784	2.44	314.52	4261700	4563700	4611000	4521200	4859000	4700600	0.93	1	1.01	0.99	1.06	1.03	4261700	4563700	4611000	4521200	4859000	4700600	0.93	1	1.01	0.99	1.06	1.03	19	22	22	TMT10plex	135001	Treacle protein OS=Mus musculus OX=10090 GN=Tcof1 PE=1 SV=1
320	2321	Q6A065	4.59	314.14	2892700	2619200	3003500	2845500	2755500	2686000	1.1	1	1.15	1.09	1.05	1.03	2892700	2619200	3003500	2845500	2755500	2686000	1.1	1	1.15	1.09	1.05	1.03	24	29	29	Carbamidomethylation; TMT10plex	175049	Centrosomal protein of 170 kDa OS=Mus musculus OX=10090 GN=Cep170 PE=1 SV=2
284	1257	Q8BJ71	6.05	314.13	5837200	5651000	5602600	5285900	4814400	5337600	1.03	1	0.99	0.94	0.85	0.94	5837200	5651000	5602600	5285900	4814400	5337600	1.03	1	0.99	0.94	0.85	0.94	34	29	29	Carbamidomethylation; TMT10plex	93281	Nuclear pore complex protein Nup93 OS=Mus musculus OX=10090 GN=Nup93 PE=1 SV=1
530	3727	P28798	63.03	314.09	8966800	6560300	9674400	10289000	13170000	11057000	1.37	1	1.47	1.57	2.01	1.69	8966800	6560300	9674400	10289000	13170000	11057000	1.37	1	1.47	1.57	2.01	1.69	34	17	17	Carbamidomethylation; TMT10plex; Oxidation (M)	63458	Progranulin OS=Mus musculus OX=10090 GN=Grn PE=1 SV=2
268	3643	Q8JZQ9	4.69	314	6167900	5995300	5830900	5403100	5637400	5369400	1.03	1	0.97	0.9	0.94	0.9	6167900	5995300	5830900	5403100	5637400	5369400	1.03	1	0.97	0.9	0.94	0.9	32	27	27	Carbamidomethylation; TMT10plex	91370	Eukaryotic translation initiation factor 3 subunit B OS=Mus musculus OX=10090 GN=Eif3b PE=1 SV=1
259	336	Q9CPY7	3.02	313.98	10210000	10567000	10111000	9777200	11098000	10845000	0.97	1	0.96	0.93	1.05	1.03	10210000	10567000	10111000	9777200	11098000	10845000	0.97	1	0.96	0.93	1.05	1.03	54	23	23	Carbamidomethylation; TMT10plex	56141	Cytosol aminopeptidase OS=Mus musculus OX=10090 GN=Lap3 PE=1 SV=3
550	214	Q8CHC4	2.86	313.39	1361700	1461600	1360600	1332000	1350600	1257400	0.93	1	0.93	0.91	0.92	0.86	1361700	1461600	1360600	1332000	1350600	1257400	0.93	1	0.93	0.91	0.92	0.86	18	22	22	Carbamidomethylation; TMT10plex	172616	Synaptojanin-1 OS=Mus musculus OX=10090 GN=Synj1 PE=1 SV=3
241	920	Q3TXS7	2.32	313.06	9323500	9311000	9276700	8925400	8632900	8910300	1	1	1	0.96	0.93	0.96	9323500	9311000	9276700	8925400	8632900	8910300	1	1	1	0.96	0.93	0.96	39	28	28	Carbamidomethylation; TMT10plex	105730	26S proteasome non-ATPase regulatory subunit 1 OS=Mus musculus OX=10090 GN=Psmd1 PE=1 SV=1
114	828	Q9JJZ2	17.62	312.22	25478	30325	24456	30862	16217	7246	0.84	1	0.81	1.02	0.53	0.24	25478	30325	24456	30862	16217	7246	0.84	1	0.81	1.02	0.53	0.24	6	15	2	TMT10plex	50052	Tubulin alpha-8 chain OS=Mus musculus OX=10090 GN=Tuba8 PE=1 SV=1
317	1145	Q02819	15.82	312.15	7728100	7124900	8101300	9131900	9697300	10858000	1.08	1	1.14	1.28	1.36	1.52	7728100	7124900	8101300	9131900	9697300	10858000	1.08	1	1.14	1.28	1.36	1.52	61	27	27	TMT10plex	53409	Nucleobindin-1 OS=Mus musculus OX=10090 GN=Nucb1 PE=1 SV=2
173	314	Q4VA53	3.2	311.85	4795200	5133600	4637500	4995200	4969900	4583000	0.93	1	0.9	0.97	0.97	0.89	4795200	5133600	4637500	4995200	4969900	4583000	0.93	1	0.9	0.97	0.97	0.89	23	37	29	Carbamidomethylation; TMT10plex	164418	Sister chromatid cohesion protein PDS5 homolog B OS=Mus musculus OX=10090 GN=Pds5b PE=1 SV=1
269	2243	Q8VC28	2.14	311.67	13280000	13715000	12937000	12971000	13031000	12469000	0.97	1	0.94	0.95	0.95	0.91	13280000	13715000	12937000	12971000	13031000	12469000	0.97	1	0.94	0.95	0.95	0.91	73	21	20	Carbamidomethylation; TMT10plex	37058	Aldo-keto reductase family 1 member C13 OS=Mus musculus OX=10090 GN=Akr1c13 PE=1 SV=2
303	1030	O88428	5.92	311.29	8134300	7091300	7738100	6948400	7096400	6733200	1.15	1	1.09	0.98	1	0.95	8134300	7091300	7738100	6948400	7096400	6733200	1.15	1	1.09	0.98	1	0.95	49	29	28	Carbamidomethylation; TMT10plex	70351	Bifunctional 3'-phosphoadenosine 5'-phosphosulfate synthase 2 OS=Mus musculus OX=10090 GN=Papss2 PE=1 SV=2
301	32	P28738	5.85	311.13	2005900	2056300	1849100	2009800	1758900	1657900	0.98	1	0.9	0.98	0.86	0.81	2005900	2056300	1849100	2009800	1758900	1657900	0.98	1	0.9	0.98	0.86	0.81	22	30	18	Carbamidomethylation; TMT10plex	109275	Kinesin heavy chain isoform 5C OS=Mus musculus OX=10090 GN=Kif5c PE=1 SV=3
194	2514	P21661	18.28	310.99	15206000	18761000	15682000	16340000	21983000	15802000	0.81	1	0.84	0.87	1.17	0.84	15206000	18761000	15682000	16340000	21983000	15802000	0.81	1	0.84	0.87	1.17	0.84	37	21	21	Carbamidomethylation; TMT10plex; Oxidation (M)	70785	Neuroendocrine convertase 2 OS=Mus musculus OX=10090 GN=Pcsk2 PE=1 SV=1
369	404	Q61033	7.94	310.89	831190	979220	872680	1036000	956600	947430	0.85	1	0.89	1.06	0.98	0.97	831190	979220	872680	1036000	956600	947430	0.85	1	0.89	1.06	0.98	0.97	24	23	14	Carbamidomethylation; TMT10plex	75168	Lamina-associated polypeptide 2 isoforms alpha/zeta OS=Mus musculus OX=10090 GN=Tmpo PE=1 SV=4
344	1654	P52825	2.03	310.84	6467000	6919100	6604000	6550100	6759400	6277200	0.93	1	0.95	0.95	0.98	0.91	6467000	6919100	6604000	6550100	6759400	6277200	0.93	1	0.95	0.95	0.98	0.91	47	27	27	Carbamidomethylation; TMT10plex	73981	Carnitine O-palmitoyltransferase 2 mitochondrial OS=Mus musculus OX=10090 GN=Cpt2 PE=1 SV=2
395	2667	Q9DBT5	2.21	310.8	7166100	7275100	7042100	7040100	6788100	6548500	0.99	1	0.97	0.97	0.93	0.9	7166100	7275100	7042100	7040100	6788100	6548500	0.99	1	0.97	0.97	0.93	0.9	29	25	25	Carbamidomethylation; TMT10plex	92024	AMP deaminase 2 OS=Mus musculus OX=10090 GN=Ampd2 PE=1 SV=1
511	4558	Q80TB8	8.37	310.33	7470700	7454400	7238300	6975400	6797300	5915100	1	1	0.97	0.94	0.91	0.79	7470700	7454400	7238300	6975400	6797300	5915100	1	1	0.97	0.94	0.91	0.79	42	19	19	Carbamidomethylation; TMT10plex	45817	Synaptic vesicle membrane protein VAT-1 homolog-like OS=Mus musculus OX=10090 GN=Vat1l PE=1 SV=2
200	1473	P70398	3.09	310.29	4437900	4336500	4614600	4164100	4473500	4234600	1.02	1	1.06	0.96	1.03	0.98	4437900	4336500	4614600	4164100	4473500	4234600	1.02	1	1.06	0.96	1.03	0.98	15	35	35	Carbamidomethylation; TMT10plex	290709	Probable ubiquitin carboxyl-terminal hydrolase FAF-X OS=Mus musculus OX=10090 GN=Usp9x PE=1 SV=2
529	639	O88544	4.95	310.23	2898800	2696500	2768300	2948600	3045400	3177900	1.08	1	1.03	1.09	1.13	1.18	2898800	2696500	2768300	2948600	3045400	3177900	1.08	1	1.03	1.09	1.13	1.18	49	17	17	Carbamidomethylation; TMT10plex	46285	COP9 signalosome complex subunit 4 OS=Mus musculus OX=10090 GN=Cops4 PE=1 SV=1
433	1932	P61922	6.02	310.05	3827500	4489900	3839900	3840500	4079500	4252700	0.85	1	0.86	0.86	0.91	0.95	3827500	4489900	3839900	3840500	4079500	4252700	0.85	1	0.86	0.86	0.91	0.95	48	19	19	Carbamidomethylation; TMT10plex; Oxidation (M)	56452	4-aminobutyrate aminotransferase mitochondrial OS=Mus musculus OX=10090 GN=Abat PE=1 SV=1
353	2956	P58281	3.9	309.93	4490000	4625900	4495800	4435100	5043500	4020600	0.97	1	0.97	0.96	1.09	0.87	4490000	4625900	4495800	4435100	5043500	4020600	0.97	1	0.97	0.96	1.09	0.87	36	29	29	Carbamidomethylation; TMT10plex	111339	Dynamin-like 120 kDa protein mitochondrial OS=Mus musculus OX=10090 GN=Opa1 PE=1 SV=1
170	55	Q8VEK3	6.99	309.87	19178000	20413000	19201000	19209000	17088000	19183000	0.94	1	0.94	0.94	0.84	0.94	19178000	20413000	19201000	19209000	17088000	19183000	0.94	1	0.94	0.94	0.84	0.94	30	28	28	Carbamidomethylation; TMT10plex; Oxidation (M)	87918	Heterogeneous nuclear ribonucleoprotein U OS=Mus musculus OX=10090 GN=Hnrnpu PE=1 SV=1
196	1985	Q8C1A5	23.37	309.84	4802300	4825300	4566200	4728400	6763500	4731700	1	1	0.95	0.98	1.4	0.98	4802300	4825300	4566200	4728400	6763500	4731700	1	1	0.95	0.98	1.4	0.98	45	30	30	Carbamidomethylation; TMT10plex	78026	Thimet oligopeptidase OS=Mus musculus OX=10090 GN=Thop1 PE=1 SV=1
393	1489	Q99P72	17.24	309.58	4188600	3314700	4127300	3637500	2980600	3908500	1.26	1	1.25	1.1	0.9	1.18	4188600	3314700	4127300	3637500	2980600	3908500	1.26	1	1.25	1.1	0.9	1.18	20	19	19	Carbamidomethylation; TMT10plex	126613	Reticulon-4 OS=Mus musculus OX=10090 GN=Rtn4 PE=1 SV=2
159	1169	Q922F4	10.96	309.57	603300	573330	570710	558160	449840	630740	1.05	1	1	0.97	0.78	1.1	603300	573330	570710	558160	449840	630740	1.05	1	1	0.97	0.78	1.1	13	19	5	Carbamidomethylation; TMT10plex	50090	Tubulin beta-6 chain OS=Mus musculus OX=10090 GN=Tubb6 PE=1 SV=1
769	423	Q8BRF7	9.8	309.31	2380000	2700600	2167700	2210400	2714500	2507100	0.88	1	0.8	0.82	1.01	0.93	2380000	2700600	2167700	2210400	2714500	2507100	0.88	1	0.8	0.82	1.01	0.93	36	17	17	Carbamidomethylation; TMT10plex; Oxidation (M)	72323	Sec1 family domain-containing protein 1 OS=Mus musculus OX=10090 GN=Scfd1 PE=1 SV=1
99	192	P48036	3.61	309.24	33053000	32265000	34031000	31737000	32099000	30541000	1.02	1	1.05	0.98	0.99	0.95	33053000	32265000	34031000	31737000	32099000	30541000	1.02	1	1.05	0.98	0.99	0.95	73	28	28	Carbamidomethylation; TMT10plex; Oxidation (M)	35752	Annexin A5 OS=Mus musculus OX=10090 GN=Anxa5 PE=1 SV=1
338	5241	Q921M3	11.73	309.17	5175800	5180000	5160000	5419300	4018500	4997100	1	1	1	1.05	0.78	0.96	5175800	5180000	5160000	5419300	4018500	4997100	1	1	1	1.05	0.78	0.96	27	29	29	Carbamidomethylation; TMT10plex	135550	Splicing factor 3B subunit 3 OS=Mus musculus OX=10090 GN=Sf3b3 PE=1 SV=1
31	5	P14211	6.45	308.89	140730000	144610000	128500000	138520000	132210000	151970000	0.97	1	0.89	0.96	0.91	1.05	140730000	144610000	128500000	138520000	132210000	151970000	0.97	1	0.89	0.96	0.91	1.05	62	27	27	Carbamidomethylation; TMT10plex; Oxidation (M)	47995	Calreticulin OS=Mus musculus OX=10090 GN=Calr PE=1 SV=1
327	1316	B2RXS4	19.61	308.8	1475000	1440100	1636900	1296500	1348500	1150300	1.02	1	1.14	0.9	0.94	0.8	1475000	1440100	1636900	1296500	1348500	1150300	1.02	1	1.14	0.9	0.94	0.8	18	26	26	Carbamidomethylation; TMT10plex	206229	Plexin-B2 OS=Mus musculus OX=10090 GN=Plxnb2 PE=1 SV=1
342	141	P54276	7.48	308.56	2436900	2589100	2197000	2264600	2148400	2106900	0.94	1	0.85	0.87	0.83	0.81	2436900	2589100	2197000	2264600	2148400	2106900	0.94	1	0.85	0.87	0.83	0.81	21	26	26	Carbamidomethylation; TMT10plex	151083	DNA mismatch repair protein Msh6 OS=Mus musculus OX=10090 GN=Msh6 PE=1 SV=3
504	643	P81117	12.06	308.34	8669600	7625900	8467300	9876400	9675800	10836000	1.14	1	1.11	1.3	1.27	1.42	8669600	7625900	8467300	9876400	9675800	10836000	1.14	1	1.11	1.3	1.27	1.42	55	21	21	TMT10plex	50305	Nucleobindin-2 OS=Mus musculus OX=10090 GN=Nucb2 PE=1 SV=2
164	1132	P37040	5.5	308.18	14744000	13834000	13903000	13301000	13056000	12393000	1.07	1	1.01	0.96	0.94	0.9	14744000	13834000	13903000	13301000	13056000	12393000	1.07	1	1.01	0.96	0.94	0.9	49	30	30	Carbamidomethylation; TMT10plex; Oxidation (M)	77044	NADPH--cytochrome P450 reductase OS=Mus musculus OX=10090 GN=Por PE=1 SV=2
332	182	Q99MN1	4.73	307.93	8163000	8453700	8122700	7838900	7398100	8120900	0.97	1	0.96	0.93	0.88	0.96	8163000	8453700	8122700	7838900	7398100	8120900	0.97	1	0.96	0.93	0.88	0.96	35	25	25	Carbamidomethylation; TMT10plex	67840	Lysine--tRNA ligase OS=Mus musculus OX=10090 GN=Kars1 PE=1 SV=1
191	667	P24527	3.38	307.9	7534400	7744000	7304200	7815800	8095300	7677200	0.97	1	0.94	1.01	1.05	0.99	7534400	7744000	7304200	7815800	8095300	7677200	0.97	1	0.94	1.01	1.05	0.99	49	27	27	Carbamidomethylation; TMT10plex	69051	Leukotriene A-4 hydrolase OS=Mus musculus OX=10090 GN=Lta4h PE=1 SV=4
151	1789	O55029	1.1	307.89	15266000	15165000	15670000	15452000	15203000	15062000	1.01	1	1.03	1.02	1	0.99	15266000	15165000	15670000	15452000	15203000	15062000	1.01	1	1.03	1.02	1	0.99	39	33	33	Carbamidomethylation; TMT10plex	102449	Coatomer subunit beta' OS=Mus musculus OX=10090 GN=Copb2 PE=1 SV=2
475	2144	Q99MN9	8.67	307.75	1741200	1791900	1795600	1670900	1460200	1576600	0.97	1	1	0.93	0.81	0.88	1741200	1791900	1795600	1670900	1460200	1576600	0.97	1	1	0.93	0.81	0.88	51	21	21	Carbamidomethylation; TMT10plex	58409	Propionyl-CoA carboxylase beta chain mitochondrial OS=Mus musculus OX=10090 GN=Pccb PE=1 SV=2
296	2696	Q91WJ8	9.8	307.71	5664000	6052100	5831900	5771800	5694000	7303000	0.94	1	0.96	0.95	0.94	1.21	5664000	6052100	5831900	5771800	5694000	7303000	0.94	1	0.96	0.95	0.94	1.21	31	22	19	Carbamidomethylation; TMT10plex	68540	Far upstream element-binding protein 1 OS=Mus musculus OX=10090 GN=Fubp1 PE=1 SV=1
472	1405	P97429	4.29	307.37	6379000	6286500	6221500	5940200	6129800	5497300	1.01	1	0.99	0.94	0.98	0.87	6379000	6286500	6221500	5940200	6129800	5497300	1.01	1	0.99	0.94	0.98	0.87	55	21	20	Carbamidomethylation; TMT10plex	35916	Annexin A4 OS=Mus musculus OX=10090 GN=Anxa4 PE=1 SV=4
254	7256	Q3THK7	8.09	307.32	6451200	5634500	6179100	5727800	5074000	5125100	1.14	1	1.1	1.02	0.9	0.91	6451200	5634500	6179100	5727800	5074000	5125100	1.14	1	1.1	1.02	0.9	0.91	37	26	26	Carbamidomethylation; TMT10plex	76724	GMP synthase [glutamine-hydrolyzing] OS=Mus musculus OX=10090 GN=Gmps PE=1 SV=2
461	243	O54988	2.07	307.28	2262800	2229800	2145400	2285000	2168800	2298200	1.01	1	0.96	1.02	0.97	1.03	2262800	2229800	2145400	2285000	2168800	2298200	1.01	1	0.96	1.02	0.97	1.03	19	22	20	Carbamidomethylation; TMT10plex	141457	STE20-like serine/threonine-protein kinase OS=Mus musculus OX=10090 GN=Slk PE=1 SV=2
253	291	Q9CZW5	4.16	306.91	5655000	5838900	5666000	5347100	5241100	5020600	0.97	1	0.97	0.92	0.9	0.86	5655000	5838900	5666000	5347100	5241100	5020600	0.97	1	0.97	0.92	0.9	0.86	42	26	26	Carbamidomethylation; TMT10plex	67590	Mitochondrial import receptor subunit TOM70 OS=Mus musculus OX=10090 GN=Tomm70 PE=1 SV=2
291	6703	Q9JLJ2	3.67	306.8	7092900	6688700	6458600	6356500	6028300	6748300	1.06	1	0.97	0.95	0.9	1.01	7092900	6688700	6458600	6356500	6028300	6748300	1.06	1	0.97	0.95	0.9	1.01	43	21	21	Carbamidomethylation; TMT10plex	53515	4-trimethylaminobutyraldehyde dehydrogenase OS=Mus musculus OX=10090 GN=Aldh9a1 PE=1 SV=1
385	2252	Q9WUA2	2.69	306.67	7542500	7178200	7440100	7362700	6830500	7615800	1.05	1	1.04	1.03	0.95	1.06	7542500	7178200	7440100	7362700	6830500	7615800	1.05	1	1.04	1.03	0.95	1.06	40	23	23	Carbamidomethylation; TMT10plex	65697	Phenylalanine--tRNA ligase beta subunit OS=Mus musculus OX=10090 GN=Farsb PE=1 SV=2
89	2287	P14824	4.18	306.41	23337000	23868000	22411000	22319000	21142000	21751000	0.98	1	0.94	0.94	0.89	0.91	23337000	23868000	22411000	22319000	21142000	21751000	0.98	1	0.94	0.94	0.89	0.91	59	43	42	Carbamidomethylation; TMT10plex; Oxidation (M)	75885	Annexin A6 OS=Mus musculus OX=10090 GN=Anxa6 PE=1 SV=3
229	939	Q61598	3.97	306.13	8480700	9032800	7956200	8618700	8170800	8409500	0.94	1	0.88	0.95	0.9	0.93	8480700	9032800	7956200	8618700	8170800	8409500	0.94	1	0.88	0.95	0.9	0.93	49	27	19	Carbamidomethylation; TMT10plex	50537	Rab GDP dissociation inhibitor beta OS=Mus musculus OX=10090 GN=Gdi2 PE=1 SV=1
463	5460	Q9WTM5	7.89	305.84	3128400	2804600	3047700	2978700	2510800	2653700	1.12	1	1.09	1.06	0.9	0.95	3128400	2804600	3047700	2978700	2510800	2653700	1.12	1	1.09	1.06	0.9	0.95	43	20	20	Carbamidomethylation; TMT10plex	51113	RuvB-like 2 OS=Mus musculus OX=10090 GN=Ruvbl2 PE=1 SV=3
299	15704	P60335	23.34	305.4	2066800	2664300	2167900	2270300	1799200	2271900	0.78	1	0.81	0.85	0.68	0.85	2066800	2664300	2167900	2270300	1799200	2271900	0.78	1	0.81	0.85	0.68	0.85	39	13	8	Carbamidomethylation; TMT10plex	37498	Poly(rC)-binding protein 1 OS=Mus musculus OX=10090 GN=Pcbp1 PE=1 SV=1
217	515	Q8BFR5	4.92	305.28	14986000	15020000	14310000	14900000	13092000	13116000	1	1	0.95	0.99	0.87	0.87	14986000	15020000	14310000	14900000	13092000	13116000	1	1	0.95	0.99	0.87	0.87	55	23	23	Carbamidomethylation; TMT10plex	49508	Elongation factor Tu mitochondrial OS=Mus musculus OX=10090 GN=Tufm PE=1 SV=1
153	2392	Q3U1J4	3.62	305.21	9977900	10379000	10059000	10045000	10246000	9024300	0.96	1	0.97	0.97	0.99	0.87	9977900	10379000	10059000	10045000	10246000	9024300	0.96	1	0.97	0.97	0.99	0.87	39	39	39	Carbamidomethylation; TMT10plex	126853	DNA damage-binding protein 1 OS=Mus musculus OX=10090 GN=Ddb1 PE=1 SV=2
403	383	P40124	4.09	304.98	7501000	7649100	7813900	7763500	6935300	7831700	0.98	1	1.02	1.01	0.91	1.02	7501000	7649100	7813900	7763500	6935300	7831700	0.98	1	1.02	1.01	0.91	1.02	36	18	18	Carbamidomethylation; TMT10plex; Oxidation (M)	51565	Adenylyl cyclase-associated protein 1 OS=Mus musculus OX=10090 GN=Cap1 PE=1 SV=4
276	1105	P08226	13.85	304.91	7820700	8919500	9534300	7184100	8774200	7986300	0.88	1	1.07	0.81	0.98	0.9	7820700	8919500	9534300	7184100	8774200	7986300	0.88	1	1.07	0.81	0.98	0.9	48	18	18	TMT10plex; Oxidation (M)	35867	Apolipoprotein E OS=Mus musculus OX=10090 GN=Apoe PE=1 SV=2
183	155	P17751	18.5	304.79	36714000	44553000	38446000	41693000	54026000	43634000	0.82	1	0.86	0.94	1.21	0.98	36714000	44553000	38446000	41693000	54026000	43634000	0.82	1	0.86	0.94	1.21	0.98	51	16	16	Carbamidomethylation; TMT10plex	32192	Triosephosphate isomerase OS=Mus musculus OX=10090 GN=Tpi1 PE=1 SV=4
218	889	P60843	6.47	304.76	6150600	6402300	5499600	5600400	6506200	6447900	0.96	1	0.86	0.87	1.02	1.01	6150600	6402300	5499600	5600400	6506200	6447900	0.96	1	0.86	0.87	1.02	1.01	21	20	8	TMT10plex; Oxidation (M)	46154	Eukaryotic initiation factor 4A-I OS=Mus musculus OX=10090 GN=Eif4a1 PE=1 SV=1
272	82	P05063	4.15	304.68	2731800	2762200	2925000	3082200	2771200	2625700	0.99	1	1.06	1.12	1	0.95	2731800	2762200	2925000	3082200	2771200	2625700	0.99	1	1.06	1.12	1	0.95	47	19	15	Carbamidomethylation; TMT10plex	39395	Fructose-bisphosphate aldolase C OS=Mus musculus OX=10090 GN=Aldoc PE=1 SV=4
145	6423	P40142	5.99	304.61	37945000	34281000	38636000	35691000	35601000	32956000	1.11	1	1.13	1.04	1.04	0.96	37945000	34281000	38636000	35691000	35601000	32956000	1.11	1	1.13	1.04	1.04	0.96	48	29	29	Carbamidomethylation; TMT10plex; Oxidation (M)	67631	Transketolase OS=Mus musculus OX=10090 GN=Tkt PE=1 SV=1
497	162	Q9ERK4	3.7	304.17	5185900	5790500	5484800	5241500	5539700	5620500	0.9	1	0.95	0.91	0.96	0.97	5185900	5790500	5484800	5241500	5539700	5620500	0.9	1	0.95	0.91	0.96	0.97	23	22	22	Carbamidomethylation; TMT10plex; Oxidation (M); Acetylation (Protein N-term)	110455	Exportin-2 OS=Mus musculus OX=10090 GN=Cse1l PE=1 SV=1
308	3155	P46471	2.21	304.09	4251200	3951500	4089900	4185000	3846000	4184300	1.08	1	1.04	1.06	0.97	1.06	4251200	3951500	4089900	4185000	3846000	4184300	1.08	1	1.04	1.06	0.97	1.06	58	22	22	Carbamidomethylation; TMT10plex; Oxidation (M)	48648	26S proteasome regulatory subunit 7 OS=Mus musculus OX=10090 GN=Psmc2 PE=1 SV=5
412	612	P14685	6.51	303.8	6922600	6820900	7102600	7174400	5999200	6789500	1.01	1	1.04	1.05	0.88	1	6922600	6820900	7102600	7174400	5999200	6789500	1.01	1	1.04	1.05	0.88	1	45	24	24	TMT10plex	60718	26S proteasome non-ATPase regulatory subunit 3 OS=Mus musculus OX=10090 GN=Psmd3 PE=1 SV=3
419	3835	P32921	54.69	303.67	2547200	2423200	2599500	2359400	4614000	2483600	1.05	1	1.07	0.97	1.9	1.02	2547200	2423200	2599500	2359400	4614000	2483600	1.05	1	1.07	0.97	1.9	1.02	39	21	21	Carbamidomethylation; TMT10plex	54358	Tryptophan--tRNA ligase cytoplasmic OS=Mus musculus OX=10090 GN=Wars1 PE=1 SV=2
182	410	Q61696	40.83	303.51	1157000	1351000	1113300	1001200	1921400	970240	0.86	1	0.82	0.74	1.42	0.72	1157000	1351000	1113300	1001200	1921400	970240	0.86	1	0.82	0.74	1.42	0.72	20	20	10	Carbamidomethylation; TMT10plex	70079	Heat shock 70 kDa protein 1A OS=Mus musculus OX=10090 GN=Hspa1a PE=1 SV=2
182	411	P17879	40.83	303.51	1157000	1351000	1113300	1001200	1921400	970240	0.86	1	0.82	0.74	1.42	0.72	1157000	1351000	1113300	1001200	1921400	970240	0.86	1	0.82	0.74	1.42	0.72	20	20	10	Carbamidomethylation; TMT10plex	70176	Heat shock 70 kDa protein 1B OS=Mus musculus OX=10090 GN=Hspa1b PE=1 SV=3
227	859	P29341	11.02	303.5	12727000	12941000	13492000	11105000	10576000	10794000	0.98	1	1.04	0.86	0.82	0.83	12727000	12941000	13492000	11105000	10576000	10794000	0.98	1	1.04	0.86	0.82	0.83	33	23	23	Carbamidomethylation; TMT10plex; Oxidation (M)	70671	Polyadenylate-binding protein 1 OS=Mus musculus OX=10090 GN=Pabpc1 PE=1 SV=2
337	4167	Q07797	5.18	302.66	8134100	8140800	9156600	7937500	8972800	8240400	1	1	1.12	0.98	1.1	1.01	8134100	8140800	9156600	7937500	8972800	8240400	1	1	1.12	0.98	1.1	1.01	39	16	16	Carbamidomethylation; TMT10plex; Oxidation (M)	64491	Galectin-3-binding protein OS=Mus musculus OX=10090 GN=Lgals3bp PE=1 SV=1
378	185	P10852	32.05	302.58	12102000	10985000	14339000	10364000	8923500	10712000	1.1	1	1.31	0.94	0.81	0.98	12102000	10985000	14339000	10364000	8923500	10712000	1.1	1	1.31	0.94	0.81	0.98	34	17	17	TMT10plex	58337	4F2 cell-surface antigen heavy chain OS=Mus musculus OX=10090 GN=Slc3a2 PE=1 SV=1
262	113	O89001	7.84	302.37	4543700	4359700	4281100	3990100	5191800	4119100	1.04	1	0.98	0.92	1.19	0.94	4543700	4359700	4281100	3990100	5191800	4119100	1.04	1	0.98	0.92	1.19	0.94	21	28	28	Carbamidomethylation; TMT10plex	152405	Carboxypeptidase D OS=Mus musculus OX=10090 GN=Cpd PE=1 SV=2
499	2051	Q9DB77	4.64	302.04	10062000	10537000	9732400	10059000	11050000	8959500	0.95	1	0.92	0.95	1.05	0.85	10062000	10537000	9732400	10059000	11050000	8959500	0.95	1	0.92	0.95	1.05	0.85	35	15	15	Carbamidomethylation; TMT10plex	48235	Cytochrome b-c1 complex subunit 2 mitochondrial OS=Mus musculus OX=10090 GN=Uqcrc2 PE=1 SV=1
209	581	Q64514	3.01	302.01	5725800	5787900	5721900	5254500	6018300	5390500	0.99	1	0.99	0.91	1.04	0.93	5725800	5787900	5721900	5254500	6018300	5390500	0.99	1	0.99	0.91	1.04	0.93	28	30	30	Carbamidomethylation; TMT10plex	139878	Tripeptidyl-peptidase 2 OS=Mus musculus OX=10090 GN=Tpp2 PE=1 SV=3
280	7002	P68040	11.94	301.8	7653400	8136000	7441400	7418400	9620400	7430000	0.94	1	0.91	0.91	1.18	0.91	7653400	8136000	7441400	7418400	9620400	7430000	0.94	1	0.91	0.91	1.18	0.91	65	19	19	Carbamidomethylation; TMT10plex	35077	Receptor of activated protein C kinase 1 OS=Mus musculus OX=10090 GN=Rack1 PE=1 SV=3
286	821	Q8K1M6	9.74	300.97	5607800	5816200	5543300	5064500	4648500	5099700	0.96	1	0.95	0.87	0.8	0.88	5607800	5816200	5543300	5064500	4648500	5099700	0.96	1	0.95	0.87	0.8	0.88	43	28	28	Carbamidomethylation; TMT10plex; Oxidation (M)	82658	Dynamin-1-like protein OS=Mus musculus OX=10090 GN=Dnm1l PE=1 SV=2
293	1522	Q9R0Q1	5.96	300.96	6259600	6120500	6248500	5962900	5756900	5332800	1.02	1	1.02	0.97	0.94	0.87	6259600	6120500	6248500	5962900	5756900	5332800	1.02	1	1.02	0.97	0.94	0.87	39	25	24	Carbamidomethylation; TMT10plex	76022	Synaptotagmin-like protein 4 OS=Mus musculus OX=10090 GN=Sytl4 PE=1 SV=1
546	3441	P60122	6.35	300.59	4098900	4340200	4093400	4150200	3676800	3948800	0.94	1	0.94	0.96	0.85	0.91	4098900	4340200	4093400	4150200	3676800	3948800	0.94	1	0.94	0.96	0.85	0.91	42	17	17	Carbamidomethylation; TMT10plex	50214	RuvB-like 1 OS=Mus musculus OX=10090 GN=Ruvbl1 PE=1 SV=1
292	984	Q8R1B4	4.25	300.47	10652000	10264000	9823600	9508600	9076700	9160000	1.04	1	0.96	0.93	0.88	0.89	10652000	10264000	9823600	9508600	9076700	9160000	1.04	1	0.96	0.93	0.88	0.89	31	29	29	Carbamidomethylation; TMT10plex	105531	Eukaryotic translation initiation factor 3 subunit C OS=Mus musculus OX=10090 GN=Eif3c PE=1 SV=1
181	2172	Q8VDM4	2.33	300.23	9122200	9051200	8882500	8629100	8390300	9038000	1.01	1	0.98	0.95	0.93	1	9122200	9051200	8882500	8629100	8390300	9038000	1.01	1	0.98	0.95	0.93	1	37	29	29	Carbamidomethylation; TMT10plex	100203	26S proteasome non-ATPase regulatory subunit 2 OS=Mus musculus OX=10090 GN=Psmd2 PE=1 SV=1
93	23	P68254	3.35	300.22	6153300	5974800	5933800	6442200	5395100	6013600	1.03	1	0.99	1.08	0.9	1.01	6153300	5974800	5933800	6442200	5395100	6013600	1.03	1	0.99	1.08	0.9	1.01	55	18	13	Carbamidomethylation; TMT10plex; Oxidation (M)	27778	14-3-3 protein theta OS=Mus musculus OX=10090 GN=Ywhaq PE=1 SV=1
418	1528	P50544	5.14	300.16	3830500	4147400	3585500	3643100	3818900	3958600	0.92	1	0.86	0.88	0.92	0.95	3830500	4147400	3585500	3643100	3818900	3958600	0.92	1	0.86	0.88	0.92	0.95	47	24	24	Carbamidomethylation; TMT10plex	70876	Very long-chain specific acyl-CoA dehydrogenase mitochondrial OS=Mus musculus OX=10090 GN=Acadvl PE=1 SV=3
163	15684	O88685	3.9	300.06	5371000	5091100	5167500	5307100	4606200	4722700	1.05	1	1.01	1.04	0.9	0.93	5371000	5091100	5167500	5307100	4606200	4722700	1.05	1	1.01	1.04	0.9	0.93	68	24	24	Carbamidomethylation; TMT10plex; Oxidation (M)	49549	26S proteasome regulatory subunit 6A OS=Mus musculus OX=10090 GN=Psmc3 PE=1 SV=2
467	4166	Q9EP69	5.25	299.88	6190700	7151900	6529800	6314800	6560500	5887700	0.87	1	0.91	0.88	0.92	0.82	6190700	7151900	6529800	6314800	6560500	5887700	0.87	1	0.91	0.88	0.92	0.82	35	22	22	Carbamidomethylation; TMT10plex	66944	Phosphatidylinositide phosphatase SAC1 OS=Mus musculus OX=10090 GN=Sacm1l PE=1 SV=1
455	1221	Q6PHZ2	9.39	299.82	2501800	2135200	2041800	1988100	2513700	1972200	1.17	1	0.96	0.93	1.18	0.92	2501800	2135200	2041800	1988100	2513700	1972200	1.17	1	0.96	0.93	1.18	0.92	29	19	14	Carbamidomethylation; TMT10plex; Oxidation (M)	56369	Calcium/calmodulin-dependent protein kinase type II subunit delta OS=Mus musculus OX=10090 GN=Camk2d PE=1 SV=1
264	2561	Q61990	7.61	299.76	2329300	2309100	2028300	2258200	1911900	1988700	1.01	1	0.88	0.98	0.83	0.86	2329300	2309100	2028300	2258200	1911900	1988700	1.01	1	0.88	0.98	0.83	0.86	20	12	5	Carbamidomethylation; TMT10plex	38222	Poly(rC)-binding protein 2 OS=Mus musculus OX=10090 GN=Pcbp2 PE=1 SV=1
364	7341	Q8K009	6.41	299.64	4314700	4258000	4354900	4058100	3684900	4407900	1.01	1	1.02	0.95	0.87	1.04	4314700	4258000	4354900	4058100	3684900	4407900	1.01	1	1.02	0.95	0.87	1.04	39	28	27	Carbamidomethylation; TMT10plex	101590	Mitochondrial 10-formyltetrahydrofolate dehydrogenase OS=Mus musculus OX=10090 GN=Aldh1l2 PE=1 SV=2
609	527	Q6PB93	3.24	299.14	1835700	1863000	1754100	1762800	1937200	1734400	0.99	1	0.94	0.95	1.04	0.93	1835700	1863000	1754100	1762800	1937200	1734400	0.99	1	0.94	0.95	1.04	0.93	42	21	21	Carbamidomethylation; TMT10plex	64515	Polypeptide N-acetylgalactosaminyltransferase 2 OS=Mus musculus OX=10090 GN=Galnt2 PE=1 SV=1
359	135	Q9ER72	8.6	299.02	3797800	3691700	4103300	3602300	3958700	3340700	1.03	1	1.11	0.98	1.07	0.9	3797800	3691700	4103300	3602300	3958700	3340700	1.03	1	1.11	0.98	1.07	0.9	28	25	25	Carbamidomethylation; TMT10plex	94860	Cysteine--tRNA ligase cytoplasmic OS=Mus musculus OX=10090 GN=Cars1 PE=1 SV=2
261	583	Q9Z1G4	14.21	298.71	5835300	6748000	6313700	5091800	6784000	4734500	0.86	1	0.94	0.75	1.01	0.7	5835300	6748000	6313700	5091800	6784000	4734500	0.86	1	0.94	0.75	1.01	0.7	27	24	23	Carbamidomethylation; TMT10plex; Oxidation (M)	96467	V-type proton ATPase 116 kDa subunit a isoform 1 OS=Mus musculus OX=10090 GN=Atp6v0a1 PE=1 SV=3
642	15711	Q9DBL1	6.36	298.54	1786900	1905400	1844100	1804700	2031100	2177300	0.94	1	0.97	0.95	1.07	1.14	1786900	1905400	1844100	1804700	2031100	2177300	0.94	1	0.97	0.95	1.07	1.14	40	15	15	Carbamidomethylation; TMT10plex	47874	Short/branched chain specific acyl-CoA dehydrogenase mitochondrial OS=Mus musculus OX=10090 GN=Acadsb PE=1 SV=1
361	9720	P50247	3.91	298.54	9199300	9224900	8221300	8315300	8532400	8331400	1	1	0.89	0.9	0.92	0.9	9199300	9224900	8221300	8315300	8532400	8331400	1	1	0.89	0.9	0.92	0.9	48	21	19	Carbamidomethylation; TMT10plex; Oxidation (M)	47688	Adenosylhomocysteinase OS=Mus musculus OX=10090 GN=Ahcy PE=1 SV=3
172	399	Q9CZU6	3.71	298.51	25655000	25674000	22989000	23141000	23625000	24091000	1	1	0.9	0.9	0.92	0.94	25655000	25674000	22989000	23141000	23625000	24091000	1	1	0.9	0.9	0.92	0.94	44	19	19	Carbamidomethylation; TMT10plex; Oxidation (M)	51737	Citrate synthase mitochondrial OS=Mus musculus OX=10090 GN=Cs PE=1 SV=1
486	4003	Q80U28	1.28	298.44	1548700	1544500	1561800	1487300	1554800	1525700	1	1	1.01	0.96	1.01	0.99	1548700	1544500	1561800	1487300	1554800	1525700	1	1	1.01	0.96	1.01	0.99	19	24	24	Carbamidomethylation; TMT10plex	175179	MAP kinase-activating death domain protein OS=Mus musculus OX=10090 GN=Madd PE=1 SV=2
233	227	Q8BX70	5.45	298.3	2199900	2245000	2280300	2381700	1965800	2172100	0.98	1	1.02	1.06	0.88	0.97	2199900	2245000	2280300	2381700	1965800	2172100	0.98	1	1.02	1.06	0.88	0.97	12	36	36	Carbamidomethylation; TMT10plex	420092	Vacuolar protein sorting-associated protein 13C OS=Mus musculus OX=10090 GN=Vps13c PE=1 SV=2
250	907	Q8CG48	10.63	298.13	3938600	3866400	3500900	3336200	3048400	3397400	1.02	1	0.91	0.86	0.79	0.88	3938600	3866400	3500900	3336200	3048400	3397400	1.02	1	0.91	0.86	0.79	0.88	30	36	36	Carbamidomethylation; TMT10plex	134239	Structural maintenance of chromosomes protein 2 OS=Mus musculus OX=10090 GN=Smc2 PE=1 SV=2
371	777	P67778	2.29	297.91	9401900	9875400	9278200	9164500	9201400	9345800	0.95	1	0.94	0.93	0.93	0.95	9401900	9875400	9278200	9164500	9201400	9345800	0.95	1	0.94	0.93	0.93	0.95	68	17	17	TMT10plex	29820	Prohibitin OS=Mus musculus OX=10090 GN=Phb PE=1 SV=1
256	522	P63011	6.86	297.88	11718000	9970100	10790000	9951500	9054600	10234000	1.18	1	1.08	1	0.91	1.03	11718000	9970100	10790000	9951500	9054600	10234000	1.18	1	1.08	1	0.91	1.03	41	14	8	Carbamidomethylation; TMT10plex; Oxidation (M)	24970	Ras-related protein Rab-3A OS=Mus musculus OX=10090 GN=Rab3a PE=1 SV=1
522	2648	Q99MR8	5.43	297.73	1562900	1462700	1487200	1337900	1440200	1326500	1.07	1	1.02	0.91	0.98	0.91	1562900	1462700	1487200	1337900	1440200	1326500	1.07	1	1.02	0.91	0.98	0.91	35	22	22	Carbamidomethylation; TMT10plex	79344	Methylcrotonoyl-CoA carboxylase subunit alpha mitochondrial OS=Mus musculus OX=10090 GN=Mccc1 PE=1 SV=2
458	1717	Q8QZY1	7.29	297.64	3713300	3779000	3467200	3834400	3767900	4164300	0.98	1	0.92	1.01	1	1.1	3713300	3779000	3467200	3834400	3767900	4164300	0.98	1	0.92	1.01	1	1.1	35	21	21	Carbamidomethylation; TMT10plex	66613	Eukaryotic translation initiation factor 3 subunit L OS=Mus musculus OX=10090 GN=Eif3l PE=1 SV=1
710	2879	P16332	7.76	297	4247300	4147100	4192600	3667300	3462300	3903900	1.02	1	1.01	0.88	0.83	0.94	4247300	4147100	4192600	3667300	3462300	3903900	1.02	1	1.01	0.88	0.83	0.94	29	18	18	Carbamidomethylation; TMT10plex	82844	Methylmalonyl-CoA mutase mitochondrial OS=Mus musculus OX=10090 GN=Mmut PE=1 SV=2
532	1769	Q80X50	4.82	296.24	2114300	2178200	2271300	1965100	2303800	2066900	0.97	1	1.04	0.9	1.06	0.95	2114300	2178200	2271300	1965100	2303800	2066900	0.97	1	1.04	0.9	1.06	0.95	22	19	19	Carbamidomethylation; TMT10plex; Oxidation (M)	116799	Ubiquitin-associated protein 2-like OS=Mus musculus OX=10090 GN=Ubap2l PE=1 SV=1
255	1869	Q9WU78	9.34	296.16	4279000	4568000	4813400	4258300	3871800	4282000	0.94	1	1.05	0.93	0.85	0.94	4279000	4568000	4813400	4258300	3871800	4282000	0.94	1	1.05	0.93	0.85	0.94	34	28	28	Carbamidomethylation; TMT10plex	96024	Programmed cell death 6-interacting protein OS=Mus musculus OX=10090 GN=Pdcd6ip PE=1 SV=3
221	3817	Q60930	12.4	295.85	7032900	6291400	5404600	6358900	5715000	5953200	1.12	1	0.86	1.01	0.91	0.95	7032900	6291400	5404600	6358900	5715000	5953200	1.12	1	0.86	1.01	0.91	0.95	63	15	15	Carbamidomethylation; TMT10plex	31733	Voltage-dependent anion-selective channel protein 2 OS=Mus musculus OX=10090 GN=Vdac2 PE=1 SV=2
383	704	Q8BVI4	5.63	295.75	10773000	10682000	10295000	10730000	9175700	9779900	1.01	1	0.96	1	0.86	0.92	10773000	10682000	10295000	10730000	9175700	9779900	1.01	1	0.96	1	0.86	0.92	61	14	14	Carbamidomethylation; TMT10plex; Oxidation (M)	25570	Dihydropteridine reductase OS=Mus musculus OX=10090 GN=Qdpr PE=1 SV=2
212	1250	P97807	6.31	295.69	19789000	20245000	18453000	18502000	17162000	17487000	0.98	1	0.91	0.91	0.85	0.86	19789000	20245000	18453000	18502000	17162000	17487000	0.98	1	0.91	0.91	0.85	0.86	52	24	24	Carbamidomethylation; TMT10plex; Oxidation (M)	54357	Fumarate hydratase mitochondrial OS=Mus musculus OX=10090 GN=Fh PE=1 SV=3
654	15699	P62715	3.77	295.62	176060	207450	222490	142850	588160	242560	0.85	1	1.07	0.69	2.84	1.17	176060	207450	222490	142850	588160	242560	0.85	1	1.07	0.69	2.84	1.17	4	16	1	Carbamidomethylation; TMT10plex	35575	Serine/threonine-protein phosphatase 2A catalytic subunit beta isoform OS=Mus musculus OX=10090 GN=Ppp2cb PE=1 SV=1
270	234	Q8K2B3	2.89	295.43	23564000	21902000	21933000	22327000	23978000	23107000	1.08	1	1	1.02	1.09	1.06	23564000	21902000	21933000	22327000	23978000	23107000	1.08	1	1	1.02	1.09	1.06	32	21	21	Carbamidomethylation; TMT10plex	72585	Succinate dehydrogenase [ubiquinone] flavoprotein subunit mitochondrial OS=Mus musculus OX=10090 GN=Sdha PE=1 SV=1
478	3220	O88935	6.19	295.4	3891500	3949900	4150800	3755800	3643100	3526800	0.99	1	1.05	0.95	0.92	0.89	3891500	3949900	4150800	3755800	3643100	3526800	0.99	1	1.05	0.95	0.92	0.89	24	18	14	TMT10plex	74097	Synapsin-1 OS=Mus musculus OX=10090 GN=Syn1 PE=1 SV=2
310	1454	Q9Z2V5	1.11	295.09	6288900	6059500	6051200	6042100	6132000	6291000	1.04	1	1	1	1.01	1.04	6288900	6059500	6051200	6042100	6132000	6291000	1.04	1	1	1	1.01	1.04	21	20	20	Carbamidomethylation; TMT10plex	125787	Histone deacetylase 6 OS=Mus musculus OX=10090 GN=Hdac6 PE=1 SV=3
756	2441	O54692	8.74	294.81	1257600	1311300	1110600	1042200	1124300	1198900	0.96	1	0.85	0.79	0.86	0.91	1257600	1311300	1110600	1042200	1124300	1198900	0.96	1	0.85	0.79	0.86	0.91	25	17	17	Carbamidomethylation; TMT10plex	88063	Centromere/kinetochore protein zw10 homolog OS=Mus musculus OX=10090 GN=Zw10 PE=1 SV=3
294	801	P12382	8.94	294.67	4254500	4105100	4542900	4398800	4690100	3677700	1.04	1	1.11	1.07	1.14	0.9	4254500	4105100	4542900	4398800	4690100	3677700	1.04	1	1.11	1.07	1.14	0.9	27	24	18	Carbamidomethylation; TMT10plex	85360	ATP-dependent 6-phosphofructokinase liver type OS=Mus musculus OX=10090 GN=Pfkl PE=1 SV=4
354	1138	Q9JME5	2.72	294.67	4116700	3832800	3999500	4004600	3668800	4202600	1.07	1	1.04	1.04	0.96	1.1	4116700	3832800	3999500	4004600	3668800	4202600	1.07	1	1.04	1.04	0.96	1.1	25	30	23	Carbamidomethylation; TMT10plex	119192	AP-3 complex subunit beta-2 OS=Mus musculus OX=10090 GN=Ap3b2 PE=1 SV=2
508	974	Q8BMF4	13.56	294.44	6254800	6071500	6920300	5717700	5234700	6072800	1.03	1	1.14	0.94	0.86	1	6254800	6071500	6920300	5717700	5234700	6072800	1.03	1	1.14	0.94	0.86	1	30	18	18	Carbamidomethylation; TMT10plex	67942	Dihydrolipoyllysine-residue acetyltransferase component of pyruvate dehydrogenase complex mitochondrial OS=Mus musculus OX=10090 GN=Dlat PE=1 SV=2
505	5161	Q9Z110	6.78	294.42	3666900	3783600	3355400	3879900	3179700	3623000	0.97	1	0.89	1.03	0.84	0.96	3666900	3783600	3355400	3879900	3179700	3623000	0.97	1	0.89	1.03	0.84	0.96	35	23	23	Carbamidomethylation; TMT10plex	87266	Delta-1-pyrroline-5-carboxylate synthase OS=Mus musculus OX=10090 GN=Aldh18a1 PE=1 SV=2
531	5377	Q8VDW0	21.55	294.33	1357400	1173100	1401400	1258000	964170	1196500	1.16	1	1.19	1.07	0.82	1.02	1357400	1173100	1401400	1258000	964170	1196500	1.16	1	1.19	1.07	0.82	1.02	23	15	8	Carbamidomethylation; TMT10plex	49067	ATP-dependent RNA helicase DDX39A OS=Mus musculus OX=10090 GN=Ddx39a PE=1 SV=1
391	1790	A2A5R2	4.91	294.16	1731900	1693500	1726800	1613000	1505500	1519000	1.02	1	1.02	0.95	0.89	0.9	1731900	1693500	1726800	1613000	1505500	1519000	1.02	1	1.02	0.95	0.89	0.9	10	26	15	Carbamidomethylation; TMT10plex	202238	Brefeldin A-inhibited guanine nucleotide-exchange protein 2 OS=Mus musculus OX=10090 GN=Arfgef2 PE=1 SV=1
381	10028	O08529	9.52	294.1	2097700	2297400	2036200	1820800	2327000	2027900	0.91	1	0.89	0.79	1.01	0.88	2097700	2297400	2036200	1820800	2327000	2027900	0.91	1	0.89	0.79	1.01	0.88	33	22	22	Carbamidomethylation; TMT10plex	79872	Calpain-2 catalytic subunit OS=Mus musculus OX=10090 GN=Capn2 PE=1 SV=4
275	90	Q9D1G1	11.21	293.93	5799100	5998600	5395700	5411900	4688700	6052700	0.97	1	0.9	0.9	0.78	1.01	5799100	5998600	5395700	5411900	4688700	6052700	0.97	1	0.9	0.9	0.78	1.01	35	13	6	TMT10plex; Oxidation (M); Acetylation (Protein N-term)	22187	Ras-related protein Rab-1B OS=Mus musculus OX=10090 GN=Rab1b PE=1 SV=1
623	15695	P63330	5.47	293.75	755090	821810	711260	659240	1196200	819550	0.92	1	0.87	0.8	1.46	1	755090	821810	711260	659240	1196200	819550	0.92	1	0.87	0.8	1.46	1	7	17	2	Carbamidomethylation; TMT10plex	35608	Serine/threonine-protein phosphatase 2A catalytic subunit alpha isoform OS=Mus musculus OX=10090 GN=Ppp2ca PE=1 SV=1
139	1879	P47867	22.71	293.72	20081000	19854000	22176000	25702000	29210000	29969000	1.01	1	1.12	1.29	1.47	1.51	20081000	19854000	22176000	25702000	29210000	29969000	1.01	1	1.12	1.29	1.47	1.51	59	27	27	TMT10plex; Oxidation (M)	53326	Secretogranin-3 OS=Mus musculus OX=10090 GN=Scg3 PE=1 SV=1
365	7058	Q9DBE8	8.4	293.41	3911700	4185400	3909400	3901900	4786300	3876800	0.93	1	0.93	0.93	1.14	0.93	3911700	4185400	3909400	3901900	4786300	3876800	0.93	1	0.93	0.93	1.14	0.93	47	18	18	Carbamidomethylation; TMT10plex; Oxidation (M)	47405	Alpha-1 3/1 6-mannosyltransferase ALG2 OS=Mus musculus OX=10090 GN=Alg2 PE=1 SV=2
175	91	Q9CU62	5.44	293.39	4641300	4626600	4492600	4376500	3989800	4319900	1	1	0.97	0.95	0.86	0.93	4641300	4626600	4492600	4376500	3989800	4319900	1	1	0.97	0.95	0.86	0.93	35	40	40	Carbamidomethylation; TMT10plex	143235	Structural maintenance of chromosomes protein 1A OS=Mus musculus OX=10090 GN=Smc1a PE=1 SV=4
372	131	Q922J3	6.62	293.33	1762900	1737300	2066300	1903300	1755200	1919800	1.01	1	1.19	1.1	1.01	1.11	1762900	1737300	2066300	1903300	1755200	1919800	1.01	1	1.19	1.1	1.01	1.11	21	27	25	Carbamidomethylation; TMT10plex	155813	CAP-Gly domain-containing linker protein 1 OS=Mus musculus OX=10090 GN=Clip1 PE=1 SV=1
556	102	Q8BRT1	1.9	293.02	1164700	1141100	1099700	1126900	1106000	1039100	1.02	1	0.96	0.99	0.97	0.91	1164700	1141100	1099700	1126900	1106000	1039100	1.02	1	0.96	0.99	0.97	0.91	18	23	19	Carbamidomethylation; TMT10plex	140738	CLIP-associating protein 2 OS=Mus musculus OX=10090 GN=Clasp2 PE=1 SV=1
428	1188	Q99LC3	7.62	292.74	5825300	5724200	5994400	5329800	5659600	4962400	1.02	1	1.05	0.93	0.99	0.87	5825300	5724200	5994400	5329800	5659600	4962400	1.02	1	1.05	0.93	0.99	0.87	47	17	17	Carbamidomethylation; TMT10plex; Oxidation (M)	40603	NADH dehydrogenase [ubiquinone] 1 alpha subcomplex subunit 10 mitochondrial OS=Mus musculus OX=10090 GN=Ndufa10 PE=1 SV=1
312	2754	Q91YW3	7.89	292.74	11628000	12703000	10466000	11200000	11294000	12496000	0.92	1	0.82	0.88	0.89	0.98	11628000	12703000	10466000	11200000	11294000	12496000	0.92	1	0.82	0.88	0.89	0.98	54	29	29	Carbamidomethylation; TMT10plex	57464	DnaJ homolog subfamily C member 3 OS=Mus musculus OX=10090 GN=Dnajc3 PE=1 SV=1
627	669	O55201	9.23	292.55	1219500	1359500	1317400	1261300	1095400	1358000	0.9	1	0.97	0.93	0.81	1	1219500	1359500	1317400	1261300	1095400	1358000	0.9	1	0.97	0.93	0.81	1	22	19	19	Carbamidomethylation; TMT10plex	120664	Transcription elongation factor SPT5 OS=Mus musculus OX=10090 GN=Supt5h PE=1 SV=1
692	3454	P70399	72.91	292.44	486050	452300	493780	524390	962460	399820	1.07	1	1.09	1.16	2.13	0.88	486050	452300	493780	524390	962460	399820	1.07	1	1.09	1.16	2.13	0.88	14	18	18	Carbamidomethylation; TMT10plex	212733	TP53-binding protein 1 OS=Mus musculus OX=10090 GN=Tp53bp1 PE=1 SV=3
396	1270	Q91W50	6.79	292.34	4790600	4877100	4608700	4550600	4097800	4365700	0.98	1	0.94	0.93	0.84	0.9	4790600	4877100	4608700	4550600	4097800	4365700	0.98	1	0.94	0.93	0.84	0.9	30	22	22	Carbamidomethylation; TMT10plex	88791	Cold shock domain-containing protein E1 OS=Mus musculus OX=10090 GN=Csde1 PE=1 SV=1
648	7866	Q8BP92	68.68	292.16	1861300	1172900	2012200	1973200	2435800	2710100	1.59	1	1.72	1.68	2.08	2.31	1861300	1172900	2012200	1973200	2435800	2710100	1.59	1	1.72	1.68	2.08	2.31	38	11	10	TMT10plex	37271	Reticulocalbin-2 OS=Mus musculus OX=10090 GN=Rcn2 PE=1 SV=1
341	199	Q61879	8.17	292.05	990160	944670	1015900	793340	953510	1002900	1.05	1	1.08	0.84	1.01	1.06	990160	944670	1015900	793340	953510	1002900	1.05	1	1.08	0.84	1.01	1.06	13	28	19	Carbamidomethylation; TMT10plex	228994	Myosin-10 OS=Mus musculus OX=10090 GN=Myh10 PE=1 SV=2
544	1240	Q9D051	10.97	291.75	5544300	5436800	5630900	5074300	4417200	5250100	1.02	1	1.04	0.93	0.81	0.97	5544300	5436800	5630900	5074300	4417200	5250100	1.02	1	1.04	0.93	0.81	0.97	46	14	14	Carbamidomethylation; TMT10plex; Oxidation (M)	38937	Pyruvate dehydrogenase E1 component subunit beta mitochondrial OS=Mus musculus OX=10090 GN=Pdhb PE=1 SV=1
406	313	Q9DC69	6.33	291.68	8448800	9329800	7906800	7927800	9074000	9079600	0.91	1	0.85	0.85	0.97	0.97	8448800	9329800	7906800	7927800	9074000	9079600	0.91	1	0.85	0.85	0.97	0.97	49	19	19	Carbamidomethylation; TMT10plex; Oxidation (M)	42525	NADH dehydrogenase [ubiquinone] 1 alpha subcomplex subunit 9 mitochondrial OS=Mus musculus OX=10090 GN=Ndufa9 PE=1 SV=2
283	1334	Q6A026	4.8	291.64	1882300	2201800	2038500	2008800	1985900	2000700	0.85	1	0.93	0.91	0.9	0.91	1882300	2201800	2038500	2008800	1985900	2000700	0.85	1	0.93	0.91	0.9	0.91	24	33	26	Carbamidomethylation; TMT10plex	150327	Sister chromatid cohesion protein PDS5 homolog A OS=Mus musculus OX=10090 GN=Pds5a PE=1 SV=3
266	235	Q8CG47	14.45	291.53	2050000	2070800	1871300	1766600	1548100	1843900	0.99	1	0.9	0.85	0.75	0.89	2050000	2070800	1871300	1766600	1548100	1843900	0.99	1	0.9	0.85	0.75	0.89	24	31	31	Carbamidomethylation; TMT10plex	146894	Structural maintenance of chromosomes protein 4 OS=Mus musculus OX=10090 GN=Smc4 PE=1 SV=1
525	4649	D3Z7P3	7.79	291.45	2821600	2815700	2887600	2636600	2667400	2383100	1	1	1.03	0.94	0.95	0.85	2821600	2815700	2887600	2636600	2667400	2383100	1	1	1.03	0.94	0.95	0.85	33	19	18	Carbamidomethylation; TMT10plex	73964	Glutaminase kidney isoform mitochondrial OS=Mus musculus OX=10090 GN=Gls PE=1 SV=1
417	1646	Q9Z1N5	7.77	291.18	2738500	2997300	2644100	2455500	2734800	2660800	0.91	1	0.88	0.82	0.91	0.89	2738500	2997300	2644100	2455500	2734800	2660800	0.91	1	0.88	0.82	0.91	0.89	25	16	9	Carbamidomethylation; TMT10plex	49035	Spliceosome RNA helicase Ddx39b OS=Mus musculus OX=10090 GN=Ddx39b PE=1 SV=1
329	1252	P26638	2.73	291.01	13993000	14056000	14559000	14535000	15325000	15246000	1	1	1.04	1.03	1.09	1.08	13993000	14056000	14559000	14535000	15325000	15246000	1	1	1.04	1.03	1.09	1.08	45	21	21	Carbamidomethylation; TMT10plex; Oxidation (M)	58389	Serine--tRNA ligase cytoplasmic OS=Mus musculus OX=10090 GN=Sars1 PE=1 SV=3
527	5269	P62196	6.12	290.95	2257700	2587100	2173400	2357600	2268600	2421900	0.87	1	0.84	0.91	0.88	0.94	2257700	2587100	2173400	2357600	2268600	2421900	0.87	1	0.84	0.91	0.88	0.94	52	20	18	Carbamidomethylation; TMT10plex; Oxidation (M)	45626	26S proteasome regulatory subunit 8 OS=Mus musculus OX=10090 GN=Psmc5 PE=1 SV=1
279	9838	P62962	8.55	290.88	20977000	23117000	18836000	19973000	20491000	17696000	0.91	1	0.81	0.86	0.89	0.77	20977000	23117000	18836000	19973000	20491000	17696000	0.91	1	0.81	0.86	0.89	0.77	79	13	13	Carbamidomethylation; TMT10plex; Oxidation (M)	14957	Profilin-1 OS=Mus musculus OX=10090 GN=Pfn1 PE=1 SV=2
188	34	Q9D0K2	10.52	290.87	17053000	17779000	16274000	15607000	14041000	14690000	0.96	1	0.92	0.88	0.79	0.83	17053000	17779000	16274000	15607000	14041000	14690000	0.96	1	0.92	0.88	0.79	0.83	48	20	20	Carbamidomethylation; TMT10plex; Oxidation (M)	55989	Succinyl-CoA:3-ketoacid coenzyme A transferase 1 mitochondrial OS=Mus musculus OX=10090 GN=Oxct1 PE=1 SV=1
636	4095	P27612	3.14	290.62	4060200	3894600	3685600	3809100	3556900	3704000	1.04	1	0.95	0.98	0.91	0.95	4060200	3894600	3685600	3809100	3556900	3704000	1.04	1	0.95	0.98	0.91	0.95	27	18	18	Carbamidomethylation; TMT10plex	87221	Phospholipase A-2-activating protein OS=Mus musculus OX=10090 GN=Plaa PE=1 SV=4
220	4273	Q60931	14.07	290.46	3232300	2969400	2456300	2440100	2230800	2417300	1.09	1	0.83	0.82	0.75	0.81	3232300	2969400	2456300	2440100	2230800	2417300	1.09	1	0.83	0.82	0.75	0.81	58	16	15	Carbamidomethylation; TMT10plex; Acetylation (Protein N-term)	30753	Voltage-dependent anion-selective channel protein 3 OS=Mus musculus OX=10090 GN=Vdac3 PE=1 SV=1
537	6773	Q9Z0N1	8.74	289.79	7726200	8694200	7596900	7985900	9353300	7053200	0.89	1	0.87	0.92	1.08	0.81	7726200	8694200	7596900	7985900	9353300	7053200	0.89	1	0.87	0.92	1.08	0.81	48	20	20	Carbamidomethylation; TMT10plex	51066	Eukaryotic translation initiation factor 2 subunit 3 X-linked OS=Mus musculus OX=10090 GN=Eif2s3x PE=1 SV=2
543	3399	Q9DCD0	5.4	289.62	8005800	7409900	8585700	8054000	8136000	8384300	1.08	1	1.16	1.09	1.1	1.13	8005800	7409900	8585700	8054000	8136000	8384300	1.08	1	1.16	1.09	1.1	1.13	31	15	15	Carbamidomethylation; TMT10plex	53247	6-phosphogluconate dehydrogenase decarboxylating OS=Mus musculus OX=10090 GN=Pgd PE=1 SV=3
379	1000	Q8JZQ2	3.89	289.62	2781500	2833000	2825600	2741200	2525700	2655800	0.98	1	1	0.97	0.89	0.94	2781500	2833000	2825600	2741200	2525700	2655800	0.98	1	1	0.97	0.89	0.94	25	26	22	Carbamidomethylation; TMT10plex	89519	AFG3-like protein 2 OS=Mus musculus OX=10090 GN=Afg3l2 PE=1 SV=1
394	3142	P13595	17.64	289.56	3874700	3855100	4261000	3003900	3292200	3503700	1.01	1	1.11	0.78	0.85	0.91	3874700	3855100	4261000	3003900	3292200	3503700	1.01	1	1.11	0.78	0.85	0.91	25	21	21	Carbamidomethylation; TMT10plex	119427	Neural cell adhesion molecule 1 OS=Mus musculus OX=10090 GN=Ncam1 PE=1 SV=3
274	1378	O08599	4.69	289.37	11005000	11038000	11553000	10432000	10119000	10458000	1	1	1.05	0.95	0.92	0.95	11005000	11038000	11553000	10432000	10119000	10458000	1	1	1.05	0.95	0.92	0.95	44	26	25	Carbamidomethylation; TMT10plex	67569	Syntaxin-binding protein 1 OS=Mus musculus OX=10090 GN=Stxbp1 PE=1 SV=2
676	4367	Q3ULD5	2.89	289.08	1538400	1551000	1520100	1536200	1416500	1516400	0.99	1	0.98	0.99	0.91	0.98	1538400	1551000	1520100	1536200	1416500	1516400	0.99	1	0.98	0.99	0.91	0.98	36	18	18	Carbamidomethylation; TMT10plex	61379	Methylcrotonoyl-CoA carboxylase beta chain mitochondrial OS=Mus musculus OX=10090 GN=Mccc2 PE=1 SV=1
339	222	Q9DCW4	5.03	288.81	14778000	16345000	15302000	14923000	15291000	13661000	0.9	1	0.94	0.91	0.94	0.84	14778000	16345000	15302000	14923000	15291000	13661000	0.9	1	0.94	0.91	0.94	0.84	61	16	16	Carbamidomethylation; TMT10plex	27623	Electron transfer flavoprotein subunit beta OS=Mus musculus OX=10090 GN=Etfb PE=1 SV=3
277	930	P10630	8.14	288.64	2433200	2824200	2488100	2816500	2921700	3033100	0.86	1	0.88	1	1.03	1.07	2433200	2824200	2488100	2816500	2921700	3033100	0.86	1	0.88	1	1.03	1.07	24	19	7	Carbamidomethylation; TMT10plex	46402	Eukaryotic initiation factor 4A-II OS=Mus musculus OX=10090 GN=Eif4a2 PE=1 SV=2
374	2621	Q6PDG5	9.74	288.41	4063100	4002200	4205300	3725300	4174900	3361400	1.02	1	1.05	0.93	1.04	0.84	4063100	4002200	4205300	3725300	4174900	3361400	1.02	1	1.05	0.93	1.04	0.84	19	21	21	Carbamidomethylation; TMT10plex	132604	SWI/SNF complex subunit SMARCC2 OS=Mus musculus OX=10090 GN=Smarcc2 PE=1 SV=2
539	1015	Q9DCL9	16.53	288.2	6677500	7580900	6549600	5454700	8308400	6063800	0.88	1	0.86	0.72	1.1	0.8	6677500	7580900	6549600	5454700	8308400	6063800	0.88	1	0.86	0.72	1.1	0.8	45	21	21	Carbamidomethylation; TMT10plex	47006	Multifunctional protein ADE2 OS=Mus musculus OX=10090 GN=Paics PE=1 SV=4
106	15811	P17742	18.29	287.86	35646000	43610000	34850000	42565000	48854000	44709000	0.82	1	0.8	0.98	1.12	1.03	35646000	43610000	34850000	42565000	48854000	44709000	0.82	1	0.8	0.98	1.12	1.03	62	13	13	Carbamidomethylation; TMT10plex; Oxidation (M)	17971	Peptidyl-prolyl cis-trans isomerase A OS=Mus musculus OX=10090 GN=Ppia PE=1 SV=2
442	8490	Q64737	4.34	287.8	4494700	4205200	4310700	4067300	3804500	3816800	1.07	1	1.03	0.97	0.9	0.91	4494700	4205200	4310700	4067300	3804500	3816800	1.07	1	1.03	0.97	0.9	0.91	27	22	22	Carbamidomethylation; TMT10plex	107503	Trifunctional purine biosynthetic protein adenosine-3 OS=Mus musculus OX=10090 GN=Gart PE=1 SV=3
595	6298	P47856	6.23	287.79	1534700	1490300	1415500	1478100	1382800	1666900	1.03	1	0.95	0.99	0.93	1.12	1534700	1490300	1415500	1478100	1382800	1666900	1.03	1	0.95	0.99	0.93	1.12	38	20	20	Carbamidomethylation; TMT10plex	78539	Glutamine--fructose-6-phosphate aminotransferase [isomerizing] 1 OS=Mus musculus OX=10090 GN=Gfpt1 PE=1 SV=3
281	63	Q9QXZ0	2.74	287.63	1174100	1109400	1088000	1053900	1106000	1071700	1.06	1	0.98	0.95	1	0.97	1174100	1109400	1088000	1053900	1106000	1071700	1.06	1	0.98	0.95	1	0.97	6	35	33	Carbamidomethylation; TMT10plex	831894	Microtubule-actin cross-linking factor 1 OS=Mus musculus OX=10090 GN=Macf1 PE=1 SV=2
450	6781	P39053	12.11	287.44	666670	777110	834790	772410	769030	644140	0.86	1	1.07	0.99	0.99	0.83	666670	777110	834790	772410	769030	644140	0.86	1	1.07	0.99	0.99	0.83	16	23	12	Carbamidomethylation; TMT10plex	97803	Dynamin-1 OS=Mus musculus OX=10090 GN=Dnm1 PE=1 SV=2
205	578	Q9DBC7	6.31	287.42	7320000	7235000	6483000	7647400	6583700	7509500	1.01	1	0.9	1.06	0.91	1.04	7320000	7235000	6483000	7647400	6583700	7509500	1.01	1	0.9	1.06	0.91	1.04	38	19	14	Carbamidomethylation; TMT10plex	43185	cAMP-dependent protein kinase type I-alpha regulatory subunit OS=Mus musculus OX=10090 GN=Prkar1a PE=1 SV=3
961	1113	P61222	9.48	287.41	2609800	2773800	2697900	2688400	2226000	2445600	0.94	1	0.97	0.97	0.8	0.88	2609800	2773800	2697900	2688400	2226000	2445600	0.94	1	0.97	0.97	0.8	0.88	26	14	14	Carbamidomethylation; TMT10plex	67314	ATP-binding cassette sub-family E member 1 OS=Mus musculus OX=10090 GN=Abce1 PE=1 SV=1
573	408	P12265	15.05	287.27	3584400	3573800	3929800	3973900	4817900	3228300	1	1	1.1	1.11	1.35	0.9	3584400	3573800	3929800	3973900	4817900	3228300	1	1	1.1	1.11	1.35	0.9	29	17	17	Carbamidomethylation; TMT10plex	74195	Beta-glucuronidase OS=Mus musculus OX=10090 GN=Gusb PE=1 SV=2
152	78	Q9CQV8	38.92	287.2	700260	1118700	612240	611400	992520	724530	0.63	1	0.55	0.55	0.89	0.65	700260	1118700	612240	611400	992520	724530	0.63	1	0.55	0.55	0.89	0.65	23	12	5	TMT10plex	28086	14-3-3 protein beta/alpha OS=Mus musculus OX=10090 GN=Ywhab PE=1 SV=3
718	4492	Q9Z2I8	1.83	287.08	3717400	3493600	3565300	3508800	3367800	3706400	1.06	1	1.02	1	0.96	1.06	3717400	3493600	3565300	3508800	3367800	3706400	1.06	1	1.02	1	0.96	1.06	46	18	18	Carbamidomethylation; TMT10plex	46840	Succinate--CoA ligase [GDP-forming] subunit beta mitochondrial OS=Mus musculus OX=10090 GN=Suclg2 PE=1 SV=3
235	2930	Q5SWU9	6.83	286.74	2594300	2661400	2685500	2503100	2254600	2435600	0.97	1	1.01	0.94	0.85	0.92	2594300	2661400	2685500	2503100	2254600	2435600	0.97	1	1.01	0.94	0.85	0.92	19	37	37	Carbamidomethylation; TMT10plex	265254	Acetyl-CoA carboxylase 1 OS=Mus musculus OX=10090 GN=Acaca PE=1 SV=1
192	703	O08749	7.68	286.73	14618000	16764000	13921000	13865000	13862000	14386000	0.87	1	0.83	0.83	0.83	0.86	14618000	16764000	13921000	13865000	13862000	14386000	0.87	1	0.83	0.83	0.83	0.86	38	19	19	Carbamidomethylation; TMT10plex; Oxidation (M)	54272	Dihydrolipoyl dehydrogenase mitochondrial OS=Mus musculus OX=10090 GN=Dld PE=1 SV=2
634	7688	Q3UJB9	8.3	286.69	2026600	2159800	1963800	2438300	1833700	1911800	0.94	1	0.91	1.13	0.85	0.89	2026600	2159800	1963800	2438300	1833700	1911800	0.94	1	0.91	1.13	0.85	0.89	19	20	20	Carbamidomethylation; TMT10plex	152483	Enhancer of mRNA-decapping protein 4 OS=Mus musculus OX=10090 GN=Edc4 PE=1 SV=2
438	644	P33173	10.7	286.62	1809400	1813100	1749200	1610700	1428000	1627400	1	1	0.96	0.89	0.79	0.9	1809400	1813100	1749200	1610700	1428000	1627400	1	1	0.96	0.89	0.79	0.9	16	26	21	Carbamidomethylation; TMT10plex	191724	Kinesin-like protein KIF1A OS=Mus musculus OX=10090 GN=Kif1a PE=1 SV=2
481	1577	Q6ZWX6	3.86	286.39	5249300	5355600	5297700	5592300	4959000	4727200	0.98	1	0.99	1.04	0.93	0.88	5249300	5355600	5297700	5592300	4959000	4727200	0.98	1	0.99	1.04	0.93	0.88	64	23	23	Carbamidomethylation; TMT10plex	36108	Eukaryotic translation initiation factor 2 subunit 1 OS=Mus musculus OX=10090 GN=Eif2s1 PE=1 SV=3
375	338	Q8CI94	1.72	286.11	2573800	2539700	2494100	2459100	2436600	2352100	1.01	1	0.98	0.97	0.96	0.93	2573800	2539700	2494100	2459100	2436600	2352100	1.01	1	0.98	0.97	0.96	0.93	30	27	21	Carbamidomethylation; TMT10plex	96730	Glycogen phosphorylase brain form OS=Mus musculus OX=10090 GN=Pygb PE=1 SV=3
901	9057	Q8BJY1	3.36	285.85	3403200	3284800	3356200	3072200	3301300	3289100	1.04	1	1.02	0.94	1.01	1	3403200	3284800	3356200	3072200	3301300	3289100	1.04	1	1.02	0.94	1.01	1	32	14	14	Carbamidomethylation; TMT10plex	55972	26S proteasome non-ATPase regulatory subunit 5 OS=Mus musculus OX=10090 GN=Psmd5 PE=1 SV=4
271	929	Q61191	3.71	285.75	6701700	6522100	6622700	6074900	6580100	5929300	1.03	1	1.02	0.93	1.01	0.91	6701700	6522100	6622700	6074900	6580100	5929300	1.03	1	1.02	0.93	1.01	0.91	13	26	26	Carbamidomethylation; TMT10plex	210435	Host cell factor 1 OS=Mus musculus OX=10090 GN=Hcfc1 PE=1 SV=2
199	2126	O35129	8.03	285.57	11800000	11080000	11631000	11232000	9560300	10351000	1.07	1	1.05	1.01	0.86	0.93	11800000	11080000	11631000	11232000	9560300	10351000	1.07	1	1.05	1.01	0.86	0.93	75	22	22	TMT10plex	33296	Prohibitin-2 OS=Mus musculus OX=10090 GN=Phb2 PE=1 SV=1
576	3938	Q8BLN5	7.53	285.46	4799200	5013900	4376200	4335500	5278100	4906700	0.96	1	0.87	0.86	1.05	0.98	4799200	5013900	4376200	4335500	5278100	4906700	0.96	1	0.87	0.86	1.05	0.98	32	19	19	Carbamidomethylation; TMT10plex	83141	Lanosterol synthase OS=Mus musculus OX=10090 GN=Lss PE=1 SV=2
590	1518	Q99K01	6.28	285.37	2521800	2663700	2371100	2489300	2777000	2795400	0.95	1	0.89	0.93	1.04	1.05	2521800	2663700	2371100	2489300	2777000	2795400	0.95	1	0.89	0.93	1.04	1.05	30	21	21	Carbamidomethylation; TMT10plex	87336	Pyridoxal-dependent decarboxylase domain-containing protein 1 OS=Mus musculus OX=10090 GN=Pdxdc1 PE=1 SV=2
392	261	Q7TMY8	8.38	284.99	1382200	1378500	1329300	1243800	1126300	1286100	1	1	0.96	0.9	0.82	0.93	1382200	1378500	1329300	1243800	1126300	1286100	1	1	0.96	0.9	0.82	0.93	9	30	30	Carbamidomethylation; TMT10plex	482640	E3 ubiquitin-protein ligase HUWE1 OS=Mus musculus OX=10090 GN=Huwe1 PE=1 SV=5
709	9557	O08759	4.23	284.81	706240	797370	765780	699510	785870	742900	0.89	1	0.96	0.88	0.99	0.93	706240	797370	765780	699510	785870	742900	0.89	1	0.96	0.88	0.99	0.93	22	16	16	Carbamidomethylation; TMT10plex	99819	Ubiquitin-protein ligase E3A OS=Mus musculus OX=10090 GN=Ube3a PE=1 SV=2
314	1287	Q9CQN1	6.08	284.8	2854100	2826400	2889900	2850500	2860600	2461000	1.01	1	1.02	1.01	1.01	0.87	2854100	2826400	2889900	2850500	2860600	2461000	1.01	1	1.02	1.01	1.01	0.87	32	22	21	Carbamidomethylation; TMT10plex	80209	Heat shock protein 75 kDa mitochondrial OS=Mus musculus OX=10090 GN=Trap1 PE=1 SV=1
169	252	Q61595	5.68	284.56	7509200	7236800	7676800	6940800	6588000	7263000	1.04	1	1.06	0.96	0.91	1	7509200	7236800	7676800	6940800	6588000	7263000	1.04	1	1.06	0.96	0.91	1	29	37	37	Carbamidomethylation; TMT10plex	152592	Kinectin OS=Mus musculus OX=10090 GN=Ktn1 PE=1 SV=1
400	2220	P18654	11.61	284.45	1498600	1590900	1583400	1598600	2037500	1681000	0.94	1	1	1	1.28	1.06	1498600	1590900	1583400	1598600	2037500	1681000	0.94	1	1	1	1.28	1.06	27	24	16	TMT10plex	83694	Ribosomal protein S6 kinase alpha-3 OS=Mus musculus OX=10090 GN=Rps6ka3 PE=1 SV=2
578	3432	Q64442	10.16	284.29	6929800	7226300	6872000	6822900	5738600	5759800	0.96	1	0.95	0.94	0.79	0.8	6929800	7226300	6872000	6822900	5738600	5759800	0.96	1	0.95	0.94	0.79	0.8	52	15	15	Carbamidomethylation; TMT10plex	38249	Sorbitol dehydrogenase OS=Mus musculus OX=10090 GN=Sord PE=1 SV=3
542	6614	P53994	15.13	284.12	525240	701380	501510	513870	676710	427920	0.75	1	0.72	0.73	0.96	0.61	525240	701380	501510	513870	676710	427920	0.75	1	0.72	0.73	0.96	0.61	28	13	5	TMT10plex	23548	Ras-related protein Rab-2A OS=Mus musculus OX=10090 GN=Rab2a PE=1 SV=1
318	937	P61979	1.9	284.05	5862700	5986800	6128400	6175100	6327600	5748800	0.98	1	1.02	1.03	1.06	0.96	5862700	5986800	6128400	6175100	6327600	5748800	0.98	1	1.02	1.03	1.06	0.96	46	19	19	Carbamidomethylation; TMT10plex; Oxidation (M)	50976	Heterogeneous nuclear ribonucleoprotein K OS=Mus musculus OX=10090 GN=Hnrnpk PE=1 SV=1
469	4029	Q99KK7	2.26	283.97	4993000	4780100	5084100	4935500	4721900	4789800	1.04	1	1.06	1.03	0.99	1	4993000	4780100	5084100	4935500	4721900	4789800	1.04	1	1.06	1.03	0.99	1	33	18	18	Carbamidomethylation; TMT10plex	82898	Dipeptidyl peptidase 3 OS=Mus musculus OX=10090 GN=Dpp3 PE=1 SV=2
223	10817	Q9JLI6	2.8	283.7	13974000	12991000	13505000	14192000	13581000	13547000	1.08	1	1.04	1.09	1.05	1.04	13974000	12991000	13505000	14192000	13581000	13547000	1.08	1	1.04	1.09	1.05	1.04	55	20	20	Carbamidomethylation; TMT10plex; Oxidation (M)	47174	Selenocysteine lyase OS=Mus musculus OX=10090 GN=Scly PE=1 SV=1
829	14160	P39447	5.9	283.57	1350400	1391700	1332400	1586100	1220900	1325200	0.97	1	0.96	1.14	0.88	0.95	1350400	1391700	1332400	1586100	1220900	1325200	0.97	1	0.96	1.14	0.88	0.95	13	18	18	Carbamidomethylation; TMT10plex	194740	Tight junction protein ZO-1 OS=Mus musculus OX=10090 GN=Tjp1 PE=1 SV=2
516	244	P63239	4.49	283.57	5285200	5518500	5059600	4887200	5441300	4495900	0.96	1	0.92	0.89	0.99	0.81	5285200	5518500	5059600	4887200	5441300	4495900	0.96	1	0.92	0.89	0.99	0.81	27	17	17	Carbamidomethylation; TMT10plex	84174	Neuroendocrine convertase 1 OS=Mus musculus OX=10090 GN=Pcsk1 PE=1 SV=1
225	105	Q6PDQ2	4.68	283.51	6383000	5977700	5996500	6071700	6089700	5301300	1.07	1	1	1.02	1.02	0.89	6383000	5977700	5996500	6071700	6089700	5301300	1.07	1	1	1.02	1.02	0.89	22	38	38	Carbamidomethylation; TMT10plex	217749	Chromodomain-helicase-DNA-binding protein 4 OS=Mus musculus OX=10090 GN=Chd4 PE=1 SV=1
449	44	Q9JHR7	12.69	283.35	4109400	3746700	4285500	4194700	3280100	4304200	1.1	1	1.14	1.12	0.88	1.15	4109400	3746700	4285500	4194700	3280100	4304200	1.1	1	1.14	1.12	0.88	1.15	25	23	23	Carbamidomethylation; TMT10plex	117772	Insulin-degrading enzyme OS=Mus musculus OX=10090 GN=Ide PE=1 SV=1
87	190	P43277	2.63	282.95	115100	114620	119050	155030	100560	112600	1	1	1.04	1.35	0.88	0.98	115100	114620	119050	155030	100560	112600	1	1	1.04	1.35	0.88	0.98	11	19	2	TMT10plex	22100	Histone H1.3 OS=Mus musculus OX=10090 GN=H1-3 PE=1 SV=2
485	2486	Q80UM7	4.57	282.94	3939300	4083100	3870200	4289700	4406700	3778400	0.96	1	0.95	1.05	1.08	0.93	3939300	4083100	3870200	4289700	4406700	3778400	0.96	1	0.95	1.05	1.08	0.93	33	20	20	Carbamidomethylation; TMT10plex	91831	Mannosyl-oligosaccharide glucosidase OS=Mus musculus OX=10090 GN=Mogs PE=1 SV=1
446	4285	P21619	6.18	282.92	856920	892470	791340	862610	758560	868100	0.96	1	0.89	0.97	0.85	0.97	856920	892470	791340	862610	758560	868100	0.96	1	0.89	0.97	0.85	0.97	35	23	16	TMT10plex	67318	Lamin-B2 OS=Mus musculus OX=10090 GN=Lmnb2 PE=1 SV=2
554	1047	Q9WV80	5.13	282.72	1824800	1967100	1706000	1671900	1838700	1813000	0.93	1	0.87	0.85	0.93	0.92	1824800	1967100	1706000	1671900	1838700	1813000	0.93	1	0.87	0.85	0.93	0.92	33	20	18	Carbamidomethylation; TMT10plex	58952	Sorting nexin-1 OS=Mus musculus OX=10090 GN=Snx1 PE=1 SV=1
610	329	Q3UEB3	5.58	282.62	1455300	1493500	1333700	1589600	1291400	1331500	0.97	1	0.89	1.06	0.86	0.89	1455300	1493500	1333700	1589600	1291400	1331500	0.97	1	0.89	1.06	0.86	0.89	35	17	17	Carbamidomethylation; TMT10plex	60249	Poly(U)-binding-splicing factor PUF60 OS=Mus musculus OX=10090 GN=Puf60 PE=1 SV=2
148	95	P68510	4.88	282.55	5295200	5657900	5660500	4931700	5267700	5265200	0.94	1	1	0.87	0.93	0.93	5295200	5657900	5660500	4931700	5267700	5265200	0.94	1	1	0.87	0.93	0.93	50	19	14	Carbamidomethylation; TMT10plex; Oxidation (M)	28212	14-3-3 protein eta OS=Mus musculus OX=10090 GN=Ywhah PE=1 SV=2
366	1267	Q5SUR0	5.91	282.49	4143400	4182500	4417100	4370800	3773500	3819100	0.99	1	1.06	1.05	0.9	0.91	4143400	4182500	4417100	4370800	3773500	3819100	0.99	1	1.06	1.05	0.9	0.91	25	24	24	Carbamidomethylation; TMT10plex	144629	Phosphoribosylformylglycinamidine synthase OS=Mus musculus OX=10090 GN=Pfas PE=1 SV=1
524	2890	Q8BHG1	8.13	282.39	2985200	2977500	2615500	2421400	2826100	2655000	1	1	0.88	0.81	0.95	0.89	2985200	2977500	2615500	2421400	2826100	2655000	1	1	0.88	0.81	0.95	0.89	20	20	20	Carbamidomethylation; TMT10plex	132891	Nardilysin OS=Mus musculus OX=10090 GN=Nrdc PE=1 SV=1
620	10364	Q8CIN4	7.4	282.35	1607900	1680400	1571300	1634900	1396400	1690400	0.96	1	0.94	0.97	0.83	1.01	1607900	1680400	1571300	1634900	1396400	1690400	0.96	1	0.94	0.97	0.83	1.01	23	16	11	Carbamidomethylation; TMT10plex	57930	Serine/threonine-protein kinase PAK 2 OS=Mus musculus OX=10090 GN=Pak2 PE=1 SV=1
436	9435	P39749	8.74	282.06	18579000	16824000	17616000	18133000	14308000	16400000	1.1	1	1.05	1.08	0.85	0.97	18579000	16824000	17616000	18133000	14308000	16400000	1.1	1	1.05	1.08	0.85	0.97	33	13	13	Carbamidomethylation; TMT10plex; Oxidation (M)	42315	Flap endonuclease 1 OS=Mus musculus OX=10090 GN=Fen1 PE=1 SV=1
413	241	P52431	4.83	281.8	2121200	2320300	2054700	2096000	2026200	1844700	0.91	1	0.89	0.9	0.87	0.8	2121200	2320300	2054700	2096000	2026200	1844700	0.91	1	0.89	0.9	0.87	0.8	26	27	27	Carbamidomethylation; TMT10plex	123790	DNA polymerase delta catalytic subunit OS=Mus musculus OX=10090 GN=Pold1 PE=1 SV=2
402	1076	P14576	6.53	281.65	4915900	5244700	4455500	4544000	4758400	5277000	0.94	1	0.85	0.87	0.91	1.01	4915900	5244700	4455500	4544000	4758400	5277000	0.94	1	0.85	0.87	0.91	1.01	54	25	25	Carbamidomethylation; TMT10plex	55721	Signal recognition particle 54 kDa protein OS=Mus musculus OX=10090 GN=Srp54 PE=1 SV=2
970	1423	Q8C1B7	15.26	281.52	963690	1033600	814920	838960	764710	853560	0.93	1	0.79	0.81	0.74	0.83	963690	1033600	814920	838960	764710	853560	0.93	1	0.79	0.81	0.74	0.83	11	10	4	Carbamidomethylation; TMT10plex	49695	Septin-11 OS=Mus musculus OX=10090 GN=Septin11 PE=1 SV=4
336	1714	Q8K0U4	3.2	281.49	5528200	5136900	5499200	5220600	4983900	4990800	1.08	1	1.07	1.02	0.97	0.97	5528200	5136900	5499200	5220600	4983900	4990800	1.08	1	1.07	1.02	0.97	0.97	29	26	23	Carbamidomethylation; TMT10plex	74871	Heat shock 70 kDa protein 12A OS=Mus musculus OX=10090 GN=Hspa12a PE=1 SV=1
367	781	Q9Z1Z0	2.59	281.46	4320400	4462800	4129400	4363800	4107600	4395100	0.97	1	0.93	0.98	0.92	0.98	4320400	4462800	4129400	4363800	4107600	4395100	0.97	1	0.93	0.98	0.92	0.98	31	28	28	Carbamidomethylation; TMT10plex	106983	General vesicular transport factor p115 OS=Mus musculus OX=10090 GN=Uso1 PE=1 SV=2
1158	6685	P60879	19.35	280.88	1397800	1291800	1726800	1342900	1832900	1736300	1.08	1	1.34	1.04	1.42	1.34	1397800	1291800	1726800	1342900	1832900	1736300	1.08	1	1.34	1.04	1.42	1.34	59	12	12	TMT10plex	23315	Synaptosomal-associated protein 25 OS=Mus musculus OX=10090 GN=Snap25 PE=1 SV=1
566	3403	Q7TT37	4.54	280.64	1797800	2089700	1858800	1893400	1951600	1824700	0.86	1	0.89	0.91	0.93	0.87	1797800	2089700	1858800	1893400	1951600	1824700	0.86	1	0.89	0.91	0.93	0.87	19	22	22	Carbamidomethylation; TMT10plex	149583	Elongator complex protein 1 OS=Mus musculus OX=10090 GN=Elp1 PE=1 SV=2
533	3909	P51174	1.91	280.5	7299700	7655400	7638300	7394300	7179100	7828700	0.95	1	1	0.97	0.94	1.02	7299700	7655400	7638300	7394300	7179100	7828700	0.95	1	1	0.97	0.94	1.02	30	12	12	Carbamidomethylation; TMT10plex	47908	Long-chain specific acyl-CoA dehydrogenase mitochondrial OS=Mus musculus OX=10090 GN=Acadl PE=1 SV=2
607	4849	Q9CR62	20.89	280.26	2794600	3301500	2287600	2590300	2987100	3084600	0.85	1	0.69	0.78	0.9	0.93	2794600	3301500	2287600	2590300	2987100	3084600	0.85	1	0.69	0.78	0.9	0.93	47	13	13	Carbamidomethylation; TMT10plex	34155	Mitochondrial 2-oxoglutarate/malate carrier protein OS=Mus musculus OX=10090 GN=Slc25a11 PE=1 SV=3
789	2235	Q60854	6.46	280.08	3518400	3725400	3544300	3468700	4192600	3558500	0.94	1	0.95	0.93	1.13	0.96	3518400	3725400	3544300	3468700	4192600	3558500	0.94	1	0.95	0.93	1.13	0.96	44	14	14	Carbamidomethylation; TMT10plex	42599	Serpin B6 OS=Mus musculus OX=10090 GN=Serpinb6 PE=1 SV=1
837	15727	P00493	3.4	279.87	6166700	6237100	5625900	5984500	5760300	5820500	0.99	1	0.9	0.96	0.92	0.93	6166700	6237100	5625900	5984500	5760300	5820500	0.99	1	0.9	0.96	0.92	0.93	56	11	11	Carbamidomethylation; TMT10plex; Oxidation (M)	24570	Hypoxanthine-guanine phosphoribosyltransferase OS=Mus musculus OX=10090 GN=Hprt1 PE=1 SV=3
1269	15777	P10605	10.07	279.52	2186200	2447500	2276800	2061700	1946300	2307500	0.89	1	0.93	0.84	0.8	0.94	2186200	2447500	2276800	2061700	1946300	2307500	0.89	1	0.93	0.84	0.8	0.94	34	11	11	Carbamidomethylation; TMT10plex	37280	Cathepsin B OS=Mus musculus OX=10090 GN=Ctsb PE=1 SV=2
322	1767	Q9ESZ8	4.17	279.43	3018200	3214000	2969600	3031400	2847400	2994600	0.94	1	0.92	0.94	0.89	0.93	3018200	3214000	2969600	3031400	2847400	2994600	0.94	1	0.92	0.94	0.89	0.93	31	30	30	Carbamidomethylation; TMT10plex	112265	General transcription factor II-I OS=Mus musculus OX=10090 GN=Gtf2i PE=1 SV=3
232	431	Q9D6R2	2.06	279.37	16418000	16579000	17264000	17578000	16429000	17125000	0.99	1	1.04	1.06	0.99	1.03	16418000	16579000	17264000	17578000	16429000	17125000	0.99	1	1.04	1.06	0.99	1.03	40	20	20	Carbamidomethylation; TMT10plex; Oxidation (M)	39639	Isocitrate dehydrogenase [NAD] subunit alpha mitochondrial OS=Mus musculus OX=10090 GN=Idh3a PE=1 SV=1
547	1810	Q91WU5	2.96	279.19	4957100	5138800	5004600	4908400	4685600	4763600	0.96	1	0.97	0.96	0.91	0.93	4957100	5138800	5004600	4908400	4685600	4763600	0.96	1	0.97	0.96	0.91	0.93	56	17	17	Carbamidomethylation; TMT10plex	41794	Arsenite methyltransferase OS=Mus musculus OX=10090 GN=As3mt PE=1 SV=2
230	12537	P00329	2.94	278.98	23380000	22805000	23063000	24214000	21708000	22433000	1.03	1	1.01	1.06	0.95	0.98	23380000	22805000	23063000	24214000	21708000	22433000	1.03	1	1.01	1.06	0.95	0.98	52	17	17	Carbamidomethylation; TMT10plex; Oxidation (M)	39771	Alcohol dehydrogenase 1 OS=Mus musculus OX=10090 GN=Adh1 PE=1 SV=2
658	316	O35737	101.53	278.81	305930	343300	263810	283870	771050	294230	0.89	1	0.77	0.83	2.25	0.86	305930	343300	263810	283870	771050	294230	0.89	1	0.77	0.83	2.25	0.86	13	10	4	Carbamidomethylation; TMT10plex; Oxidation (M); Acetylation (Protein N-term)	49199	Heterogeneous nuclear ribonucleoprotein H OS=Mus musculus OX=10090 GN=Hnrnph1 PE=1 SV=3
434	1587	Q9CZ13	20.81	278.8	9470500	9309100	9061300	9339400	13066000	8937500	1.02	1	0.97	1	1.4	0.96	9470500	9309100	9061300	9339400	13066000	8937500	1.02	1	0.97	1	1.4	0.96	39	14	14	Carbamidomethylation; TMT10plex; Oxidation (M)	52852	Cytochrome b-c1 complex subunit 1 mitochondrial OS=Mus musculus OX=10090 GN=Uqcrc1 PE=1 SV=2
448	3703	Q91ZA3	3.06	278.75	2768500	3075800	2873300	3001700	2921000	2750300	0.9	1	0.93	0.98	0.95	0.89	2768500	3075800	2873300	3001700	2921000	2750300	0.9	1	0.93	0.98	0.95	0.89	37	22	22	Carbamidomethylation; TMT10plex	79922	Propionyl-CoA carboxylase alpha chain mitochondrial OS=Mus musculus OX=10090 GN=Pcca PE=1 SV=2
398	928	P05201	31.1	278.59	15718000	10287000	16393000	15654000	13215000	14441000	1.53	1	1.59	1.52	1.28	1.4	15718000	10287000	16393000	15654000	13215000	14441000	1.53	1	1.59	1.52	1.28	1.4	45	19	19	Carbamidomethylation; TMT10plex; Oxidation (M)	46248	Aspartate aminotransferase cytoplasmic OS=Mus musculus OX=10090 GN=Got1 PE=1 SV=3
246	662	Q9D7G0	21.13	278.59	5444000	5397600	6041900	5335300	4175600	5596200	1.01	1	1.12	0.99	0.77	1.04	5444000	5397600	6041900	5335300	4175600	5596200	1.01	1	1.12	0.99	0.77	1.04	25	17	10	Carbamidomethylation; TMT10plex	34834	Ribose-phosphate pyrophosphokinase 1 OS=Mus musculus OX=10090 GN=Prps1 PE=1 SV=4
464	832	Q99JI4	25.55	278.57	2842400	2794000	2513200	2529500	3804300	2485000	1.02	1	0.9	0.91	1.36	0.89	2842400	2794000	2513200	2529500	3804300	2485000	1.02	1	0.9	0.91	1.36	0.89	50	21	21	Carbamidomethylation; TMT10plex	45536	26S proteasome non-ATPase regulatory subunit 6 OS=Mus musculus OX=10090 GN=Psmd6 PE=1 SV=1
765	4208	O88643	31.9	278.52	622860	874970	580980	615640	545230	638360	0.71	1	0.66	0.7	0.62	0.73	622860	874970	580980	615640	545230	638360	0.71	1	0.66	0.7	0.62	0.73	21	12	8	Carbamidomethylation; TMT10plex	60737	Serine/threonine-protein kinase PAK 1 OS=Mus musculus OX=10090 GN=Pak1 PE=1 SV=1
513	2096	Q9DC23	4.25	278.19	3381700	3389200	3162000	3271500	2997300	2855600	1	1	0.93	0.97	0.88	0.84	3381700	3389200	3162000	3271500	2997300	2855600	1	1	0.93	0.97	0.88	0.84	28	21	21	Carbamidomethylation; TMT10plex	90583	DnaJ homolog subfamily C member 10 OS=Mus musculus OX=10090 GN=Dnajc10 PE=1 SV=2
786	9437	Q60737	4.98	277.89	5356400	5044600	5002200	5216600	4392000	5423500	1.06	1	0.99	1.03	0.87	1.08	5356400	5044600	5002200	5216600	4392000	5423500	1.06	1	0.99	1.03	0.87	1.08	42	13	12	TMT10plex	45134	Casein kinase II subunit alpha OS=Mus musculus OX=10090 GN=Csnk2a1 PE=1 SV=2
729	12650	Q9WVA4	22.69	277.81	3480100	4338200	3127900	3730700	4600900	4502100	0.8	1	0.72	0.86	1.06	1.04	3480100	4338200	3127900	3730700	4600900	4502100	0.8	1	0.72	0.86	1.06	1.04	62	15	13	Carbamidomethylation; TMT10plex; Oxidation (M)	22395	Transgelin-2 OS=Mus musculus OX=10090 GN=Tagln2 PE=1 SV=4
673	10297	O88967	8.33	277.78	3657000	3429900	3297800	3493600	2805000	2996600	1.07	1	0.96	1.02	0.82	0.87	3657000	3429900	3297800	3493600	2805000	2996600	1.07	1	0.96	1.02	0.82	0.87	25	17	17	Carbamidomethylation; TMT10plex	80028	ATP-dependent zinc metalloprotease YME1L1 OS=Mus musculus OX=10090 GN=Yme1l1 PE=1 SV=1
110	69	P14152	1.28	277.77	31717000	31157000	31907000	31088000	30490000	31278000	1.02	1	1.02	1	0.98	1	31717000	31157000	31907000	31088000	30490000	31278000	1.02	1	1.02	1	0.98	1	50	18	18	Carbamidomethylation; TMT10plex; Oxidation (M)	36511	Malate dehydrogenase cytoplasmic OS=Mus musculus OX=10090 GN=Mdh1 PE=1 SV=3
423	2634	P62702	10.08	277.77	12399000	15595000	13138000	13436000	13517000	15739000	0.8	1	0.84	0.86	0.87	1.01	12399000	15595000	13138000	13436000	13517000	15739000	0.8	1	0.84	0.86	0.87	1.01	58	18	18	Carbamidomethylation; TMT10plex; Oxidation (M)	29598	40S ribosomal protein S4 X isoform OS=Mus musculus OX=10090 GN=Rps4x PE=1 SV=2
1182	1008	O35295	6.21	277.75	2280300	2486700	2650200	2630700	2565800	2251300	0.92	1	1.07	1.06	1.03	0.91	2280300	2486700	2650200	2630700	2565800	2251300	0.92	1	1.07	1.06	1.03	0.91	27	10	10	Carbamidomethylation; TMT10plex	33901	Transcriptional activator protein Pur-beta OS=Mus musculus OX=10090 GN=Purb PE=1 SV=3
846	4201	P42125	4.97	277.58	3575700	3223900	3395000	3243000	3702300	3514000	1.11	1	1.05	1.01	1.15	1.09	3575700	3223900	3395000	3243000	3702300	3514000	1.11	1	1.05	1.01	1.15	1.09	35	10	10	TMT10plex	32250	Enoyl-CoA delta isomerase 1 mitochondrial OS=Mus musculus OX=10090 GN=Eci1 PE=1 SV=2
500	3152	Q921G7	1.9	277.56	4537200	4796400	4599500	4608900	4643600	4333200	0.95	1	0.96	0.96	0.97	0.9	4537200	4796400	4599500	4608900	4643600	4333200	0.95	1	0.96	0.96	0.97	0.9	34	20	20	Carbamidomethylation; TMT10plex	68091	Electron transfer flavoprotein-ubiquinone oxidoreductase mitochondrial OS=Mus musculus OX=10090 GN=Etfdh PE=1 SV=1
313	11209	Q62167	13.12	277.19	4103200	4078900	4298200	4275600	3270300	3413600	1.01	1	1.05	1.05	0.8	0.84	4103200	4078900	4298200	4275600	3270300	3413600	1.01	1	1.05	1.05	0.8	0.84	34	26	23	Carbamidomethylation; TMT10plex	73102	ATP-dependent RNA helicase DDX3X OS=Mus musculus OX=10090 GN=Ddx3x PE=1 SV=3
945	15717	Q9D0M1	8.39	277.12	1051500	1211000	1051300	1011600	989350	1163100	0.87	1	0.87	0.84	0.82	0.96	1051500	1211000	1051300	1011600	989350	1163100	0.87	1	0.87	0.84	0.82	0.96	35	12	9	Carbamidomethylation; TMT10plex	39432	Phosphoribosyl pyrophosphate synthase-associated protein 1 OS=Mus musculus OX=10090 GN=Prpsap1 PE=1 SV=1
783	3038	O70194	4.46	277.07	3252600	3101300	3177300	2957600	3523300	2910400	1.05	1	1.02	0.95	1.14	0.94	3252600	3101300	3177300	2957600	3523300	2910400	1.05	1	1.02	0.95	1.14	0.94	41	16	16	Carbamidomethylation; TMT10plex	63989	Eukaryotic translation initiation factor 3 subunit D OS=Mus musculus OX=10090 GN=Eif3d PE=1 SV=2
222	142	P97351	4.24	277.07	19659000	20639000	21615000	19771000	19120000	19982000	0.95	1	1.05	0.96	0.93	0.97	19659000	20639000	21615000	19771000	19120000	19982000	0.95	1	1.05	0.96	0.93	0.97	66	25	25	Carbamidomethylation; TMT10plex	29885	40S ribosomal protein S3a OS=Mus musculus OX=10090 GN=Rps3a PE=1 SV=3
510	1096	Q9JHI5	7.13	277.06	14515000	15261000	13895000	14042000	12742000	13615000	0.95	1	0.91	0.92	0.83	0.89	14515000	15261000	13895000	14042000	12742000	13615000	0.95	1	0.91	0.92	0.83	0.89	41	17	17	Carbamidomethylation; TMT10plex; Oxidation (M)	46325	Isovaleryl-CoA dehydrogenase mitochondrial OS=Mus musculus OX=10090 GN=Ivd PE=1 SV=1
1080	6283	Q9DBF1	4.47	276.97	1042600	1126000	1043100	985600	1039500	1021400	0.93	1	0.93	0.88	0.92	0.91	1042600	1126000	1043100	985600	1039500	1021400	0.93	1	0.93	0.88	0.92	0.91	28	13	13	Carbamidomethylation; TMT10plex	58862	Alpha-aminoadipic semialdehyde dehydrogenase OS=Mus musculus OX=10090 GN=Aldh7a1 PE=1 SV=4
410	464	P57722	2.75	276.78	133100	134550	138710	150070	141170	141530	0.99	1	1.03	1.12	1.05	1.05	133100	134550	138710	150070	141170	141530	0.99	1	1.03	1.12	1.05	1.05	16	10	4	TMT10plex	39294	Poly(rC)-binding protein 3 OS=Mus musculus OX=10090 GN=Pcbp3 PE=1 SV=3
568	2750	Q9DCT2	7.6	276.26	7573800	8455800	7294200	7052900	7002200	7160300	0.9	1	0.86	0.83	0.83	0.85	7573800	8455800	7294200	7052900	7002200	7160300	0.9	1	0.86	0.83	0.83	0.85	43	14	14	TMT10plex	30149	NADH dehydrogenase [ubiquinone] iron-sulfur protein 3 mitochondrial OS=Mus musculus OX=10090 GN=Ndufs3 PE=1 SV=2
557	5799	O88447	11.38	276.21	1041300	1115200	1016600	886790	869560	871250	0.93	1	0.91	0.8	0.78	0.78	1041300	1115200	1016600	886790	869560	871250	0.93	1	0.91	0.8	0.78	0.78	28	22	15	Carbamidomethylation; TMT10plex	61450	Kinesin light chain 1 OS=Mus musculus OX=10090 GN=Klc1 PE=1 SV=3
586	616	Q9ESE1	7.11	276.01	1063100	1072300	1021100	964920	895830	1065500	0.99	1	0.95	0.9	0.84	0.99	1063100	1072300	1021100	964920	895830	1065500	0.99	1	0.95	0.9	0.84	0.99	7	22	17	Carbamidomethylation; TMT10plex	317062	Lipopolysaccharide-responsive and beige-like anchor protein OS=Mus musculus OX=10090 GN=Lrba PE=1 SV=1
447	3359	P62334	6.92	276	8625400	8068700	8099800	7829000	6789000	7822900	1.07	1	1	0.97	0.84	0.97	8625400	8068700	8099800	7829000	6789000	7822900	1.07	1	1	0.97	0.84	0.97	54	20	20	Carbamidomethylation; TMT10plex	44173	26S proteasome regulatory subunit 10B OS=Mus musculus OX=10090 GN=Psmc6 PE=1 SV=1
309	768	O35685	3.87	275.95	6104800	6513900	6004800	5723800	5844900	6113700	0.94	1	0.92	0.88	0.9	0.94	6104800	6513900	6004800	5723800	5844900	6113700	0.94	1	0.92	0.88	0.9	0.94	55	23	23	TMT10plex	38358	Nuclear migration protein nudC OS=Mus musculus OX=10090 GN=Nudc PE=1 SV=1
742	3987	Q8CHP8	8.49	275.8	5682200	6102200	5567600	5435800	4976700	5312200	0.93	1	0.91	0.89	0.82	0.87	5682200	6102200	5567600	5435800	4976700	5312200	0.93	1	0.91	0.89	0.82	0.87	35	12	12	Carbamidomethylation; TMT10plex	34541	Glycerol-3-phosphate phosphatase OS=Mus musculus OX=10090 GN=Pgp PE=1 SV=1
435	4418	Q99JI6	12.05	275.56	12412000	10114000	13048000	12005000	10076000	11205000	1.23	1	1.29	1.19	1	1.11	12412000	10114000	13048000	12005000	10076000	11205000	1.23	1	1.29	1.19	1	1.11	19	12	3	Carbamidomethylation; TMT10plex	20825	Ras-related protein Rap-1b OS=Mus musculus OX=10090 GN=Rap1b PE=1 SV=2
584	1194	Q61029	8.44	275.54	4354900	3635000	4463000	3978200	3738600	3711800	1.2	1	1.23	1.09	1.03	1.02	4354900	3635000	4463000	3978200	3738600	3711800	1.2	1	1.23	1.09	1.03	1.02	19	17	8	Carbamidomethylation; TMT10plex	50373	Lamina-associated polypeptide 2 isoforms beta/delta/epsilon/gamma OS=Mus musculus OX=10090 GN=Tmpo PE=1 SV=4
493	1750	P35235	5.35	275.49	2680200	2754800	2870900	2651100	2566500	2480200	0.97	1	1.04	0.96	0.93	0.9	2680200	2754800	2870900	2651100	2566500	2480200	0.97	1	1.04	0.96	0.93	0.9	37	22	22	Carbamidomethylation; TMT10plex	68035	Tyrosine-protein phosphatase non-receptor type 11 OS=Mus musculus OX=10090 GN=Ptpn11 PE=1 SV=3
263	595	P39054	4.45	275.35	1527600	1537800	1439400	1369500	1354100	1373500	0.99	1	0.94	0.89	0.88	0.89	1527600	1537800	1439400	1369500	1354100	1373500	0.99	1	0.94	0.89	0.88	0.89	21	30	16	Carbamidomethylation; TMT10plex	98145	Dynamin-2 OS=Mus musculus OX=10090 GN=Dnm2 PE=1 SV=2
237	348	Q8C8R3	6.49	275.34	1302300	1223000	1398200	1183900	1188300	1181400	1.06	1	1.14	0.97	0.97	0.97	1302300	1223000	1398200	1183900	1188300	1181400	1.06	1	1.14	0.97	0.97	0.97	11	35	31	Carbamidomethylation; TMT10plex	426265	Ankyrin-2 OS=Mus musculus OX=10090 GN=Ank2 PE=1 SV=2
430	1798	P17918	8.52	275.25	14468000	15217000	12404000	13608000	13161000	12772000	0.95	1	0.82	0.89	0.86	0.84	14468000	15217000	12404000	13608000	13161000	12772000	0.95	1	0.82	0.89	0.86	0.84	63	15	15	Carbamidomethylation; TMT10plex; Oxidation (M)	28785	Proliferating cell nuclear antigen OS=Mus musculus OX=10090 GN=Pcna PE=1 SV=2
739	15705	Q8CDN6	6.11	275.19	2289900	2347900	2121400	2039300	1998000	2067700	0.98	1	0.9	0.87	0.85	0.88	2289900	2347900	2121400	2039300	1998000	2067700	0.98	1	0.9	0.87	0.85	0.88	68	14	14	Carbamidomethylation; TMT10plex	32237	Thioredoxin-like protein 1 OS=Mus musculus OX=10090 GN=Txnl1 PE=1 SV=3
649	3343	P99029	9.16	274.78	7290900	7773200	7611500	7529600	6270400	6953600	0.94	1	0.98	0.97	0.81	0.89	7290900	7773200	7611500	7529600	6270400	6953600	0.94	1	0.98	0.97	0.81	0.89	52	11	11	Carbamidomethylation; TMT10plex	21897	Peroxiredoxin-5 mitochondrial OS=Mus musculus OX=10090 GN=Prdx5 PE=1 SV=2
146	2368	Q9DBJ1	4.78	274.73	13008000	12479000	12487000	14274000	13476000	11863000	1.04	1	1	1.14	1.08	0.95	13008000	12479000	12487000	14274000	13476000	11863000	1.04	1	1	1.14	1.08	0.95	70	16	16	Carbamidomethylation; TMT10plex; Oxidation (M)	28832	Phosphoglycerate mutase 1 OS=Mus musculus OX=10090 GN=Pgam1 PE=1 SV=3
868	5110	Q9Z2W0	2.31	274.17	4240600	3927200	4088000	4248900	3795800	3890600	1.08	1	1.04	1.08	0.97	0.99	4240600	3927200	4088000	4248900	3795800	3890600	1.08	1	1.04	1.08	0.97	0.99	36	14	14	Carbamidomethylation; TMT10plex	52207	Aspartyl aminopeptidase OS=Mus musculus OX=10090 GN=Dnpep PE=1 SV=2
677	7185	Q62418	23.27	274.09	2463600	2254000	2398900	2632100	3292100	3549700	1.09	1	1.06	1.17	1.46	1.57	2463600	2254000	2398900	2632100	3292100	3549700	1.09	1	1.06	1.17	1.46	1.57	44	16	16	Carbamidomethylation; TMT10plex	48700	Drebrin-like protein OS=Mus musculus OX=10090 GN=Dbnl PE=1 SV=2
704	507	Q91V41	8.46	274.02	3058100	3064100	2951700	2881000	2680800	2408600	1	1	0.96	0.94	0.87	0.79	3058100	3064100	2951700	2881000	2680800	2408600	1	1	0.96	0.94	0.87	0.79	52	13	11	Carbamidomethylation; TMT10plex	23897	Ras-related protein Rab-14 OS=Mus musculus OX=10090 GN=Rab14 PE=1 SV=3
570	1576	P47911	6.33	273.98	15780000	17713000	18308000	17358000	15515000	15544000	0.89	1	1.03	0.98	0.88	0.88	15780000	17713000	18308000	17358000	15515000	15544000	0.89	1	1.03	0.98	0.88	0.88	44	16	16	TMT10plex	33510	60S ribosomal protein L6 OS=Mus musculus OX=10090 GN=Rpl6 PE=1 SV=3
833	2064	Q8R016	5.1	273.89	4956400	5305300	5413700	5012400	4701000	5088700	0.93	1	1.02	0.94	0.89	0.96	4956400	5305300	5413700	5012400	4701000	5088700	0.93	1	1.02	0.94	0.89	0.96	34	15	15	Carbamidomethylation; TMT10plex; Oxidation (M)	52511	Bleomycin hydrolase OS=Mus musculus OX=10090 GN=Blmh PE=1 SV=1
288	1342	P47962	6.93	273.84	17880000	17771000	14984000	16175000	15897000	16389000	1.01	1	0.84	0.91	0.89	0.92	17880000	17771000	14984000	16175000	15897000	16389000	1.01	1	0.84	0.91	0.89	0.92	43	16	16	Carbamidomethylation; TMT10plex; Oxidation (M)	34401	60S ribosomal protein L5 OS=Mus musculus OX=10090 GN=Rpl5 PE=1 SV=3
315	6061	Q04447	2.74	273.63	9751200	9513200	10132000	9589500	10375000	9657000	1.03	1	1.07	1.01	1.09	1.02	9751200	9513200	10132000	9589500	10375000	9657000	1.03	1	1.07	1.01	1.09	1.02	35	13	13	Carbamidomethylation; TMT10plex	42713	Creatine kinase B-type OS=Mus musculus OX=10090 GN=Ckb PE=1 SV=1
794	3922	Q9R112	4.62	273.59	1591700	1774700	1550200	1805300	1746900	1645600	0.9	1	0.87	1.02	0.98	0.93	1591700	1774700	1550200	1805300	1746900	1645600	0.9	1	0.87	1.02	0.98	0.93	43	18	18	Carbamidomethylation; TMT10plex	50282	Sulfide:quinone oxidoreductase mitochondrial OS=Mus musculus OX=10090 GN=Sqor PE=1 SV=3
725	8259	Q8R146	8.34	273.47	2518700	2449600	2819400	2291200	2433100	2464900	1.03	1	1.15	0.94	0.99	1.01	2518700	2449600	2819400	2291200	2433100	2464900	1.03	1	1.15	0.94	0.99	1.01	26	16	16	Carbamidomethylation; TMT10plex	81581	Acylamino-acid-releasing enzyme OS=Mus musculus OX=10090 GN=Apeh PE=1 SV=3
535	2268	Q9Z2X1	6.06	273.25	4223000	4291900	3656200	4019100	4043600	3816800	0.98	1	0.85	0.94	0.94	0.89	4223000	4291900	3656200	4019100	4043600	3816800	0.98	1	0.85	0.94	0.94	0.89	29	11	9	Carbamidomethylation; TMT10plex; Oxidation (M); Acetylation (Protein N-term)	45730	Heterogeneous nuclear ribonucleoprotein F OS=Mus musculus OX=10090 GN=Hnrnpf PE=1 SV=3
647	15372	O54734	14.26	273.22	2930600	2851800	2776800	2645100	3705400	2500400	1.03	1	0.97	0.93	1.3	0.88	2930600	2851800	2776800	2645100	3705400	2500400	1.03	1	0.97	0.93	1.3	0.88	28	12	12	Carbamidomethylation; TMT10plex	49028	Dolichyl-diphosphooligosaccharide--protein glycosyltransferase 48 kDa subunit OS=Mus musculus OX=10090 GN=Ddost PE=1 SV=2
562	88	P56399	3.76	273.2	8661500	7974300	8498200	7746200	8522600	9309000	1.09	1	1.07	0.97	1.07	1.17	8661500	7974300	8498200	7746200	8522600	9309000	1.09	1	1.07	0.97	1.07	1.17	29	20	20	Carbamidomethylation; TMT10plex	95833	Ubiquitin carboxyl-terminal hydrolase 5 OS=Mus musculus OX=10090 GN=Usp5 PE=1 SV=1
721	6806	O88986	16.01	272.97	3626600	3515700	3448500	3292700	2576800	2866900	1.03	1	0.98	0.94	0.73	0.82	3626600	3515700	3448500	3292700	2576800	2866900	1.03	1	0.98	0.94	0.73	0.82	40	12	12	Carbamidomethylation; TMT10plex; Oxidation (M)	44931	2-amino-3-ketobutyrate coenzyme A ligase mitochondrial OS=Mus musculus OX=10090 GN=Gcat PE=1 SV=2
105	138	P43274	1.89	272.87	22516000	22010000	23185000	23601000	22842000	22401000	1.02	1	1.05	1.07	1.04	1.02	22516000	22010000	23185000	23601000	22842000	22401000	1.02	1	1.05	1.07	1.04	1.02	17	17	4	TMT10plex	21977	Histone H1.4 OS=Mus musculus OX=10090 GN=H1-4 PE=1 SV=2
345	421	P26339	17.04	272.75	7526700	8014700	7880900	9433000	10888000	9699300	0.94	1	0.98	1.18	1.36	1.21	7526700	8014700	7880900	9433000	10888000	9699300	0.94	1	0.98	1.18	1.36	1.21	29	13	13	TMT10plex	51789	Chromogranin-A OS=Mus musculus OX=10090 GN=Chga PE=1 SV=1
346	1936	O88569	23.38	272.74	6447200	8952300	6513700	7114000	9649000	6756500	0.72	1	0.73	0.79	1.08	0.75	6447200	8952300	6513700	7114000	9649000	6756500	0.72	1	0.73	0.79	1.08	0.75	45	17	14	Carbamidomethylation; TMT10plex; Oxidation (M)	37403	Heterogeneous nuclear ribonucleoproteins A2/B1 OS=Mus musculus OX=10090 GN=Hnrnpa2b1 PE=1 SV=2
628	1525	Q3UZV7	3.63	272.72	1720200	1751100	1748500	1598300	1570900	1617300	0.98	1	1	0.91	0.9	0.92	1720200	1751100	1748500	1598300	1570900	1617300	0.98	1	1	0.91	0.9	0.92	22	18	18	Carbamidomethylation; TMT10plex	113660	UPF0577 protein KIAA1324-like homolog OS=Mus musculus OX=10090 PE=1 SV=1
659	3802	Q9QUJ7	3.89	272.64	1394200	1550700	1491800	1547200	1382600	1517700	0.9	1	0.96	1	0.89	0.98	1394200	1550700	1491800	1547200	1382600	1517700	0.9	1	0.96	1	0.89	0.98	31	19	17	Carbamidomethylation; TMT10plex	79077	Long-chain-fatty-acid--CoA ligase 4 OS=Mus musculus OX=10090 GN=Acsl4 PE=1 SV=2
490	1372	Q8BG32	6.2	272.59	3195700	3558800	3099300	2996300	3227000	3201400	0.9	1	0.87	0.84	0.91	0.9	3195700	3558800	3099300	2996300	3227000	3201400	0.9	1	0.87	0.84	0.91	0.9	45	19	19	Carbamidomethylation; TMT10plex	47437	26S proteasome non-ATPase regulatory subunit 11 OS=Mus musculus OX=10090 GN=Psmd11 PE=1 SV=3
330	2298	P62908	3.78	272.59	8460300	8636000	8361600	8335300	7718700	7601500	0.98	1	0.97	0.97	0.89	0.88	8460300	8636000	8361600	8335300	7718700	7601500	0.98	1	0.97	0.97	0.89	0.88	69	16	16	Carbamidomethylation; TMT10plex; Oxidation (M)	26674	40S ribosomal protein S3 OS=Mus musculus OX=10090 GN=Rps3 PE=1 SV=1
569	2744	Q505F5	5.42	272.58	2954600	2941600	2867000	2875800	2537800	2938300	1	1	0.97	0.98	0.86	1	2954600	2941600	2867000	2875800	2537800	2938300	1	1	0.97	0.98	0.86	1	37	18	18	Carbamidomethylation; TMT10plex	63590	Leucine-rich repeat-containing protein 47 OS=Mus musculus OX=10090 GN=Lrrc47 PE=1 SV=1
370	1475	Q99LF4	7.27	272.45	5629900	5808200	6227900	6506200	5345600	5187600	0.97	1	1.07	1.12	0.92	0.89	5629900	5808200	6227900	6506200	5345600	5187600	0.97	1	1.07	1.12	0.92	0.89	52	25	25	Carbamidomethylation; TMT10plex	55249	RNA-splicing ligase RtcB homolog OS=Mus musculus OX=10090 GN=Rtcb PE=1 SV=1
885	285	Q8CHG3	1.03	272.45	685820	685740	687070	659920	668730	674310	1	1	1	0.96	0.98	0.98	685820	685740	687070	659920	668730	674310	1	1	1	0.96	0.98	0.98	11	16	16	TMT10plex	194443	GRIP and coiled-coil domain-containing protein 2 OS=Mus musculus OX=10090 GN=Gcc2 PE=1 SV=2
328	456	Q91YR7	10.08	272.44	3220000	3109800	3233800	3375800	3911500	2951800	1.04	1	1.04	1.09	1.26	0.95	3220000	3109800	3233800	3375800	3911500	2951800	1.04	1	1.04	1.09	1.26	0.95	30	27	27	Carbamidomethylation; TMT10plex	106722	Pre-mRNA-processing factor 6 OS=Mus musculus OX=10090 GN=Prpf6 PE=1 SV=1
132	152	P15864	11.02	272.38	24810000	23969000	28613000	27324000	25211000	22427000	1.04	1	1.19	1.14	1.05	0.94	24810000	23969000	28613000	27324000	25211000	22427000	1.04	1	1.19	1.14	1.05	0.94	15	18	6	TMT10plex	21267	Histone H1.2 OS=Mus musculus OX=10090 GN=H1-2 PE=1 SV=2
389	305	Q9DBG6	3.98	272.25	7919500	7387300	7241200	7349400	6767900	6828900	1.07	1	0.98	0.99	0.92	0.92	7919500	7387300	7241200	7349400	6767900	6828900	1.07	1	0.98	0.99	0.92	0.92	30	16	16	Carbamidomethylation; TMT10plex	69063	Dolichyl-diphosphooligosaccharide--protein glycosyltransferase subunit 2 OS=Mus musculus OX=10090 GN=Rpn2 PE=1 SV=1
593	4839	Q9ET01	10.59	272.23	1471300	1509400	1406700	1404200	1783200	1237700	0.97	1	0.93	0.93	1.18	0.82	1471300	1509400	1406700	1404200	1783200	1237700	0.97	1	0.93	0.93	1.18	0.82	22	22	19	Carbamidomethylation; TMT10plex	97463	Glycogen phosphorylase liver form OS=Mus musculus OX=10090 GN=Pygl PE=1 SV=4
1140	15691	Q5I012	5.11	272.2	1650300	1563000	1674100	1826000	1664500	1807400	1.06	1	1.07	1.17	1.06	1.16	1650300	1563000	1674100	1826000	1664500	1807400	1.06	1	1.07	1.17	1.06	1.16	18	14	14	TMT10plex	117194	Putative sodium-coupled neutral amino acid transporter 10 OS=Mus musculus OX=10090 GN=Slc38a10 PE=1 SV=2
780	11543	P51660	10.77	272.11	1100000	1128400	1165800	1192200	1434100	1037000	0.97	1	1.03	1.06	1.27	0.92	1100000	1128400	1165800	1192200	1434100	1037000	0.97	1	1.03	1.06	1.27	0.92	25	15	15	Carbamidomethylation; TMT10plex	79482	Peroxisomal multifunctional enzyme type 2 OS=Mus musculus OX=10090 GN=Hsd17b4 PE=1 SV=3
559	1012	Q8K4Z5	6.16	272	3922100	4030000	3989800	3625300	3426200	3514700	0.97	1	0.99	0.9	0.85	0.87	3922100	4030000	3989800	3625300	3426200	3514700	0.97	1	0.99	0.9	0.85	0.87	25	20	20	Carbamidomethylation; TMT10plex	88545	Splicing factor 3A subunit 1 OS=Mus musculus OX=10090 GN=Sf3a1 PE=1 SV=1
494	2031	Q68FL4	9.03	271.9	510780	450310	479960	464390	387980	412560	1.13	1	1.07	1.03	0.86	0.92	510780	450310	479960	464390	387980	412560	1.13	1	1.07	1.03	0.86	0.92	10	20	6	Carbamidomethylation; TMT10plex	66899	Putative adenosylhomocysteinase 3 OS=Mus musculus OX=10090 GN=Ahcyl2 PE=1 SV=1
758	1758	Q60967	3.29	271.73	1899900	1809500	1815900	2004200	1642100	1841900	1.05	1	1	1.11	0.91	1.02	1899900	1809500	1815900	2004200	1642100	1841900	1.05	1	1	1.11	0.91	1.02	31	16	15	Carbamidomethylation; TMT10plex	70794	Bifunctional 3'-phosphoadenosine 5'-phosphosulfate synthase 1 OS=Mus musculus OX=10090 GN=Papss1 PE=1 SV=1
800	11135	Q60673	6.67	271.71	2285200	2088700	2213000	2015700	1863500	1924300	1.09	1	1.06	0.97	0.89	0.92	2285200	2088700	2213000	2015700	1863500	1924300	1.09	1	1.06	0.97	0.89	0.92	12	11	11	Carbamidomethylation; TMT10plex	106083	Receptor-type tyrosine-protein phosphatase-like N OS=Mus musculus OX=10090 GN=Ptprn PE=1 SV=2
763	9601	P42225	7.01	271.63	1332500	1270700	1385700	1450500	1159600	1259300	1.05	1	1.09	1.14	0.91	0.99	1332500	1270700	1385700	1450500	1159600	1259300	1.05	1	1.09	1.14	0.91	0.99	23	15	15	Carbamidomethylation; TMT10plex	87197	Signal transducer and activator of transcription 1 OS=Mus musculus OX=10090 GN=Stat1 PE=1 SV=1
249	2867	Q9DB05	5.57	271.5	5358500	6211800	5555400	5300800	5343300	5555100	0.86	1	0.89	0.85	0.86	0.89	5358500	6211800	5555400	5300800	5343300	5555100	0.86	1	0.89	0.85	0.86	0.89	68	21	20	Carbamidomethylation; TMT10plex	33190	Alpha-soluble NSF attachment protein OS=Mus musculus OX=10090 GN=Napa PE=1 SV=1
429	15707	P10649	9.08	271.49	5042100	4539000	4983700	4650300	4025500	4179000	1.11	1	1.1	1.02	0.89	0.92	5042100	4539000	4983700	4650300	4025500	4179000	1.11	1	1.1	1.02	0.89	0.92	31	19	10	TMT10plex; Oxidation (M)	25970	Glutathione S-transferase Mu 1 OS=Mus musculus OX=10090 GN=Gstm1 PE=1 SV=2
643	13362	Q3TZZ7	4.59	271.22	2116700	1946600	2045400	1833900	2045100	1986400	1.09	1	1.05	0.94	1.05	1.02	2116700	1946600	2045400	1833900	2045100	1986400	1.09	1	1.05	0.94	1.05	1.02	23	17	17	Carbamidomethylation; TMT10plex	94139	Extended synaptotagmin-2 OS=Mus musculus OX=10090 GN=Esyt2 PE=1 SV=1
408	15703	Q9R1P4	12.11	271.19	4801000	4062400	5142400	4985300	5264800	4738500	1.18	1	1.27	1.23	1.3	1.17	4801000	4062400	5142400	4985300	5264800	4738500	1.18	1	1.27	1.23	1.3	1.17	62	15	15	Carbamidomethylation; TMT10plex; Oxidation (M)	29547	Proteasome subunit alpha type-1 OS=Mus musculus OX=10090 GN=Psma1 PE=1 SV=1
726	10022	Q61081	6.22	270.97	2458900	2540200	2607800	2754600	2214700	2772200	0.97	1	1.03	1.08	0.87	1.09	2458900	2540200	2607800	2754600	2214700	2772200	0.97	1	1.03	1.08	0.87	1.09	44	16	16	Carbamidomethylation; TMT10plex	44593	Hsp90 co-chaperone Cdc37 OS=Mus musculus OX=10090 GN=Cdc37 PE=1 SV=1
245	1142	P28271	4.24	270.85	4236900	4364900	4446000	3889500	4175700	4005300	0.97	1	1.02	0.89	0.96	0.92	4236900	4364900	4446000	3889500	4175700	4005300	0.97	1	1.02	0.89	0.96	0.92	33	28	27	Carbamidomethylation; TMT10plex	98126	Cytoplasmic aconitate hydratase OS=Mus musculus OX=10090 GN=Aco1 PE=1 SV=3
420	1093	Q9D0R2	4.12	270.83	4526000	4582800	4773600	4490500	4234400	4608800	0.99	1	1.04	0.98	0.92	1.01	4526000	4582800	4773600	4490500	4234400	4608800	0.99	1	1.04	0.98	0.92	1.01	34	23	21	Carbamidomethylation; TMT10plex	83356	Threonine--tRNA ligase 1 cytoplasmic OS=Mus musculus OX=10090 GN=Tars1 PE=1 SV=2
650	130	P51863	13.89	270.81	8496900	8733600	9714700	7531400	7943600	7316100	0.97	1	1.11	0.86	0.91	0.84	8496900	8733600	9714700	7531400	7943600	7316100	0.97	1	1.11	0.86	0.91	0.84	37	14	14	Carbamidomethylation; TMT10plex	40301	V-type proton ATPase subunit d 1 OS=Mus musculus OX=10090 GN=Atp6v0d1 PE=1 SV=2
667	2457	Q8VDM6	5.53	270.75	1723400	1565500	1700700	1504700	1463900	1502500	1.1	1	1.09	0.96	0.94	0.96	1723400	1565500	1700700	1504700	1463900	1502500	1.1	1	1.09	0.96	0.94	0.96	25	17	17	Carbamidomethylation; TMT10plex	96002	Heterogeneous nuclear ribonucleoprotein U-like protein 1 OS=Mus musculus OX=10090 GN=Hnrnpul1 PE=1 SV=1
551	442	B1ARD6	13.68	270.7	1543600	1468900	1149000	1108600	1115200	1003700	1.05	1	0.78	0.75	0.76	0.68	1543600	1468900	1149000	1108600	1115200	1003700	1.05	1	0.78	0.75	0.76	0.68	27	22	22	Carbamidomethylation; TMT10plex	103992	Schlafen family member 9 OS=Mus musculus OX=10090 GN=Slfn9 PE=2 SV=1
439	5254	Q8BGD9	14.46	270.69	4650100	3955900	4568300	5045000	5292600	5437800	1.18	1	1.15	1.28	1.34	1.37	4650100	3955900	4568300	5045000	5292600	5437800	1.18	1	1.15	1.28	1.34	1.37	23	14	14	Carbamidomethylation; TMT10plex	68840	Eukaryotic translation initiation factor 4B OS=Mus musculus OX=10090 GN=Eif4b PE=1 SV=1
964	3997	Q61024	2.85	270.51	2689500	2607800	2635800	2456000	2663500	2590600	1.03	1	1.01	0.94	1.02	0.99	2689500	2607800	2635800	2456000	2663500	2590600	1.03	1	1.01	0.94	1.02	0.99	30	15	15	Carbamidomethylation; TMT10plex	64283	Asparagine synthetase [glutamine-hydrolyzing] OS=Mus musculus OX=10090 GN=Asns PE=1 SV=3
207	875	P18872	12.13	270.09	5548500	5826900	4525100	5595100	5866100	5771500	0.95	1	0.78	0.96	1.01	0.99	5548500	5826900	4525100	5595100	5866100	5771500	0.95	1	0.78	0.96	1.01	0.99	37	13	11	Carbamidomethylation; TMT10plex; Oxidation (M)	40085	Guanine nucleotide-binding protein G(o) subunit alpha OS=Mus musculus OX=10090 GN=Gnao1 PE=1 SV=3
520	1361	Q6ZQ08	7.63	270.03	1331800	1459500	1225400	1258800	1207900	1194900	0.91	1	0.84	0.86	0.83	0.82	1331800	1459500	1225400	1258800	1207900	1194900	0.91	1	0.84	0.86	0.83	0.82	14	24	24	Carbamidomethylation; TMT10plex	266805	CCR4-NOT transcription complex subunit 1 OS=Mus musculus OX=10090 GN=Cnot1 PE=1 SV=2
437	1546	Q9Z0S1	5.54	269.99	9482600	10729000	9547400	9656900	9232800	9236600	0.88	1	0.89	0.9	0.86	0.86	9482600	10729000	9547400	9656900	9232800	9236600	0.88	1	0.89	0.9	0.86	0.86	42	11	11	Carbamidomethylation; TMT10plex	33196	3'(2') 5'-bisphosphate nucleotidase 1 OS=Mus musculus OX=10090 GN=Bpnt1 PE=1 SV=2
750	15709	Q9D819	12.38	269.89	1449300	1881700	1461800	1429300	1552500	1871000	0.77	1	0.78	0.76	0.83	0.99	1449300	1881700	1461800	1429300	1552500	1871000	0.77	1	0.78	0.76	0.83	0.99	56	15	15	Carbamidomethylation; TMT10plex	32667	Inorganic pyrophosphatase OS=Mus musculus OX=10090 GN=Ppa1 PE=1 SV=1
415	4378	P97467	4.1	269.83	6268800	5680200	6422800	6375800	6329900	6047300	1.1	1	1.13	1.12	1.11	1.06	6268800	5680200	6422800	6375800	6329900	6047300	1.1	1	1.13	1.12	1.11	1.06	22	20	20	Carbamidomethylation; TMT10plex	108963	Peptidyl-glycine alpha-amidating monooxygenase OS=Mus musculus OX=10090 GN=Pam PE=1 SV=2
1073	2928	Q99LB2	14.69	269.83	3176300	3579700	3355900	2923600	2668000	2949900	0.89	1	0.94	0.82	0.75	0.82	3176300	3579700	3355900	2923600	2668000	2949900	0.89	1	0.94	0.82	0.75	0.82	47	12	12	Carbamidomethylation; TMT10plex	29885	Dehydrogenase/reductase SDR family member 4 OS=Mus musculus OX=10090 GN=Dhrs4 PE=1 SV=3
864	8048	O70503	18.11	269.82	1728700	1985500	1431300	2002400	1762500	1647700	0.87	1	0.72	1.01	0.89	0.83	1728700	1985500	1431300	2002400	1762500	1647700	0.87	1	0.72	1.01	0.89	0.83	44	13	13	Carbamidomethylation; TMT10plex	34742	Very-long-chain 3-oxoacyl-CoA reductase OS=Mus musculus OX=10090 GN=Hsd17b12 PE=1 SV=1
376	1090	P26040	3.95	269.54	3217600	3290300	3272400	3145900	2929300	3142500	0.98	1	0.99	0.96	0.89	0.96	3217600	3290300	3272400	3145900	2929300	3142500	0.98	1	0.99	0.96	0.89	0.96	27	26	18	Carbamidomethylation; TMT10plex	69407	Ezrin OS=Mus musculus OX=10090 GN=Ezr PE=1 SV=3
521	1821	Q8C854	3.07	269.39	3837500	3980300	4001400	3669200	4288000	3901300	0.96	1	1.01	0.92	1.08	0.98	3837500	3980300	4001400	3669200	4288000	3901300	0.96	1	1.01	0.92	1.08	0.98	36	22	22	Carbamidomethylation; TMT10plex	63295	Myelin expression factor 2 OS=Mus musculus OX=10090 GN=Myef2 PE=1 SV=1
1007	8690	O88958	7.98	269.29	2971900	2929200	3092900	3189000	2544500	2837800	1.01	1	1.06	1.09	0.87	0.97	2971900	2929200	3092900	3189000	2544500	2837800	1.01	1	1.06	1.09	0.87	0.97	40	11	9	Carbamidomethylation; TMT10plex	32549	Glucosamine-6-phosphate isomerase 1 OS=Mus musculus OX=10090 GN=Gnpda1 PE=1 SV=3
651	1434	Q99020	5.94	269.26	8002500	8438100	8286500	9372900	9351900	9262100	0.95	1	0.98	1.11	1.11	1.1	8002500	8438100	8286500	9372900	9351900	9262100	0.95	1	0.98	1.11	1.11	1.1	38	15	14	TMT10plex	30831	Heterogeneous nuclear ribonucleoprotein A/B OS=Mus musculus OX=10090 GN=Hnrnpab PE=1 SV=1
604	7702	A2A8L5	21.58	269.19	527450	490610	619770	517460	487110	426300	1.08	1	1.26	1.05	0.99	0.87	527450	490610	619770	517460	487110	426300	1.08	1	1.26	1.05	0.99	0.87	15	20	18	Carbamidomethylation; TMT10plex	211488	Receptor-type tyrosine-protein phosphatase F OS=Mus musculus OX=10090 GN=Ptprf PE=1 SV=1
1040	15718	Q80XN0	4.95	269.17	2695600	2663300	3057600	2777400	2861900	2870800	1.01	1	1.15	1.04	1.07	1.08	2695600	2663300	3057600	2777400	2861900	2870800	1.01	1	1.15	1.04	1.07	1.08	41	13	13	Carbamidomethylation; TMT10plex	38299	D-beta-hydroxybutyrate dehydrogenase mitochondrial OS=Mus musculus OX=10090 GN=Bdh1 PE=1 SV=2
675	11891	Q07104	4.44	269.04	3707800	3877600	3842800	3917000	3831800	3384100	0.96	1	0.99	1.01	0.99	0.87	3707800	3877600	3842800	3917000	3831800	3384100	0.96	1	0.99	1.01	0.99	0.87	39	13	13	Carbamidomethylation; TMT10plex	41586	Growth/differentiation factor 3 OS=Mus musculus OX=10090 GN=Gdf3 PE=1 SV=2
744	12463	Q9D1A2	2.6	269.01	2216600	2296400	2264100	2218800	2255200	2083700	0.97	1	0.99	0.97	0.98	0.91	2216600	2296400	2264100	2218800	2255200	2083700	0.97	1	0.99	0.97	0.98	0.91	38	15	15	Carbamidomethylation; TMT10plex	52767	Cytosolic non-specific dipeptidase OS=Mus musculus OX=10090 GN=Cndp2 PE=1 SV=1
881	15839	P14206	4.07	268.95	10023000	9987300	9079200	10225000	9142800	9788100	1	1	0.91	1.02	0.92	0.98	10023000	9987300	9079200	10225000	9142800	9788100	1	1	0.91	1.02	0.92	0.98	39	11	11	Carbamidomethylation; TMT10plex	32838	40S ribosomal protein SA OS=Mus musculus OX=10090 GN=Rpsa PE=1 SV=4
555	1414	O55131	8.56	268.58	4779900	4474300	4842000	4313900	3944500	4681600	1.07	1	1.08	0.96	0.88	1.05	4779900	4474300	4842000	4313900	3944500	4681600	1.07	1	1.08	0.96	0.88	1.05	35	17	16	Carbamidomethylation; TMT10plex	50550	Septin-7 OS=Mus musculus OX=10090 GN=Septin7 PE=1 SV=1
565	13100	P17710	7.76	268.54	2868500	2936900	2740700	2436500	2425100	2812000	0.98	1	0.93	0.83	0.83	0.96	2868500	2936900	2740700	2436500	2425100	2812000	0.98	1	0.93	0.83	0.83	0.96	28	23	23	Carbamidomethylation; TMT10plex	108303	Hexokinase-1 OS=Mus musculus OX=10090 GN=Hk1 PE=1 SV=3
483	701	Q8BP47	8.39	268.49	3719400	3299300	3249000	3363700	3025300	3977200	1.13	1	0.98	1.02	0.92	1.21	3719400	3299300	3249000	3363700	3025300	3977200	1.13	1	0.98	1.02	0.92	1.21	39	21	21	Carbamidomethylation; TMT10plex; Oxidation (M)	64279	Asparagine--tRNA ligase cytoplasmic OS=Mus musculus OX=10090 GN=NARS1 PE=1 SV=2
482	528	Q8BK67	4.06	268.46	5839400	5552800	5716500	5599100	5486100	5076600	1.05	1	1.03	1.01	0.99	0.91	5839400	5552800	5716500	5599100	5486100	5076600	1.05	1	1.03	1.01	0.99	0.91	39	20	20	Carbamidomethylation; TMT10plex	55983	Protein RCC2 OS=Mus musculus OX=10090 GN=Rcc2 PE=1 SV=1
661	977	P55937	5.8	268.44	612130	609730	654680	630290	573590	560510	1	1	1.07	1.03	0.94	0.92	612130	609730	654680	630290	573590	560510	1	1	1.07	1.03	0.94	0.92	15	19	19	TMT10plex	167219	Golgin subfamily A member 3 OS=Mus musculus OX=10090 GN=Golga3 PE=1 SV=3
273	5672	P26043	5.65	268.21	5486100	5502800	6081700	6220400	5222400	5901200	1	1	1.11	1.13	0.95	1.07	5486100	5502800	6081700	6220400	5222400	5901200	1	1	1.11	1.13	0.95	1.07	32	32	22	TMT10plex	68543	Radixin OS=Mus musculus OX=10090 GN=Rdx PE=1 SV=3
617	2213	Q9Z2Q6	10.26	268.15	2922300	3033500	2957800	2747600	2405200	2617800	0.96	1	0.98	0.91	0.79	0.86	2922300	3033500	2957800	2747600	2405200	2617800	0.96	1	0.98	0.91	0.79	0.86	47	17	17	Carbamidomethylation; TMT10plex	42748	Septin-5 OS=Mus musculus OX=10090 GN=Septin5 PE=1 SV=2
549	114	Q80XI3	1.79	267.7	1015600	1062100	1019800	1052000	1009200	959700	0.96	1	0.96	0.99	0.95	0.9	1015600	1062100	1019800	1052000	1009200	959700	0.96	1	0.96	0.99	0.95	0.9	11	21	15	Carbamidomethylation; TMT10plex	174889	Eukaryotic translation initiation factor 4 gamma 3 OS=Mus musculus OX=10090 GN=Eif4g3 PE=1 SV=2
503	2161	P16406	5.57	267.4	1633500	1690300	1687400	1547800	1820200	1451300	0.97	1	1	0.92	1.08	0.86	1633500	1690300	1687400	1547800	1820200	1451300	0.97	1	1	0.92	1.08	0.86	22	19	19	Carbamidomethylation; TMT10plex	107956	Glutamyl aminopeptidase OS=Mus musculus OX=10090 GN=Enpep PE=1 SV=1
669	632	Q9D394	9.5	267.2	2283200	2734000	2322700	2183500	2350600	2269700	0.84	1	0.85	0.8	0.86	0.83	2283200	2734000	2322700	2183500	2350600	2269700	0.84	1	0.85	0.8	0.86	0.83	35	18	16	Carbamidomethylation; TMT10plex	53007	Protein RUFY3 OS=Mus musculus OX=10090 GN=Rufy3 PE=1 SV=1
759	8281	Q8CGY8	7.21	267.18	1693300	1652100	1678500	1625300	1399500	1602500	1.02	1	1.02	0.98	0.85	0.97	1693300	1652100	1678500	1625300	1399500	1602500	1.02	1	1.02	0.98	0.85	0.97	23	18	18	Carbamidomethylation; TMT10plex	116952	UDP-N-acetylglucosamine--peptide N-acetylglucosaminyltransferase 110 kDa subunit OS=Mus musculus OX=10090 GN=Ogt PE=1 SV=2
662	3100	Q9QY81	11.7	267.15	1092300	1139900	1037600	1054300	884720	975190	0.96	1	0.91	0.92	0.78	0.86	1092300	1139900	1037600	1054300	884720	975190	0.96	1	0.91	0.92	0.78	0.86	13	19	19	Carbamidomethylation; TMT10plex	204099	Nuclear pore membrane glycoprotein 210 OS=Mus musculus OX=10090 GN=Nup210 PE=1 SV=2
761	12363	Q9QZD8	28.67	267.14	969480	1192700	1003800	966660	764940	1023200	0.81	1	0.84	0.81	0.64	0.86	969480	1192700	1003800	966660	764940	1023200	0.81	1	0.84	0.81	0.64	0.86	53	14	14	Carbamidomethylation; TMT10plex	31715	Mitochondrial dicarboxylate carrier OS=Mus musculus OX=10090 GN=Slc25a10 PE=1 SV=2
404	8925	P62192	7.57	267.11	3927900	4042300	3817300	3753700	3349100	3587100	0.97	1	0.94	0.93	0.83	0.89	3927900	4042300	3817300	3753700	3349100	3587100	0.97	1	0.94	0.93	0.83	0.89	46	20	18	Carbamidomethylation; TMT10plex	49185	26S proteasome regulatory subunit 4 OS=Mus musculus OX=10090 GN=Psmc1 PE=1 SV=1
528	4396	Q4PZA2	15.57	267.11	3452500	3245600	3575500	2691300	2635200	2711300	1.06	1	1.1	0.83	0.81	0.84	3452500	3245600	3575500	2691300	2635200	2711300	1.06	1	1.1	0.83	0.81	0.84	25	19	19	Carbamidomethylation; TMT10plex	87073	Endothelin-converting enzyme 1 OS=Mus musculus OX=10090 GN=Ece1 PE=1 SV=1
425	738	Q9Z1F9	4.37	266.83	7212100	6893500	7160700	6972100	6316500	7217600	1.05	1	1.04	1.01	0.92	1.05	7212100	6893500	7160700	6972100	6316500	7217600	1.05	1	1.04	1.01	0.92	1.05	36	22	22	Carbamidomethylation; TMT10plex	70569	SUMO-activating enzyme subunit 2 OS=Mus musculus OX=10090 GN=Uba2 PE=1 SV=1
826	7191	Q02248	8.24	266.62	1629200	1737700	1447500	1664600	1767300	1688900	0.94	1	0.83	0.96	1.02	0.97	1629200	1737700	1447500	1664600	1767300	1688900	0.94	1	0.83	0.96	1.02	0.97	18	15	12	Carbamidomethylation; TMT10plex	85471	Catenin beta-1 OS=Mus musculus OX=10090 GN=Ctnnb1 PE=1 SV=1
1244	4665	P28352	11.86	266.62	4310400	5065900	4420300	4096400	5708600	4306500	0.85	1	0.87	0.81	1.13	0.85	4310400	5065900	4420300	4096400	5708600	4306500	0.85	1	0.87	0.81	1.13	0.85	45	11	11	Carbamidomethylation; TMT10plex	35490	DNA-(apurinic or apyrimidinic site) lyase OS=Mus musculus OX=10090 GN=Apex1 PE=1 SV=2
734	3750	Q9WV34	1.94	266.55	2255700	2289500	2173700	2203900	2199000	2036900	0.99	1	0.95	0.96	0.96	0.89	2255700	2289500	2173700	2203900	2199000	2036900	0.99	1	0.95	0.96	0.96	0.89	31	18	16	Carbamidomethylation; TMT10plex	61555	MAGUK p55 subfamily member 2 OS=Mus musculus OX=10090 GN=Mpp2 PE=1 SV=1
920	15712	P35293	2.86	266.06	4749700	4805400	4445600	4584200	4596700	4188100	0.99	1	0.93	0.95	0.96	0.87	4749700	4805400	4445600	4584200	4596700	4188100	0.99	1	0.93	0.95	0.96	0.87	71	12	12	Carbamidomethylation; TMT10plex	23035	Ras-related protein Rab-18 OS=Mus musculus OX=10090 GN=Rab18 PE=1 SV=2
231	13091	Q9D8N0	4.09	266.03	31157000	30059000	29683000	31728000	28197000	32326000	1.04	1	0.99	1.06	0.94	1.08	31157000	30059000	29683000	31728000	28197000	32326000	1.04	1	0.99	1.06	0.94	1.08	44	21	21	Carbamidomethylation; TMT10plex; Oxidation (M)	50061	Elongation factor 1-gamma OS=Mus musculus OX=10090 GN=Eef1g PE=1 SV=3
431	3854	Q9Z2I9	4.2	266.03	10967000	11212000	11104000	11096000	9926700	9934100	0.98	1	0.99	0.99	0.89	0.89	10967000	11212000	11104000	11096000	9926700	9934100	0.98	1	0.99	0.99	0.89	0.89	38	19	19	Carbamidomethylation; TMT10plex	50114	Succinate--CoA ligase [ADP-forming] subunit beta mitochondrial OS=Mus musculus OX=10090 GN=Sucla2 PE=1 SV=2
421	177	Q8R2E9	57.01	265.55	9593200	11611000	8524600	8909100	16479000	9166400	0.83	1	0.73	0.77	1.42	0.79	9593200	11611000	8524600	8909100	16479000	9166400	0.83	1	0.73	0.77	1.42	0.79	36	18	17	Carbamidomethylation; TMT10plex; Oxidation (M)	53518	ERO1-like protein beta OS=Mus musculus OX=10090 GN=Ero1b PE=1 SV=1
727	1310	Q7TQH0	7.27	265.43	1987300	2062700	2014500	2160100	1874600	2418600	0.96	1	0.98	1.05	0.91	1.17	1987300	2062700	2014500	2160100	1874600	2418600	0.96	1	0.98	1.05	0.91	1.17	17	16	15	TMT10plex	110649	Ataxin-2-like protein OS=Mus musculus OX=10090 GN=Atxn2l PE=1 SV=1
427	2165	Q922Q8	4.64	265.06	19695000	19825000	19817000	19739000	20482000	22597000	0.99	1	1	1	1.03	1.14	19695000	19825000	19817000	19739000	20482000	22597000	0.99	1	1	1	1.03	1.14	61	18	18	Carbamidomethylation; TMT10plex	34877	Leucine-rich repeat-containing protein 59 OS=Mus musculus OX=10090 GN=Lrrc59 PE=1 SV=1
592	2501	Q921F2	6.95	264.95	1599000	1513000	1485800	1386700	1267600	1345000	1.06	1	0.98	0.92	0.84	0.89	1599000	1513000	1485800	1386700	1267600	1345000	1.06	1	0.98	0.92	0.84	0.89	31	12	12	Carbamidomethylation; TMT10plex; Oxidation (M)	44548	TAR DNA-binding protein 43 OS=Mus musculus OX=10090 GN=Tardbp PE=1 SV=1
708	14816	Q9R0H0	2	264.85	2715500	2684800	2653500	2549600	2836900	2747600	1.01	1	0.99	0.95	1.06	1.02	2715500	2684800	2653500	2549600	2836900	2747600	1.01	1	0.99	0.95	1.06	1.02	32	17	17	Carbamidomethylation; TMT10plex	74649	Peroxisomal acyl-coenzyme A oxidase 1 OS=Mus musculus OX=10090 GN=Acox1 PE=1 SV=5
684	3716	P01899	25.56	264.84	1701200	1792000	1598800	1583000	2420500	1545400	0.95	1	0.89	0.88	1.35	0.86	1701200	1792000	1598800	1583000	2420500	1545400	0.95	1	0.89	0.88	1.35	0.86	29	14	8	Carbamidomethylation; TMT10plex	40836	H-2 class I histocompatibility antigen D-B alpha chain OS=Mus musculus OX=10090 GN=H2-D1 PE=1 SV=2
1260	9519	Q80WJ7	4.35	264.8	794490	840270	822400	798510	741410	768750	0.95	1	0.98	0.95	0.88	0.91	794490	840270	822400	798510	741410	768750	0.95	1	0.98	0.95	0.88	0.91	23	10	10	TMT10plex	63846	Protein LYRIC OS=Mus musculus OX=10090 GN=Mtdh PE=1 SV=1
665	1961	Q9CWK8	7.35	264.72	1437000	1580000	1510100	1357000	1314200	1315800	0.91	1	0.96	0.86	0.83	0.83	1437000	1580000	1510100	1357000	1314200	1315800	0.91	1	0.96	0.86	0.83	0.83	35	18	16	TMT10plex	58471	Sorting nexin-2 OS=Mus musculus OX=10090 GN=Snx2 PE=1 SV=2
777	5692	Q91WK2	9.4	264.7	1671400	1716200	1664600	1583100	1379000	1508600	0.97	1	0.97	0.92	0.8	0.88	1671400	1716200	1664600	1583100	1379000	1508600	0.97	1	0.97	0.92	0.8	0.88	45	12	12	Carbamidomethylation; TMT10plex	39832	Eukaryotic translation initiation factor 3 subunit H OS=Mus musculus OX=10090 GN=Eif3h PE=1 SV=1
538	3414	P62827	4.12	264.63	6668600	6506900	6273700	5914900	6331400	6013500	1.02	1	0.96	0.91	0.97	0.92	6668600	6506900	6273700	5914900	6331400	6013500	1.02	1	0.96	0.91	0.97	0.92	52	12	12	Carbamidomethylation; TMT10plex	24423	GTP-binding nuclear protein Ran OS=Mus musculus OX=10090 GN=Ran PE=1 SV=3
155	140	P61982	9.62	264.62	4668400	5306700	4261900	4431000	5322300	5214800	0.88	1	0.8	0.83	1	0.98	4668400	5306700	4261900	4431000	5322300	5214800	0.88	1	0.8	0.83	1	0.98	34	15	8	Carbamidomethylation; TMT10plex	28303	14-3-3 protein gamma OS=Mus musculus OX=10090 GN=Ywhag PE=1 SV=2
722	1399	O35841	5.77	264.54	4278700	4334400	4499900	4178100	3855300	4205800	0.99	1	1.04	0.96	0.89	0.97	4278700	4334400	4499900	4178100	3855300	4205800	0.99	1	1.04	0.96	0.89	0.97	28	14	14	TMT10plex	56785	Apoptosis inhibitor 5 OS=Mus musculus OX=10090 GN=Api5 PE=1 SV=2
606	2314	Q8R0X7	13.58	264.54	3624700	4120400	4038500	3692800	3775700	3053900	0.88	1	0.98	0.9	0.92	0.74	3624700	4120400	4038500	3692800	3775700	3053900	0.88	1	0.98	0.9	0.92	0.74	24	15	15	TMT10plex; Oxidation (M)	63677	Sphingosine-1-phosphate lyase 1 OS=Mus musculus OX=10090 GN=Sgpl1 PE=1 SV=1
672	7378	Q810A7	9.86	264.33	2166400	2045700	2168900	1829700	1730200	2149000	1.06	1	1.06	0.89	0.85	1.05	2166400	2045700	2168900	1829700	1730200	2149000	1.06	1	1.06	0.89	0.85	1.05	22	18	18	Carbamidomethylation; TMT10plex	101965	ATP-dependent RNA helicase DDX42 OS=Mus musculus OX=10090 GN=Ddx42 PE=1 SV=3
443	1133	P43406	7.42	264.3	2249400	2305300	2116600	1834700	2174900	2010000	0.98	1	0.92	0.8	0.94	0.87	2249400	2305300	2116600	1834700	2174900	2010000	0.98	1	0.92	0.8	0.94	0.87	23	23	23	Carbamidomethylation; TMT10plex	115360	Integrin alpha-V OS=Mus musculus OX=10090 GN=Itgav PE=1 SV=2
536	15689	Q01405	6.85	264.28	1860500	1995200	1843700	1632900	1799700	1626100	0.93	1	0.92	0.82	0.9	0.81	1860500	1995200	1843700	1632900	1799700	1626100	0.93	1	0.92	0.82	0.9	0.81	21	19	15	Carbamidomethylation; TMT10plex	86162	Protein transport protein Sec23A OS=Mus musculus OX=10090 GN=Sec23a PE=1 SV=2
351	52	A2AN08	3.15	264.25	1414800	1296000	1249300	1289800	1184300	1308900	1.09	1	0.96	1	0.91	1.01	1414800	1296000	1249300	1289800	1184300	1308900	1.09	1	0.96	1	0.91	1.01	7	31	31	Carbamidomethylation; TMT10plex	572298	E3 ubiquitin-protein ligase UBR4 OS=Mus musculus OX=10090 GN=Ubr4 PE=1 SV=1
567	944	P08752	61.78	264.22	584960	696410	600460	579080	1196200	484120	0.84	1	0.86	0.83	1.72	0.7	584960	696410	600460	579080	1196200	484120	0.84	1	0.86	0.83	1.72	0.7	29	14	9	Carbamidomethylation; TMT10plex	40489	Guanine nucleotide-binding protein G(i) subunit alpha-2 OS=Mus musculus OX=10090 GN=Gnai2 PE=1 SV=5
326	624	Q99MR6	1.82	263.82	5205000	5236100	5388400	5228900	5067200	5395100	0.99	1	1.03	1	0.97	1.03	5205000	5236100	5388400	5228900	5067200	5395100	0.99	1	1.03	1	0.97	1.03	28	25	25	Carbamidomethylation; TMT10plex	100452	Serrate RNA effector molecule homolog OS=Mus musculus OX=10090 GN=Srrt PE=1 SV=1
626	420	Q9JLV5	5.41	263.73	1301900	1365300	1360000	1261000	1178100	1286400	0.95	1	1	0.92	0.86	0.94	1301900	1365300	1360000	1261000	1178100	1286400	0.95	1	1	0.92	0.86	0.94	27	20	19	Carbamidomethylation; TMT10plex	88948	Cullin-3 OS=Mus musculus OX=10090 GN=Cul3 PE=1 SV=1
474	1605	Q60668	7.21	263.54	7709200	8701900	8616600	9281400	9157900	8841100	0.89	1	0.99	1.07	1.05	1.02	7709200	8701900	8616600	9281400	9157900	8841100	0.89	1	0.99	1.07	1.05	1.02	39	19	17	Carbamidomethylation; TMT10plex; Oxidation (M)	38354	Heterogeneous nuclear ribonucleoprotein D0 OS=Mus musculus OX=10090 GN=Hnrnpd PE=1 SV=2
444	1462	E9QAT4	3.99	263.25	1630100	1570500	1686400	1797600	1727700	1935600	1.04	1	1.07	1.14	1.1	1.23	1630100	1570500	1686400	1797600	1727700	1935600	1.04	1	1.07	1.14	1.1	1.23	15	26	26	Carbamidomethylation; TMT10plex	254200	Protein transport protein Sec16A OS=Mus musculus OX=10090 GN=Sec16a PE=1 SV=1
454	3416	Q8BFY9	11.15	263.23	1708900	1673700	1807400	1632000	2139400	1461700	1.02	1	1.08	0.98	1.28	0.87	1708900	1673700	1807400	1632000	2139400	1461700	1.02	1	1.08	0.98	1.28	0.87	24	20	17	Carbamidomethylation; TMT10plex	102357	Transportin-1 OS=Mus musculus OX=10090 GN=Tnpo1 PE=1 SV=2
764	6278	Q9CX34	4.46	263.21	2114300	2175800	2222000	2239500	1956000	2170800	0.97	1	1.02	1.03	0.9	1	2114300	2175800	2222000	2239500	1956000	2170800	0.97	1	1.02	1.03	0.9	1	44	13	13	Carbamidomethylation; TMT10plex	38159	Protein SGT1 homolog OS=Mus musculus OX=10090 GN=Sugt1 PE=1 SV=3
103	9	P62631	5.4	262.95	8479900	8331000	8025600	8079000	7190000	7513500	1.02	1	0.96	0.97	0.86	0.9	8479900	8331000	8025600	8079000	7190000	7513500	1.02	1	0.96	0.97	0.86	0.9	17	21	11	TMT10plex; Oxidation (M)	50454	Elongation factor 1-alpha 2 OS=Mus musculus OX=10090 GN=Eef1a2 PE=1 SV=1
492	2642	Q80TJ1	11.97	262.95	2806000	2885600	3005200	3060200	3732400	2338400	0.97	1	1.04	1.06	1.29	0.81	2806000	2885600	3005200	3060200	3732400	2338400	0.97	1	1.04	1.06	1.29	0.81	17	20	20	Carbamidomethylation; TMT10plex	153112	Calcium-dependent secretion activator 1 OS=Mus musculus OX=10090 GN=Cadps PE=1 SV=3
855	15723	Q9WUQ2	6.8	262.9	1878300	2000800	1908000	1892600	1767700	1602900	0.94	1	0.95	0.95	0.88	0.8	1878300	2000800	1908000	1892600	1767700	1602900	0.94	1	0.95	0.95	0.88	0.8	37	14	14	Carbamidomethylation; TMT10plex	45437	Prolactin regulatory element-binding protein OS=Mus musculus OX=10090 GN=Preb PE=1 SV=1
583	4401	P62880	25.74	262.48	709340	744340	697300	598980	651290	459770	0.95	1	0.94	0.8	0.87	0.62	709340	744340	697300	598980	651290	459770	0.95	1	0.94	0.8	0.87	0.62	26	12	7	Carbamidomethylation; TMT10plex; Oxidation (M)	37331	Guanine nucleotide-binding protein G(I)/G(S)/G(T) subunit beta-2 OS=Mus musculus OX=10090 GN=Gnb2 PE=1 SV=3
515	9315	P62835	3.79	262.44	448100	575060	436560	354660	509550	496560	0.78	1	0.76	0.62	0.89	0.86	448100	575060	436560	354660	509550	496560	0.78	1	0.76	0.62	0.89	0.86	15	11	2	Carbamidomethylation; TMT10plex	20987	Ras-related protein Rap-1A OS=Mus musculus OX=10090 GN=Rap1a PE=1 SV=1
1101	4646	Q921H8	25.24	262.42	777150	560360	748960	908290	712660	946110	1.39	1	1.34	1.62	1.27	1.69	777150	560360	748960	908290	712660	946110	1.39	1	1.34	1.62	1.27	1.69	42	10	10	Carbamidomethylation; TMT10plex	43953	3-ketoacyl-CoA thiolase A peroxisomal OS=Mus musculus OX=10090 GN=Acaa1a PE=1 SV=1
666	12657	Q6PGL7	14.06	262.4	1194400	1025400	1317100	1291500	989680	1396600	1.16	1	1.28	1.26	0.97	1.36	1194400	1025400	1317100	1291500	989680	1396600	1.16	1	1.28	1.26	0.97	1.36	21	20	20	TMT10plex	145310	WASH complex subunit 2 OS=Mus musculus OX=10090 GN=Washc2 PE=1 SV=1
979	3779	Q60676	5.94	262.32	1400400	1424500	1307500	1380300	1216200	1166400	0.98	1	0.92	0.97	0.85	0.82	1400400	1424500	1307500	1380300	1216200	1166400	0.98	1	0.92	0.97	0.85	0.82	29	12	12	Carbamidomethylation; TMT10plex	56877	Serine/threonine-protein phosphatase 5 OS=Mus musculus OX=10090 GN=Ppp5c PE=1 SV=3
580	1167	Q6R0H7	2.44	262.11	2292000	2344000	2245900	2165300	2166000	2327100	0.98	1	0.96	0.92	0.92	0.99	2292000	2344000	2245900	2165300	2166000	2327100	0.98	1	0.96	0.92	0.92	0.99	13	15	14	Carbamidomethylation; TMT10plex	121505	Guanine nucleotide-binding protein G(s) subunit alpha isoforms XLas OS=Mus musculus OX=10090 GN=Gnas PE=1 SV=1
47	84	P68134	3.26	262	4735800	3657100	4607700	3534100	3740000	3678100	1.29	1	1.26	0.97	1.02	1.01	4735800	3657100	4607700	3534100	3740000	3678100	1.29	1	1.26	0.97	1.02	1.01	4	15	1	TMT10plex; Oxidation (M)	42051	Actin alpha skeletal muscle OS=Mus musculus OX=10090 GN=Acta1 PE=1 SV=1
47	85	P68033	3.26	262	4735800	3657100	4607700	3534100	3740000	3678100	1.29	1	1.26	0.97	1.02	1.01	4735800	3657100	4607700	3534100	3740000	3678100	1.29	1	1.26	0.97	1.02	1.01	4	15	1	TMT10plex; Oxidation (M)	42019	Actin alpha cardiac muscle 1 OS=Mus musculus OX=10090 GN=Actc1 PE=1 SV=1
1046	1023	Q924C1	7.98	261.96	1153800	1229800	1286000	1246600	1058000	1308400	0.94	1	1.05	1.01	0.86	1.06	1153800	1229800	1286000	1246600	1058000	1308400	0.94	1	1.05	1.01	0.86	1.06	15	14	14	Carbamidomethylation; TMT10plex	136973	Exportin-5 OS=Mus musculus OX=10090 GN=Xpo5 PE=1 SV=1
966	2160	Q61644	4.26	261.94	773750	774140	864160	835660	875610	901650	1	1	1.12	1.08	1.13	1.16	773750	774140	864160	835660	875610	901650	1	1	1.12	1.08	1.13	1.16	38	14	13	Carbamidomethylation; TMT10plex	50575	Protein kinase C and casein kinase substrate in neurons protein 1 OS=Mus musculus OX=10090 GN=Pacsin1 PE=1 SV=1
480	117	Q99L47	18.1	261.86	7986300	6582600	9208100	7900700	8114800	7536400	1.21	1	1.4	1.2	1.23	1.14	7986300	6582600	9208100	7900700	8114800	7536400	1.21	1	1.4	1.2	1.23	1.14	29	11	11	Carbamidomethylation; TMT10plex; Oxidation (M)	41656	Hsc70-interacting protein OS=Mus musculus OX=10090 GN=St13 PE=1 SV=1
1337	6050	P47753	26.04	261.66	760020	616270	798720	683740	525120	645390	1.23	1	1.3	1.11	0.85	1.05	760020	616270	798720	683740	525120	645390	1.23	1	1.3	1.11	0.85	1.05	34	10	7	Carbamidomethylation; TMT10plex	32940	F-actin-capping protein subunit alpha-1 OS=Mus musculus OX=10090 GN=Capza1 PE=1 SV=4
635	805	Q6P542	3.62	261.66	1649600	1772100	1765000	1624000	1590000	1673700	0.93	1	1	0.92	0.9	0.94	1649600	1772100	1765000	1624000	1590000	1673700	0.93	1	1	0.92	0.9	0.94	25	15	15	Carbamidomethylation; TMT10plex	94945	ATP-binding cassette sub-family F member 1 OS=Mus musculus OX=10090 GN=Abcf1 PE=1 SV=1
797	894	Q9DC61	6.8	261.65	2834000	2505800	2944600	2906600	2488100	2473600	1.13	1	1.18	1.16	0.99	0.99	2834000	2505800	2944600	2906600	2488100	2473600	1.13	1	1.18	1.16	0.99	0.99	26	14	14	Carbamidomethylation; TMT10plex	58279	Mitochondrial-processing peptidase subunit alpha OS=Mus musculus OX=10090 GN=Pmpca PE=1 SV=1
956	1087	Q8CH18	3.56	261.57	1693600	1521800	1606500	1612100	1600800	1730300	1.11	1	1.06	1.06	1.05	1.14	1693600	1521800	1606500	1612100	1600800	1730300	1.11	1	1.06	1.06	1.05	1.14	13	12	12	Carbamidomethylation; TMT10plex	132060	Cell division cycle and apoptosis regulator protein 1 OS=Mus musculus OX=10090 GN=Ccar1 PE=1 SV=1
380	1407	P37913	5.07	261.52	2724400	2868100	2642200	2414100	2518800	2501600	0.95	1	0.92	0.84	0.88	0.87	2724400	2868100	2642200	2414100	2518800	2501600	0.95	1	0.92	0.84	0.88	0.87	31	24	24	Carbamidomethylation; TMT10plex	102290	DNA ligase 1 OS=Mus musculus OX=10090 GN=Lig1 PE=1 SV=2
656	998	Q9WV54	13.05	261.46	4308600	4504400	4809300	4202700	5914000	5043900	0.96	1	1.07	0.93	1.31	1.12	4308600	4504400	4809300	4202700	5914000	5043900	0.96	1	1.07	0.93	1.31	1.12	35	16	16	Carbamidomethylation; TMT10plex; Oxidation (M)	44670	Acid ceramidase OS=Mus musculus OX=10090 GN=Asah1 PE=1 SV=1
579	10532	P32067	4.72	261.4	8566300	9820500	8859200	8675600	8782800	8888200	0.87	1	0.9	0.88	0.89	0.91	8566300	9820500	8859200	8675600	8782800	8888200	0.87	1	0.9	0.88	0.89	0.91	39	19	19	Carbamidomethylation; TMT10plex	47756	Lupus La protein homolog OS=Mus musculus OX=10090 GN=Ssb PE=1 SV=1
416	387	Q3TEA8	3.28	261.35	13438000	14752000	14857000	13598000	14631000	13756000	0.91	1	1.01	0.92	0.99	0.93	13438000	14752000	14857000	13598000	14631000	13756000	0.91	1	1.01	0.92	0.99	0.93	31	21	21	Carbamidomethylation; TMT10plex	60867	Heterochromatin protein 1-binding protein 3 OS=Mus musculus OX=10090 GN=Hp1bp3 PE=1 SV=1
1177	1482	P70697	2.29	261.2	1626000	1612400	1710300	1616400	1587300	1751600	1.01	1	1.06	1	0.98	1.09	1626000	1612400	1710300	1616400	1587300	1751600	1.01	1	1.06	1	0.98	1.09	37	11	11	Carbamidomethylation; TMT10plex	40692	Uroporphyrinogen decarboxylase OS=Mus musculus OX=10090 GN=Urod PE=1 SV=2
913	9993	P40336	8.91	261.1	2680800	2810800	2506700	2386000	2276700	2436200	0.95	1	0.89	0.85	0.81	0.87	2680800	2810800	2506700	2386000	2276700	2436200	0.95	1	0.89	0.85	0.81	0.87	39	11	10	TMT10plex; Oxidation (M)	38114	Vacuolar protein sorting-associated protein 26A OS=Mus musculus OX=10090 GN=Vps26a PE=1 SV=1
390	5607	Q9CS42	6.63	260.97	1366400	1598000	1467300	1678000	1441900	1451100	0.86	1	0.92	1.05	0.9	0.91	1366400	1598000	1467300	1678000	1441900	1451100	0.86	1	0.92	1.05	0.9	0.91	25	14	7	Carbamidomethylation; TMT10plex	34786	Ribose-phosphate pyrophosphokinase 2 OS=Mus musculus OX=10090 GN=Prps2 PE=1 SV=4
488	596	G3X9K3	10.69	260.94	901230	867750	997070	923170	785400	896180	1.04	1	1.15	1.06	0.91	1.03	901230	867750	997070	923170	785400	896180	1.04	1	1.15	1.06	0.91	1.03	6	22	11	Carbamidomethylation; TMT10plex	208498	Brefeldin A-inhibited guanine nucleotide-exchange protein 1 OS=Mus musculus OX=10090 GN=Arfgef1 PE=1 SV=1
541	2663	Q99JY9	3.21	260.58	3859800	3779100	3449100	3527100	3527300	3373300	1.02	1	0.91	0.93	0.93	0.89	3859800	3779100	3449100	3527100	3527300	3373300	1.02	1	0.91	0.93	0.93	0.89	51	19	19	Carbamidomethylation; TMT10plex	47357	Actin-related protein 3 OS=Mus musculus OX=10090 GN=Actr3 PE=1 SV=3
80	11	P10126	4.32	260.51	59897000	58142000	52892000	56698000	53082000	55716000	1.03	1	0.91	0.98	0.91	0.96	59897000	58142000	52892000	56698000	53082000	55716000	1.03	1	0.91	0.98	0.91	0.96	18	20	10	TMT10plex; Oxidation (M)	50114	Elongation factor 1-alpha 1 OS=Mus musculus OX=10090 GN=Eef1a1 PE=1 SV=3
411	741	A6H8H2	4.42	260.48	1751800	1878200	1811700	1660700	1654800	1644000	0.93	1	0.96	0.88	0.88	0.88	1751800	1878200	1811700	1660700	1654800	1644000	0.93	1	0.96	0.88	0.88	0.88	17	27	27	Carbamidomethylation; TMT10plex	211456	DENN domain-containing protein 4C OS=Mus musculus OX=10090 GN=Dennd4c PE=1 SV=1
814	15794	P49722	9.47	260.09	2902000	2689200	2992500	3358800	2838700	3109500	1.08	1	1.11	1.25	1.06	1.16	2902000	2689200	2992500	3358800	2838700	3109500	1.08	1	1.11	1.25	1.06	1.16	63	14	14	Carbamidomethylation; TMT10plex	25927	Proteasome subunit alpha type-2 OS=Mus musculus OX=10090 GN=Psma2 PE=1 SV=3
1334	15748	P28063	5.13	259.78	1666900	1832700	1627700	1881600	1616600	1585300	0.91	1	0.89	1.03	0.88	0.87	1666900	1832700	1627700	1881600	1616600	1585300	0.91	1	0.89	1.03	0.88	0.87	46	11	11	Carbamidomethylation; TMT10plex	30260	Proteasome subunit beta type-8 OS=Mus musculus OX=10090 GN=Psmb8 PE=1 SV=2
577	5024	Q9JK81	47.76	259.76	2445500	2379700	2226400	2392600	4043400	2217900	1.03	1	0.94	1.01	1.7	0.93	2445500	2379700	2226400	2392600	4043400	2217900	1.03	1	0.94	1.01	1.7	0.93	49	15	15	Carbamidomethylation; TMT10plex	42723	UPF0160 protein MYG1 mitochondrial OS=Mus musculus OX=10090 GN=Myg1 PE=1 SV=1
216	556	Q91WQ3	7.23	259.65	9353700	10565000	9084100	8564400	8806000	8820300	0.89	1	0.86	0.81	0.83	0.83	9353700	10565000	9084100	8564400	8806000	8820300	0.89	1	0.86	0.81	0.83	0.83	53	28	28	Carbamidomethylation; TMT10plex	59105	Tyrosine--tRNA ligase cytoplasmic OS=Mus musculus OX=10090 GN=Yars1 PE=1 SV=3
806	1314	Q8CCJ3	3.65	259.46	2162100	2202200	2034200	2071900	2122000	1823600	0.98	1	0.92	0.94	0.96	0.83	2162100	2202200	2034200	2071900	2122000	1823600	0.98	1	0.92	0.94	0.96	0.83	24	18	17	Carbamidomethylation; TMT10plex	89520	E3 UFM1-protein ligase 1 OS=Mus musculus OX=10090 GN=Ufl1 PE=1 SV=2
384	3233	P15532	29.97	259.27	2904700	3642200	2744400	2672400	4329900	3355000	0.8	1	0.75	0.73	1.19	0.92	2904700	3642200	2744400	2672400	4329900	3355000	0.8	1	0.75	0.73	1.19	0.92	44	11	6	Carbamidomethylation; TMT10plex; Oxidation (M)	17208	Nucleoside diphosphate kinase A OS=Mus musculus OX=10090 GN=Nme1 PE=1 SV=1
670	4659	Q9EQF6	5.39	259.25	3975600	3796900	4350100	3978500	3755400	4227500	1.05	1	1.15	1.05	0.99	1.11	3975600	3796900	4350100	3978500	3755400	4227500	1.05	1	1.15	1.05	0.99	1.11	37	16	16	Carbamidomethylation; TMT10plex	61516	Dihydropyrimidinase-related protein 5 OS=Mus musculus OX=10090 GN=Dpysl5 PE=1 SV=1
377	1974	P50518	5.72	259.1	7572300	7294000	7796400	7201900	6685400	7096400	1.04	1	1.07	0.99	0.92	0.97	7572300	7294000	7796400	7201900	6685400	7096400	1.04	1	1.07	0.99	0.92	0.97	50	17	17	TMT10plex; Oxidation (M)	26157	V-type proton ATPase subunit E 1 OS=Mus musculus OX=10090 GN=Atp6v1e1 PE=1 SV=2
615	7745	Q61035	3.28	259.03	1925300	1876800	1800300	1776200	1697700	1780500	1.03	1	0.96	0.95	0.9	0.95	1925300	1876800	1800300	1776200	1697700	1780500	1.03	1	0.96	0.95	0.9	0.95	30	17	14	Carbamidomethylation; TMT10plex	57432	Histidine--tRNA ligase cytoplasmic OS=Mus musculus OX=10090 GN=Hars1 PE=1 SV=2
746	8477	P28652	11.5	259.02	454540	475200	440770	449740	369890	449710	0.96	1	0.93	0.95	0.78	0.95	454540	475200	440770	449740	369890	449710	0.96	1	0.93	0.95	0.78	0.95	18	14	7	Carbamidomethylation; TMT10plex	60461	Calcium/calmodulin-dependent protein kinase type II subunit beta OS=Mus musculus OX=10090 GN=Camk2b PE=1 SV=2
563	4353	P54823	6.55	258.97	1743900	2116600	1867400	1888600	1786300	1838600	0.82	1	0.88	0.89	0.84	0.87	1743900	2116600	1867400	1888600	1786300	1838600	0.82	1	0.88	0.89	0.84	0.87	36	17	17	Carbamidomethylation; TMT10plex	54192	Probable ATP-dependent RNA helicase DDX6 OS=Mus musculus OX=10090 GN=Ddx6 PE=1 SV=1
705	15789	Q9Z2U0	9.23	258.6	2322600	2244100	2639600	2641000	2126900	2601000	1.03	1	1.18	1.18	0.95	1.16	2322600	2244100	2639600	2641000	2126900	2601000	1.03	1	1.18	1.18	0.95	1.16	49	9	9	Carbamidomethylation; TMT10plex; Oxidation (M)	27855	Proteasome subunit alpha type-7 OS=Mus musculus OX=10090 GN=Psma7 PE=1 SV=1
561	51	P63005	2.59	258.55	2295100	2226700	2186800	2248600	2375600	2177800	1.03	1	0.98	1.01	1.07	0.98	2295100	2226700	2186800	2248600	2375600	2177800	1.03	1	0.98	1.01	1.07	0.98	32	14	13	Carbamidomethylation; TMT10plex	46670	Platelet-activating factor acetylhydrolase IB subunit alpha OS=Mus musculus OX=10090 GN=Pafah1b1 PE=1 SV=2
594	9604	Q8K1R3	6.53	258.5	3610600	3779600	3419600	3428600	3191200	3562900	0.96	1	0.9	0.91	0.84	0.94	3610600	3779600	3419600	3428600	3191200	3562900	0.96	1	0.9	0.91	0.84	0.94	23	19	19	Carbamidomethylation; TMT10plex	85683	Polyribonucleotide nucleotidyltransferase 1 mitochondrial OS=Mus musculus OX=10090 GN=Pnpt1 PE=1 SV=1
796	13892	Q9JIF0	9.54	258.48	5862900	7453300	6252700	6702300	7113600	7064200	0.79	1	0.84	0.9	0.95	0.95	5862900	7453300	6252700	6702300	7113600	7064200	0.79	1	0.84	0.9	0.95	0.95	38	14	12	Carbamidomethylation; TMT10plex	42436	Protein arginine N-methyltransferase 1 OS=Mus musculus OX=10090 GN=Prmt1 PE=1 SV=1
711	15692	Q3B7Z2	5.21	258.48	3484100	3760300	3243400	3320900	3295900	3379200	0.93	1	0.86	0.88	0.88	0.9	3484100	3760300	3243400	3320900	3295900	3379200	0.93	1	0.86	0.88	0.88	0.9	22	17	17	Carbamidomethylation; TMT10plex	88797	Oxysterol-binding protein 1 OS=Mus musculus OX=10090 GN=Osbp PE=1 SV=3
608	1013	Q8BFZ9	5.03	258.41	2967700	2859900	3189100	2923600	2773300	2789200	1.04	1	1.12	1.02	0.97	0.98	2967700	2859900	3189100	2923600	2773300	2789200	1.04	1	1.12	1.02	0.97	0.98	34	14	10	Carbamidomethylation; TMT10plex	37873	Erlin-2 OS=Mus musculus OX=10090 GN=Erlin2 PE=1 SV=1
689	976	P42232	4.7	258.37	465470	391460	540740	429520	334190	412420	1.19	1	1.38	1.1	0.85	1.05	465470	391460	540740	429520	334190	412420	1.19	1	1.38	1.1	0.85	1.05	3	15	2	Carbamidomethylation; TMT10plex	90002	Signal transducer and activator of transcription 5B OS=Mus musculus OX=10090 GN=Stat5b PE=1 SV=1
850	2422	P30275	10.94	258.27	3336000	3209200	3053900	3264000	2518400	3204900	1.04	1	0.95	1.02	0.78	1	3336000	3209200	3053900	3264000	2518400	3204900	1.04	1	0.95	1.02	0.78	1	35	14	14	Carbamidomethylation; TMT10plex	47004	Creatine kinase U-type mitochondrial OS=Mus musculus OX=10090 GN=Ckmt1 PE=1 SV=1
891	3379	Q7TNV0	16.31	258.22	3452000	2672900	3550000	3660000	3287900	3317900	1.29	1	1.33	1.37	1.23	1.24	3452000	2672900	3550000	3660000	3287900	3317900	1.29	1	1.33	1.37	1.23	1.24	33	12	12	Carbamidomethylation; TMT10plex	43159	Protein DEK OS=Mus musculus OX=10090 GN=Dek PE=1 SV=1
810	15719	P31324	18.91	258.12	233970	265930	231370	228450	188340	178220	0.88	1	0.87	0.86	0.71	0.67	233970	265930	231370	228450	188340	178220	0.88	1	0.87	0.86	0.71	0.67	31	11	8	Carbamidomethylation; TMT10plex	46167	cAMP-dependent protein kinase type II-beta regulatory subunit OS=Mus musculus OX=10090 GN=Prkar2b PE=1 SV=3
278	1751	Q8VEM8	4.93	258.11	20023000	20450000	18643000	19072000	21395000	19690000	0.98	1	0.91	0.93	1.05	0.96	20023000	20450000	18643000	19072000	21395000	19690000	0.98	1	0.91	0.93	1.05	0.96	41	17	17	Carbamidomethylation; TMT10plex; Oxidation (M)	39632	Phosphate carrier protein mitochondrial OS=Mus musculus OX=10090 GN=Slc25a3 PE=1 SV=1
910	8630	Q9CYR6	13.79	258.05	1650600	1710000	1554700	1876400	1718300	2061800	0.97	1	0.91	1.1	1	1.21	1650600	1710000	1554700	1876400	1718300	2061800	0.97	1	0.91	1.1	1	1.21	31	14	14	Carbamidomethylation; TMT10plex	59453	Phosphoacetylglucosamine mutase OS=Mus musculus OX=10090 GN=Pgm3 PE=1 SV=1
1176	5563	Q3UVL4	2.69	258.04	702140	773610	709470	751640	772660	722530	0.91	1	0.92	0.97	1	0.93	702140	773610	709470	751640	772660	722530	0.91	1	0.92	0.97	1	0.93	19	13	13	Carbamidomethylation; TMT10plex	86187	Vacuolar protein sorting-associated protein 51 homolog OS=Mus musculus OX=10090 GN=Vps51 PE=1 SV=2
1275	7174	O88696	4.43	257.98	1857900	1786700	1998800	1760600	1761600	1805400	1.04	1	1.12	0.99	0.99	1.01	1857900	1786700	1998800	1760600	1761600	1805400	1.04	1	1.12	0.99	0.99	1.01	41	11	11	TMT10plex	29800	ATP-dependent Clp protease proteolytic subunit mitochondrial OS=Mus musculus OX=10090 GN=Clpp PE=1 SV=1
1017	2604	P24547	26.07	257.96	2956900	1983500	3031900	2497100	1992800	2657200	1.49	1	1.53	1.26	1	1.34	2956900	1983500	3031900	2497100	1992800	2657200	1.49	1	1.53	1.26	1	1.34	30	14	13	Carbamidomethylation; TMT10plex	55815	Inosine-5'-monophosphate dehydrogenase 2 OS=Mus musculus OX=10090 GN=Impdh2 PE=1 SV=2
452	2753	P35486	5.21	257.94	6800500	6563800	6933800	6363900	6342700	6007400	1.04	1	1.06	0.97	0.97	0.92	6800500	6563800	6933800	6363900	6342700	6007400	1.04	1	1.06	0.97	0.97	0.92	39	20	20	Carbamidomethylation; TMT10plex	43232	Pyruvate dehydrogenase E1 component subunit alpha somatic form mitochondrial OS=Mus musculus OX=10090 GN=Pdha1 PE=1 SV=1
931	12446	Q8BWT1	15.37	257.74	2432000	2320500	2255700	2006500	1714400	1944400	1.05	1	0.97	0.86	0.74	0.84	2432000	2320500	2255700	2006500	1714400	1944400	1.05	1	0.97	0.86	0.74	0.84	48	13	13	Carbamidomethylation; TMT10plex	41830	3-ketoacyl-CoA thiolase mitochondrial OS=Mus musculus OX=10090 GN=Acaa2 PE=1 SV=3
893	3954	P61164	11.49	257.52	189260	163750	148910	207570	181760	191290	1.16	1	0.91	1.27	1.11	1.17	189260	163750	148910	207570	181760	191290	1.16	1	0.91	1.27	1.11	1.17	19	12	5	Carbamidomethylation; TMT10plex	42614	Alpha-centractin OS=Mus musculus OX=10090 GN=Actr1a PE=1 SV=1
639	1990	Q8BFR4	8.17	257.48	9157300	8599500	9636100	8585600	7901600	8426000	1.06	1	1.12	1	0.92	0.98	9157300	8599500	9636100	8585600	7901600	8426000	1.06	1	1.12	1	0.92	0.98	24	14	14	Carbamidomethylation; TMT10plex	61175	N-acetylglucosamine-6-sulfatase OS=Mus musculus OX=10090 GN=Gns PE=1 SV=1
602	1186	Q99J77	18.62	257.41	1598100	1597600	1572700	1585600	1135300	1415600	1	1	0.98	0.99	0.71	0.89	1598100	1597600	1572700	1585600	1135300	1415600	1	1	0.98	0.99	0.71	0.89	44	14	14	Carbamidomethylation; TMT10plex	40024	Sialic acid synthase OS=Mus musculus OX=10090 GN=Nans PE=1 SV=1
598	2155	Q99K85	3.89	257.24	7226700	7594200	7409500	6742800	7593500	7112600	0.95	1	0.98	0.89	1	0.94	7226700	7594200	7409500	6742800	7593500	7112600	0.95	1	0.98	0.89	1	0.94	43	13	13	Carbamidomethylation; TMT10plex	40473	Phosphoserine aminotransferase OS=Mus musculus OX=10090 GN=Psat1 PE=1 SV=1
1180	15760	Q78ZA7	11.38	257.13	2340000	2018800	2164200	2286300	1687400	2199200	1.16	1	1.07	1.13	0.84	1.09	2340000	2018800	2164200	2286300	1687400	2199200	1.16	1	1.07	1.13	0.84	1.09	24	10	8	Carbamidomethylation; TMT10plex; Oxidation (M)	42679	Nucleosome assembly protein 1-like 4 OS=Mus musculus OX=10090 GN=Nap1l4 PE=1 SV=1
930	8062	P50431	15.03	257.11	948640	1066500	878750	850520	791380	837150	0.89	1	0.82	0.8	0.74	0.78	948640	1066500	878750	850520	791380	837150	0.89	1	0.82	0.8	0.74	0.78	32	14	13	Carbamidomethylation; TMT10plex	52601	Serine hydroxymethyltransferase cytosolic OS=Mus musculus OX=10090 GN=Shmt1 PE=1 SV=3
514	2959	P84091	8.33	256.82	4207700	4363300	4062800	3897500	3568000	3772100	0.96	1	0.93	0.89	0.82	0.86	4207700	4363300	4062800	3897500	3568000	3772100	0.96	1	0.93	0.89	0.82	0.86	42	18	18	Carbamidomethylation; TMT10plex	49655	AP-2 complex subunit mu OS=Mus musculus OX=10090 GN=Ap2m1 PE=1 SV=1
441	6016	Q9D8E6	5.22	256.63	15731000	16044000	16081000	15857000	15048000	13931000	0.98	1	1	0.99	0.94	0.87	15731000	16044000	16081000	15857000	15048000	13931000	0.98	1	1	0.99	0.94	0.87	40	19	19	Carbamidomethylation; TMT10plex; Oxidation (M)	47154	60S ribosomal protein L4 OS=Mus musculus OX=10090 GN=Rpl4 PE=1 SV=3
638	529	Q6P5F9	3.08	256.57	3458100	3835800	3834800	3739800	3591400	3704100	0.9	1	1	0.97	0.94	0.97	3458100	3835800	3834800	3739800	3591400	3704100	0.9	1	1	0.97	0.94	0.97	21	18	18	Carbamidomethylation; TMT10plex	123093	Exportin-1 OS=Mus musculus OX=10090 GN=Xpo1 PE=1 SV=1
693	8389	P35922	7.76	256.47	3138200	3499100	3394600	2820800	2889600	3039200	0.9	1	0.97	0.81	0.83	0.87	3138200	3499100	3394600	2820800	2889600	3039200	0.9	1	0.97	0.81	0.83	0.87	29	16	14	Carbamidomethylation; TMT10plex	68989	Synaptic functional regulator FMR1 OS=Mus musculus OX=10090 GN=Fmr1 PE=1 SV=1
1613	8964	B2RXR6	25.84	256.36	246990	250230	300640	249890	231680	198030	0.99	1	1.2	1	0.93	0.79	246990	250230	300640	249890	231680	198030	0.99	1	1.2	1	0.93	0.79	10	9	9	TMT10plex	107385	Serine/threonine-protein phosphatase 6 regulatory ankyrin repeat subunit B OS=Mus musculus OX=10090 GN=Ankrd44 PE=1 SV=1
605	9436	Q8C7R4	1.73	256.36	3204800	3235100	3132200	3122400	3296400	2967000	0.99	1	0.97	0.97	1.02	0.92	3204800	3235100	3132200	3122400	3296400	2967000	0.99	1	0.97	0.97	1.02	0.92	23	20	20	Carbamidomethylation; TMT10plex	117966	Ubiquitin-like modifier-activating enzyme 6 OS=Mus musculus OX=10090 GN=Uba6 PE=1 SV=1
1111	9566	Q8C570	6.79	256.28	1091600	1081400	1120800	1019700	941670	1027300	1.01	1	1.04	0.94	0.87	0.95	1091600	1081400	1120800	1019700	941670	1027300	1.01	1	1.04	0.94	0.87	0.95	43	12	12	Carbamidomethylation; TMT10plex	40965	mRNA export factor OS=Mus musculus OX=10090 GN=Rae1 PE=1 SV=1
967	2553	Q8C2Q3	10.37	256.24	1541700	1519000	1643200	1661000	1300700	1469800	1.01	1	1.08	1.09	0.86	0.97	1541700	1519000	1643200	1661000	1300700	1469800	1.01	1	1.08	1.09	0.86	0.97	22	13	13	Carbamidomethylation; TMT10plex	69449	RNA-binding protein 14 OS=Mus musculus OX=10090 GN=Rbm14 PE=1 SV=1
691	15906	P61205	0.73	256.19	4415900	4424600	4176200	4154500	4207200	4255400	1	1	0.94	0.94	0.95	0.96	4415900	4424600	4176200	4154500	4207200	4255400	1	1	0.94	0.94	0.95	0.96	15	11	2	TMT10plex	20601	ADP-ribosylation factor 3 OS=Mus musculus OX=10090 GN=Arf3 PE=2 SV=2
691	15934	P84078	0.73	256.19	4415900	4424600	4176200	4154500	4207200	4255400	1	1	0.94	0.94	0.95	0.96	4415900	4424600	4176200	4154500	4207200	4255400	1	1	0.94	0.94	0.95	0.96	15	11	2	TMT10plex	20697	ADP-ribosylation factor 1 OS=Mus musculus OX=10090 GN=Arf1 PE=1 SV=2
248	1199	Q61171	5.68	256.08	18769000	18701000	17658000	18060000	20577000	17861000	1	1	0.94	0.97	1.1	0.96	18769000	18701000	17658000	18060000	20577000	17861000	1	1	0.94	0.97	1.1	0.96	54	11	11	Carbamidomethylation; TMT10plex	21779	Peroxiredoxin-2 OS=Mus musculus OX=10090 GN=Prdx2 PE=1 SV=3
690	5402	P14094	22.1	255.96	15310000	13773000	14902000	11627000	11955000	10193000	1.11	1	1.08	0.84	0.87	0.74	15310000	13773000	14902000	11627000	11955000	10193000	1.11	1	1.08	0.84	0.87	0.74	36	13	13	Carbamidomethylation; TMT10plex	35195	Sodium/potassium-transporting ATPase subunit beta-1 OS=Mus musculus OX=10090 GN=Atp1b1 PE=1 SV=1
1449	15127	Q99L13	13.65	255.88	1038400	1158300	1179100	910660	1040000	890760	0.9	1	1.02	0.79	0.9	0.77	1038400	1158300	1179100	910660	1040000	890760	0.9	1	1.02	0.79	0.9	0.77	30	8	8	Carbamidomethylation; TMT10plex; Oxidation (M)	35440	3-hydroxyisobutyrate dehydrogenase mitochondrial OS=Mus musculus OX=10090 GN=Hibadh PE=1 SV=1
699	1812	P28474	5.5	255.63	3135000	3086700	3165700	3192200	2726600	3081200	1.02	1	1.03	1.03	0.88	1	3135000	3086700	3165700	3192200	2726600	3081200	1.02	1	1.03	1.03	0.88	1	40	13	13	Carbamidomethylation; TMT10plex	39548	Alcohol dehydrogenase class-3 OS=Mus musculus OX=10090 GN=Adh5 PE=1 SV=3
834	15720	P16675	5.52	255.62	6159100	6066000	5624100	5292100	5473300	5458400	1.02	1	0.93	0.87	0.9	0.9	6159100	6066000	5624100	5292100	5473300	5458400	1.02	1	0.93	0.87	0.9	0.9	31	12	12	Carbamidomethylation; TMT10plex	53844	Lysosomal protective protein OS=Mus musculus OX=10090 GN=Ctsa PE=1 SV=1
707	4108	Q3V1L4	3.35	255.4	7327100	7117200	7467300	7338500	7560300	6743700	1.03	1	1.05	1.03	1.06	0.95	7327100	7117200	7467300	7338500	7560300	6743700	1.03	1	1.05	1.03	1.06	0.95	32	17	17	Carbamidomethylation; TMT10plex	64809	Cytosolic purine 5'-nucleotidase OS=Mus musculus OX=10090 GN=Nt5c2 PE=1 SV=2
1174	3692	Q91XV3	8.08	255.24	343310	319820	329430	363710	389450	323200	1.07	1	1.03	1.14	1.22	1.01	343310	319820	329430	363710	389450	323200	1.07	1	1.03	1.14	1.22	1.01	55	10	10	TMT10plex	22087	Brain acid soluble protein 1 OS=Mus musculus OX=10090 GN=Basp1 PE=1 SV=3
517	1744	Q9R1T2	1.6	255.16	5032600	4782500	4741600	4791500	4890600	4744900	1.05	1	0.99	1	1.02	0.99	5032600	4782500	4741600	4791500	4890600	4744900	1.05	1	0.99	1	1.02	0.99	53	19	19	Carbamidomethylation; TMT10plex	38620	SUMO-activating enzyme subunit 1 OS=Mus musculus OX=10090 GN=Sae1 PE=1 SV=1
600	15694	Q80UJ7	3.72	255.16	2750800	2597800	2641300	2489100	2364300	2549400	1.06	1	1.02	0.96	0.91	0.98	2750800	2597800	2641300	2489100	2364300	2549400	1.06	1	1.02	0.96	0.91	0.98	27	21	21	Carbamidomethylation; TMT10plex	110198	Rab3 GTPase-activating protein catalytic subunit OS=Mus musculus OX=10090 GN=Rab3gap1 PE=1 SV=4
587	1639	Q58A65	13.86	255.03	1014600	1039000	1012800	973790	782750	886660	0.98	1	0.97	0.94	0.75	0.85	1014600	1039000	1012800	973790	782750	886660	0.98	1	0.97	0.94	0.75	0.85	19	21	18	Carbamidomethylation; TMT10plex	146219	C-Jun-amino-terminal kinase-interacting protein 4 OS=Mus musculus OX=10090 GN=Spag9 PE=1 SV=2
495	6835	Q8BG05	19.64	254.9	1858600	2606300	1951500	2235500	2778000	1932200	0.71	1	0.75	0.86	1.07	0.74	1858600	2606300	1951500	2235500	2778000	1932200	0.71	1	0.75	0.86	1.07	0.74	38	15	13	Carbamidomethylation; TMT10plex	39652	Heterogeneous nuclear ribonucleoprotein A3 OS=Mus musculus OX=10090 GN=Hnrnpa3 PE=1 SV=1
743	803	P62242	10.37	254.9	8452300	8365400	10060000	8835300	8352300	7963200	1.01	1	1.2	1.06	1	0.95	8452300	8365400	10060000	8835300	8352300	7963200	1.01	1	1.2	1.06	1	0.95	53	12	12	Carbamidomethylation; TMT10plex	24205	40S ribosomal protein S8 OS=Mus musculus OX=10090 GN=Rps8 PE=1 SV=2
471	1255	O54774	5.26	254.81	3107600	3024000	3110400	2648600	2943500	2987500	1.03	1	1.03	0.88	0.97	0.99	3107600	3024000	3110400	2648600	2943500	2987500	1.03	1	1.03	0.88	0.97	0.99	21	20	20	Carbamidomethylation; TMT10plex	135081	AP-3 complex subunit delta-1 OS=Mus musculus OX=10090 GN=Ap3d1 PE=1 SV=1
757	1155	P11103	5.34	254.78	2100200	2000700	2364200	2360000	2078800	2114400	1.05	1	1.18	1.18	1.04	1.06	2100200	2000700	2364200	2360000	2078800	2114400	1.05	1	1.18	1.18	1.04	1.06	22	18	18	Carbamidomethylation; TMT10plex	113100	Poly [ADP-ribose] polymerase 1 OS=Mus musculus OX=10090 GN=Parp1 PE=1 SV=3
664	6245	Q6A4J8	2.42	254.71	3246700	2978000	3139400	3136600	2903200	3180900	1.09	1	1.05	1.05	0.97	1.07	3246700	2978000	3139400	3136600	2903200	3180900	1.09	1	1.05	1.05	0.97	1.07	19	20	20	Carbamidomethylation; TMT10plex	128475	Ubiquitin carboxyl-terminal hydrolase 7 OS=Mus musculus OX=10090 GN=Usp7 PE=1 SV=1
886	89	Q99104	8.18	254.32	1156400	1023400	1018700	1049800	839000	1002600	1.13	1	1	1.03	0.82	0.98	1156400	1023400	1018700	1049800	839000	1002600	1.13	1	1	1.03	0.82	0.98	10	16	16	Carbamidomethylation; TMT10plex	215536	Unconventional myosin-Va OS=Mus musculus OX=10090 GN=Myo5a PE=1 SV=2
894	3579	Q6ZQ88	11.67	254.19	1031800	1099400	1128000	1035900	875850	1007800	0.94	1	1.03	0.94	0.8	0.92	1031800	1099400	1128000	1035900	875850	1007800	0.94	1	1.03	0.94	0.8	0.92	24	16	16	Carbamidomethylation; TMT10plex	92851	Lysine-specific histone demethylase 1A OS=Mus musculus OX=10090 GN=Kdm1a PE=1 SV=2
1779	8646	P53702	4.53	253.95	1087900	1153700	1150800	1009700	1029200	1019300	0.94	1	1	0.88	0.89	0.88	1087900	1153700	1150800	1009700	1029200	1019300	0.94	1	1	0.88	0.89	0.88	24	7	7	Carbamidomethylation; TMT10plex	30978	Cytochrome c-type heme lyase OS=Mus musculus OX=10090 GN=Hccs PE=1 SV=2
349	1118	P06151	12.76	253.89	7307200	6964300	8221800	7596700	9107400	7170400	1.05	1	1.18	1.09	1.31	1.03	7307200	6964300	8221800	7596700	9107400	7170400	1.05	1	1.18	1.09	1.31	1.03	38	17	16	Carbamidomethylation; TMT10plex; Oxidation (M)	36499	L-lactate dehydrogenase A chain OS=Mus musculus OX=10090 GN=Ldha PE=1 SV=3
801	2795	Q9ET22	13.05	253.79	1459500	1673700	1272000	1426100	1574900	1448400	0.87	1	0.76	0.85	0.94	0.87	1459500	1673700	1272000	1426100	1574900	1448400	0.87	1	0.76	0.85	0.94	0.87	26	11	11	Carbamidomethylation; TMT10plex	56254	Dipeptidyl peptidase 2 OS=Mus musculus OX=10090 GN=Dpp7 PE=1 SV=2
468	476	Q9D0F3	1.83	253.76	11494000	12227000	12191000	11503000	11509000	11504000	0.94	1	1	0.94	0.94	0.94	11494000	12227000	12191000	11503000	11509000	11504000	0.94	1	1	0.94	0.94	0.94	26	16	16	TMT10plex	57789	Protein ERGIC-53 OS=Mus musculus OX=10090 GN=Lman1 PE=1 SV=1
911	902	Q9DBC3	7.99	253.76	1778900	1644700	1896100	1680700	1559500	1561400	1.08	1	1.15	1.02	0.95	0.95	1778900	1644700	1896100	1680700	1559500	1561400	1.08	1	1.15	1.02	0.95	0.95	18	16	16	Carbamidomethylation; TMT10plex	95676	Cap-specific mRNA (nucleoside-2'-O-)-methyltransferase 1 OS=Mus musculus OX=10090 GN=Cmtr1 PE=1 SV=1
612	772	Q7TMK9	11.27	253.75	6577900	6728800	6756600	6624100	5277100	6534300	0.98	1	1	0.98	0.78	0.97	6577900	6728800	6756600	6624100	5277100	6534300	0.98	1	1	0.98	0.78	0.97	38	20	20	Carbamidomethylation; TMT10plex	69633	Heterogeneous nuclear ribonucleoprotein Q OS=Mus musculus OX=10090 GN=Syncrip PE=1 SV=2
860	5267	Q9EPW0	4.4	253.73	2059700	2077900	2196100	1995900	1935900	2032900	0.99	1	1.06	0.96	0.93	0.98	2059700	2077900	2196100	1995900	1935900	2032900	0.99	1	1.06	0.96	0.93	0.98	21	15	15	Carbamidomethylation; TMT10plex	105540	Inositol polyphosphate-4-phosphatase type I A OS=Mus musculus OX=10090 GN=Inpp4a PE=1 SV=1
1283	1922	Q8BJU0	5.43	253.67	2210800	2149700	2175500	2271500	2167200	2522400	1.03	1	1.01	1.06	1.01	1.17	2210800	2149700	2175500	2271500	2167200	2522400	1.03	1	1.01	1.06	1.01	1.17	39	11	11	Carbamidomethylation; TMT10plex	34322	Small glutamine-rich tetratricopeptide repeat-containing protein alpha OS=Mus musculus OX=10090 GN=Sgta PE=1 SV=2
1093	8673	Q4V9Z5	27.81	253.65	1156600	1108800	1502500	1032000	1395700	971370	1.04	1	1.36	0.93	1.26	0.88	1156600	1108800	1502500	1032000	1395700	971370	1.04	1	1.36	0.93	1.26	0.88	13	12	12	Carbamidomethylation; TMT10plex	97504	Seizure 6-like protein 2 OS=Mus musculus OX=10090 GN=Sez6l2 PE=1 SV=1
1014	10664	Q6P1B1	5.25	253.63	2082700	2299400	2062200	2256200	1990500	2174500	0.91	1	0.9	0.98	0.87	0.95	2082700	2299400	2062200	2256200	1990500	2174500	0.91	1	0.9	0.98	0.87	0.95	23	13	13	Carbamidomethylation; TMT10plex	69591	Xaa-Pro aminopeptidase 1 OS=Mus musculus OX=10090 GN=Xpnpep1 PE=1 SV=1
247	785	Q3U0V1	6.31	253.62	7951800	8127000	8442600	9089900	9499300	9876100	0.98	1	1.04	1.12	1.17	1.22	7951800	8127000	8442600	9089900	9499300	9876100	0.98	1	1.04	1.12	1.17	1.22	34	27	24	Carbamidomethylation; TMT10plex; Oxidation (M)	76776	Far upstream element-binding protein 2 OS=Mus musculus OX=10090 GN=Khsrp PE=1 SV=2
1206	9265	Q9DAW9	6.7	253.3	902960	928000	894820	790590	857670	753090	0.97	1	0.96	0.85	0.92	0.81	902960	928000	894820	790590	857670	753090	0.97	1	0.96	0.85	0.92	0.81	35	10	10	Carbamidomethylation; TMT10plex	36429	Calponin-3 OS=Mus musculus OX=10090 GN=Cnn3 PE=1 SV=1
971	4590	Q9WTQ5	27.98	253.29	427640	421480	402600	396670	623720	468240	1.01	1	0.96	0.94	1.48	1.11	427640	421480	402600	396670	623720	468240	1.01	1	0.96	0.94	1.48	1.11	12	15	15	TMT10plex	180694	A-kinase anchor protein 12 OS=Mus musculus OX=10090 GN=Akap12 PE=1 SV=1
470	2470	Q9JII6	9.55	253.23	4380700	4378300	4600400	4306000	3688100	4336900	1	1	1.05	0.98	0.84	0.99	4380700	4378300	4600400	4306000	3688100	4336900	1	1	1.05	0.98	0.84	0.99	51	17	16	Carbamidomethylation; TMT10plex	36587	Aldo-keto reductase family 1 member A1 OS=Mus musculus OX=10090 GN=Akr1a1 PE=1 SV=3
316	2396	P62897	18.61	253.15	34965000	36523000	37483000	43651000	51390000	43367000	0.96	1	1.03	1.2	1.41	1.19	34965000	36523000	37483000	43651000	51390000	43367000	0.96	1	1.03	1.2	1.41	1.19	66	12	12	TMT10plex; Oxidation (M)	11605	Cytochrome c somatic OS=Mus musculus OX=10090 GN=Cycs PE=1 SV=2
657	5373	P54728	3.5	252.99	6478500	6590800	6656500	6747400	7324200	7397700	0.98	1	1.01	1.02	1.11	1.12	6478500	6590800	6656500	6747400	7324200	7397700	0.98	1	1.01	1.02	1.11	1.12	30	14	12	TMT10plex	43513	UV excision repair protein RAD23 homolog B OS=Mus musculus OX=10090 GN=Rad23b PE=1 SV=2
724	10029	Q8C129	22.37	252.92	1107900	1167300	1126200	1064500	1086000	768200	0.95	1	0.96	0.91	0.93	0.66	1107900	1167300	1126200	1064500	1086000	768200	0.95	1	0.96	0.91	0.93	0.66	15	15	15	Carbamidomethylation; TMT10plex	117304	Leucyl-cystinyl aminopeptidase OS=Mus musculus OX=10090 GN=Lnpep PE=1 SV=1
871	5479	Q9WVJ3	9.32	252.9	3370400	3336700	3924300	3395800	3157400	3310900	1.01	1	1.18	1.02	0.95	0.99	3370400	3336700	3924300	3395800	3157400	3310900	1.01	1	1.18	1.02	0.95	0.99	32	12	12	Carbamidomethylation; TMT10plex	51813	Carboxypeptidase Q OS=Mus musculus OX=10090 GN=Cpq PE=1 SV=1
983	2756	O35465	10.95	252.83	3563300	3651500	2991900	3415700	2865200	3128000	0.98	1	0.82	0.94	0.78	0.86	3563300	3651500	2991900	3415700	2865200	3128000	0.98	1	0.82	0.94	0.78	0.86	32	11	11	Carbamidomethylation; TMT10plex	43529	Peptidyl-prolyl cis-trans isomerase FKBP8 OS=Mus musculus OX=10090 GN=Fkbp8 PE=1 SV=2
897	3587	Q9CYA0	28.64	252.75	5041900	3957300	4558500	5554400	5283900	7105200	1.27	1	1.15	1.4	1.34	1.8	5041900	3957300	4558500	5554400	5283900	7105200	1.27	1	1.15	1.4	1.34	1.8	42	14	14	Carbamidomethylation; TMT10plex	38220	Protein disulfide isomerase Creld2 OS=Mus musculus OX=10090 GN=Creld2 PE=1 SV=1
407	127	P51150	8.27	252.71	7599500	7662800	7230900	6160000	6683900	6834700	0.99	1	0.94	0.8	0.87	0.89	7599500	7662800	7230900	6160000	6683900	6834700	0.99	1	0.94	0.8	0.87	0.89	77	15	15	Carbamidomethylation; TMT10plex; Oxidation (M)	23490	Ras-related protein Rab-7a OS=Mus musculus OX=10090 GN=Rab7a PE=1 SV=2
629	1213	Q8BYA0	7.23	252.66	1295400	1255000	1350800	1253800	1125900	1352300	1.03	1	1.08	1	0.9	1.08	1295400	1255000	1350800	1253800	1125900	1352300	1.03	1	1.08	1	0.9	1.08	16	16	16	Carbamidomethylation; TMT10plex	133321	Tubulin-specific chaperone D OS=Mus musculus OX=10090 GN=Tbcd PE=1 SV=1
319	2091	Q76MZ3	3.83	252.62	7696100	7612300	7738600	7235800	8526100	7354600	1.01	1	1.02	0.95	1.12	0.97	7696100	7612300	7738600	7235800	8526100	7354600	1.01	1	1.02	0.95	1.12	0.97	30	22	18	Carbamidomethylation; TMT10plex; Oxidation (M)	65323	Serine/threonine-protein phosphatase 2A 65 kDa regulatory subunit A alpha isoform OS=Mus musculus OX=10090 GN=Ppp2r1a PE=1 SV=3
712	6246	Q9R190	14.76	252.57	1596100	1462700	1574600	1582300	1172400	1444600	1.09	1	1.08	1.08	0.8	0.99	1596100	1462700	1574600	1582300	1172400	1444600	1.09	1	1.08	1.08	0.8	0.99	24	15	13	TMT10plex	75030	Metastasis-associated protein MTA2 OS=Mus musculus OX=10090 GN=Mta2 PE=1 SV=1
1512	15787	Q8R3H7	7.42	252.55	1206400	1239100	1029300	1147400	1169800	1027500	0.97	1	0.83	0.93	0.94	0.83	1206400	1239100	1029300	1147400	1169800	1027500	0.97	1	0.83	0.93	0.94	0.83	27	8	8	Carbamidomethylation; TMT10plex	41813	Heparan sulfate 2-O-sulfotransferase 1 OS=Mus musculus OX=10090 GN=Hs2st1 PE=1 SV=2
701	3250	Q9R1P0	8	252.42	4597700	4159600	5001100	5058400	4489900	4203000	1.11	1	1.2	1.22	1.08	1.01	4597700	4159600	5001100	5058400	4489900	4203000	1.11	1	1.2	1.22	1.08	1.01	45	12	12	Carbamidomethylation; TMT10plex; Oxidation (M)	29471	Proteasome subunit alpha type-4 OS=Mus musculus OX=10090 GN=Psma4 PE=1 SV=1
752	2355	P59279	12.26	252.38	1032	466.913	0	0	2197.9	2601.9	2.21	1	0	0	4.71	5.57	1032	466.913	0	0	2197.9	2601.9	2.21	1	0	0	4.71	5.57	6	9	1	Carbamidomethylation; TMT10plex	24198	Ras-related protein Rab-2B OS=Mus musculus OX=10090 GN=Rab2b PE=1 SV=1
795	4191	P28740	3.44	252.31	894440	930050	867020	973140	848740	792410	0.96	1	0.93	1.05	0.91	0.85	894440	930050	867020	973140	848740	792410	0.96	1	0.93	1.05	0.91	0.85	26	16	16	Carbamidomethylation; TMT10plex	79756	Kinesin-like protein KIF2A OS=Mus musculus OX=10090 GN=Kif2a PE=1 SV=2
487	1649	Q9JLN9	3.87	252.24	1032700	1039000	1036600	1014800	960950	924650	0.99	1	1	0.98	0.92	0.89	1032700	1039000	1036600	1014800	960950	924650	0.99	1	1	0.98	0.92	0.89	13	24	24	Carbamidomethylation; TMT10plex	288788	Serine/threonine-protein kinase mTOR OS=Mus musculus OX=10090 GN=Mtor PE=1 SV=2
631	274	P48193	3.61	252.18	1527100	1675200	1535600	1658300	1503300	1583000	0.91	1	0.92	0.99	0.9	0.94	1527100	1675200	1535600	1658300	1503300	1583000	0.91	1	0.92	0.99	0.9	0.94	24	19	17	Carbamidomethylation; TMT10plex	95911	Protein 4.1 OS=Mus musculus OX=10090 GN=Epb41 PE=1 SV=2
892	1989	Q6Q477	7.53	252.17	150240	177690	179250	193640	183600	130410	0.85	1	1.01	1.09	1.03	0.73	150240	177690	179250	193640	183600	130410	0.85	1	1.01	1.09	1.03	0.73	5	12	4	Carbamidomethylation; TMT10plex	133068	Plasma membrane calcium-transporting ATPase 4 OS=Mus musculus OX=10090 GN=Atp2b4 PE=1 SV=1
466	3036	Q91WD5	20.5	252.15	11884000	11197000	11876000	11104000	9316800	8264100	1.06	1	1.06	0.99	0.83	0.74	11884000	11197000	11876000	11104000	9316800	8264100	1.06	1	1.06	0.99	0.83	0.74	55	20	20	Carbamidomethylation; TMT10plex; Oxidation (M)	52626	NADH dehydrogenase [ubiquinone] iron-sulfur protein 2 mitochondrial OS=Mus musculus OX=10090 GN=Ndufs2 PE=1 SV=1
858	2937	Q9D024	9.19	252.06	2340100	2612300	2181900	2311900	2706200	2311800	0.9	1	0.84	0.89	1.04	0.88	2340100	2612300	2181900	2311900	2706200	2311800	0.9	1	0.84	0.89	1.04	0.88	30	15	15	Carbamidomethylation; TMT10plex	55844	Coiled-coil domain-containing protein 47 OS=Mus musculus OX=10090 GN=Ccdc47 PE=1 SV=2
1359	2080	P10711	12.33	252.02	1080700	1085200	1286700	1427300	1222600	1257900	1	1	1.19	1.32	1.13	1.16	1080700	1085200	1286700	1427300	1222600	1257900	1	1	1.19	1.32	1.13	1.16	32	11	9	Carbamidomethylation; TMT10plex	33880	Transcription elongation factor A protein 1 OS=Mus musculus OX=10090 GN=Tcea1 PE=1 SV=2
874	8100	Q11136	11.47	252	3178600	2936300	3158400	3915100	3053800	3621700	1.08	1	1.08	1.33	1.04	1.23	3178600	2936300	3158400	3915100	3053800	3621700	1.08	1	1.08	1.33	1.04	1.23	35	15	15	Carbamidomethylation; TMT10plex	55029	Xaa-Pro dipeptidase OS=Mus musculus OX=10090 GN=Pepd PE=1 SV=3
333	345	Q9Z1G3	3.95	251.99	4512100	5071100	4934300	4465200	5118100	4570000	0.89	1	0.97	0.88	1.01	0.9	4512100	5071100	4934300	4465200	5118100	4570000	0.89	1	0.97	0.88	1.01	0.9	48	19	19	Carbamidomethylation; TMT10plex	43888	V-type proton ATPase subunit C 1 OS=Mus musculus OX=10090 GN=Atp6v1c1 PE=1 SV=4
1300	4333	Q9CT10	25.81	251.85	970080	828060	932600	930150	948590	1415300	1.17	1	1.13	1.12	1.15	1.71	970080	828060	932600	930150	948590	1415300	1.17	1	1.13	1.12	1.15	1.71	24	11	11	Carbamidomethylation; TMT10plex	52573	Ran-binding protein 3 OS=Mus musculus OX=10090 GN=Ranbp3 PE=1 SV=2
856	13547	P62137	10.72	251.84	1865200	1722800	1785000	1530400	1696000	2721000	1.08	1	1.04	0.89	0.98	1.58	1865200	1722800	1785000	1530400	1696000	2721000	1.08	1	1.04	0.89	0.98	1.58	9	13	3	TMT10plex	37540	Serine/threonine-protein phosphatase PP1-alpha catalytic subunit OS=Mus musculus OX=10090 GN=Ppp1ca PE=1 SV=1
1287	2868	Q62433	7.79	251.74	1118900	1115300	1210100	993210	1054500	1005300	1	1	1.08	0.89	0.95	0.9	1118900	1115300	1210100	993210	1054500	1005300	1	1	1.08	0.89	0.95	0.9	32	8	8	Carbamidomethylation; TMT10plex	43009	Protein NDRG1 OS=Mus musculus OX=10090 GN=Ndrg1 PE=1 SV=1
646	12922	Q8R0Y6	4.39	251.59	723100	688460	688960	614720	618910	664550	1.05	1	1	0.89	0.9	0.97	723100	688460	688960	614720	618910	664550	1.05	1	1	0.89	0.9	0.97	29	21	20	Carbamidomethylation; TMT10plex	98709	Cytosolic 10-formyltetrahydrofolate dehydrogenase OS=Mus musculus OX=10090 GN=Aldh1l1 PE=1 SV=1
507	2763	Q60598	8.35	251.42	3684900	3359400	3703000	4180200	4109600	4393700	1.1	1	1.1	1.24	1.22	1.31	3684900	3359400	3703000	4180200	4109600	4393700	1.1	1	1.1	1.24	1.22	1.31	30	19	19	Carbamidomethylation; TMT10plex	61250	Src substrate cortactin OS=Mus musculus OX=10090 GN=Cttn PE=1 SV=2
596	12153	Q9JIK5	9.87	251.41	1420400	1646100	1605800	1755300	1312900	1321200	0.86	1	0.98	1.07	0.8	0.8	1420400	1646100	1605800	1755300	1312900	1321200	0.86	1	0.98	1.07	0.8	0.8	30	20	20	Carbamidomethylation; TMT10plex	93551	Nucleolar RNA helicase 2 OS=Mus musculus OX=10090 GN=Ddx21 PE=1 SV=3
357	671	P18760	21.47	251.23	35497000	36377000	35313000	37554000	51283000	48578000	0.98	1	0.97	1.03	1.41	1.34	35497000	36377000	35313000	37554000	51283000	48578000	0.98	1	0.97	1.03	1.41	1.34	61	13	11	Carbamidomethylation; TMT10plex	18560	Cofilin-1 OS=Mus musculus OX=10090 GN=Cfl1 PE=1 SV=3
265	9147	P54227	11.72	251.17	32606000	32531000	34144000	38140000	38624000	42020000	1	1	1.05	1.17	1.19	1.29	32606000	32531000	34144000	38140000	38624000	42020000	1	1	1.05	1.17	1.19	1.29	59	13	13	TMT10plex	17274	Stathmin OS=Mus musculus OX=10090 GN=Stmn1 PE=1 SV=2
358	201	Q9WV27	3.84	251.03	883110	373660	847310	686240	712430	1160200	2.36	1	2.27	1.84	1.91	3.11	883110	373660	847310	686240	712430	1160200	2.36	1	2.27	1.84	1.91	3.11	1	11	1	TMT10plex	114887	Sodium/potassium-transporting ATPase subunit alpha-4 OS=Mus musculus OX=10090 GN=Atp1a4 PE=1 SV=3
1295	5403	P47758	6.44	250.87	1187900	1292300	1338400	1419200	1356000	1435900	0.92	1	1.04	1.1	1.05	1.11	1187900	1292300	1338400	1419200	1356000	1435900	0.92	1	1.04	1.1	1.05	1.11	40	11	11	Carbamidomethylation; TMT10plex	29579	Signal recognition particle receptor subunit beta OS=Mus musculus OX=10090 GN=Srprb PE=1 SV=1
363	3129	P14148	6.74	250.73	18718000	22256000	20766000	21209000	22018000	20473000	0.84	1	0.93	0.95	0.99	0.92	18718000	22256000	20766000	21209000	22018000	20473000	0.84	1	0.93	0.95	0.99	0.92	54	20	20	Carbamidomethylation; TMT10plex	31420	60S ribosomal protein L7 OS=Mus musculus OX=10090 GN=Rpl7 PE=1 SV=2
574	7531	P24369	5.1	250.69	14252000	14444000	14939000	12972000	14519000	13043000	0.99	1	1.03	0.9	1.01	0.9	14252000	14444000	14939000	12972000	14519000	13043000	0.99	1	1.03	0.9	1.01	0.9	56	14	14	TMT10plex	23713	Peptidyl-prolyl cis-trans isomerase B OS=Mus musculus OX=10090 GN=Ppib PE=1 SV=2
888	1604	Q9CZU3	8.09	250.49	1378300	1338100	1450100	1344700	1502400	1190700	1.03	1	1.08	1	1.12	0.89	1378300	1338100	1450100	1344700	1502400	1190700	1.03	1	1.08	1	1.12	0.89	16	15	15	Carbamidomethylation; TMT10plex	117636	Exosome RNA helicase MTR4 OS=Mus musculus OX=10090 GN=Mtrex PE=1 SV=1
1222	9807	Q8R0G9	4.19	250.46	936720	966930	878920	838040	867420	976760	0.97	1	0.91	0.87	0.9	1.01	936720	966930	878920	838040	867420	976760	0.97	1	0.91	0.87	0.9	1.01	14	12	12	Carbamidomethylation; TMT10plex	128620	Nuclear pore complex protein Nup133 OS=Mus musculus OX=10090 GN=Nup133 PE=1 SV=2
774	5280	Q05CL8	8.96	250.39	2545800	2402500	2519300	2205200	2038700	2130300	1.06	1	1.05	0.92	0.85	0.89	2545800	2402500	2519300	2205200	2038700	2130300	1.06	1	1.05	0.92	0.85	0.89	32	17	17	Carbamidomethylation; TMT10plex	64802	La-related protein 7 OS=Mus musculus OX=10090 GN=Larp7 PE=1 SV=2
895	7734	Q9D8U8	2.74	250.37	2324900	2224800	2204700	2372500	2182300	2021700	1.05	1	0.99	1.07	0.98	0.91	2324900	2224800	2204700	2372500	2182300	2021700	1.05	1	0.99	1.07	0.98	0.91	35	14	14	Carbamidomethylation; TMT10plex	46797	Sorting nexin-5 OS=Mus musculus OX=10090 GN=Snx5 PE=1 SV=1
827	11798	Q7TQK5	13.62	250.33	1286400	1365900	1240000	1111900	1032300	1056000	0.94	1	0.91	0.81	0.76	0.77	1286400	1365900	1240000	1111900	1032300	1056000	0.94	1	0.91	0.81	0.76	0.77	29	16	16	Carbamidomethylation; TMT10plex	72603	Coiled-coil domain-containing protein 93 OS=Mus musculus OX=10090 GN=Ccdc93 PE=1 SV=1
875	10427	Q8VH51	7.64	250.31	2658900	2563100	2808200	2867200	2475400	2323900	1.04	1	1.1	1.12	0.97	0.91	2658900	2563100	2808200	2867200	2475400	2323900	1.04	1	1.1	1.12	0.97	0.91	27	13	13	Carbamidomethylation; TMT10plex	59407	RNA-binding protein 39 OS=Mus musculus OX=10090 GN=Rbm39 PE=1 SV=2
919	5245	Q99KK2	13.25	250.23	2068000	2101400	2482500	2722700	2441000	2523200	0.98	1	1.18	1.3	1.16	1.2	2068000	2101400	2482500	2722700	2441000	2523200	0.98	1	1.18	1.3	1.16	1.2	36	14	14	Carbamidomethylation; TMT10plex	48058	N-acylneuraminate cytidylyltransferase OS=Mus musculus OX=10090 GN=Cmas PE=1 SV=2
305	637	Q569Z5	3.97	250.19	2914900	2842200	3024300	3045800	2784000	3398100	1.03	1	1.06	1.07	0.98	1.2	2914900	2842200	3024300	3045800	2784000	3398100	1.03	1	1.06	1.07	0.98	1.2	26	25	25	Carbamidomethylation; TMT10plex	117448	Probable ATP-dependent RNA helicase DDX46 OS=Mus musculus OX=10090 GN=Ddx46 PE=1 SV=2
401	1941	P26041	13.23	250.17	1638500	1692300	1691100	1488400	1285800	1369200	0.97	1	1	0.88	0.76	0.81	1638500	1692300	1691100	1488400	1285800	1369200	0.97	1	1	0.88	0.76	0.81	26	27	18	TMT10plex	67767	Moesin OS=Mus musculus OX=10090 GN=Msn PE=1 SV=3
625	13972	Q99PT1	3.13	250.16	4343700	4223200	4059000	4470200	4141900	4337700	1.03	1	0.96	1.06	0.98	1.03	4343700	4223200	4059000	4470200	4141900	4337700	1.03	1	0.96	1.06	0.98	1.03	63	12	12	Carbamidomethylation; TMT10plex; Oxidation (M)	23407	Rho GDP-dissociation inhibitor 1 OS=Mus musculus OX=10090 GN=Arhgdia PE=1 SV=3
653	3695	Q99KE1	3.37	250.14	3748400	3807100	3422000	3422800	3436600	3347700	0.98	1	0.9	0.9	0.9	0.88	3748400	3807100	3422000	3422800	3436600	3347700	0.98	1	0.9	0.9	0.9	0.88	38	19	19	Carbamidomethylation; TMT10plex	65799	NAD-dependent malic enzyme mitochondrial OS=Mus musculus OX=10090 GN=Me2 PE=1 SV=1
553	1045	Q8BY87	2.32	250.1	1732900	1706400	1641200	1775100	1582000	1623500	1.02	1	0.96	1.04	0.93	0.95	1732900	1706400	1641200	1775100	1582000	1623500	1.02	1	0.96	1.04	0.93	0.95	18	21	21	Carbamidomethylation; TMT10plex	157455	Ubiquitin carboxyl-terminal hydrolase 47 OS=Mus musculus OX=10090 GN=Usp47 PE=1 SV=2
382	748	Q99LX0	4.4	249.99	16948000	19227000	17587000	17801000	18219000	19235000	0.88	1	0.91	0.93	0.95	1	16948000	19227000	17587000	17801000	18219000	19235000	0.88	1	0.91	0.93	0.95	1	73	14	14	Carbamidomethylation; TMT10plex; Oxidation (M)	20021	Protein/nucleic acid deglycase DJ-1 OS=Mus musculus OX=10090 GN=Park7 PE=1 SV=1
981	1856	Q9D2V7	2.95	249.95	1546200	1442100	1597300	1521300	1456800	1529700	1.07	1	1.11	1.05	1.01	1.06	1546200	1442100	1597300	1521300	1456800	1529700	1.07	1	1.11	1.05	1.01	1.06	21	14	14	Carbamidomethylation; TMT10plex	100812	Coronin-7 OS=Mus musculus OX=10090 GN=Coro7 PE=1 SV=2
1100	4424	P97384	7.58	249.94	875500	1016800	834690	902010	931270	915940	0.86	1	0.82	0.89	0.92	0.9	875500	1016800	834690	902010	931270	915940	0.86	1	0.82	0.89	0.92	0.9	29	13	13	Carbamidomethylation; TMT10plex	54079	Annexin A11 OS=Mus musculus OX=10090 GN=Anxa11 PE=1 SV=2
841	4015	Q9DBG7	2.55	249.81	2281300	2071500	2147000	2269100	2108700	2196500	1.1	1	1.04	1.1	1.02	1.06	2281300	2071500	2147000	2269100	2108700	2196500	1.1	1	1.04	1.1	1.02	1.06	24	15	15	Carbamidomethylation; TMT10plex	69623	Signal recognition particle receptor subunit alpha OS=Mus musculus OX=10090 GN=Srpra PE=1 SV=1
1031	15715	P97855	5.48	249.8	2799900	3087700	3249300	2946500	3524900	3055200	0.91	1	1.05	0.95	1.14	0.99	2799900	3087700	3249300	2946500	3524900	3055200	0.91	1	1.05	0.95	1.14	0.99	34	13	12	Carbamidomethylation; TMT10plex	51829	Ras GTPase-activating protein-binding protein 1 OS=Mus musculus OX=10090 GN=G3bp1 PE=1 SV=1
773	11344	Q9Z2I0	7.59	249.79	3410900	3090300	3357500	2993900	2782200	2780500	1.1	1	1.09	0.97	0.9	0.9	3410900	3090300	3357500	2993900	2782200	2780500	1.1	1	1.09	0.97	0.9	0.9	28	16	16	TMT10plex	82989	Mitochondrial proton/calcium exchanger protein OS=Mus musculus OX=10090 GN=Letm1 PE=1 SV=1
798	1460	Q922Q1	3.58	249.78	4279700	4204600	4385500	4576800	4658000	3938300	1.02	1	1.04	1.09	1.11	0.94	4279700	4204600	4385500	4576800	4658000	3938300	1.02	1	1.04	1.09	1.11	0.94	37	14	14	Carbamidomethylation; TMT10plex	38194	Mitochondrial amidoxime reducing component 2 OS=Mus musculus OX=10090 GN=Mtarc2 PE=1 SV=1
426	6100	P54775	4.82	249.68	2616100	2412600	2475800	2579500	2162800	2342100	1.08	1	1.03	1.07	0.9	0.97	2616100	2412600	2475800	2579500	2162800	2342100	1.08	1	1.03	1.07	0.9	0.97	45	19	18	Carbamidomethylation; TMT10plex; Oxidation (M); Acetylation (Protein N-term)	47408	26S proteasome regulatory subunit 6B OS=Mus musculus OX=10090 GN=Psmc4 PE=1 SV=2
1135	15612	O08532	19.98	249.64	916640	930530	1051700	832410	736010	784800	0.99	1	1.13	0.89	0.79	0.84	916640	930530	1051700	832410	736010	784800	0.99	1	1.13	0.89	0.79	0.84	15	13	13	Carbamidomethylation; TMT10plex	124630	Voltage-dependent calcium channel subunit alpha-2/delta-1 OS=Mus musculus OX=10090 GN=Cacna2d1 PE=1 SV=1
1147	780	Q9EPL8	4.33	249.58	1975700	1866600	2025600	1941500	2114300	2086000	1.06	1	1.09	1.04	1.13	1.12	1975700	1866600	2025600	1941500	2114300	2086000	1.06	1	1.09	1.04	1.13	1.12	14	13	12	Carbamidomethylation; TMT10plex	119486	Importin-7 OS=Mus musculus OX=10090 GN=Ipo7 PE=1 SV=2
560	1295	O88448	4.47	249.55	2088600	2178900	2034200	2235500	1917500	2053300	0.96	1	0.93	1.03	0.88	0.94	2088600	2178900	2034200	2235500	1917500	2053300	0.96	1	0.93	1.03	0.88	0.94	22	19	12	TMT10plex	66662	Kinesin light chain 2 OS=Mus musculus OX=10090 GN=Klc2 PE=1 SV=1
1377	1136	Q0VGU4	20.01	249.43	814690	923050	779220	769370	1113800	968610	0.88	1	0.84	0.83	1.21	1.05	814690	923050	779220	769370	1113800	968610	0.88	1	0.84	0.83	1.21	1.05	18	9	9	TMT10plex	68232	Neurosecretory protein VGF OS=Mus musculus OX=10090 GN=Vgf PE=1 SV=1
624	1952	Q62393	4.81	249.29	6019800	5784200	6256400	6620000	5868300	6911700	1.04	1	1.08	1.14	1.01	1.19	6019800	5784200	6256400	6620000	5868300	6911700	1.04	1	1.08	1.14	1.01	1.19	39	11	11	TMT10plex	24313	Tumor protein D52 OS=Mus musculus OX=10090 GN=Tpd52 PE=1 SV=2
958	1728	Q9CZ30	2.18	249.26	5091700	5479900	5256800	5429700	5423500	5323300	0.93	1	0.96	0.99	0.99	0.97	5091700	5479900	5256800	5429700	5423500	5323300	0.93	1	0.96	0.99	0.99	0.97	31	13	13	Carbamidomethylation; TMT10plex	44730	Obg-like ATPase 1 OS=Mus musculus OX=10090 GN=Ola1 PE=1 SV=1
853	12310	Q8C878	3.49	249.15	2347100	2239400	2395400	2291000	2162100	2155800	1.05	1	1.07	1.02	0.97	0.96	2347100	2239400	2395400	2291000	2162100	2155800	1.05	1	1.07	1.02	0.97	0.96	36	14	14	Carbamidomethylation; TMT10plex	51737	NEDD8-activating enzyme E1 catalytic subunit OS=Mus musculus OX=10090 GN=Uba3 PE=1 SV=2
572	7931	Q91VR2	33.5	249.15	10967000	10031000	11588000	7996700	7122600	7596500	1.09	1	1.16	0.8	0.71	0.76	10967000	10031000	11588000	7996700	7122600	7596500	1.09	1	1.16	0.8	0.71	0.76	39	12	12	Carbamidomethylation; TMT10plex; Oxidation (M)	32886	ATP synthase subunit gamma mitochondrial OS=Mus musculus OX=10090 GN=Atp5f1c PE=1 SV=1
1074	2866	Q8BH95	11.84	249.09	2855700	3458300	2715200	2725400	3019200	2184800	0.83	1	0.79	0.79	0.87	0.63	2855700	3458300	2715200	2725400	3019200	2184800	0.83	1	0.79	0.79	0.87	0.63	41	11	11	Carbamidomethylation; TMT10plex	31474	Enoyl-CoA hydratase mitochondrial OS=Mus musculus OX=10090 GN=Echs1 PE=1 SV=1
1855	8551	Q8R2Y8	27.35	249.03	820670	893560	766240	864270	580210	691290	0.92	1	0.86	0.97	0.65	0.77	820670	893560	766240	864270	580210	691290	0.92	1	0.86	0.97	0.65	0.77	46	7	7	Carbamidomethylation; TMT10plex	19527	Peptidyl-tRNA hydrolase 2 mitochondrial OS=Mus musculus OX=10090 GN=Ptrh2 PE=1 SV=1
1117	1645	Q9JMD3	7.7	249	459150	423780	466920	372410	433590	419820	1.08	1	1.1	0.88	1.02	0.99	459150	423780	466920	372410	433590	419820	1.08	1	1.1	0.88	1.02	0.99	39	9	9	Carbamidomethylation; TMT10plex	32951	START domain-containing protein 10 OS=Mus musculus OX=10090 GN=Stard10 PE=1 SV=1
1272	2935	Q8R081	8.9	248.88	5022300	5636100	4991400	5903100	4744200	4066900	0.89	1	0.89	1.05	0.84	0.72	5022300	5636100	4991400	5903100	4744200	4066900	0.89	1	0.89	1.05	0.84	0.72	23	10	10	Carbamidomethylation; TMT10plex	63964	Heterogeneous nuclear ribonucleoprotein L OS=Mus musculus OX=10090 GN=Hnrnpl PE=1 SV=2
1030	7050	Q99JB2	31.92	248.75	732820	798400	785940	715010	497410	650850	0.92	1	0.98	0.9	0.62	0.82	732820	798400	785940	715010	497410	650850	0.92	1	0.98	0.9	0.62	0.82	29	10	10	TMT10plex	38385	Stomatin-like protein 2 mitochondrial OS=Mus musculus OX=10090 GN=Stoml2 PE=1 SV=1
652	374	Q7TNC4	6.16	248.74	1758800	1895700	1818200	1915200	2075700	2138600	0.93	1	0.96	1.01	1.09	1.13	1758800	1895700	1818200	1915200	2075700	2138600	0.93	1	0.96	1.01	1.09	1.13	16	11	7	TMT10plex	46583	Putative RNA-binding protein Luc7-like 2 OS=Mus musculus OX=10090 GN=Luc7l2 PE=1 SV=1
1237	7367	Q5EG47	3.65	248.54	2045800	1954500	1995600	2000000	1789100	1855700	1.05	1	1.02	1.02	0.92	0.95	2045800	1954500	1995600	2000000	1789100	1855700	1.05	1	1.02	1.02	0.92	0.95	27	12	12	Carbamidomethylation; TMT10plex	63929	5'-AMP-activated protein kinase catalytic subunit alpha-1 OS=Mus musculus OX=10090 GN=Prkaa1 PE=1 SV=2
993	2075	Q8VHE0	4.58	248.53	3298800	3331100	3096400	3047700	2924400	2922500	0.99	1	0.93	0.91	0.88	0.88	3298800	3331100	3096400	3047700	2924400	2922500	0.99	1	0.93	0.91	0.88	0.88	22	14	14	Carbamidomethylation; TMT10plex	87870	Translocation protein SEC63 homolog OS=Mus musculus OX=10090 GN=Sec63 PE=1 SV=4
937	13686	P63087	9.76	248.44	13770	43824	31293	6284.1	19025	17864	0.31	1	0.71	0.14	0.43	0.41	13770	43824	31293	6284.1	19025	17864	0.31	1	0.71	0.14	0.43	0.41	3	12	1	TMT10plex	36984	Serine/threonine-protein phosphatase PP1-gamma catalytic subunit OS=Mus musculus OX=10090 GN=Ppp1cc PE=1 SV=1
735	2219	Q9QXK3	3.32	248.41	1293000	1205500	1183300	1151100	1200100	1227200	1.07	1	0.98	0.95	1	1.02	1293000	1205500	1183300	1151100	1200100	1227200	1.07	1	0.98	0.95	1	1.02	15	16	11	Carbamidomethylation; TMT10plex	97680	Coatomer subunit gamma-2 OS=Mus musculus OX=10090 GN=Copg2 PE=1 SV=1
1168	5345	P36916	6.81	248.22	636990	545200	588600	615220	649110	634540	1.17	1	1.08	1.13	1.19	1.16	636990	545200	588600	615220	649110	634540	1.17	1	1.08	1.13	1.19	1.16	24	12	12	Carbamidomethylation; TMT10plex	68771	Guanine nucleotide-binding protein-like 1 OS=Mus musculus OX=10090 GN=Gnl1 PE=1 SV=4
311	15778	Q01768	12.06	248.22	26741000	34631000	27001000	26744000	27206000	28193000	0.77	1	0.78	0.77	0.79	0.81	26741000	34631000	27001000	26744000	27206000	28193000	0.77	1	0.78	0.77	0.79	0.81	47	12	7	TMT10plex; Oxidation (M)	17363	Nucleoside diphosphate kinase B OS=Mus musculus OX=10090 GN=Nme2 PE=1 SV=1
1058	12187	P41216	2.88	248.19	1897000	1868900	1785400	1763800	1954000	1665400	1.02	1	0.96	0.94	1.05	0.89	1897000	1868900	1785400	1763800	1954000	1665400	1.02	1	0.96	0.94	1.05	0.89	24	15	13	Carbamidomethylation; TMT10plex	77952	Long-chain-fatty-acid--CoA ligase 1 OS=Mus musculus OX=10090 GN=Acsl1 PE=1 SV=2
771	4766	Q9QYI3	6.82	248.15	1311300	1311500	1407900	1301800	1182300	1247400	1	1	1.07	0.99	0.9	0.95	1311300	1311500	1407900	1301800	1182300	1247400	1	1	1.07	0.99	0.9	0.95	41	17	17	Carbamidomethylation; TMT10plex	56476	DnaJ homolog subfamily C member 7 OS=Mus musculus OX=10090 GN=Dnajc7 PE=1 SV=2
992	1900	Q9DAW6	3.38	248.05	1602100	1722900	1534600	1659100	1693000	1476500	0.93	1	0.89	0.96	0.98	0.86	1602100	1722900	1534600	1659100	1693000	1476500	0.93	1	0.89	0.96	0.98	0.86	36	15	15	Carbamidomethylation; TMT10plex	58370	U4/U6 small nuclear ribonucleoprotein Prp4 OS=Mus musculus OX=10090 GN=Prpf4 PE=1 SV=1
732	15916	Q9CXI5	25.02	247.85	6729600	6160300	7390000	9277000	7917400	9553200	1.09	1	1.2	1.51	1.29	1.55	6729600	6160300	7390000	9277000	7917400	9553200	1.09	1	1.2	1.51	1.29	1.55	32	8	8	Carbamidomethylation; TMT10plex; Oxidation (M)	20374	Mesencephalic astrocyte-derived neurotrophic factor OS=Mus musculus OX=10090 GN=Manf PE=1 SV=1
836	4164	Q8BIJ6	4.02	247.82	2139500	2333000	2055400	2025100	2086100	2037400	0.92	1	0.88	0.87	0.89	0.87	2139500	2333000	2055400	2025100	2086100	2037400	0.92	1	0.88	0.87	0.89	0.87	20	16	16	Carbamidomethylation; TMT10plex	112804	Isoleucine--tRNA ligase mitochondrial OS=Mus musculus OX=10090 GN=Iars2 PE=1 SV=1
1784	6972	Q8R570	5.44	247.82	471900	488900	529480	459830	456610	568240	0.97	1	1.08	0.94	0.93	1.16	471900	488900	529480	459830	456610	568240	0.97	1	1.08	0.94	0.93	1.16	30	9	9	Carbamidomethylation; TMT10plex	46524	Synaptosomal-associated protein 47 OS=Mus musculus OX=10090 GN=Snap47 PE=1 SV=1
998	680	Q6P8X1	2.65	247.79	2622000	2642600	2478900	2643800	2438800	2311100	0.99	1	0.94	1	0.92	0.87	2622000	2642600	2478900	2643800	2438800	2311100	0.99	1	0.94	1	0.92	0.87	37	13	13	Carbamidomethylation; TMT10plex	46649	Sorting nexin-6 OS=Mus musculus OX=10090 GN=Snx6 PE=1 SV=2
921	791	Q62419	2.62	247.73	722250	710860	776030	728290	713780	823470	1.02	1	1.09	1.02	1	1.16	722250	710860	776030	728290	713780	823470	1.02	1	1.09	1.02	1	1.16	35	14	11	Carbamidomethylation; TMT10plex	41518	Endophilin-A2 OS=Mus musculus OX=10090 GN=Sh3gl1 PE=1 SV=1
591	7813	Q8R180	1.31	247.71	2078000	1970800	2031100	2005500	1956200	2026600	1.05	1	1.03	1.02	0.99	1.03	2078000	1970800	2031100	2005500	1956200	2026600	1.05	1	1.03	1.02	0.99	1.03	35	16	15	Carbamidomethylation; TMT10plex	54085	ERO1-like protein alpha OS=Mus musculus OX=10090 GN=Ero1a PE=1 SV=2
399	1409	P13864	5.38	247.71	2153900	2176200	2082200	1985300	1878900	1954400	0.99	1	0.96	0.91	0.86	0.9	2153900	2176200	2082200	1985300	1878900	1954400	0.99	1	0.96	0.91	0.86	0.9	22	30	30	Carbamidomethylation; TMT10plex	183188	DNA (cytosine-5)-methyltransferase 1 OS=Mus musculus OX=10090 GN=Dnmt1 PE=1 SV=5
1219	3124	O55234	10.15	247.66	2806800	2448000	3025300	3158100	3030200	3154300	1.15	1	1.24	1.29	1.24	1.29	2806800	2448000	3025300	3158100	3030200	3154300	1.15	1	1.24	1.29	1.24	1.29	59	13	13	Carbamidomethylation; TMT10plex	28532	Proteasome subunit beta type-5 OS=Mus musculus OX=10090 GN=Psmb5 PE=1 SV=3
386	15728	Q9R0P5	9.55	247.64	4288000	5316700	4308700	4719600	5037900	5374400	0.81	1	0.81	0.89	0.95	1.01	4288000	5316700	4308700	4719600	5037900	5374400	0.81	1	0.81	0.89	0.95	1.01	68	14	13	Carbamidomethylation; TMT10plex	18522	Destrin OS=Mus musculus OX=10090 GN=Dstn PE=1 SV=3
751	1877	Q07076	3.08	247.3	1440600	1444700	1388700	1406200	1313300	1325500	1	1	0.96	0.97	0.91	0.92	1440600	1444700	1388700	1406200	1313300	1325500	1	1	0.96	0.97	0.91	0.92	32	14	14	Carbamidomethylation; TMT10plex	49925	Annexin A7 OS=Mus musculus OX=10090 GN=Anxa7 PE=1 SV=2
619	240	P25444	6.48	247.22	7885600	9331900	8821800	8349500	8223500	9334700	0.85	1	0.95	0.89	0.88	1	7885600	9331900	8821800	8349500	8223500	9334700	0.85	1	0.95	0.89	0.88	1	43	12	12	Carbamidomethylation; TMT10plex	31231	40S ribosomal protein S2 OS=Mus musculus OX=10090 GN=Rps2 PE=1 SV=3
1459	4084	Q9Z2G6	34.58	247.21	1651400	1549400	1620300	1577700	2544000	1463900	1.07	1	1.05	1.02	1.64	0.94	1651400	1549400	1620300	1577700	2544000	1463900	1.07	1	1.05	1.02	1.64	0.94	14	9	9	Carbamidomethylation; TMT10plex	88340	Protein sel-1 homolog 1 OS=Mus musculus OX=10090 GN=Sel1l PE=1 SV=2
703	1686	Q8K2T1	4.64	247.16	4072800	4134100	3779200	3610800	4174700	3684000	0.99	1	0.91	0.87	1.01	0.89	4072800	4134100	3779200	3610800	4174700	3684000	0.99	1	0.91	0.87	1.01	0.89	49	14	14	Carbamidomethylation; TMT10plex; Oxidation (M)	34376	NmrA-like family domain-containing protein 1 OS=Mus musculus OX=10090 GN=Nmral1 PE=1 SV=1
1004	15698	Q9Z1Q2	5.26	247.14	1159900	1409100	1241700	1264100	1413700	1168300	0.82	1	0.88	0.9	1	0.83	1159900	1409100	1241700	1264100	1413700	1168300	0.82	1	0.88	0.9	1	0.83	25	13	13	Carbamidomethylation; TMT10plex	63086	Phosphatidylserine lipase ABHD16A OS=Mus musculus OX=10090 GN=Abhd16a PE=1 SV=3
884	15844	P63001	4.51	247.04	6672500	5985600	6445500	5867700	5984100	6320100	1.11	1	1.08	0.98	1	1.06	6672500	5985600	6445500	5867700	5984100	6320100	1.11	1	1.08	0.98	1	1.06	38	10	9	Carbamidomethylation; TMT10plex; Oxidation (M)	21450	Ras-related C3 botulinum toxin substrate 1 OS=Mus musculus OX=10090 GN=Rac1 PE=1 SV=1
548	1147	Q99KJ8	3.11	247.02	8864700	9247100	8866600	8886700	9761300	8822900	0.96	1	0.96	0.96	1.06	0.95	8864700	9247100	8866600	8886700	9761300	8822900	0.96	1	0.96	0.96	1.06	0.95	55	19	19	TMT10plex	44117	Dynactin subunit 2 OS=Mus musculus OX=10090 GN=Dctn2 PE=1 SV=3
622	672	P70333	59.24	246.97	83441	105830	97867	87210	53974	120720	0.79	1	0.92	0.82	0.51	1.14	83441	105830	97867	87210	53974	120720	0.79	1	0.92	0.82	0.51	1.14	10	8	3	Carbamidomethylation; TMT10plex	49280	Heterogeneous nuclear ribonucleoprotein H2 OS=Mus musculus OX=10090 GN=Hnrnph2 PE=1 SV=1
923	13687	P62141	5.14	246.71	451460	564890	512410	528970	470430	532730	0.8	1	0.91	0.94	0.83	0.94	451460	564890	512410	528970	470430	532730	0.8	1	0.91	0.94	0.83	0.94	12	12	3	Carbamidomethylation; TMT10plex	37187	Serine/threonine-protein phosphatase PP1-beta catalytic subunit OS=Mus musculus OX=10090 GN=Ppp1cb PE=1 SV=3
924	4030	Q922Q4	9.33	246.71	4110600	3999400	3906500	3759900	3217600	4060400	1.03	1	0.98	0.94	0.8	1.02	4110600	3999400	3906500	3759900	3217600	4060400	1.03	1	0.98	0.94	0.8	1.02	28	13	10	TMT10plex	33659	Pyrroline-5-carboxylate reductase 2 OS=Mus musculus OX=10090 GN=Pycr2 PE=1 SV=1
941	1797	P28656	9.41	246.61	2427200	2201100	2174700	1935700	1962600	2456300	1.1	1	0.99	0.88	0.89	1.12	2427200	2201100	2174700	1935700	1962600	2456300	1.1	1	0.99	0.88	0.89	1.12	22	10	8	Carbamidomethylation; TMT10plex; Oxidation (M)	45345	Nucleosome assembly protein 1-like 1 OS=Mus musculus OX=10090 GN=Nap1l1 PE=1 SV=2
506	960	Q02257	6.97	246.59	1806800	1784100	1894100	1710300	1586200	1855800	1.01	1	1.06	0.96	0.89	1.04	1806800	1784100	1894100	1710300	1586200	1855800	1.01	1	1.06	0.96	0.89	1.04	26	20	17	Carbamidomethylation; TMT10plex; Oxidation (M)	81801	Junction plakoglobin OS=Mus musculus OX=10090 GN=Jup PE=1 SV=3
674	3035	Q8BZ98	20.84	246.57	389040	343320	436130	411510	355730	302380	1.13	1	1.27	1.2	1.04	0.88	389040	343320	436130	411510	355730	302380	1.13	1	1.27	1.2	1.04	0.88	10	18	7	Carbamidomethylation; TMT10plex	97190	Dynamin-3 OS=Mus musculus OX=10090 GN=Dnm3 PE=1 SV=1
479	280	P97427	1.08	246.42	3257400	3255600	3236300	3321100	3364900	3216600	1	1	0.99	1.02	1.03	0.99	3257400	3255600	3236300	3321100	3364900	3216600	1	1	0.99	1.02	1.03	0.99	20	15	11	Carbamidomethylation; TMT10plex	62168	Dihydropyrimidinase-related protein 1 OS=Mus musculus OX=10090 GN=Crmp1 PE=1 SV=1
1365	6708	P60487	14.69	246.38	904590	961200	1057600	1036600	1180800	788180	0.94	1	1.1	1.08	1.23	0.82	904590	961200	1057600	1036600	1180800	788180	0.94	1	1.1	1.08	1.23	0.82	44	10	10	Carbamidomethylation; TMT10plex	31512	Pyridoxal phosphate phosphatase OS=Mus musculus OX=10090 GN=Pdxp PE=1 SV=1
616	1926	P13020	1.84	246.25	3614700	3382200	3441600	3588200	3268700	3536700	1.07	1	1.02	1.06	0.97	1.05	3614700	3382200	3441600	3588200	3268700	3536700	1.07	1	1.02	1.06	0.97	1.05	23	17	17	Carbamidomethylation; TMT10plex	85942	Gelsolin OS=Mus musculus OX=10090 GN=Gsn PE=1 SV=3
1248	2808	P47740	11.16	246.21	2062800	2136800	2120400	2370500	1671600	1975700	0.97	1	0.99	1.11	0.78	0.92	2062800	2136800	2120400	2370500	1671600	1975700	0.97	1	0.99	1.11	0.78	0.92	21	11	10	Carbamidomethylation; TMT10plex	53971	Aldehyde dehydrogenase family 3 member A2 OS=Mus musculus OX=10090 GN=Aldh3a2 PE=1 SV=2
907	10899	Q91W90	5.59	246.16	2011000	1786600	1933800	2106600	1992900	2249300	1.13	1	1.08	1.18	1.12	1.26	2011000	1786600	1933800	2106600	1992900	2249300	1.13	1	1.08	1.18	1.12	1.26	33	11	11	Carbamidomethylation; TMT10plex	46416	Thioredoxin domain-containing protein 5 OS=Mus musculus OX=10090 GN=Txndc5 PE=1 SV=2
933	1078	P06837	13.89	246.12	3136000	3594500	3447000	3795900	4577200	3752100	0.87	1	0.96	1.06	1.27	1.04	3136000	3594500	3447000	3795900	4577200	3752100	0.87	1	0.96	1.06	1.27	1.04	62	11	11	TMT10plex	23632	Neuromodulin OS=Mus musculus OX=10090 GN=Gap43 PE=1 SV=1
772	941	P60670	5.43	246.08	1165300	1165300	1246000	1063100	1179500	1074700	1	1	1.07	0.91	1.01	0.92	1165300	1165300	1246000	1063100	1179500	1074700	1	1	1.07	0.91	1.01	0.92	28	15	15	Carbamidomethylation; TMT10plex	68017	Nuclear protein localization protein 4 homolog OS=Mus musculus OX=10090 GN=Nploc4 PE=1 SV=3
501	352	Q8R050	7.08	245.91	8974900	8762700	8516300	8362800	7323100	9232100	1.02	1	0.97	0.95	0.84	1.05	8974900	8762700	8516300	8362800	7323100	9232100	1.02	1	0.97	0.95	0.84	1.05	28	19	19	Carbamidomethylation; TMT10plex	68626	Eukaryotic peptide chain release factor GTP-binding subunit ERF3A OS=Mus musculus OX=10090 GN=Gspt1 PE=1 SV=2
807	4925	Q80WQ2	5.32	245.85	2314300	2311500	2267900	2155100	1998000	2079100	1	1	0.98	0.93	0.86	0.9	2314300	2311500	2267900	2155100	1998000	2079100	1	1	0.98	0.93	0.86	0.9	21	14	14	Carbamidomethylation; TMT10plex	88048	Protein VAC14 homolog OS=Mus musculus OX=10090 GN=Vac14 PE=1 SV=1
683	1289	P01902	7.28	245.67	983090	1089800	1045800	848960	1161300	999210	0.9	1	0.96	0.78	1.07	0.92	983090	1089800	1045800	848960	1161300	999210	0.9	1	0.96	0.78	1.07	0.92	34	15	11	Carbamidomethylation; TMT10plex	41490	H-2 class I histocompatibility antigen K-D alpha chain OS=Mus musculus OX=10090 GN=H2-K1 PE=1 SV=1
706	4248	Q8VC30	11.06	245.48	3015900	3012700	3139100	3098400	2459000	2921700	1	1	1.04	1.03	0.82	0.97	3015900	3012700	3139100	3098400	2459000	2921700	1	1	1.04	1.03	0.82	0.97	33	16	16	Carbamidomethylation; TMT10plex	59691	Triokinase/FMN cyclase OS=Mus musculus OX=10090 GN=Tkfc PE=1 SV=1
788	2428	Q99K51	6.77	245.27	3118500	2821700	2714600	2540400	2726400	2762500	1.11	1	0.96	0.9	0.97	0.98	3118500	2821700	2714600	2540400	2726400	2762500	1.11	1	0.96	0.9	0.97	0.98	26	17	14	Carbamidomethylation; TMT10plex	70742	Plastin-3 OS=Mus musculus OX=10090 GN=Pls3 PE=1 SV=3
519	2931	Q920E5	5.61	245.2	15409000	14494000	14133000	14770000	12457000	13734000	1.06	1	0.98	1.02	0.86	0.95	15409000	14494000	14133000	14770000	12457000	13734000	1.06	1	0.98	1.02	0.86	0.95	40	14	14	Carbamidomethylation; TMT10plex; Oxidation (M)	40582	Farnesyl pyrophosphate synthase OS=Mus musculus OX=10090 GN=Fdps PE=1 SV=1
1116	8730	Q9Z2U1	13.1	245.11	2639600	2309700	2835300	2514500	2158000	2560800	1.14	1	1.23	1.09	0.93	1.11	2639600	2309700	2835300	2514500	2158000	2560800	1.14	1	1.23	1.09	0.93	1.11	39	8	8	TMT10plex; Oxidation (M)	26411	Proteasome subunit alpha type-5 OS=Mus musculus OX=10090 GN=Psma5 PE=1 SV=1
791	4964	Q07417	2.19	244.86	2502100	2636200	2567300	2492200	2455300	2388800	0.95	1	0.97	0.95	0.93	0.91	2502100	2636200	2567300	2492200	2455300	2388800	0.95	1	0.97	0.95	0.93	0.91	40	14	14	Carbamidomethylation; TMT10plex	44890	Short-chain specific acyl-CoA dehydrogenase mitochondrial OS=Mus musculus OX=10090 GN=Acads PE=1 SV=2
1444	14906	O89023	10.12	244.86	1531800	1418300	1624400	1339900	1640200	1290700	1.08	1	1.15	0.94	1.16	0.91	1531800	1418300	1624400	1339900	1640200	1290700	1.08	1	1.15	0.94	1.16	0.91	21	9	9	Carbamidomethylation; TMT10plex	61342	Tripeptidyl-peptidase 1 OS=Mus musculus OX=10090 GN=Tpp1 PE=1 SV=2
803	15749	P14869	17.35	244.7	8021900	10453000	8733400	9179100	7538300	8324900	0.77	1	0.84	0.88	0.72	0.8	8021900	10453000	8733400	9179100	7538300	8324900	0.77	1	0.84	0.88	0.72	0.8	37	12	12	Carbamidomethylation; TMT10plex	34216	60S acidic ribosomal protein P0 OS=Mus musculus OX=10090 GN=Rplp0 PE=1 SV=3
755	1376	E9Q6J5	4.37	244.62	1029500	944510	1083000	1096600	983310	1125900	1.09	1	1.15	1.16	1.04	1.19	1029500	944510	1083000	1096600	983310	1125900	1.09	1	1.15	1.16	1.04	1.19	8	17	17	Carbamidomethylation; TMT10plex	327453	Biorientation of chromosomes in cell division protein 1-like 1 OS=Mus musculus OX=10090 GN=Bod1l PE=1 SV=1
496	4113	P62983	51.45	244.5	2617500	1992300	3712200	3445800	3383800	5339500	1.31	1	1.86	1.73	1.7	2.68	2617500	1992300	3712200	3445800	3383800	5339500	1.31	1	1.86	1.73	1.7	2.68	59	8	8	Carbamidomethylation; TMT10plex; Oxidation (M)	17951	Ubiquitin-40S ribosomal protein S27a OS=Mus musculus OX=10090 GN=Rps27a PE=1 SV=2
1239	9973	Q8R4N0	18.49	244.45	693850	680240	748810	667020	532890	594150	1.02	1	1.1	0.98	0.78	0.87	693850	680240	748810	667020	532890	594150	1.02	1	1.1	0.98	0.78	0.87	26	9	9	Carbamidomethylation; TMT10plex	37549	Citramalyl-CoA lyase mitochondrial OS=Mus musculus OX=10090 GN=Clybl PE=1 SV=2
824	306	Q9JMH9	9.57	244.12	3192300	3808200	3004400	3415600	3552300	3084200	0.84	1	0.79	0.9	0.93	0.81	3192300	3808200	3004400	3415600	3552300	3084200	0.84	1	0.79	0.9	0.93	0.81	10	17	17	Carbamidomethylation; TMT10plex	232753	Unconventional myosin-XVIIIa OS=Mus musculus OX=10090 GN=Myo18a PE=1 SV=2
687	2628	P42227	13.96	243.97	4220100	4617400	4135400	4346000	3473900	4067600	0.91	1	0.9	0.94	0.75	0.88	4220100	4617400	4135400	4346000	3473900	4067600	0.91	1	0.9	0.94	0.75	0.88	30	20	20	Carbamidomethylation; TMT10plex	88054	Signal transducer and activator of transcription 3 OS=Mus musculus OX=10090 GN=Stat3 PE=1 SV=2
671	6584	Q9EQH3	5.74	243.79	1666600	1691000	1500500	1458900	1582100	1288400	0.99	1	0.89	0.86	0.94	0.76	1666600	1691000	1500500	1458900	1582100	1288400	0.99	1	0.89	0.86	0.94	0.76	22	16	16	Carbamidomethylation; TMT10plex	91713	Vacuolar protein sorting-associated protein 35 OS=Mus musculus OX=10090 GN=Vps35 PE=1 SV=1
698	2212	Q9D2G2	3.67	243.78	14142000	13777000	14696000	13505000	13477000	13172000	1.03	1	1.07	0.98	0.98	0.96	14142000	13777000	14696000	13505000	13477000	13172000	1.03	1	1.07	0.98	0.98	0.96	36	12	12	Carbamidomethylation; TMT10plex	48995	Dihydrolipoyllysine-residue succinyltransferase component of 2-oxoglutarate dehydrogenase complex mitochondrial OS=Mus musculus OX=10090 GN=Dlst PE=1 SV=1
1146	488	Q9QWY8	7.61	243.76	487860	493300	506810	451150	419580	533260	0.99	1	1.03	0.91	0.85	1.08	487860	493300	506810	451150	419580	533260	0.99	1	1.03	0.91	0.85	1.08	13	11	11	Carbamidomethylation; TMT10plex	127421	Arf-GAP with SH3 domain ANK repeat and PH domain-containing protein 1 OS=Mus musculus OX=10090 GN=Asap1 PE=1 SV=2
424	428	P30416	3.03	243.57	4822100	5360800	4831400	4835700	4879800	5043200	0.9	1	0.9	0.9	0.91	0.94	4822100	5360800	4831400	4835700	4879800	5043200	0.9	1	0.9	0.9	0.91	0.94	47	23	23	Carbamidomethylation; TMT10plex	51572	Peptidyl-prolyl cis-trans isomerase FKBP4 OS=Mus musculus OX=10090 GN=Fkbp4 PE=1 SV=5
489	103	P63325	10.49	243.52	6861700	8028900	6605700	7576100	6343700	6871400	0.85	1	0.82	0.94	0.79	0.86	6861700	8028900	6605700	7576100	6343700	6871400	0.85	1	0.82	0.94	0.79	0.86	54	11	11	TMT10plex; Oxidation (M)	18916	40S ribosomal protein S10 OS=Mus musculus OX=10090 GN=Rps10 PE=1 SV=1
451	2128	P09055	12.17	243.43	1462900	1434900	1510800	1279300	1272400	1164700	1.02	1	1.05	0.89	0.89	0.81	1462900	1434900	1510800	1279300	1272400	1164700	1.02	1	1.05	0.89	0.89	0.81	26	18	18	Carbamidomethylation; TMT10plex	88231	Integrin beta-1 OS=Mus musculus OX=10090 GN=Itgb1 PE=1 SV=1
633	822	Q3UQ44	4.91	243.34	993080	1035300	1063900	1071400	927530	954320	0.96	1	1.03	1.03	0.9	0.92	993080	1035300	1063900	1071400	927530	954320	0.96	1	1.03	1.03	0.9	0.92	13	21	17	Carbamidomethylation; TMT10plex	180527	Ras GTPase-activating-like protein IQGAP2 OS=Mus musculus OX=10090 GN=Iqgap2 PE=1 SV=2
630	257	P15105	33.89	243.23	5658300	5856500	5967300	6691400	9559700	6557700	0.97	1	1.02	1.14	1.63	1.12	5658300	5856500	5967300	6691400	9559700	6557700	0.97	1	1.02	1.14	1.63	1.12	37	14	14	Carbamidomethylation; TMT10plex; Oxidation (M)	42120	Glutamine synthetase OS=Mus musculus OX=10090 GN=Glul PE=1 SV=6
298	1064	O08795	17.63	243.13	22676000	20941000	23279000	25365000	28137000	31116000	1.08	1	1.11	1.21	1.34	1.49	22676000	20941000	23279000	25365000	28137000	31116000	1.08	1	1.11	1.21	1.34	1.49	26	19	19	Carbamidomethylation; TMT10plex	58793	Glucosidase 2 subunit beta OS=Mus musculus OX=10090 GN=Prkcsh PE=1 SV=1
637	558	Q3TKT4	16.72	243.12	794980	892140	920430	910020	758110	668820	0.89	1	1.03	1.02	0.85	0.75	794980	892140	920430	910020	758110	668820	0.89	1	1.03	1.02	0.85	0.75	10	20	13	TMT10plex	181426	Transcription activator BRG1 OS=Mus musculus OX=10090 GN=Smarca4 PE=1 SV=1
1489	1272	Q9CZM2	6.57	243.08	5003600	5893500	5618000	4971800	6410600	5101300	0.85	1	0.95	0.84	1.09	0.87	5003600	5893500	5618000	4971800	6410600	5101300	0.85	1	0.95	0.84	1.09	0.87	39	8	8	TMT10plex	24146	60S ribosomal protein L15 OS=Mus musculus OX=10090 GN=Rpl15 PE=1 SV=4
613	2303	Q63844	7.78	243.06	2138000	2135000	2209800	1824200	1974900	2098400	1	1	1.04	0.85	0.93	0.98	2138000	2135000	2209800	1824200	1974900	2098400	1	1	1.04	0.85	0.93	0.98	31	14	10	TMT10plex	43067	Mitogen-activated protein kinase 3 OS=Mus musculus OX=10090 GN=Mapk3 PE=1 SV=5
589	525	Q80UM3	3.12	242.97	2654800	2674600	2604100	2548800	2521800	2364900	0.99	1	0.97	0.95	0.94	0.88	2654800	2674600	2604100	2548800	2521800	2364900	0.99	1	0.97	0.95	0.94	0.88	23	21	19	Carbamidomethylation; TMT10plex	100961	N-alpha-acetyltransferase 15 NatA auxiliary subunit OS=Mus musculus OX=10090 GN=Naa15 PE=1 SV=1
1261	1539	P46664	9.98	242.88	1082600	1173200	882710	1042900	972830	875020	0.92	1	0.75	0.89	0.83	0.75	1082600	1173200	882710	1042900	972830	875020	0.92	1	0.75	0.89	0.83	0.75	27	12	10	Carbamidomethylation; TMT10plex	50021	Adenylosuccinate synthetase isozyme 2 OS=Mus musculus OX=10090 GN=Adss2 PE=1 SV=2
1042	5071	Q71LX4	8.81	242.79	36561	34261	33736	60205	112060	0	1.07	1	0.98	1.76	3.27	0	36561	34261	33736	60205	112060	0	1.07	1	0.98	1.76	3.27	0	0	13	1	TMT10plex	253618	Talin-2 OS=Mus musculus OX=10090 GN=Tln2 PE=1 SV=3
813	3109	P70698	11.44	242.78	1903100	1588800	1880200	1708200	1464800	1763200	1.2	1	1.18	1.08	0.92	1.11	1903100	1588800	1880200	1708200	1464800	1763200	1.2	1	1.18	1.08	0.92	1.11	23	15	14	Carbamidomethylation; TMT10plex	66683	CTP synthase 1 OS=Mus musculus OX=10090 GN=Ctps1 PE=1 SV=2
1463	3098	Q8VCT3	13.73	242.61	461430	448780	498330	510230	446170	376070	1.03	1	1.11	1.14	0.99	0.84	461430	448780	498330	510230	446170	376070	1.03	1	1.11	1.14	0.99	0.84	20	10	10	Carbamidomethylation; TMT10plex	72416	Aminopeptidase B OS=Mus musculus OX=10090 GN=Rnpep PE=1 SV=2
847	2184	Q9JMA1	18.88	242.35	1922900	1933200	2151000	1638800	1951500	1523900	0.99	1	1.11	0.85	1.01	0.79	1922900	1933200	2151000	1638800	1951500	1523900	0.99	1	1.11	0.85	1.01	0.79	43	15	15	Carbamidomethylation; TMT10plex; Oxidation (M)	56002	Ubiquitin carboxyl-terminal hydrolase 14 OS=Mus musculus OX=10090 GN=Usp14 PE=1 SV=3
1340	8091	Q9WTS6	35.77	242.32	74558	87449	83216	70515	52740	88322	0.85	1	0.95	0.81	0.6	1.01	74558	87449	83216	70515	52740	88322	0.85	1	0.95	0.81	0.6	1.01	7	12	12	Carbamidomethylation; TMT10plex	303065	Teneurin-3 OS=Mus musculus OX=10090 GN=Tenm3 PE=1 SV=1
460	432	Q61937	7.58	242.3	13091000	13854000	15314000	15431000	16310000	16177000	0.94	1	1.11	1.11	1.18	1.17	13091000	13854000	15314000	15431000	16310000	16177000	0.94	1	1.11	1.11	1.18	1.17	47	12	12	Carbamidomethylation; TMT10plex; Oxidation (M); Acetylation (Protein N-term)	32560	Nucleophosmin OS=Mus musculus OX=10090 GN=Npm1 PE=1 SV=1
802	1793	P46978	71.03	241.79	2784300	2989000	2401500	2711400	5055800	3006100	0.93	1	0.8	0.91	1.69	1.01	2784300	2989000	2401500	2711400	5055800	3006100	0.93	1	0.8	0.91	1.69	1.01	15	13	12	Carbamidomethylation; TMT10plex	80598	Dolichyl-diphosphooligosaccharide--protein glycosyltransferase subunit STT3A OS=Mus musculus OX=10090 GN=Stt3a PE=1 SV=1
1665	15750	Q9Z315	23.14	241.72	123620	130870	151830	131220	168720	102740	0.94	1	1.16	1	1.29	0.79	123620	130870	151830	131220	168720	102740	0.94	1	1.16	1	1.29	0.79	16	9	9	Carbamidomethylation; TMT10plex	90885	U4/U6.U5 tri-snRNP-associated protein 1 OS=Mus musculus OX=10090 GN=Sart1 PE=1 SV=1
422	3104	Q3UTJ2	16.5	241.71	2572900	2889000	2971900	3609000	3883900	4079100	0.89	1	1.03	1.25	1.34	1.41	2572900	2889000	2971900	3609000	3883900	4079100	0.89	1	1.03	1.25	1.34	1.41	20	24	23	TMT10plex	132349	Sorbin and SH3 domain-containing protein 2 OS=Mus musculus OX=10090 GN=Sorbs2 PE=1 SV=2
1818	1472	O89017	13.08	241.66	1766100	1460600	1929400	1609900	1650900	1579900	1.21	1	1.32	1.1	1.13	1.08	1766100	1460600	1929400	1609900	1650900	1579900	1.21	1	1.32	1.1	1.13	1.08	26	9	9	Carbamidomethylation; TMT10plex	49373	Legumain OS=Mus musculus OX=10090 GN=Lgmn PE=1 SV=1
476	3240	P45376	4.74	241.39	12396000	13766000	12045000	12464000	12557000	12288000	0.9	1	0.87	0.91	0.91	0.89	12396000	13766000	12045000	12464000	12557000	12288000	0.9	1	0.87	0.91	0.91	0.89	45	15	14	Carbamidomethylation; TMT10plex	35732	Aldo-keto reductase family 1 member B1 OS=Mus musculus OX=10090 GN=Akr1b1 PE=1 SV=3
1143	7882	Q64324	10.05	241.34	1490600	1447200	1543900	1480200	1266800	1228100	1.03	1	1.07	1.02	0.88	0.85	1490600	1447200	1543900	1480200	1266800	1228100	1.03	1	1.07	1.02	0.88	0.85	21	12	10	Carbamidomethylation; TMT10plex	66358	Syntaxin-binding protein 2 OS=Mus musculus OX=10090 GN=Stxbp2 PE=1 SV=1
655	5580	Q8BGH2	5.2	241.33	2111100	2155100	1862600	2068500	2149400	2062000	0.98	1	0.86	0.96	1	0.96	2111100	2155100	1862600	2068500	2149400	2062000	0.98	1	0.86	0.96	1	0.96	38	13	13	Carbamidomethylation; TMT10plex	51864	Sorting and assembly machinery component 50 homolog OS=Mus musculus OX=10090 GN=Samm50 PE=1 SV=1
1178	223	P46097	5.43	241.25	427590	451360	469580	422920	447260	405050	0.95	1	1.04	0.94	0.99	0.9	427590	451360	469580	422920	447260	405050	0.95	1	1.04	0.94	0.99	0.9	22	10	8	Carbamidomethylation; TMT10plex	47263	Synaptotagmin-2 OS=Mus musculus OX=10090 GN=Syt2 PE=1 SV=1
1057	1043	Q6PAR5	18.46	241.2	767770	690430	737020	684380	524710	675110	1.11	1	1.07	0.99	0.76	0.98	767770	690430	737020	684380	524710	675110	1.11	1	1.07	0.99	0.76	0.98	12	12	12	Carbamidomethylation; TMT10plex	162401	GTPase-activating protein and VPS9 domain-containing protein 1 OS=Mus musculus OX=10090 GN=Gapvd1 PE=1 SV=2
603	3145	Q9D1Q6	6.6	241.18	8779500	8815200	8199600	8794100	7433100	8630600	1	1	0.93	1	0.84	0.98	8779500	8815200	8199600	8794100	7433100	8630600	1	1	0.93	1	0.84	0.98	29	13	12	Carbamidomethylation; TMT10plex	46853	Endoplasmic reticulum resident protein 44 OS=Mus musculus OX=10090 GN=Erp44 PE=1 SV=1
728	14749	Q8K0C9	6.66	240.53	1931500	2025500	1811400	1886400	1706100	1856500	0.95	1	0.89	0.93	0.84	0.92	1931500	2025500	1811400	1886400	1706100	1856500	0.95	1	0.89	0.93	0.84	0.92	38	11	11	Carbamidomethylation; TMT10plex	41985	GDP-mannose 4 6 dehydratase OS=Mus musculus OX=10090 GN=Gmds PE=1 SV=1
995	798	P10404	4.35	240.36	1105800	1162500	1006400	1003200	1124900	1115000	0.95	1	0.87	0.86	0.97	0.96	1105800	1162500	1006400	1003200	1124900	1115000	0.95	1	0.87	0.86	0.97	0.96	16	13	8	Carbamidomethylation; TMT10plex	69613	MLV-related proviral Env polyprotein OS=Mus musculus OX=10090 PE=1 SV=3
1023	2259	Q8BWF0	1.97	240.35	1468500	1485500	1410700	1507600	1435000	1320800	0.99	1	0.95	1.01	0.97	0.89	1468500	1485500	1410700	1507600	1435000	1320800	0.99	1	0.95	1.01	0.97	0.89	26	14	14	Carbamidomethylation; TMT10plex	55968	Succinate-semialdehyde dehydrogenase mitochondrial OS=Mus musculus OX=10090 GN=Aldh5a1 PE=1 SV=1
348	16078	P08228	42.26	240.33	38610000	30631000	39351000	49144000	53444000	54339000	1.26	1	1.28	1.6	1.74	1.77	38610000	30631000	39351000	49144000	53444000	54339000	1.26	1	1.28	1.6	1.74	1.77	48	9	9	Carbamidomethylation; TMT10plex; Oxidation (M)	15943	Superoxide dismutase [Cu-Zn] OS=Mus musculus OX=10090 GN=Sod1 PE=1 SV=2
738	15918	P35979	11.66	240.08	4629900	5552600	4578400	4848900	4311800	5107900	0.83	1	0.82	0.87	0.78	0.92	4629900	5552600	4578400	4848900	4311800	5107900	0.83	1	0.82	0.87	0.78	0.92	63	9	9	Carbamidomethylation; TMT10plex	17805	60S ribosomal protein L12 OS=Mus musculus OX=10090 GN=Rpl12 PE=1 SV=2
1310	15994	O55042	6.86	239.88	522050	573810	474240	474720	483370	519140	0.91	1	0.83	0.83	0.84	0.9	522050	573810	474240	474720	483370	519140	0.91	1	0.83	0.83	0.84	0.9	46	9	6	TMT10plex	14485	Alpha-synuclein OS=Mus musculus OX=10090 GN=Snca PE=1 SV=2
896	3356	Q9QUM9	2.6	239.71	4054700	3764100	4014400	4104400	4014500	4216900	1.08	1	1.07	1.09	1.07	1.12	4054700	3764100	4014400	4104400	4014500	4216900	1.08	1	1.07	1.09	1.07	1.12	52	12	12	Carbamidomethylation; TMT10plex	27372	Proteasome subunit alpha type-6 OS=Mus musculus OX=10090 GN=Psma6 PE=1 SV=1
1238	4863	P29351	5.22	239.6	403950	439480	434070	436120	501060	423250	0.92	1	0.99	0.99	1.14	0.96	403950	439480	434070	436120	501060	423250	0.92	1	0.99	0.99	1.14	0.96	20	10	10	Carbamidomethylation; TMT10plex	67559	Tyrosine-protein phosphatase non-receptor type 6 OS=Mus musculus OX=10090 GN=Ptpn6 PE=1 SV=2
714	3932	Q99MD9	6.51	239.48	10392000	8927200	9372800	8664300	8386800	10418000	1.16	1	1.05	0.97	0.94	1.17	10392000	8927200	9372800	8664300	8386800	10418000	1.16	1	1.05	0.97	0.94	1.17	14	11	11	Carbamidomethylation; TMT10plex	83954	Nuclear autoantigenic sperm protein OS=Mus musculus OX=10090 GN=Nasp PE=1 SV=2
955	845	Q5H8C4	3.94	239.46	1000400	973250	931670	852650	900020	829650	1.03	1	0.96	0.88	0.92	0.85	1000400	973250	931670	852650	900020	829650	1.03	1	0.96	0.88	0.92	0.85	5	14	14	TMT10plex	359402	Vacuolar protein sorting-associated protein 13A OS=Mus musculus OX=10090 GN=Vps13a PE=1 SV=1
1141	8093	Q80U72	15.44	239.35	473260	465050	424920	433360	343300	470560	1.02	1	0.91	0.93	0.74	1.01	473260	465050	424920	433360	343300	470560	1.02	1	0.91	0.93	0.74	1.01	12	14	14	TMT10plex	174058	Protein scribble homolog OS=Mus musculus OX=10090 GN=Scrib PE=1 SV=2
362	2920	P18242	8.13	239.34	10647000	11595000	11282000	9330900	10802000	9909500	0.92	1	0.97	0.8	0.93	0.85	10647000	11595000	11282000	9330900	10802000	9909500	0.92	1	0.97	0.8	0.93	0.85	38	14	14	Carbamidomethylation; TMT10plex; Oxidation (M)	44954	Cathepsin D OS=Mus musculus OX=10090 GN=Ctsd PE=1 SV=1
969	2362	Q8K0D5	3.74	239.27	2715500	2691200	2610900	2399400	2412200	2346000	1.01	1	0.97	0.89	0.9	0.87	2715500	2691200	2610900	2399400	2412200	2346000	1.01	1	0.97	0.89	0.9	0.87	22	15	15	Carbamidomethylation; TMT10plex	83550	Elongation factor G mitochondrial OS=Mus musculus OX=10090 GN=Gfm1 PE=1 SV=1
540	191	Q6IRU2	24.5	239.16	3788400	3572700	4159500	4211900	5352300	5166600	1.06	1	1.16	1.18	1.5	1.45	3788400	3572700	4159500	4211900	5352300	5166600	1.06	1	1.16	1.18	1.5	1.45	42	16	13	TMT10plex	28468	Tropomyosin alpha-4 chain OS=Mus musculus OX=10090 GN=Tpm4 PE=1 SV=3
618	15696	P13439	6.55	239.03	4056200	4678700	3842900	4011200	4054000	3977300	0.87	1	0.82	0.86	0.87	0.85	4056200	4678700	3842900	4011200	4054000	3977300	0.87	1	0.82	0.86	0.87	0.85	36	19	19	Carbamidomethylation; TMT10plex	52292	Uridine 5'-monophosphate synthase OS=Mus musculus OX=10090 GN=Umps PE=1 SV=3
297	2683	Q99K48	1.8	239	9207800	9549500	9037900	9499900	8985300	8986700	0.96	1	0.95	0.99	0.94	0.94	9207800	9549500	9037900	9499900	8985300	8986700	0.96	1	0.95	0.99	0.94	0.94	32	19	18	TMT10plex; Oxidation (M)	54541	Non-POU domain-containing octamer-binding protein OS=Mus musculus OX=10090 GN=Nono PE=1 SV=3
1487	3049	Q921S7	6.79	239	1035000	1017400	988250	956760	894070	830350	1.02	1	0.97	0.94	0.88	0.82	1035000	1017400	988250	956760	894070	830350	1.02	1	0.97	0.94	0.88	0.82	27	11	11	Carbamidomethylation; TMT10plex	48341	39S ribosomal protein L37 mitochondrial OS=Mus musculus OX=10090 GN=Mrpl37 PE=1 SV=1
917	6824	Q8BJW6	5.72	238.92	2319900	2121800	2032900	2243300	1819600	2206200	1.09	1	0.96	1.06	0.86	1.04	2319900	2121800	2032900	2243300	1819600	2206200	1.09	1	0.96	1.06	0.86	1.04	34	16	16	Carbamidomethylation; TMT10plex	64403	Eukaryotic translation initiation factor 2A OS=Mus musculus OX=10090 GN=Eif2a PE=1 SV=2
842	3850	P29416	7.53	238.85	3048400	3496800	3126700	2917900	3771100	2981200	0.87	1	0.89	0.83	1.08	0.85	3048400	3496800	3126700	2917900	3771100	2981200	0.87	1	0.89	0.83	1.08	0.85	29	13	13	Carbamidomethylation; TMT10plex	60613	Beta-hexosaminidase subunit alpha OS=Mus musculus OX=10090 GN=Hexa PE=1 SV=2
2104	16025	O35609	6.62	238.8	1518900	1361500	1312400	1280200	1195800	1390600	1.12	1	0.96	0.94	0.88	1.02	1518900	1361500	1312400	1280200	1195800	1390600	1.12	1	0.96	0.94	0.88	1.02	24	6	6	TMT10plex	38458	Secretory carrier-associated membrane protein 3 OS=Mus musculus OX=10090 GN=Scamp3 PE=1 SV=3
1369	15829	P35278	9.4	238.73	276140	221480	220360	212250	182830	187630	1.25	1	0.99	0.96	0.83	0.85	276140	221480	220360	212250	182830	187630	1.25	1	0.99	0.96	0.83	0.85	33	8	5	TMT10plex	23412	Ras-related protein Rab-5C OS=Mus musculus OX=10090 GN=Rab5c PE=1 SV=2
526	8907	Q3UHX2	20.15	238.71	10506000	9665200	12267000	13118000	13837000	14706000	1.09	1	1.27	1.36	1.43	1.52	10506000	9665200	12267000	13118000	13837000	14706000	1.09	1	1.27	1.36	1.43	1.52	53	11	11	TMT10plex	20605	28 kDa heat- and acid-stable phosphoprotein OS=Mus musculus OX=10090 GN=Pdap1 PE=1 SV=1
1791	8271	Q9R1Q8	8.49	238.67	651210	686370	655040	683030	740920	803190	0.95	1	0.95	1	1.08	1.17	651210	686370	655040	683030	740920	803190	0.95	1	0.95	1	1.08	1.17	28	9	7	Carbamidomethylation; TMT10plex	22471	Transgelin-3 OS=Mus musculus OX=10090 GN=Tagln3 PE=1 SV=1
1053	14567	Q8R1Q8	10.81	238.61	1991800	2165400	2044900	1702500	1768900	1756000	0.92	1	0.94	0.79	0.82	0.81	1991800	2165400	2044900	1702500	1768900	1756000	0.92	1	0.94	0.79	0.82	0.81	27	12	12	TMT10plex	56614	Cytoplasmic dynein 1 light intermediate chain 1 OS=Mus musculus OX=10090 GN=Dync1li1 PE=1 SV=1
1121	7131	Q9EPJ9	6.57	238.59	396000	474180	382590	433490	433970	406020	0.84	1	0.81	0.91	0.92	0.86	396000	474180	382590	433490	433970	406020	0.84	1	0.81	0.91	0.92	0.86	37	12	12	Carbamidomethylation; TMT10plex	45288	ADP-ribosylation factor GTPase-activating protein 1 OS=Mus musculus OX=10090 GN=Arfgap1 PE=1 SV=2
552	647	Q9EPN1	8.42	238.47	1081300	1002600	1067200	972960	871380	929880	1.08	1	1.06	0.97	0.87	0.93	1081300	1002600	1067200	972960	871380	929880	1.08	1	1.06	0.97	0.87	0.93	9	23	18	Carbamidomethylation; TMT10plex	326742	Neurobeachin OS=Mus musculus OX=10090 GN=Nbea PE=1 SV=1
1189	2448	P17225	21.17	238.41	249510	316130	262900	268810	338240	380540	0.79	1	0.83	0.85	1.07	1.2	249510	316130	262900	268810	338240	380540	0.79	1	0.83	0.85	1.07	1.2	13	8	5	Carbamidomethylation; TMT10plex	56478	Polypyrimidine tract-binding protein 1 OS=Mus musculus OX=10090 GN=Ptbp1 PE=1 SV=2
184	415	P35700	6.99	238.3	23322000	22449000	24723000	21302000	20716000	20696000	1.04	1	1.1	0.95	0.92	0.92	23322000	22449000	24723000	21302000	20716000	20696000	1.04	1	1.1	0.95	0.92	0.92	59	17	15	Carbamidomethylation; TMT10plex; Oxidation (M)	22176	Peroxiredoxin-1 OS=Mus musculus OX=10090 GN=Prdx1 PE=1 SV=1
1047	1506	Q9Z0U1	4.56	238.24	916460	912090	988830	1060100	1009200	936660	1	1	1.08	1.16	1.11	1.03	916460	912090	988830	1060100	1009200	936660	1	1	1.08	1.16	1.11	1.03	14	15	15	Carbamidomethylation; TMT10plex	131280	Tight junction protein ZO-2 OS=Mus musculus OX=10090 GN=Tjp2 PE=1 SV=2
1798	10890	Q59J78	17.29	238.16	514710	724980	572390	620730	793100	611090	0.71	1	0.79	0.86	1.09	0.84	514710	724980	572390	620730	793100	611090	0.71	1	0.79	0.86	1.09	0.84	57	8	8	TMT10plex	19628	NADH dehydrogenase [ubiquinone] 1 alpha subcomplex assembly factor 2 OS=Mus musculus OX=10090 GN=Ndufaf2 PE=1 SV=1
1333	4321	Q61753	21.08	237.97	1112300	1061200	1345600	1076300	972520	930460	1.05	1	1.27	1.01	0.92	0.88	1112300	1061200	1345600	1076300	972520	930460	1.05	1	1.27	1.01	0.92	0.88	27	12	12	Carbamidomethylation; TMT10plex	56586	D-3-phosphoglycerate dehydrogenase OS=Mus musculus OX=10090 GN=Phgdh PE=1 SV=3
828	2117	Q3U319	10.82	237.75	775790	812870	704960	784450	639110	740420	0.95	1	0.87	0.97	0.79	0.91	775790	812870	704960	784450	639110	740420	0.95	1	0.87	0.97	0.79	0.91	17	18	15	Carbamidomethylation; TMT10plex	113967	E3 ubiquitin-protein ligase BRE1B OS=Mus musculus OX=10090 GN=Rnf40 PE=1 SV=2
987	10867	Q00PI9	16.73	237.71	597670	735030	609640	604800	839090	620150	0.81	1	0.83	0.82	1.14	0.84	597670	735030	609640	604800	839090	620150	0.81	1	0.83	0.82	1.14	0.84	22	16	16	Carbamidomethylation; TMT10plex	84940	Heterogeneous nuclear ribonucleoprotein U-like protein 2 OS=Mus musculus OX=10090 GN=Hnrnpul2 PE=1 SV=2
680	2099	Q9WTP6	3.78	237.66	2768300	3031300	2775900	2895600	2709800	2947100	0.91	1	0.92	0.96	0.89	0.97	2768300	3031300	2775900	2895600	2709800	2947100	0.91	1	0.92	0.96	0.89	0.97	46	9	9	Carbamidomethylation; TMT10plex	26469	Adenylate kinase 2 mitochondrial OS=Mus musculus OX=10090 GN=Ak2 PE=1 SV=5
915	5096	Q9CZ44	14.58	237.6	286890	302820	340660	416910	304580	312580	0.95	1	1.12	1.38	1.01	1.03	286890	302820	340660	416910	304580	312580	0.95	1	1.12	1.38	1.01	1.03	37	10	10	TMT10plex	40710	NSFL1 cofactor p47 OS=Mus musculus OX=10090 GN=Nsfl1c PE=1 SV=1
1065	7410	Q8VCW8	11.25	237.38	1445400	1387800	1561400	1389500	1294800	1219900	1.04	1	1.13	1	0.93	0.88	1445400	1387800	1561400	1389500	1294800	1219900	1.04	1	1.13	1	0.93	0.88	22	13	13	Carbamidomethylation; TMT10plex	67951	Medium-chain acyl-CoA ligase ACSF2 mitochondrial OS=Mus musculus OX=10090 GN=Acsf2 PE=1 SV=1
1381	4057	Q80Y81	4.9	237.35	392340	418540	382350	388930	438440	352420	0.94	1	0.91	0.93	1.05	0.84	392340	418540	382350	388930	438440	352420	0.94	1	0.91	0.93	1.05	0.84	20	12	12	Carbamidomethylation; TMT10plex	92719	Zinc phosphodiesterase ELAC protein 2 OS=Mus musculus OX=10090 GN=Elac2 PE=1 SV=1
1138	792	Q8C0D5	11.95	237.26	2204600	2189200	2340100	2122100	1809700	2223400	1.01	1	1.07	0.97	0.83	1.02	2204600	2189200	2340100	2122100	1809700	2223400	1.01	1	1.07	0.97	0.83	1.02	16	14	14	Carbamidomethylation; TMT10plex	125777	Elongation factor-like GTPase 1 OS=Mus musculus OX=10090 GN=Efl1 PE=1 SV=1
1354	3249	Q8K2T8	18.67	237.25	391630	435740	401670	401790	309450	360480	0.9	1	0.92	0.92	0.71	0.83	391630	435740	401670	401790	309450	360480	0.9	1	0.92	0.92	0.71	0.83	22	10	10	Carbamidomethylation; TMT10plex	60518	RNA polymerase II-associated factor 1 homolog OS=Mus musculus OX=10090 GN=Paf1 PE=1 SV=1
1221	7736	Q8VD75	11.53	237.25	405660	425230	381180	427560	330860	428560	0.95	1	0.9	1.01	0.78	1.01	405660	425230	381180	427560	330860	428560	0.95	1	0.9	1.01	0.78	1.01	16	13	13	Carbamidomethylation; TMT10plex	115202	Huntingtin-interacting protein 1 OS=Mus musculus OX=10090 GN=Hip1 PE=1 SV=2
1362	2020	Q5SSL4	3.46	237.25	1100100	1112300	990290	1118200	1056400	1068600	0.99	1	0.89	1.01	0.95	0.96	1100100	1112300	990290	1118200	1056400	1068600	0.99	1	0.89	1.01	0.95	0.96	13	12	10	Carbamidomethylation; TMT10plex	97667	Active breakpoint cluster region-related protein OS=Mus musculus OX=10090 GN=Abr PE=1 SV=1
545	164	Q9QUI0	18.77	236.88	550510	602140	462790	429530	544260	652340	0.91	1	0.77	0.71	0.9	1.08	550510	602140	462790	429530	544260	652340	0.91	1	0.77	0.71	0.9	1.08	18	10	3	Carbamidomethylation; TMT10plex; Oxidation (M)	21782	Transforming protein RhoA OS=Mus musculus OX=10090 GN=Rhoa PE=1 SV=1
839	539	O70435	14.16	236.56	9297500	8331900	11051000	11103000	9642500	9727800	1.12	1	1.33	1.33	1.16	1.17	9297500	8331900	11051000	11103000	9642500	9727800	1.12	1	1.33	1.33	1.16	1.17	44	13	13	Carbamidomethylation; TMT10plex; Oxidation (M)	28405	Proteasome subunit alpha type-3 OS=Mus musculus OX=10090 GN=Psma3 PE=1 SV=3
1211	15713	Q9CQR6	10.63	236.46	3606800	4266000	3304400	3486600	4037600	3483100	0.85	1	0.77	0.82	0.95	0.82	3606800	4266000	3304400	3486600	4037600	3483100	0.85	1	0.77	0.82	0.95	0.82	47	12	12	Carbamidomethylation; TMT10plex	35159	Serine/threonine-protein phosphatase 6 catalytic subunit OS=Mus musculus OX=10090 GN=Ppp6c PE=1 SV=1
843	6635	Q5SVL6	8.58	236.46	1327100	1507700	1344600	1516400	1447800	1651200	0.88	1	0.89	1.01	0.96	1.1	1327100	1507700	1344600	1516400	1447800	1651200	0.88	1	0.89	1.01	0.96	1.1	26	15	14	Carbamidomethylation; TMT10plex	78254	Rap1 GTPase-activating protein 2 OS=Mus musculus OX=10090 GN=Rap1gap2 PE=1 SV=1
1559	14403	O35226	13.49	236.3	1362500	1360000	1436500	1628900	1635300	1897400	1	1	1.06	1.2	1.2	1.4	1362500	1360000	1436500	1628900	1635300	1897400	1	1	1.06	1.2	1.2	1.4	32	9	9	Carbamidomethylation; TMT10plex	40704	26S proteasome non-ATPase regulatory subunit 4 OS=Mus musculus OX=10090 GN=Psmd4 PE=1 SV=1
453	538	Q8BU30	7.29	236.24	2714100	2798500	2779500	2679600	3338100	3028400	0.97	1	0.99	0.96	1.19	1.08	2714100	2798500	2779500	2679600	3338100	3028400	0.97	1	0.99	0.96	1.19	1.08	20	24	24	Carbamidomethylation; TMT10plex	144270	Isoleucine--tRNA ligase cytoplasmic OS=Mus musculus OX=10090 GN=Iars1 PE=1 SV=2
682	1590	P09671	12.01	236.18	13519000	17496000	15091000	15176000	15562000	14571000	0.77	1	0.86	0.87	0.89	0.83	13519000	17496000	15091000	15176000	15562000	14571000	0.77	1	0.86	0.87	0.89	0.83	33	10	10	TMT10plex	24603	Superoxide dismutase [Mn] mitochondrial OS=Mus musculus OX=10090 GN=Sod2 PE=1 SV=3
1352	10556	Q8BH74	7.21	236.02	552810	651900	655950	681300	626740	653350	0.85	1	1.01	1.05	0.96	1	552810	651900	655950	681300	626740	653350	0.85	1	1.01	1.05	0.96	1	14	11	11	Carbamidomethylation; TMT10plex	106717	Nuclear pore complex protein Nup107 OS=Mus musculus OX=10090 GN=Nup107 PE=1 SV=1
978	3317	Q9D5V5	15.24	236.01	1744600	1860500	1794800	1721200	1376900	1759500	0.94	1	0.96	0.93	0.74	0.95	1744600	1860500	1794800	1721200	1376900	1759500	0.94	1	0.96	0.93	0.74	0.95	21	14	14	Carbamidomethylation; TMT10plex	90974	Cullin-5 OS=Mus musculus OX=10090 GN=Cul5 PE=1 SV=3
944	12829	Q9JMH6	7.38	235.99	1206500	1172400	1254700	998700	1044800	1246900	1.03	1	1.07	0.85	0.89	1.06	1206500	1172400	1254700	998700	1044800	1246900	1.03	1	1.07	0.85	0.89	1.06	25	14	13	Carbamidomethylation; TMT10plex	67084	Thioredoxin reductase 1 cytoplasmic OS=Mus musculus OX=10090 GN=Txnrd1 PE=1 SV=3
1253	15776	Q9CQM9	10.76	235.8	2491400	2040400	2611500	2444900	2355000	2937500	1.22	1	1.28	1.2	1.15	1.44	2491400	2040400	2611500	2444900	2355000	2937500	1.22	1	1.28	1.2	1.15	1.44	33	10	10	Carbamidomethylation; TMT10plex	37778	Glutaredoxin-3 OS=Mus musculus OX=10090 GN=Glrx3 PE=1 SV=1
1113	8687	Q61584	8.53	235.7	1214400	1107000	1229600	1104100	1002100	1080100	1.1	1	1.11	1	0.91	0.98	1214400	1107000	1229600	1104100	1002100	1080100	1.1	1	1.11	1	0.91	0.98	19	14	13	Carbamidomethylation; TMT10plex	76222	Fragile X mental retardation syndrome-related protein 1 OS=Mus musculus OX=10090 GN=Fxr1 PE=1 SV=2
934	858	Q8C0C7	7.19	235.59	2148300	2087600	1792800	2208600	1788300	1830100	1.03	1	0.86	1.06	0.86	0.88	2148300	2087600	1792800	2208600	1788300	1830100	1.03	1	0.86	1.06	0.86	0.88	22	11	11	Carbamidomethylation; TMT10plex	57599	Phenylalanine--tRNA ligase alpha subunit OS=Mus musculus OX=10090 GN=Farsa PE=1 SV=1
936	2881	P48774	7.73	235.55	2394900	2573600	2062600	2449700	2351000	2473400	0.93	1	0.8	0.95	0.91	0.96	2394900	2573600	2062600	2449700	2351000	2473400	0.93	1	0.8	0.95	0.91	0.96	48	13	12	Carbamidomethylation; TMT10plex	26635	Glutathione S-transferase Mu 5 OS=Mus musculus OX=10090 GN=Gstm5 PE=1 SV=1
1933	2779	Q6PB44	7.49	235.32	241250	218500	267200	218030	263380	228010	1.1	1	1.22	1	1.21	1.04	241250	218500	267200	218030	263380	228010	1.1	1	1.22	1	1.21	1.04	6	8	8	TMT10plex	185215	Tyrosine-protein phosphatase non-receptor type 23 OS=Mus musculus OX=10090 GN=Ptpn23 PE=1 SV=2
571	1794	Q99KV1	4.03	234.97	3517500	3709400	3317300	3408500	3296500	3517500	0.95	1	0.89	0.92	0.89	0.95	3517500	3709400	3317300	3408500	3296500	3517500	0.95	1	0.89	0.92	0.89	0.95	41	13	13	Carbamidomethylation; TMT10plex; Oxidation (M)	40555	DnaJ homolog subfamily B member 11 OS=Mus musculus OX=10090 GN=Dnajb11 PE=1 SV=1
906	5565	P28658	2.78	234.69	1509500	1679900	1575500	1604000	1570800	1566800	0.9	1	0.94	0.95	0.94	0.93	1509500	1679900	1575500	1604000	1570800	1566800	0.9	1	0.94	0.95	0.94	0.93	28	12	12	Carbamidomethylation; TMT10plex	53707	Ataxin-10 OS=Mus musculus OX=10090 GN=Atxn10 PE=1 SV=2
957	126	Q9DBR7	9.07	234.33	344470	324360	421110	360940	340220	363850	1.06	1	1.3	1.11	1.05	1.12	344470	324360	421110	360940	340220	363850	1.06	1	1.3	1.11	1.05	1.12	14	15	13	Carbamidomethylation; TMT10plex	114996	Protein phosphatase 1 regulatory subunit 12A OS=Mus musculus OX=10090 GN=Ppp1r12a PE=1 SV=2
1232	4914	Q8R5C5	14.92	234.31	41435	46713	36875	31680	13688	33075	0.89	1	0.79	0.68	0.29	0.71	41435	46713	36875	31680	13688	33075	0.89	1	0.79	0.68	0.29	0.71	7	9	2	TMT10plex	42281	Beta-centractin OS=Mus musculus OX=10090 GN=Actr1b PE=1 SV=1
754	3657	P99026	9.74	234.28	1597400	1386700	1621200	1717400	1325900	1295900	1.15	1	1.17	1.24	0.96	0.93	1597400	1386700	1621200	1717400	1325900	1295900	1.15	1	1.17	1.24	0.96	0.93	50	9	9	TMT10plex; Oxidation (M)	29116	Proteasome subunit beta type-4 OS=Mus musculus OX=10090 GN=Psmb4 PE=1 SV=1
776	3562	Q921F4	2.85	234.17	3720100	4100600	3765900	3893800	3743300	3793900	0.91	1	0.92	0.95	0.91	0.93	3720100	4100600	3765900	3893800	3743300	3793900	0.91	1	0.92	0.95	0.91	0.93	26	14	14	Carbamidomethylation; TMT10plex	64125	Heterogeneous nuclear ribonucleoprotein L-like OS=Mus musculus OX=10090 GN=Hnrnpll PE=1 SV=3
986	8998	Q8BT60	6.61	234.14	1174700	1195800	1160500	1147700	1008000	1221200	0.98	1	0.97	0.96	0.84	1.02	1174700	1195800	1160500	1147700	1008000	1221200	0.98	1	0.97	0.96	0.84	1.02	27	12	11	Carbamidomethylation; TMT10plex	59585	Copine-3 OS=Mus musculus OX=10090 GN=Cpne3 PE=1 SV=2
863	9466	Q9DBH5	32.51	234.08	3509300	3874900	3292100	3699500	5311400	3352700	0.91	1	0.85	0.95	1.37	0.87	3509300	3874900	3292100	3699500	5311400	3352700	0.91	1	0.85	0.95	1.37	0.87	35	14	14	Carbamidomethylation; TMT10plex	40430	Vesicular integral-membrane protein VIP36 OS=Mus musculus OX=10090 GN=Lman2 PE=1 SV=2
741	1263	Q8VEE4	2.49	233.93	2499200	2671900	2423500	2609000	2625000	2370700	0.94	1	0.91	0.98	0.98	0.89	2499200	2671900	2423500	2609000	2625000	2370700	0.94	1	0.91	0.98	0.98	0.89	28	17	17	Carbamidomethylation; TMT10plex	69037	Replication protein A 70 kDa DNA-binding subunit OS=Mus musculus OX=10090 GN=Rpa1 PE=1 SV=1
882	260	Q62159	5.51	233.89	3795.6	9522.6	12254	8283	3679	6443.9	0.4	1	1.29	0.87	0.39	0.68	3795.6	9522.6	12254	8283	3679	6443.9	0.4	1	1.29	0.87	0.39	0.68	6	8	1	Carbamidomethylation; TMT10plex	22006	Rho-related GTP-binding protein RhoC OS=Mus musculus OX=10090 GN=Rhoc PE=1 SV=2
695	897	P84084	26.44	233.84	807990	827100	865080	751960	566580	733570	0.98	1	1.05	0.91	0.69	0.89	807990	827100	865080	751960	566580	733570	0.98	1	1.05	0.91	0.69	0.89	28	11	6	TMT10plex; Oxidation (M)	20530	ADP-ribosylation factor 5 OS=Mus musculus OX=10090 GN=Arf5 PE=1 SV=2
1037	2294	Q8BP67	17.09	233.75	2170600	2294900	2033900	1747000	2811500	2099600	0.95	1	0.89	0.76	1.23	0.91	2170600	2294900	2033900	1747000	2811500	2099600	0.95	1	0.89	0.76	1.23	0.91	43	10	10	Carbamidomethylation; TMT10plex	17779	60S ribosomal protein L24 OS=Mus musculus OX=10090 GN=Rpl24 PE=1 SV=2
887	2807	Q6NZL0	6.57	233.74	965910	912260	854300	911960	908710	720700	1.06	1	0.94	1	1	0.79	965910	912260	854300	911960	908710	720700	1.06	1	0.94	1	1	0.79	15	16	14	TMT10plex	103480	Protein SOGA3 OS=Mus musculus OX=10090 GN=Soga3 PE=1 SV=2
990	1885	Q9D8L5	10.11	233.72	781340	796530	798140	803130	762800	1004400	0.98	1	1	1.01	0.96	1.26	781340	796530	798140	803130	762800	1004400	0.98	1	1	1.01	0.96	1.26	29	14	14	Carbamidomethylation; TMT10plex	50007	Coiled-coil domain-containing protein 91 OS=Mus musculus OX=10090 GN=Ccdc91 PE=1 SV=2
1022	4670	Q9CXT8	8.56	233.72	1679100	1679300	1491200	1692600	1367900	1448000	1	1	0.89	1.01	0.81	0.86	1679100	1679300	1491200	1692600	1367900	1448000	1	1	0.89	1.01	0.81	0.86	38	13	13	Carbamidomethylation; TMT10plex	54615	Mitochondrial-processing peptidase subunit beta OS=Mus musculus OX=10090 GN=Pmpcb PE=1 SV=1
926	11972	P62754	4.16	233.7	8596800	8709700	9180300	8135500	8621200	8272100	0.99	1	1.05	0.93	0.99	0.95	8596800	8709700	9180300	8135500	8621200	8272100	0.99	1	1.05	0.93	0.99	0.95	41	11	11	Carbamidomethylation; TMT10plex; Oxidation (M)	28681	40S ribosomal protein S6 OS=Mus musculus OX=10090 GN=Rps6 PE=1 SV=1
1864	15790	Q6PIU9	2.48	233.65	564530	583700	539740	533200	576310	582020	0.97	1	0.92	0.91	0.99	1	564530	583700	539740	533200	576310	582020	0.97	1	0.92	0.91	0.99	1	37	9	9	Carbamidomethylation; TMT10plex	37705	Uncharacterized protein FLJ45252 homolog OS=Mus musculus OX=10090 PE=1 SV=2
845	15772	P62748	12.8	233.55	460050	663670	474350	535320	647870	631360	0.69	1	0.71	0.81	0.98	0.95	460050	663670	474350	535320	647870	631360	0.69	1	0.71	0.81	0.98	0.95	23	12	4	TMT10plex	22338	Hippocalcin-like protein 1 OS=Mus musculus OX=10090 GN=Hpcal1 PE=1 SV=2
614	16019	P63028	12.08	233.55	19054000	14708000	18924000	18976000	17165000	19011000	1.3	1	1.29	1.29	1.17	1.29	19054000	14708000	18924000	18976000	17165000	19011000	1.3	1	1.29	1.29	1.17	1.29	38	8	8	Carbamidomethylation; TMT10plex; Oxidation (M)	19462	Translationally-controlled tumor protein OS=Mus musculus OX=10090 GN=Tpt1 PE=1 SV=1
387	2776	P12970	4.26	233.41	29240000	29825000	32778000	30307000	32276000	28982000	0.98	1	1.1	1.02	1.08	0.97	29240000	29825000	32778000	30307000	32276000	28982000	0.98	1	1.1	1.02	1.08	0.97	49	19	19	Carbamidomethylation; TMT10plex	29977	60S ribosomal protein L7a OS=Mus musculus OX=10090 GN=Rpl7a PE=1 SV=2
641	1002	Q8BMG7	1.31	233.39	2809100	2816700	2756300	2865900	2689500	2840800	1	1	0.98	1.02	0.95	1.01	2809100	2816700	2756300	2865900	2689500	2840800	1	1	0.98	1.02	0.95	1.01	17	20	20	Carbamidomethylation; TMT10plex	152534	Rab3 GTPase-activating protein non-catalytic subunit OS=Mus musculus OX=10090 GN=Rab3gap2 PE=1 SV=2
876	1052	Q7TQI3	5.63	233.25	1879700	2235600	2138700	2072700	2459400	2006900	0.84	1	0.96	0.93	1.1	0.9	1879700	2235600	2138700	2072700	2459400	2006900	0.84	1	0.96	0.93	1.1	0.9	43	12	12	Carbamidomethylation; TMT10plex	31270	Ubiquitin thioesterase OTUB1 OS=Mus musculus OX=10090 GN=Otub1 PE=1 SV=2
1094	13597	Q9WVA3	23.78	233.23	2406000	2325500	2632600	2585900	3459000	2675100	1.03	1	1.13	1.11	1.49	1.15	2406000	2325500	2632600	2585900	3459000	2675100	1.03	1	1.13	1.11	1.49	1.15	29	10	10	TMT10plex	36955	Mitotic checkpoint protein BUB3 OS=Mus musculus OX=10090 GN=Bub3 PE=1 SV=2
632	2995	Q9Z1T1	2.06	233.19	1542300	1529200	1550500	1512700	1447900	1608900	1.01	1	1.01	0.99	0.95	1.05	1542300	1529200	1550500	1512700	1447900	1608900	1.01	1	1.01	0.99	0.95	1.05	13	21	14	Carbamidomethylation; TMT10plex	122740	AP-3 complex subunit beta-1 OS=Mus musculus OX=10090 GN=Ap3b1 PE=1 SV=2
737	2305	Q9Z2Y8	7.43	232.8	6899500	7821400	6539600	6919000	6496200	7090500	0.88	1	0.84	0.88	0.83	0.91	6899500	7821400	6539600	6919000	6496200	7090500	0.88	1	0.84	0.88	0.83	0.91	49	12	12	Carbamidomethylation; TMT10plex	30049	Pyridoxal phosphate homeostasis protein OS=Mus musculus OX=10090 GN=Plpbp PE=1 SV=1
861	15257	O35350	9.45	232.79	910830	1014600	946750	965580	814700	831500	0.9	1	0.93	0.95	0.8	0.82	910830	1014600	946750	965580	814700	831500	0.9	1	0.93	0.95	0.8	0.82	25	16	16	Carbamidomethylation; TMT10plex	82106	Calpain-1 catalytic subunit OS=Mus musculus OX=10090 GN=Capn1 PE=1 SV=1
1098	1329	O54782	13.19	232.76	1376000	1415800	1652900	1334900	1862400	1463600	0.97	1	1.17	0.94	1.32	1.03	1376000	1415800	1652900	1334900	1862400	1463600	0.97	1	1.17	0.94	1.32	1.03	18	14	14	Carbamidomethylation; TMT10plex	115609	Epididymis-specific alpha-mannosidase OS=Mus musculus OX=10090 GN=Man2b2 PE=1 SV=2
965	523	Q62448	5.41	232.76	1869400	1922500	1789600	2150500	1659000	1686100	0.97	1	0.93	1.12	0.86	0.88	1869400	1922500	1789600	2150500	1659000	1686100	0.97	1	0.93	1.12	0.86	0.88	20	15	15	Carbamidomethylation; TMT10plex	102105	Eukaryotic translation initiation factor 4 gamma 2 OS=Mus musculus OX=10090 GN=Eif4g2 PE=1 SV=2
432	119	P27659	8.39	232.65	8168300	8626200	9688000	8506000	8165400	7914700	0.95	1	1.12	0.99	0.95	0.92	8168300	8626200	9688000	8506000	8165400	7914700	0.95	1	1.12	0.99	0.95	0.92	38	19	19	Carbamidomethylation; TMT10plex; Oxidation (M)	46110	60S ribosomal protein L3 OS=Mus musculus OX=10090 GN=Rpl3 PE=1 SV=3
785	5422	Q9D8S3	8.6	232.63	1876700	1807400	1704100	1950100	2044200	2093300	1.04	1	0.94	1.08	1.13	1.16	1876700	1807400	1704100	1950100	2044200	2093300	1.04	1	0.94	1.08	1.13	1.16	28	14	14	Carbamidomethylation; TMT10plex	57456	ADP-ribosylation factor GTPase-activating protein 3 OS=Mus musculus OX=10090 GN=Arfgap3 PE=1 SV=2
849	424	Q99KQ4	1.8	232.61	3757500	3551800	3564300	3634400	3358200	3557200	1.06	1	1	1.02	0.95	1	3757500	3551800	3564300	3634400	3358200	3557200	1.06	1	1	1.02	0.95	1	31	15	15	Carbamidomethylation; TMT10plex	55447	Nicotinamide phosphoribosyltransferase OS=Mus musculus OX=10090 GN=Nampt PE=1 SV=1
1027	1298	Q9DCS9	13.83	232.18	1511700	1458000	1397000	1438700	1250500	1052800	1.04	1	0.96	0.99	0.86	0.72	1511700	1458000	1397000	1438700	1250500	1052800	1.04	1	0.96	0.99	0.86	0.72	55	9	9	Carbamidomethylation; TMT10plex	21024	NADH dehydrogenase [ubiquinone] 1 beta subcomplex subunit 10 OS=Mus musculus OX=10090 GN=Ndufb10 PE=1 SV=3
644	1280	Q9CZC8	3.74	232.16	13189000	11923000	13327000	13125000	12371000	12828000	1.11	1	1.12	1.1	1.04	1.08	13189000	11923000	13327000	13125000	12371000	12828000	1.11	1	1.12	1.1	1.04	1.08	24	11	11	Carbamidomethylation; TMT10plex	46326	Secernin-1 OS=Mus musculus OX=10090 GN=Scrn1 PE=1 SV=1
867	1297	O35857	9.42	232.11	3208100	3263700	3357000	3061700	2985000	2696800	0.98	1	1.03	0.94	0.91	0.83	3208100	3263700	3357000	3061700	2985000	2696800	0.98	1	1.03	0.94	0.91	0.83	36	15	15	TMT10plex	51091	Mitochondrial import inner membrane translocase subunit TIM44 OS=Mus musculus OX=10090 GN=Timm44 PE=1 SV=2
879	16125	P99027	7.59	232.09	5447700	6158100	5406300	5488900	5100000	6463300	0.88	1	0.88	0.89	0.83	1.05	5447700	6158100	5406300	5488900	5100000	6463300	0.88	1	0.88	0.89	0.83	1.05	63	6	6	TMT10plex; Oxidation (M)	11651	60S acidic ribosomal protein P2 OS=Mus musculus OX=10090 GN=Rplp2 PE=1 SV=3
694	2198	P42230	2	232.05	505390	459900	546230	433040	409940	557240	1.1	1	1.19	0.94	0.89	1.21	505390	459900	546230	433040	409940	557240	1.1	1	1.19	0.94	0.89	1.21	2	15	2	TMT10plex	90831	Signal transducer and activator of transcription 5A OS=Mus musculus OX=10090 GN=Stat5a PE=1 SV=1
564	4259	O55023	3.3	231.96	4481200	4882800	4922800	4820000	4451100	4482700	0.92	1	1.01	0.99	0.91	0.92	4481200	4882800	4922800	4820000	4451100	4482700	0.92	1	1.01	0.99	0.91	0.92	47	13	13	Carbamidomethylation; TMT10plex	30436	Inositol monophosphatase 1 OS=Mus musculus OX=10090 GN=Impa1 PE=1 SV=1
459	653	Q64133	14.84	231.93	4728400	4809400	4764700	4701700	6405800	4990200	0.98	1	0.99	0.98	1.33	1.04	4728400	4809400	4764700	4701700	6405800	4990200	0.98	1	0.99	0.98	1.33	1.04	21	15	12	TMT10plex	59602	Amine oxidase [flavin-containing] A OS=Mus musculus OX=10090 GN=Maoa PE=1 SV=3
1520	9121	Q9JI10	12.49	231.82	498360	460530	527490	479480	399060	494860	1.08	1	1.15	1.04	0.87	1.07	498360	460530	527490	479480	399060	494860	1.08	1	1.15	1.04	0.87	1.07	14	10	6	TMT10plex	56855	Serine/threonine-protein kinase 3 OS=Mus musculus OX=10090 GN=Stk3 PE=1 SV=1
1277	3110	P35585	7.66	231.79	1518400	1691700	1367200	1468200	1552700	1427500	0.9	1	0.81	0.87	0.92	0.84	1518400	1691700	1367200	1468200	1552700	1427500	0.9	1	0.81	0.87	0.92	0.84	35	13	13	TMT10plex	48543	AP-1 complex subunit mu-1 OS=Mus musculus OX=10090 GN=Ap1m1 PE=1 SV=3
781	4183	P68181	36.04	231.62	435520	377100	305700	386390	508020	470520	1.15	1	0.81	1.02	1.35	1.25	435520	377100	305700	386390	508020	470520	1.15	1	0.81	1.02	1.35	1.25	25	11	6	TMT10plex	40708	cAMP-dependent protein kinase catalytic subunit beta OS=Mus musculus OX=10090 GN=Prkacb PE=1 SV=2
905	15736	P84075	5.25	231.61	112150	118170	127340	126160	152360	112540	0.95	1	1.08	1.07	1.29	0.95	112150	118170	127340	126160	152360	112540	0.95	1	1.08	1.07	1.29	0.95	24	12	3	Carbamidomethylation; TMT10plex	22427	Neuron-specific calcium-binding protein hippocalcin OS=Mus musculus OX=10090 GN=Hpca PE=1 SV=2
792	611	P97371	3.27	231.57	9194100	9592300	9551100	9599100	9778100	10392000	0.96	1	1	1	1.02	1.08	9194100	9592300	9551100	9599100	9778100	10392000	0.96	1	1	1	1.02	1.08	44	12	11	Carbamidomethylation; TMT10plex	28673	Proteasome activator complex subunit 1 OS=Mus musculus OX=10090 GN=Psme1 PE=1 SV=2
1185	7612	Q9ESN9	10.13	231.48	820950	831790	974180	752990	849160	773970	0.99	1	1.17	0.91	1.02	0.93	820950	831790	974180	752990	849160	773970	0.99	1	1.17	0.91	1.02	0.93	11	14	11	Carbamidomethylation; TMT10plex	147560	C-Jun-amino-terminal kinase-interacting protein 3 OS=Mus musculus OX=10090 GN=Mapk8ip3 PE=1 SV=1
1130	11857	Q7TNG5	7.7	231.43	933910	963090	910340	951740	796130	942770	0.97	1	0.95	0.99	0.83	0.98	933910	963090	910340	951740	796130	942770	0.97	1	0.95	0.99	0.83	0.98	24	12	12	Carbamidomethylation; TMT10plex	70734	Echinoderm microtubule-associated protein-like 2 OS=Mus musculus OX=10090 GN=Eml2 PE=1 SV=1
1364	1800	P61202	3.83	231.39	3466200	3751500	3382200	3620400	3788200	3592200	0.92	1	0.9	0.97	1.01	0.96	3466200	3751500	3382200	3620400	3788200	3592200	0.92	1	0.9	0.97	1.01	0.96	25	11	11	TMT10plex	51597	COP9 signalosome complex subunit 2 OS=Mus musculus OX=10090 GN=Cops2 PE=1 SV=1
678	2878	Q9QZQ1	3.31	231.34	2147600	1863900	2095600	1889500	2069400	1975600	1.15	1	1.12	1.01	1.11	1.06	2147600	1863900	2095600	1889500	2069400	1975600	1.15	1	1.12	1.01	1.11	1.06	14	19	19	Carbamidomethylation; TMT10plex	206497	Afadin OS=Mus musculus OX=10090 GN=Afdn PE=1 SV=3
518	66	Q61335	13.84	231.26	35911000	31505000	36761000	34235000	27702000	33642000	1.14	1	1.17	1.09	0.88	1.07	35911000	31505000	36761000	34235000	27702000	33642000	1.14	1	1.17	1.09	0.88	1.07	39	15	15	TMT10plex; Oxidation (M)	27957	B-cell receptor-associated protein 31 OS=Mus musculus OX=10090 GN=Bcap31 PE=1 SV=4
932	524	Q9Z247	4.15	231.24	1859300	1766000	1820900	1671600	1695900	1613900	1.05	1	1.03	0.95	0.96	0.91	1859300	1766000	1820900	1671600	1695900	1613900	1.05	1	1.03	0.95	0.96	0.91	20	12	12	Carbamidomethylation; TMT10plex	62996	Peptidyl-prolyl cis-trans isomerase FKBP9 OS=Mus musculus OX=10090 GN=Fkbp9 PE=1 SV=1
1580	15959	Q8JZV7	30.95	231.21	566220	496420	676650	513670	456260	425170	1.14	1	1.36	1.03	0.92	0.86	566220	496420	676650	513670	456260	425170	1.14	1	1.36	1.03	0.92	0.86	18	6	6	Carbamidomethylation; TMT10plex	43501	N-acetylglucosamine-6-phosphate deacetylase OS=Mus musculus OX=10090 GN=Amdhd2 PE=1 SV=1
1169	10373	P59325	14.03	231.14	1974400	1974100	1845700	1810500	1483900	1821700	1	1	0.93	0.92	0.75	0.92	1974400	1974100	1845700	1810500	1483900	1821700	1	1	0.93	0.92	0.75	0.92	33	13	13	Carbamidomethylation; TMT10plex	48968	Eukaryotic translation initiation factor 5 OS=Mus musculus OX=10090 GN=Eif5 PE=1 SV=1
1241	9008	Q8JZR0	16.89	231.12	1023700	1015300	969600	964670	736220	745390	1.01	1	0.96	0.95	0.73	0.73	1023700	1015300	969600	964670	736220	745390	1.01	1	0.96	0.95	0.73	0.73	18	12	10	Carbamidomethylation; TMT10plex	76206	Long-chain-fatty-acid--CoA ligase 5 OS=Mus musculus OX=10090 GN=Acsl5 PE=1 SV=1
1285	3782	Q8VCM8	24.68	231.12	2157900	2176400	1824400	2106700	2738200	1793600	0.99	1	0.84	0.97	1.26	0.82	2157900	2176400	1824400	2106700	2738200	1793600	0.99	1	0.84	0.97	1.26	0.82	18	10	10	TMT10plex	62908	Nicalin OS=Mus musculus OX=10090 GN=Ncln PE=1 SV=2
1510	3093	Q8CCF0	14.18	230.96	901960	925630	826710	869240	694410	784260	0.97	1	0.89	0.94	0.75	0.85	901960	925630	826710	869240	694410	784260	0.97	1	0.89	0.94	0.75	0.85	20	10	10	Carbamidomethylation; TMT10plex	55430	U4/U6 small nuclear ribonucleoprotein Prp31 OS=Mus musculus OX=10090 GN=Prpf31 PE=1 SV=3
973	4703	Q9WVK4	5.55	230.92	1310200	1169300	1159400	1095900	1043600	1060700	1.12	1	0.99	0.94	0.89	0.91	1310200	1169300	1159400	1095900	1043600	1060700	1.12	1	0.99	0.94	0.89	0.91	15	14	8	TMT10plex	60603	EH domain-containing protein 1 OS=Mus musculus OX=10090 GN=Ehd1 PE=1 SV=1
1344	8713	Q9D1P4	11.78	230.89	2761700	2366900	2844200	2308600	2205000	2233500	1.17	1	1.2	0.98	0.93	0.94	2761700	2366900	2844200	2308600	2205000	2233500	1.17	1	1.2	0.98	0.93	0.94	31	8	8	Carbamidomethylation; TMT10plex	37351	Cysteine and histidine-rich domain-containing protein 1 OS=Mus musculus OX=10090 GN=Chordc1 PE=1 SV=1
854	9935	Q9Z1Z2	8.21	230.76	1906900	2010900	2003300	1704000	2444800	1863800	0.95	1	1	0.85	1.22	0.93	1906900	2010900	2003300	1704000	2444800	1863800	0.95	1	1	0.85	1.22	0.93	44	13	13	Carbamidomethylation; TMT10plex	38442	Serine-threonine kinase receptor-associated protein OS=Mus musculus OX=10090 GN=Strap PE=1 SV=2
1156	1500	Q9D7B6	11.75	230.74	1417500	1520400	1450500	1725000	1870100	1741000	0.93	1	0.95	1.13	1.23	1.15	1417500	1520400	1450500	1725000	1870100	1741000	0.93	1	0.95	1.13	1.23	1.15	30	11	11	Carbamidomethylation; TMT10plex	45020	Isobutyryl-CoA dehydrogenase mitochondrial OS=Mus musculus OX=10090 GN=Acad8 PE=1 SV=2
1068	7851	P57759	10.59	230.72	2749100	2714600	2608000	2584300	2141500	2954200	1.01	1	0.96	0.95	0.79	1.09	2749100	2714600	2608000	2584300	2141500	2954200	1.01	1	0.96	0.95	0.79	1.09	45	10	10	TMT10plex	28823	Endoplasmic reticulum resident protein 29 OS=Mus musculus OX=10090 GN=Erp29 PE=1 SV=2
1016	2847	Q9D554	5.04	230.58	2422100	2365900	2447900	2514700	2128600	2355600	1.02	1	1.03	1.06	0.9	1	2422100	2365900	2447900	2514700	2128600	2355600	1.02	1	1.03	1.06	0.9	1	35	15	15	Carbamidomethylation; TMT10plex	58842	Splicing factor 3A subunit 3 OS=Mus musculus OX=10090 GN=Sf3a3 PE=1 SV=2
784	1999	P45952	11.58	230.25	3348500	3041900	3446000	3583800	2679200	3182400	1.1	1	1.13	1.18	0.88	1.05	3348500	3041900	3446000	3583800	2679200	3182400	1.1	1	1.13	1.18	0.88	1.05	38	14	14	Carbamidomethylation; TMT10plex	46481	Medium-chain specific acyl-CoA dehydrogenase mitochondrial OS=Mus musculus OX=10090 GN=Acadm PE=1 SV=1
1922	11089	P50171	21.85	230.24	342450	327690	320470	336170	224740	269500	1.05	1	0.98	1.03	0.69	0.82	342450	327690	320470	336170	224740	269500	1.05	1	0.98	1.03	0.69	0.82	38	7	7	Carbamidomethylation; TMT10plex	26588	Estradiol 17-beta-dehydrogenase 8 OS=Mus musculus OX=10090 GN=Hsd17b8 PE=1 SV=2
779	2399	Q9QYE6	2.92	230.08	1132600	1076300	1105500	1215200	1071000	1122600	1.05	1	1.03	1.13	1	1.04	1132600	1076300	1105500	1215200	1071000	1122600	1.05	1	1.03	1.13	1	1.04	28	17	17	TMT10plex	82368	Golgin subfamily A member 5 OS=Mus musculus OX=10090 GN=Golga5 PE=1 SV=2
1225	4608	Q91YJ2	6.02	229.91	892860	818260	955580	824220	814590	849020	1.09	1	1.17	1.01	1	1.04	892860	818260	955580	824220	814590	849020	1.09	1	1.17	1.01	1	1.04	27	12	12	TMT10plex	51778	Sorting nexin-4 OS=Mus musculus OX=10090 GN=Snx4 PE=1 SV=1
1301	5832	P03958	25.53	229.88	682180	652030	761890	591650	503390	563380	1.05	1	1.17	0.91	0.77	0.86	682180	652030	761890	591650	503390	563380	1.05	1	1.17	0.91	0.77	0.86	37	11	11	Carbamidomethylation; TMT10plex	39992	Adenosine deaminase OS=Mus musculus OX=10090 GN=Ada PE=1 SV=3
1286	15834	P57784	7.43	229.69	931350	940650	980280	930510	814220	913140	0.99	1	1.04	0.99	0.87	0.97	931350	940650	980280	930510	814220	913140	0.99	1	1.04	0.99	0.87	0.97	34	9	9	TMT10plex	28357	U2 small nuclear ribonucleoprotein A' OS=Mus musculus OX=10090 GN=Snrpa1 PE=1 SV=2
1486	6675	Q80X82	9.63	229.64	911990	970590	917940	766310	891850	789290	0.94	1	0.95	0.79	0.92	0.81	911990	970590	917940	766310	891850	789290	0.94	1	0.95	0.79	0.92	0.81	11	10	10	Carbamidomethylation; TMT10plex	142620	Symplekin OS=Mus musculus OX=10090 GN=Sympk PE=1 SV=2
611	4064	Q9QWR8	55.22	229.53	7104100	6378300	6841900	6447200	12187000	7098100	1.11	1	1.07	1.01	1.91	1.11	7104100	6378300	6841900	6447200	12187000	7098100	1.11	1	1.07	1.01	1.91	1.11	37	16	16	Carbamidomethylation; TMT10plex; Oxidation (M)	47235	Alpha-N-acetylgalactosaminidase OS=Mus musculus OX=10090 GN=Naga PE=1 SV=2
1556	15802	P61021	4.83	229.51	919260	938680	849620	821080	819840	751410	0.98	1	0.91	0.87	0.87	0.8	919260	938680	849620	821080	819840	751410	0.98	1	0.91	0.87	0.87	0.8	39	8	5	TMT10plex	23707	Ras-related protein Rab-5B OS=Mus musculus OX=10090 GN=Rab5b PE=1 SV=1
938	4485	Q9CRC8	9.63	229.47	1613400	1876100	1744800	1769600	1502200	1668700	0.86	1	0.93	0.94	0.8	0.89	1613400	1876100	1744800	1769600	1502200	1668700	0.86	1	0.93	0.94	0.8	0.89	29	15	15	Carbamidomethylation; TMT10plex	68076	Leucine-rich repeat-containing protein 40 OS=Mus musculus OX=10090 GN=Lrrc40 PE=1 SV=2
1274	11723	P26516	11.48	229.42	4498500	5318900	4208600	4344600	5405700	5039900	0.85	1	0.79	0.82	1.02	0.95	4498500	5318900	4208600	4344600	5405700	5039900	0.85	1	0.79	0.82	1.02	0.95	46	11	11	Carbamidomethylation; TMT10plex	36540	26S proteasome non-ATPase regulatory subunit 7 OS=Mus musculus OX=10090 GN=Psmd7 PE=1 SV=2
1001	3888	Q8R127	48.42	229.38	892900	803080	796360	710220	1453100	697480	1.11	1	0.99	0.88	1.81	0.87	892900	803080	796360	710220	1453100	697480	1.11	1	0.99	0.88	1.81	0.87	26	9	9	Carbamidomethylation; TMT10plex	47129	Saccharopine dehydrogenase-like oxidoreductase OS=Mus musculus OX=10090 GN=Sccpdh PE=1 SV=1
1271	9379	Q9QZD9	4.42	229.34	7301800	7791200	7066600	7018000	7348000	6465800	0.94	1	0.91	0.9	0.94	0.83	7301800	7791200	7066600	7018000	7348000	6465800	0.94	1	0.91	0.9	0.94	0.83	37	11	11	Carbamidomethylation; TMT10plex	36461	Eukaryotic translation initiation factor 3 subunit I OS=Mus musculus OX=10090 GN=Eif3i PE=1 SV=1
1062	8569	P46935	9.56	229.31	1289600	1261700	1345300	1416400	1078400	1131100	1.02	1	1.07	1.12	0.85	0.9	1289600	1261700	1345300	1416400	1078400	1131100	1.02	1	1.07	1.12	0.85	0.9	18	14	13	TMT10plex	102706	E3 ubiquitin-protein ligase NEDD4 OS=Mus musculus OX=10090 GN=Nedd4 PE=1 SV=3
1196	3315	Q8CBY8	8.38	229.29	944160	1127400	1111700	869090	942010	963310	0.84	1	0.99	0.77	0.84	0.85	944160	1127400	1111700	869090	942010	963310	0.84	1	0.99	0.77	0.84	0.85	31	12	12	Carbamidomethylation; TMT10plex	53057	Dynactin subunit 4 OS=Mus musculus OX=10090 GN=Dctn4 PE=1 SV=1
484	747	Q9DCN2	3.97	229.22	6294200	6921300	6401500	6504500	7193500	6076500	0.91	1	0.92	0.94	1.04	0.88	6294100	6921300	6401500	6504500	7193500	6076500	0.91	1	0.92	0.94	1.04	0.88	38	11	11	TMT10plex; Oxidation (M)	34128	NADH-cytochrome b5 reductase 3 OS=Mus musculus OX=10090 GN=Cyb5r3 PE=1 SV=3
1071	11303	Q9WVE8	4.44	229.17	1106900	1119400	1047200	1232500	1034300	1025900	0.99	1	0.94	1.1	0.92	0.92	1106900	1119400	1047200	1232500	1034300	1025900	0.99	1	0.94	1.1	0.92	0.92	28	13	12	Carbamidomethylation; TMT10plex	55833	Protein kinase C and casein kinase substrate in neurons protein 2 OS=Mus musculus OX=10090 GN=Pacsin2 PE=1 SV=1
1200	15764	P23591	99.66	229.15	1935900	1067100	2119100	1416300	3103700	8873900	1.81	1	1.99	1.33	2.91	8.32	1935900	1067100	2119100	1416300	3103700	8873900	1.81	1	1.99	1.33	2.91	8.32	30	9	9	Carbamidomethylation; TMT10plex	35878	GDP-L-fucose synthase OS=Mus musculus OX=10090 GN=Tsta3 PE=1 SV=3
889	752	E9Q7G0	4.65	229.07	637470	672750	645430	615110	589780	608140	0.95	1	0.96	0.91	0.88	0.9	637470	672750	645430	615110	589780	608140	0.95	1	0.96	0.91	0.88	0.9	9	16	16	TMT10plex	235628	Nuclear mitotic apparatus protein 1 OS=Mus musculus OX=10090 GN=Numa1 PE=1 SV=1
1323	15722	P32233	16.61	228.99	425230	414540	468320	391160	396710	340730	1.03	1	1.13	0.94	0.96	0.82	425230	414540	468320	391160	396710	340730	1.03	1	1.13	0.94	0.96	0.82	38	12	11	Carbamidomethylation; TMT10plex	40512	Developmentally-regulated GTP-binding protein 1 OS=Mus musculus OX=10090 GN=Drg1 PE=1 SV=1
1558	15828	Q922W5	22.21	228.97	508320	647780	391060	548200	529110	572320	0.78	1	0.6	0.85	0.82	0.88	508320	647780	391060	548200	529110	572320	0.78	1	0.6	0.85	0.82	0.88	24	9	6	TMT10plex	32373	Pyrroline-5-carboxylate reductase 1 mitochondrial OS=Mus musculus OX=10090 GN=Pycr1 PE=1 SV=1
1650	1598	Q8CG76	4.66	228.87	1604800	1554600	1423800	1573900	1555200	1624600	1.03	1	0.92	1.01	1	1.05	1604800	1554600	1423800	1573900	1555200	1624600	1.03	1	0.92	1.01	1	1.05	26	9	9	Carbamidomethylation; TMT10plex	40612	Aflatoxin B1 aldehyde reductase member 2 OS=Mus musculus OX=10090 GN=Akr7a2 PE=1 SV=3
1171	7214	Q9R069	12.43	228.85	307790	350810	338440	248200	319730	282660	0.88	1	0.96	0.71	0.91	0.81	307790	350810	338440	248200	319730	282660	0.88	1	0.96	0.71	0.91	0.81	22	10	10	Carbamidomethylation; TMT10plex	67670	Basal cell adhesion molecule OS=Mus musculus OX=10090 GN=Bcam PE=1 SV=1
994	4070	Q8QZS1	4.9	228.83	2609000	2613100	2595000	2566400	2278400	2447400	1	1	0.99	0.98	0.87	0.94	2609000	2613100	2595000	2566400	2278400	2447400	1	1	0.99	0.98	0.87	0.94	42	15	15	Carbamidomethylation; TMT10plex	43038	3-hydroxyisobutyryl-CoA hydrolase mitochondrial OS=Mus musculus OX=10090 GN=Hibch PE=1 SV=1
498	1451	Q68FL6	4.29	228.76	3486600	3402300	3103400	3374800	3512300	3019700	1.02	1	0.91	0.99	1.03	0.89	3486600	3402300	3103400	3374800	3512300	3019700	1.02	1	0.91	0.99	1.03	0.89	29	24	24	Carbamidomethylation; TMT10plex	101431	Methionine--tRNA ligase cytoplasmic OS=Mus musculus OX=10090 GN=Mars1 PE=1 SV=1
1355	13793	Q9Z204	16.56	228.72	1933500	1898000	2241300	1559600	2046400	1923000	1.02	1	1.18	0.82	1.08	1.01	1933500	1898000	2241300	1559600	2046400	1923000	1.02	1	1.18	0.82	1.08	1.01	31	10	10	TMT10plex	34385	Heterogeneous nuclear ribonucleoproteins C1/C2 OS=Mus musculus OX=10090 GN=Hnrnpc PE=1 SV=1
762	2766	Q8BUV3	2.57	228.67	1919400	1917500	1935300	1882600	1782300	2031400	1	1	1.01	0.98	0.93	1.06	1919400	1917500	1935300	1882600	1782300	2031400	1	1	1.01	0.98	0.93	1.06	24	14	14	Carbamidomethylation; TMT10plex	83282	Gephyrin OS=Mus musculus OX=10090 GN=Gphn PE=1 SV=2
817	4928	P62874	7.72	228.46	970590	1042100	1023400	929100	986140	845610	0.93	1	0.98	0.89	0.95	0.81	970590	1042100	1023400	929100	986140	845610	0.93	1	0.98	0.89	0.95	0.81	28	12	7	Carbamidomethylation; TMT10plex	37377	Guanine nucleotide-binding protein G(I)/G(S)/G(T) subunit beta-1 OS=Mus musculus OX=10090 GN=Gnb1 PE=1 SV=3
1032	11484	Q9CXW3	8.43	228.3	2560300	2414200	2303200	2469400	2221400	2821000	1.06	1	0.95	1.02	0.92	1.17	2560300	2414200	2303200	2469400	2221400	2821000	1.06	1	0.95	1.02	0.92	1.17	59	15	15	Carbamidomethylation; TMT10plex	26510	Calcyclin-binding protein OS=Mus musculus OX=10090 GN=Cacybp PE=1 SV=1
1570	2938	Q8BH24	8.59	228.2	1300700	1610000	1449300	1367300	1310900	1366100	0.81	1	0.9	0.85	0.81	0.85	1300700	1610000	1449300	1367300	1310900	1366100	0.81	1	0.9	0.85	0.81	0.85	19	11	11	Carbamidomethylation; TMT10plex	74693	Transmembrane 9 superfamily member 4 OS=Mus musculus OX=10090 GN=Tm9sf4 PE=1 SV=1
1429	11308	O88487	5.57	228.17	800390	798920	761520	697590	687160	691780	1	1	0.95	0.87	0.86	0.87	800390	798920	761520	697590	687160	691780	1	1	0.95	0.87	0.86	0.87	20	9	9	Carbamidomethylation; TMT10plex	68394	Cytoplasmic dynein 1 intermediate chain 2 OS=Mus musculus OX=10090 GN=Dync1i2 PE=1 SV=1
819	15766	Q9DCH4	2.54	227.8	2507600	2688200	2467400	2544400	2570800	2496800	0.93	1	0.92	0.95	0.96	0.93	2507600	2688200	2467400	2544400	2570800	2496800	0.93	1	0.92	0.95	0.96	0.93	28	9	9	TMT10plex	37984	Eukaryotic translation initiation factor 3 subunit F OS=Mus musculus OX=10090 GN=Eif3f PE=1 SV=2
512	2415	P20060	5.26	227.79	4569600	4884300	4465600	4304200	4227600	3906500	0.94	1	0.91	0.88	0.87	0.8	4569600	4884300	4465600	4304200	4227600	3906500	0.94	1	0.91	0.88	0.87	0.8	24	14	14	Carbamidomethylation; TMT10plex	61116	Beta-hexosaminidase subunit beta OS=Mus musculus OX=10090 GN=Hexb PE=1 SV=2
1278	15714	Q9CZ42	16.57	227.71	1940600	2129000	2111600	2752100	2121800	1699700	0.91	1	0.99	1.29	1	0.8	1940600	2129000	2111600	2752100	2121800	1699700	0.91	1	0.99	1.29	1	0.8	43	13	13	Carbamidomethylation; TMT10plex	36717	ATP-dependent (S)-NAD(P)H-hydrate dehydratase OS=Mus musculus OX=10090 GN=Naxd PE=1 SV=1
1474	2503	Q9JHS4	7.04	227.65	927130	911400	888470	817270	762310	842340	1.02	1	0.97	0.9	0.84	0.92	927130	911400	888470	817270	762310	842340	1.02	1	0.97	0.9	0.84	0.92	23	11	11	TMT10plex	69229	ATP-dependent Clp protease ATP-binding subunit clpX-like mitochondrial OS=Mus musculus OX=10090 GN=Clpx PE=1 SV=2
350	12623	P19157	20.86	227.52	6389500	5697500	6657800	5860200	5340900	4615000	1.12	1	1.17	1.03	0.94	0.81	6389500	5697500	6657800	5860200	5340900	4615000	1.12	1	1.17	1.03	0.94	0.81	48	8	8	TMT10plex; Oxidation (M)	23609	Glutathione S-transferase P 1 OS=Mus musculus OX=10090 GN=Gstp1 PE=1 SV=2
830	11035	Q8BX90	5.83	227.44	666420	717830	683920	665510	614220	668430	0.93	1	0.95	0.93	0.86	0.93	666420	717830	683920	665510	614220	668430	0.93	1	0.95	0.93	0.86	0.93	19	16	16	Carbamidomethylation; TMT10plex	131958	Fibronectin type-III domain-containing protein 3A OS=Mus musculus OX=10090 GN=Fndc3a PE=1 SV=3
206	534	Q93092	5.01	227.41	16362000	15363000	15821000	17899000	14732000	15349000	1.06	1	1.03	1.17	0.96	1	16362000	15363000	15821000	17899000	14732000	15349000	1.06	1	1.03	1.17	0.96	1	49	22	22	Carbamidomethylation; TMT10plex; Oxidation (M)	37387	Transaldolase OS=Mus musculus OX=10090 GN=Taldo1 PE=1 SV=2
925	1066	P35279	18.31	227.29	1071000	1157200	1033200	1141200	825250	907280	0.93	1	0.89	0.99	0.71	0.78	1071000	1157200	1033200	1141200	825250	907280	0.93	1	0.89	0.99	0.71	0.78	46	9	8	TMT10plex	23590	Ras-related protein Rab-6A OS=Mus musculus OX=10090 GN=Rab6a PE=1 SV=4
1137	2016	P56695	4.47	227.22	1109200	1230200	1063400	1245800	1105200	1170700	0.9	1	0.86	1.01	0.9	0.95	1109200	1230200	1063400	1245800	1105200	1170700	0.9	1	0.86	1.01	0.9	0.95	11	11	11	TMT10plex	100579	Wolframin OS=Mus musculus OX=10090 GN=Wfs1 PE=1 SV=1
1254	10442	Q9CQJ6	14.06	227.13	951770	960840	1145400	1284600	1124200	1386500	0.99	1	1.19	1.34	1.17	1.44	951770	960840	1145400	1284600	1124200	1386500	0.99	1	1.19	1.34	1.17	1.44	43	7	7	Carbamidomethylation; TMT10plex; Oxidation (M)	22166	Density-regulated protein OS=Mus musculus OX=10090 GN=Denr PE=1 SV=1
697	14150	Q9JLB0	8.48	227.13	1702800	1958800	1795300	1737000	1597800	1754800	0.87	1	0.92	0.89	0.82	0.9	1702800	1958800	1795300	1737000	1597800	1754800	0.87	1	0.92	0.89	0.82	0.9	36	20	18	Carbamidomethylation; TMT10plex	62631	MAGUK p55 subfamily member 6 OS=Mus musculus OX=10090 GN=Mpp6 PE=1 SV=1
766	1633	Q9WTX6	6.29	227.12	1411700	1451200	1455500	1572100	1575600	1716000	0.97	1	1	1.08	1.09	1.18	1411700	1451200	1455500	1572100	1575600	1716000	0.97	1	1	1.08	1.09	1.18	22	17	17	Carbamidomethylation; TMT10plex	89691	Cullin-1 OS=Mus musculus OX=10090 GN=Cul1 PE=1 SV=1
832	1499	Q6NZC7	8.02	227.08	3079200	2885700	2802900	3135800	2751300	3409400	1.07	1	0.97	1.09	0.95	1.18	3079200	2885700	2802900	3135800	2751300	3409400	1.07	1	0.97	1.09	0.95	1.18	15	15	15	Carbamidomethylation; TMT10plex	110780	SEC23-interacting protein OS=Mus musculus OX=10090 GN=Sec23ip PE=1 SV=2
988	15721	Q9D6Z1	9.04	226.89	999110	1198900	1231000	1288400	1091200	1120500	0.83	1	1.03	1.07	0.91	0.93	999110	1198900	1231000	1288400	1091200	1120500	0.83	1	1.03	1.07	0.91	0.93	26	14	14	Carbamidomethylation; TMT10plex	64464	Nucleolar protein 56 OS=Mus musculus OX=10090 GN=Nop56 PE=1 SV=2
1228	2964	Q8C4Y3	13.74	226.63	345390	308220	342020	369110	284570	258080	1.12	1	1.11	1.2	0.92	0.84	345390	308220	342020	369110	284570	258080	1.12	1	1.11	1.2	0.92	0.84	18	10	10	TMT10plex	65636	Negative elongation factor B OS=Mus musculus OX=10090 GN=Nelfb PE=1 SV=2
723	3099	O09159	11.25	226.61	3741300	4164100	3783700	3488800	5022000	3709800	0.9	1	0.91	0.84	1.21	0.89	3741300	4164100	3783700	3488800	5022000	3709800	0.9	1	0.91	0.84	1.21	0.89	23	18	18	Carbamidomethylation; TMT10plex	114648	Lysosomal alpha-mannosidase OS=Mus musculus OX=10090 GN=Man2b1 PE=1 SV=4
1544	15830	Q6NVF9	3.09	226.57	1708100	1685800	1715200	1726900	1733200	1887500	1.01	1	1.02	1.02	1.03	1.12	1708100	1685800	1715200	1726900	1733200	1887500	1.01	1	1.02	1.02	1.03	1.12	18	10	10	Carbamidomethylation; TMT10plex	59153	Cleavage and polyadenylation specificity factor subunit 6 OS=Mus musculus OX=10090 GN=Cpsf6 PE=1 SV=1
1067	5208	P06801	9.39	226.49	1853300	1878100	1990500	1705700	1711500	1599800	0.99	1	1.06	0.91	0.91	0.85	1853300	1878100	1990500	1705700	1711500	1599800	0.99	1	1.06	0.91	0.91	0.85	28	11	11	Carbamidomethylation; TMT10plex	63954	NADP-dependent malic enzyme OS=Mus musculus OX=10090 GN=Me1 PE=1 SV=2
991	12162	P16460	4.61	226.48	1674500	1654500	1670200	1759100	1465300	1549800	1.01	1	1.01	1.06	0.89	0.94	1674500	1654500	1670200	1759100	1465300	1549800	1.01	1	1.01	1.06	0.89	0.94	28	13	13	Carbamidomethylation; TMT10plex	46585	Argininosuccinate synthase OS=Mus musculus OX=10090 GN=Ass1 PE=1 SV=1
1937	13844	P59328	17.31	226.44	168540	168120	153100	114760	125400	148550	1	1	0.91	0.68	0.75	0.88	168540	168120	153100	114760	125400	148550	1	1	0.91	0.68	0.75	0.88	11	8	8	Carbamidomethylation; TMT10plex	124254	WD repeat and HMG-box DNA-binding protein 1 OS=Mus musculus OX=10090 GN=Wdhd1 PE=1 SV=2
1063	481	Q6NZN0	10.11	226.42	959600	993310	1008100	887050	801170	997650	0.97	1	1.01	0.89	0.81	1	959600	993310	1008100	887050	801170	997650	0.97	1	1.01	0.89	0.81	1	16	15	15	Carbamidomethylation; TMT10plex	114143	RNA-binding protein 26 OS=Mus musculus OX=10090 GN=Rbm26 PE=1 SV=2
668	14967	Q8CGF7	2.94	226.32	3213400	3427300	3123600	3182500	3363700	3423900	0.94	1	0.91	0.93	0.98	1	3213400	3427300	3123600	3182500	3363700	3423900	0.94	1	0.91	0.93	0.98	1	16	16	16	Carbamidomethylation; TMT10plex	123788	Transcription elongation regulator 1 OS=Mus musculus OX=10090 GN=Tcerg1 PE=1 SV=2
768	15773	P49312	9.42	226.31	2329200	2970800	2612400	2864200	2915400	2862900	0.78	1	0.88	0.96	0.98	0.96	2329200	2970800	2612400	2864200	2915400	2862900	0.78	1	0.88	0.96	0.98	0.96	26	11	8	Carbamidomethylation; TMT10plex	34196	Heterogeneous nuclear ribonucleoprotein A1 OS=Mus musculus OX=10090 GN=Hnrnpa1 PE=1 SV=2
890	322	Q04750	12.42	226.29	1501900	1614000	1714400	1556300	1559800	1317100	0.93	1	1.06	0.96	0.97	0.82	1501900	1614000	1714400	1556300	1559800	1317100	0.93	1	1.06	0.96	0.97	0.82	21	15	15	Carbamidomethylation; TMT10plex	90876	DNA topoisomerase 1 OS=Mus musculus OX=10090 GN=Top1 PE=1 SV=2
558	154	P53811	5.41	226.28	2228800	2229300	1941800	1872000	2129500	1817700	1	1	0.87	0.84	0.96	0.82	2228800	2229300	1941800	1872000	2129500	1817700	1	1	0.87	0.84	0.96	0.82	51	16	13	Carbamidomethylation; TMT10plex	31487	Phosphatidylinositol transfer protein beta isoform OS=Mus musculus OX=10090 GN=Pitpnb PE=1 SV=2
1635	9490	O55106	15.57	226.21	101400	105510	103870	112340	77752	100170	0.96	1	0.98	1.06	0.74	0.95	101400	105510	103870	112340	77752	100170	0.96	1	0.98	1.06	0.74	0.95	15	9	7	Carbamidomethylation; TMT10plex	85966	Striatin OS=Mus musculus OX=10090 GN=Strn PE=1 SV=2
745	483	P60229	3.49	226.17	3051500	3182300	2981100	3148800	3312700	3001000	0.96	1	0.94	0.99	1.04	0.94	3051500	3182300	2981100	3148800	3312700	3001000	0.96	1	0.94	0.99	1.04	0.94	35	15	15	Carbamidomethylation; TMT10plex	52221	Eukaryotic translation initiation factor 3 subunit E OS=Mus musculus OX=10090 GN=Eif3e PE=1 SV=1
900	3474	Q99K67	4.98	225.95	1876900	1831000	1985100	2206600	1906400	2033500	1.03	1	1.08	1.21	1.04	1.11	1876900	1831000	1985100	2206600	1906400	2033500	1.03	1	1.08	1.21	1.04	1.11	19	15	15	Carbamidomethylation; TMT10plex	102975	Alpha-aminoadipic semialdehyde synthase mitochondrial OS=Mus musculus OX=10090 GN=Aass PE=1 SV=1
1519	1037	Q8BG51	9.67	225.73	377510	419280	405050	344200	506250	359130	0.9	1	0.97	0.82	1.21	0.86	377510	419280	405050	344200	506250	359130	0.9	1	0.97	0.82	1.21	0.86	19	10	8	Carbamidomethylation; TMT10plex	72242	Mitochondrial Rho GTPase 1 OS=Mus musculus OX=10090 GN=Rhot1 PE=1 SV=1
1114	15788	Q6P1D5	34.86	225.7	2187500	1818200	3036900	2051900	2215800	1939800	1.2	1	1.67	1.13	1.22	1.07	2187500	1818200	3036900	2051900	2215800	1939800	1.2	1	1.67	1.13	1.22	1.07	10	9	9	TMT10plex	104827	Seizure 6-like protein OS=Mus musculus OX=10090 GN=Sez6l PE=1 SV=1
1607	3659	Q9ES00	7.82	225.59	382630	436320	367790	350820	381920	417650	0.88	1	0.84	0.8	0.88	0.96	382630	436320	367790	350820	381920	417650	0.88	1	0.84	0.8	0.88	0.96	11	10	10	Carbamidomethylation; TMT10plex	133317	Ubiquitin conjugation factor E4 B OS=Mus musculus OX=10090 GN=Ube4b PE=1 SV=3
848	8294	Q8C7X2	3.73	225.59	1562700	1700300	1562500	1458300	1537600	1561000	0.92	1	0.92	0.86	0.9	0.92	1562700	1700300	1562500	1458300	1537600	1561000	0.92	1	0.92	0.86	0.9	0.92	22	18	18	Carbamidomethylation; TMT10plex	111605	ER membrane protein complex subunit 1 OS=Mus musculus OX=10090 GN=Emc1 PE=1 SV=1
1149	1978	Q8R3N6	29.94	225.52	433790	399120	521730	456410	330780	402740	1.09	1	1.31	1.14	0.83	1.01	433790	399120	521730	456410	330780	402740	1.09	1	1.31	1.14	0.83	1.01	17	10	10	Carbamidomethylation; TMT10plex	75436	THO complex subunit 1 OS=Mus musculus OX=10090 GN=Thoc1 PE=1 SV=1
976	1581	Q6DIC0	16.34	225.51	188900	232890	224670	264480	170010	187560	0.81	1	0.96	1.14	0.73	0.81	188900	232890	224670	264480	170010	187560	0.81	1	0.96	1.14	0.73	0.81	5	13	6	TMT10plex	180252	Probable global transcription activator SNF2L2 OS=Mus musculus OX=10090 GN=Smarca2 PE=1 SV=1
880	2654	Q91VC3	4.14	225.46	1879300	2113900	1972300	1877800	2150300	1748400	0.89	1	0.93	0.89	1.02	0.83	1879300	2113900	1972300	1877800	2150300	1748400	0.89	1	0.93	0.89	1.02	0.83	25	14	11	TMT10plex	46840	Eukaryotic initiation factor 4A-III OS=Mus musculus OX=10090 GN=Eif4a3 PE=1 SV=3
1097	357	Q99KC8	15.83	225.44	709920	840030	819850	682290	615680	777150	0.85	1	0.98	0.81	0.73	0.93	709920	840030	819850	682290	615680	777150	0.85	1	0.98	0.81	0.73	0.93	22	15	15	Carbamidomethylation; TMT10plex	87143	von Willebrand factor A domain-containing protein 5A OS=Mus musculus OX=10090 GN=Vwa5a PE=1 SV=2
1175	360	P33609	12.45	225.37	548900	618220	531490	600690	474750	590080	0.89	1	0.86	0.97	0.77	0.95	548900	618220	531490	600690	474750	590080	0.89	1	0.86	0.97	0.77	0.95	12	14	14	Carbamidomethylation; TMT10plex	167339	DNA polymerase alpha catalytic subunit OS=Mus musculus OX=10090 GN=Pola1 PE=1 SV=2
1292	14450	Q91YI0	23.28	225.36	3891600	3777600	4234900	3632400	5590300	3978900	1.03	1	1.12	0.96	1.48	1.05	3891600	3777600	4234900	3632400	5590300	3978900	1.03	1	1.12	0.96	1.48	1.05	26	11	11	TMT10plex	51739	Argininosuccinate lyase OS=Mus musculus OX=10090 GN=Asl PE=1 SV=1
1255	2072	Q8BTS4	32.88	225.33	889650	1103600	913220	794240	681890	855780	0.81	1	0.83	0.72	0.62	0.78	889650	1103600	913220	794240	681890	855780	0.81	1	0.83	0.72	0.62	0.78	26	11	11	TMT10plex	55732	Nuclear pore complex protein Nup54 OS=Mus musculus OX=10090 GN=Nup54 PE=1 SV=1
1079	15697	Q1HFZ0	2.23	225.27	618300	629190	656310	652240	594100	609960	0.98	1	1.04	1.04	0.94	0.97	618300	629190	656310	652240	594100	609960	0.98	1	1.04	1.04	0.94	0.97	22	13	13	Carbamidomethylation; TMT10plex	85452	RNA cytosine C(5)-methyltransferase NSUN2 OS=Mus musculus OX=10090 GN=Nsun2 PE=1 SV=2
1270	15797	O70252	6.38	225.19	1587900	1859500	1632100	1671000	1574400	1597000	0.85	1	0.88	0.9	0.85	0.86	1587900	1859500	1632100	1671000	1574400	1597000	0.85	1	0.88	0.9	0.85	0.86	35	10	10	TMT10plex	35739	Heme oxygenase 2 OS=Mus musculus OX=10090 GN=Hmox2 PE=1 SV=1
1360	3926	Q921G8	1.88	225.11	581080	576830	576000	558020	547090	540650	1.01	1	1	0.97	0.95	0.94	581080	576830	576000	558020	547090	540650	1.01	1	1	0.97	0.95	0.94	15	11	11	Carbamidomethylation; TMT10plex	103223	Gamma-tubulin complex component 2 OS=Mus musculus OX=10090 GN=Tubgcp2 PE=1 SV=2
1308	4212	Q9QZ06	88.06	225.07	1659000	1945800	1462800	1590100	3378300	1677500	0.85	1	0.75	0.82	1.74	0.86	1659000	1945800	1462800	1590100	3378300	1677500	0.85	1	0.75	0.82	1.74	0.86	32	9	9	TMT10plex	30345	Toll-interacting protein OS=Mus musculus OX=10090 GN=Tollip PE=1 SV=1
679	2803	Q9CY58	21.98	224.8	8208600	7331500	9478900	10565000	10704000	11035000	1.12	1	1.29	1.44	1.46	1.51	8208600	7331500	9478900	10565000	10704000	11035000	1.12	1	1.29	1.44	1.46	1.51	34	14	14	Carbamidomethylation; TMT10plex	44714	Plasminogen activator inhibitor 1 RNA-binding protein OS=Mus musculus OX=10090 GN=Serbp1 PE=1 SV=2
1461	4639	P55264	2.67	224.58	4412300	4565600	4251000	4449900	4628200	4257200	0.97	1	0.93	0.97	1.01	0.93	4412300	4565600	4251000	4449900	4628200	4257200	0.97	1	0.93	0.97	1.01	0.93	25	9	9	Carbamidomethylation; TMT10plex	40149	Adenosine kinase OS=Mus musculus OX=10090 GN=Adk PE=1 SV=2
825	3826	Q7TPH6	5.53	224.56	587330	612440	621080	590190	543710	527650	0.96	1	1.01	0.96	0.89	0.86	587330	612440	621080	590190	543710	527650	0.96	1	1.01	0.96	0.89	0.86	4	17	17	Carbamidomethylation; TMT10plex	521239	E3 ubiquitin-protein ligase MYCBP2 OS=Mus musculus OX=10090 GN=Mycbp2 PE=1 SV=3
869	3402	P46467	7.8	224.54	890260	759540	876720	725130	689240	739480	1.17	1	1.15	0.95	0.91	0.97	890260	759540	876720	725130	689240	739480	1.17	1	1.15	0.95	0.91	0.97	27	15	10	Carbamidomethylation; TMT10plex	49419	Vacuolar protein sorting-associated protein 4B OS=Mus musculus OX=10090 GN=Vps4b PE=1 SV=2
904	4854	P48758	5	224.5	3481100	3803700	3260900	3280700	3349100	3001900	0.92	1	0.86	0.86	0.88	0.79	3481100	3803700	3260900	3280700	3349100	3001900	0.92	1	0.86	0.86	0.88	0.79	47	13	12	Carbamidomethylation; TMT10plex	30641	Carbonyl reductase [NADPH] 1 OS=Mus musculus OX=10090 GN=Cbr1 PE=1 SV=3
1216	4139	P23492	11.92	224.42	3125300	2788100	3252300	3613000	2967400	3178400	1.12	1	1.17	1.3	1.06	1.14	3125300	2788100	3252300	3613000	2967400	3178400	1.12	1	1.17	1.3	1.06	1.14	35	9	9	TMT10plex	32277	Purine nucleoside phosphorylase OS=Mus musculus OX=10090 GN=Pnp PE=1 SV=2
775	15702	Q61655	3.62	224.37	1200300	1299800	1324500	1280700	1448600	1360400	0.92	1	1.02	0.99	1.11	1.05	1200300	1299800	1324500	1280700	1448600	1360400	0.92	1	1.02	0.99	1.11	1.05	28	13	11	Carbamidomethylation; TMT10plex	53933	ATP-dependent RNA helicase DDX19A OS=Mus musculus OX=10090 GN=Ddx19a PE=1 SV=2
984	5628	Q6P2L7	9.68	224.35	2001600	2199700	1928000	1975900	1759800	1819400	0.91	1	0.88	0.9	0.8	0.83	2001600	2199700	1928000	1975900	1759800	1819400	0.91	1	0.88	0.9	0.8	0.83	23	12	12	Carbamidomethylation; TMT10plex; Oxidation (M)	49409	Protein CASC4 OS=Mus musculus OX=10090 GN=Casc4 PE=1 SV=1
1033	6467	Q64674	7.56	224.18	8045600	9364700	8233600	7885500	7760100	7378100	0.86	1	0.88	0.84	0.83	0.79	8045600	9364700	8233600	7885500	7760100	7378100	0.86	1	0.88	0.84	0.83	0.79	45	12	12	Carbamidomethylation; TMT10plex	33995	Spermidine synthase OS=Mus musculus OX=10090 GN=Srm PE=1 SV=1
244	145	P43276	9.56	224.16	9012100	8971600	11192000	11294000	10701000	9202300	1	1	1.25	1.26	1.19	1.03	9012100	8971600	11192000	11294000	10701000	9202300	1	1	1.25	1.26	1.19	1.03	33	16	12	TMT10plex	22576	Histone H1.5 OS=Mus musculus OX=10090 GN=H1-5 PE=1 SV=2
1194	10149	Q9Z2M7	9.62	224.09	1509900	1559900	1631200	1415800	1306200	1477900	0.97	1	1.05	0.91	0.84	0.95	1509900	1559900	1631200	1415800	1306200	1477900	0.97	1	1.05	0.91	0.84	0.95	30	9	9	Carbamidomethylation; TMT10plex	27657	Phosphomannomutase 2 OS=Mus musculus OX=10090 GN=Pmm2 PE=1 SV=1
866	10078	Q6A068	5.21	223.63	1528000	1623400	1733100	1639000	1662200	1501600	0.94	1	1.07	1.01	1.02	0.92	1528000	1623400	1733100	1639000	1662200	1501600	0.94	1	1.07	1.01	1.02	0.92	27	17	17	Carbamidomethylation; TMT10plex	92190	Cell division cycle 5-like protein OS=Mus musculus OX=10090 GN=Cdc5l PE=1 SV=2
457	12069	O08807	9.69	223.58	8373500	7015000	7126500	8951700	8062500	8883800	1.19	1	1.02	1.28	1.15	1.27	8373500	7015000	7126500	8951700	8062500	8883800	1.19	1	1.02	1.28	1.15	1.27	41	11	9	Carbamidomethylation; TMT10plex	31053	Peroxiredoxin-4 OS=Mus musculus OX=10090 GN=Prdx4 PE=1 SV=1
1118	15845	P62830	8.32	223.47	2644500	2822500	2433800	3018400	2559200	2491300	0.94	1	0.86	1.07	0.91	0.88	2644500	2822500	2433800	3018400	2559200	2491300	0.94	1	0.86	1.07	0.91	0.88	59	9	9	Carbamidomethylation; TMT10plex	14865	60S ribosomal protein L23 OS=Mus musculus OX=10090 GN=Rpl23 PE=1 SV=1
782	1183	P62717	9.96	223.37	10666000	13391000	12441000	12106000	10850000	12047000	0.8	1	0.93	0.9	0.81	0.9	10666000	13391000	12441000	12106000	10850000	12047000	0.8	1	0.93	0.9	0.81	0.9	42	9	9	Carbamidomethylation; TMT10plex; Oxidation (M)	20732	60S ribosomal protein L18a OS=Mus musculus OX=10090 GN=Rpl18a PE=1 SV=1
1981	2912	Q8BXR1	113	223.29	426090	438800	383950	444460	1000000	327790	0.97	1	0.88	1.01	2.28	0.75	426090	438800	383950	444460	1000000	327790	0.97	1	0.88	1.01	2.28	0.75	13	8	8	Carbamidomethylation; TMT10plex	83984	Probable cationic amino acid transporter OS=Mus musculus OX=10090 GN=Slc7a14 PE=1 SV=1
838	531	Q05D44	8.6	223.23	2123900	1927200	2071500	1993300	1686500	1997900	1.1	1	1.07	1.03	0.88	1.04	2123900	1927200	2071500	1993300	1686500	1997900	1.1	1	1.07	1.03	0.88	1.04	18	17	17	Carbamidomethylation; TMT10plex	137616	Eukaryotic translation initiation factor 5B OS=Mus musculus OX=10090 GN=Eif5b PE=1 SV=2
1247	5959	Q9CSH3	10.04	223.22	466700	423560	482020	432090	383490	387140	1.1	1	1.14	1.02	0.91	0.91	466700	423560	482020	432090	383490	387140	1.1	1	1.14	1.02	0.91	0.91	15	12	12	Carbamidomethylation; TMT10plex	108837	Exosome complex exonuclease RRP44 OS=Mus musculus OX=10090 GN=Dis3 PE=1 SV=4
1590	12299	P42208	8.65	223.2	1424300	1519700	1510100	1389500	1236100	1625000	0.94	1	0.99	0.91	0.81	1.07	1424300	1519700	1510100	1389500	1236100	1625000	0.94	1	0.99	0.91	0.81	1.07	31	8	8	TMT10plex	41526	Septin-2 OS=Mus musculus OX=10090 GN=Septin2 PE=1 SV=2
1527	10238	Q8BP48	7.19	223.14	329620	323900	291920	319310	349950	250280	1.02	1	0.9	0.99	1.08	0.77	329620	323900	291920	319310	349950	250280	1.02	1	0.9	0.99	1.08	0.77	29	8	8	Carbamidomethylation; TMT10plex	43221	Methionine aminopeptidase 1 OS=Mus musculus OX=10090 GN=Metap1 PE=1 SV=1
996	5639	P21279	29.54	223.07	306900	263620	343490	312690	218560	238120	1.16	1	1.3	1.19	0.83	0.9	306900	263620	343490	312690	218560	238120	1.16	1	1.3	1.19	0.83	0.9	31	11	9	Carbamidomethylation; TMT10plex	42158	Guanine nucleotide-binding protein G(q) subunit alpha OS=Mus musculus OX=10090 GN=Gnaq PE=1 SV=4
1145	627	Q8R1U1	12.13	223.03	811380	960660	794440	752150	741080	757680	0.84	1	0.83	0.78	0.77	0.79	811380	960660	794440	752150	741080	757680	0.84	1	0.83	0.78	0.77	0.79	17	13	12	Carbamidomethylation; TMT10plex	88661	Conserved oligomeric Golgi complex subunit 4 OS=Mus musculus OX=10090 GN=Cog4 PE=1 SV=1
962	15708	Q91ZV0	4.05	222.9	913360	906000	1049700	1030300	948410	950630	1.01	1	1.16	1.14	1.05	1.05	913360	906000	1049700	1030300	948410	950630	1.01	1	1.16	1.14	1.05	1.05	12	14	14	TMT10plex	156461	Melanoma inhibitory activity protein 2 OS=Mus musculus OX=10090 GN=Mia2 PE=1 SV=3
1803	15864	Q9R1J0	8.79	222.84	1356600	1422700	1671500	1535700	1541500	1582900	0.95	1	1.17	1.08	1.08	1.11	1356600	1422700	1671500	1535700	1541500	1582900	0.95	1	1.17	1.08	1.08	1.11	27	7	7	Carbamidomethylation; TMT10plex	40686	Sterol-4-alpha-carboxylate 3-dehydrogenase decarboxylating OS=Mus musculus OX=10090 GN=Nsdhl PE=1 SV=1
1044	862	Q3URD3	19.42	222.82	452530	493090	417250	492240	592480	321060	0.92	1	0.85	1	1.2	0.65	452530	493090	417250	492240	592480	321060	0.92	1	0.85	1	1.2	0.65	20	13	13	Carbamidomethylation; TMT10plex	96933	Sarcolemmal membrane-associated protein OS=Mus musculus OX=10090 GN=Slmap PE=1 SV=2
1304	10019	Q8R3Q0	12.35	222.78	523300	579610	619000	589360	476020	575980	0.9	1	1.07	1.02	0.82	0.99	523300	579610	619000	589360	476020	575980	0.9	1	1.07	1.02	0.82	0.99	32	8	8	Carbamidomethylation; TMT10plex	35856	Store-operated calcium entry-associated regulatory factor OS=Mus musculus OX=10090 GN=Saraf PE=1 SV=2
1164	15674	Q99J36	31.05	222.72	3654900	3118800	4113400	3883900	2610100	2582400	1.17	1	1.32	1.25	0.84	0.83	3654900	3118800	4113400	3883900	2610100	2582400	1.17	1	1.32	1.25	0.84	0.83	28	11	11	Carbamidomethylation; TMT10plex	38885	THUMP domain-containing protein 1 OS=Mus musculus OX=10090 GN=Thumpd1 PE=1 SV=1
601	15855	P10639	10.66	222.6	11556000	12494000	14115000	14665000	14153000	14206000	0.92	1	1.13	1.17	1.13	1.14	11556000	12494000	14115000	14665000	14153000	14206000	0.92	1	1.13	1.17	1.13	1.14	89	9	9	Carbamidomethylation; TMT10plex; Oxidation (M)	11675	Thioredoxin OS=Mus musculus OX=10090 GN=Txn PE=1 SV=3
1150	2944	Q8BUK6	5.21	222.51	380870	414960	404670	356070	467100	401440	0.92	1	0.98	0.86	1.13	0.97	380870	414960	404670	356070	467100	401440	0.92	1	0.98	0.86	1.13	0.97	20	12	12	Carbamidomethylation; TMT10plex	83218	Protein Hook homolog 3 OS=Mus musculus OX=10090 GN=Hook3 PE=1 SV=2
621	7966	P32020	9.38	222.38	3657000	3954400	3436200	3209300	3178800	3355200	0.92	1	0.87	0.81	0.8	0.85	3657000	3954400	3436200	3209300	3178800	3355200	0.92	1	0.87	0.81	0.8	0.85	24	16	16	Carbamidomethylation; TMT10plex	59126	Non-specific lipid-transfer protein OS=Mus musculus OX=10090 GN=Scp2 PE=1 SV=3
1106	11708	Q9Z1D1	9.07	222.37	1284100	1277200	1148000	1048800	1208400	1421100	1.01	1	0.9	0.82	0.95	1.11	1284100	1277200	1148000	1048800	1208400	1421100	1.01	1	0.9	0.82	0.95	1.11	35	10	10	Carbamidomethylation; TMT10plex	35638	Eukaryotic translation initiation factor 3 subunit G OS=Mus musculus OX=10090 GN=Eif3g PE=1 SV=2
1358	15734	Q8R366	8.14	222.32	1095300	924500	1006500	868810	1013700	855700	1.18	1	1.09	0.94	1.1	0.93	1095300	924500	1006500	868810	1013700	855700	1.18	1	1.09	0.94	1.1	0.93	21	9	9	Carbamidomethylation; TMT10plex	65011	Immunoglobulin superfamily member 8 OS=Mus musculus OX=10090 GN=Igsf8 PE=1 SV=2
1497	4026	Q6PAM1	8.99	222.11	902270	887640	956540	1006900	859590	1182500	1.02	1	1.08	1.13	0.97	1.33	902270	887640	956540	1006900	859590	1182500	1.02	1	1.08	1.13	0.97	1.33	23	11	11	Carbamidomethylation; TMT10plex	62369	Alpha-taxilin OS=Mus musculus OX=10090 GN=Txlna PE=1 SV=1
799	1779	O70310	12.53	222.04	2209900	2182900	2046000	2030700	2667100	2001000	1.01	1	0.94	0.93	1.22	0.92	2209900	2182900	2046000	2030700	2667100	2001000	1.01	1	0.94	0.93	1.22	0.92	29	15	13	TMT10plex	56888	Glycylpeptide N-tetradecanoyltransferase 1 OS=Mus musculus OX=10090 GN=Nmt1 PE=1 SV=1
1482	1383	Q3TDD9	4.4	222.03	467120	447610	476940	404890	472490	423750	1.04	1	1.07	0.9	1.06	0.95	467120	447610	476940	404890	472490	423750	1.04	1	1.07	0.9	1.06	0.95	20	11	11	Carbamidomethylation; TMT10plex	88337	Protein phosphatase 1 regulatory subunit 21 OS=Mus musculus OX=10090 GN=Ppp1r21 PE=1 SV=2
908	3396	Q64378	7.86	221.96	2529400	2607500	2471300	2420200	2149600	2087800	0.97	1	0.95	0.93	0.82	0.8	2529400	2607500	2471300	2420200	2149600	2087800	0.97	1	0.95	0.93	0.82	0.8	35	16	16	Carbamidomethylation; TMT10plex	50966	Peptidyl-prolyl cis-trans isomerase FKBP5 OS=Mus musculus OX=10090 GN=Fkbp5 PE=1 SV=1
1293	9936	Q61823	23.48	221.83	866440	719670	1037300	869620	699480	758410	1.2	1	1.44	1.21	0.97	1.05	866440	719670	1037300	869620	699480	758410	1.2	1	1.44	1.21	0.97	1.05	29	11	11	Carbamidomethylation; TMT10plex	51702	Programmed cell death protein 4 OS=Mus musculus OX=10090 GN=Pdcd4 PE=1 SV=1
1152	15738	Q9QZE7	13.55	221.83	2407500	2581200	2631800	2380900	1991000	2090400	0.93	1	1.02	0.92	0.77	0.81	2407500	2581200	2631800	2380900	1991000	2090400	0.93	1	1.02	0.92	0.77	0.81	40	12	12	Carbamidomethylation; TMT10plex	32926	Translin-associated protein X OS=Mus musculus OX=10090 GN=Tsnax PE=1 SV=1
760	188	Q8VD04	9.43	221.79	1203300	1022800	1168800	1236400	1278400	1206000	1.18	1	1.14	1.21	1.25	1.18	1203300	1022800	1168800	1236400	1278400	1206000	1.18	1	1.14	1.21	1.25	1.18	29	19	19	Carbamidomethylation; TMT10plex	92715	GRIP1-associated protein 1 OS=Mus musculus OX=10090 GN=Gripap1 PE=1 SV=1
1434	7134	Q9JKC8	9.17	221.7	1503000	1667400	1300000	1465900	1352400	1590800	0.9	1	0.78	0.88	0.81	0.95	1503000	1667400	1300000	1465900	1352400	1590800	0.9	1	0.78	0.88	0.81	0.95	31	11	9	Carbamidomethylation; TMT10plex	46936	AP-3 complex subunit mu-1 OS=Mus musculus OX=10090 GN=Ap3m1 PE=1 SV=1
1469	9600	Q99J62	12.96	221.67	549050	570850	615410	518470	493300	469260	0.96	1	1.08	0.91	0.86	0.82	549050	570850	615410	518470	493300	469260	0.96	1	1.08	0.91	0.86	0.82	31	10	10	Carbamidomethylation; TMT10plex	39867	Replication factor C subunit 4 OS=Mus musculus OX=10090 GN=Rfc4 PE=1 SV=1
1050	1426	A2AFS3	12.03	221.66	859830	852800	862920	754350	666620	741080	1.01	1	1.01	0.88	0.78	0.87	859830	852800	862920	754350	666620	741080	1.01	1	1.01	0.88	0.78	0.87	13	11	11	Carbamidomethylation; TMT10plex	110682	UPF0577 protein KIAA1324 OS=Mus musculus OX=10090 GN=Kiaa1324 PE=1 SV=1
899	3192	Q8C167	2.3	221.61	1598700	1606200	1528400	1469200	1490000	1420900	1	1	0.95	0.91	0.93	0.88	1598700	1606200	1528400	1469200	1490000	1420900	1	1	0.95	0.91	0.93	0.88	22	13	13	Carbamidomethylation; TMT10plex	83194	Prolyl endopeptidase-like OS=Mus musculus OX=10090 GN=Prepl PE=1 SV=1
688	4872	Q9Z1R2	4.96	221.61	3815300	3439100	3784600	4069100	3434100	3773100	1.11	1	1.1	1.18	1	1.1	3815300	3439100	3784600	4069100	3434100	3773100	1.11	1	1.1	1.18	1	1.1	22	19	19	Carbamidomethylation; TMT10plex	121037	Large proline-rich protein BAG6 OS=Mus musculus OX=10090 GN=Bag6 PE=1 SV=1
2068	15846	Q9D9V3	50.81	221.44	292260	371870	330010	346460	200460	346790	0.79	1	0.89	0.93	0.54	0.93	292260	371870	330010	346460	200460	346790	0.79	1	0.89	0.93	0.54	0.93	28	8	8	Carbamidomethylation; TMT10plex	35467	Ethylmalonyl-CoA decarboxylase OS=Mus musculus OX=10090 GN=Echdc1 PE=1 SV=2
740	8613	Q9D8W5	9.17	221.41	4173000	4497000	3967100	4155700	3627100	3730300	0.93	1	0.88	0.92	0.81	0.83	4173000	4497000	3967100	4155700	3627100	3730300	0.93	1	0.88	0.92	0.81	0.83	39	15	15	Carbamidomethylation; TMT10plex	52895	26S proteasome non-ATPase regulatory subunit 12 OS=Mus musculus OX=10090 GN=Psmd12 PE=1 SV=4
1674	6135	Q8BU33	24.95	221.35	498270	520160	544620	519600	402330	361890	0.96	1	1.05	1	0.77	0.7	498270	520160	544620	519600	402330	361890	0.96	1	1.05	1	0.77	0.7	25	9	9	Carbamidomethylation; TMT10plex	68156	Acetolactate synthase-like protein OS=Mus musculus OX=10090 GN=Ilvbl PE=1 SV=1
747	761	Q9CZT8	51.44	221.21	351620	424590	287160	410060	227890	228620	0.83	1	0.68	0.97	0.54	0.54	351620	424590	287160	410060	227890	228620	0.83	1	0.68	0.97	0.54	0.54	34	10	5	Carbamidomethylation; TMT10plex	24757	Ras-related protein Rab-3B OS=Mus musculus OX=10090 GN=Rab3b PE=1 SV=1
1083	295	P47791	3.13	221.2	3097200	2996100	3317300	3074200	3177500	3401100	1.03	1	1.11	1.03	1.06	1.14	3097200	2996100	3317300	3074200	3177500	3401100	1.03	1	1.11	1.03	1.06	1.14	26	11	11	Carbamidomethylation; TMT10plex	53663	Glutathione reductase mitochondrial OS=Mus musculus OX=10090 GN=Gsr PE=1 SV=3
733	116	Q9WTX5	4.43	221.19	3284300	3517100	3311100	3672700	3098000	3308900	0.93	1	0.94	1.04	0.88	0.94	3284300	3517100	3311100	3672700	3098000	3308900	0.93	1	0.94	1.04	0.88	0.94	53	9	9	Carbamidomethylation; TMT10plex	18672	S-phase kinase-associated protein 1 OS=Mus musculus OX=10090 GN=Skp1 PE=1 SV=3
1345	1691	Q60710	22.89	220.86	1106700	1045000	1090900	1062000	1540200	1002800	1.06	1	1.04	1.02	1.47	0.96	1106700	1045000	1090900	1062000	1540200	1002800	1.06	1	1.04	1.02	1.47	0.96	20	11	11	Carbamidomethylation; TMT10plex	75893	Deoxynucleoside triphosphate triphosphohydrolase SAMHD1 OS=Mus musculus OX=10090 GN=Samhd1 PE=1 SV=3
1782	15741	Q0VGB7	4.74	220.72	816070	763400	788900	834030	872470	741970	1.07	1	1.03	1.09	1.14	0.97	816070	763400	788900	834030	872470	741970	1.07	1	1.03	1.09	1.14	0.97	30	9	9	Carbamidomethylation; TMT10plex	46479	Serine/threonine-protein phosphatase 4 regulatory subunit 2 OS=Mus musculus OX=10090 GN=Ppp4r2 PE=1 SV=1
1127	15908	Q9DBZ5	4.41	220.69	1287100	1214300	1213800	1115800	1086600	1085100	1.06	1	1	0.92	0.89	0.89	1287100	1214300	1213800	1115800	1086600	1085100	1.06	1	1	0.92	0.89	0.89	46	9	9	Carbamidomethylation; TMT10plex	25087	Eukaryotic translation initiation factor 3 subunit K OS=Mus musculus OX=10090 GN=Eif3k PE=1 SV=1
1407	11784	Q8BWY3	25.27	220.66	1838100	1828400	1619400	1537200	1211100	1414000	1.01	1	0.89	0.84	0.66	0.77	1838100	1828400	1619400	1537200	1211100	1414000	1.01	1	0.89	0.84	0.66	0.77	28	11	11	Carbamidomethylation; TMT10plex	49031	Eukaryotic peptide chain release factor subunit 1 OS=Mus musculus OX=10090 GN=Etf1 PE=1 SV=4
857	1082	Q921X9	13.79	220.62	4693300	4634400	4000400	4309900	3494600	3713800	1.01	1	0.86	0.93	0.75	0.8	4693300	4634400	4000400	4309900	3494600	3713800	1.01	1	0.86	0.93	0.75	0.8	22	12	12	Carbamidomethylation; TMT10plex	59267	Protein disulfide-isomerase A5 OS=Mus musculus OX=10090 GN=Pdia5 PE=1 SV=1
1197	10383	Q9Z2C9	6.37	220.58	726670	755300	724640	656050	639600	689490	0.96	1	0.96	0.87	0.85	0.91	726670	755300	724640	656050	639600	689490	0.96	1	0.96	0.87	0.85	0.91	22	13	13	Carbamidomethylation; TMT10plex	75608	Myotubularin-related protein 7 OS=Mus musculus OX=10090 GN=Mtmr7 PE=1 SV=2
972	1139	Q8R4H2	7.26	220.49	1376800	1260000	1422700	1120900	1450100	1277000	1.09	1	1.13	0.89	1.15	1.01	1376800	1260000	1422700	1120900	1450100	1277000	1.09	1	1.13	0.89	1.15	1.01	13	16	16	Carbamidomethylation; TMT10plex	172348	Rho guanine nucleotide exchange factor 12 OS=Mus musculus OX=10090 GN=Arhgef12 PE=1 SV=2
1163	2626	Q99JF8	29.47	220.31	1202600	1171700	1550400	1974000	1229700	1075000	1.03	1	1.32	1.68	1.05	0.92	1202600	1171700	1550400	1974000	1229700	1075000	1.03	1	1.32	1.68	1.05	0.92	18	12	10	Carbamidomethylation; TMT10plex	59697	PC4 and SFRS1-interacting protein OS=Mus musculus OX=10090 GN=Psip1 PE=1 SV=1
952	4843	Q9CYG7	9.64	220.27	3262400	3279100	3201900	3164600	2625000	3046500	0.99	1	0.98	0.97	0.8	0.93	3262400	3279100	3201900	3164600	2625000	3046500	0.99	1	0.98	0.97	0.8	0.93	50	15	15	Carbamidomethylation; TMT10plex	34278	Mitochondrial import receptor subunit TOM34 OS=Mus musculus OX=10090 GN=Tomm34 PE=1 SV=1
1088	12823	Q99L04	3.7	220.22	1704000	1680500	1651700	1720800	1844200	1811700	1.01	1	0.98	1.02	1.1	1.08	1704000	1680500	1651700	1720800	1844200	1811700	1.01	1	0.98	1.02	1.1	1.08	46	13	13	Carbamidomethylation; TMT10plex	34005	Dehydrogenase/reductase SDR family member 1 OS=Mus musculus OX=10090 GN=Dhrs1 PE=1 SV=1
1288	8263	Q05816	11	220.18	1220100	1519300	1184100	1146100	1354100	1303700	0.8	1	0.78	0.75	0.89	0.86	1220100	1519300	1184100	1146100	1354100	1303700	0.8	1	0.78	0.75	0.89	0.86	66	9	9	Carbamidomethylation; TMT10plex	15137	Fatty acid-binding protein 5 OS=Mus musculus OX=10090 GN=Fabp5 PE=1 SV=3
2162	4336	Q99J47	19.32	220.06	965330	1033400	937460	907260	728550	881310	0.93	1	0.91	0.88	0.71	0.85	965330	1033400	937460	907260	728550	881310	0.93	1	0.91	0.88	0.71	0.85	19	7	7	TMT10plex	34987	Dehydrogenase/reductase SDR family member 7B OS=Mus musculus OX=10090 GN=Dhrs7b PE=1 SV=1
1139	1556	Q8K310	7.85	220.04	1619200	1775800	1738100	1998100	2019500	1433000	0.91	1	0.98	1.13	1.14	0.81	1619200	1775800	1738100	1998100	2019500	1433000	0.91	1	0.98	1.13	1.14	0.81	17	13	13	Carbamidomethylation; TMT10plex	94630	Matrin-3 OS=Mus musculus OX=10090 GN=Matr3 PE=1 SV=1
1525	8650	P70318	9.86	220.02	826220	806700	813160	810490	1011200	818570	1.02	1	1.01	1	1.25	1.01	826220	806700	813160	810490	1011200	818570	1.02	1	1.01	1	1.25	1.01	26	9	9	Carbamidomethylation; TMT10plex	43389	Nucleolysin TIAR OS=Mus musculus OX=10090 GN=Tial1 PE=1 SV=1
1257	1159	O88532	32.26	219.97	584810	616900	727360	601580	451840	516000	0.95	1	1.18	0.98	0.73	0.84	584810	616900	727360	601580	451840	516000	0.95	1	1.18	0.98	0.73	0.84	17	13	13	Carbamidomethylation; TMT10plex	116859	Zinc finger RNA-binding protein OS=Mus musculus OX=10090 GN=Zfr PE=1 SV=2
1064	14509	Q3U186	5.04	219.96	739520	746290	704510	744080	809810	612590	0.99	1	0.94	1	1.09	0.82	739520	746290	704510	744080	809810	612590	0.99	1	0.94	1	1.09	0.82	28	14	14	Carbamidomethylation; TMT10plex	65336	Probable arginine--tRNA ligase mitochondrial OS=Mus musculus OX=10090 GN=Rars2 PE=1 SV=1
948	4068	Q91ZR1	5.26	219.96	817310	859150	738600	708700	751240	654220	0.95	1	0.86	0.82	0.87	0.76	817310	859150	738600	708700	751240	654220	0.95	1	0.86	0.82	0.87	0.76	35	8	6	Carbamidomethylation; TMT10plex	23629	Ras-related protein Rab-4B OS=Mus musculus OX=10090 GN=Rab4b PE=1 SV=2
1496	11406	Q9QYC0	9.27	219.94	297770	351290	313510	279320	325760	252440	0.85	1	0.89	0.8	0.93	0.72	297770	351290	313510	279320	325760	252440	0.85	1	0.89	0.8	0.93	0.72	16	11	10	Carbamidomethylation; TMT10plex	80647	Alpha-adducin OS=Mus musculus OX=10090 GN=Add1 PE=1 SV=2
1318	2722	Q9QXV0	10.32	219.88	5132000	4461400	5358100	5354300	5631800	5137600	1.15	1	1.2	1.2	1.26	1.15	5132000	4461400	5358100	5354300	5631800	5137600	1.15	1	1.2	1.2	1.26	1.15	32	7	7	TMT10plex	27270	ProSAAS OS=Mus musculus OX=10090 GN=Pcsk1n PE=1 SV=2
862	15732	Q6ZQI3	8.21	219.88	2678300	3256100	2639100	2820100	2742500	2964900	0.82	1	0.81	0.87	0.84	0.91	2678300	3256100	2639100	2820100	2742500	2964900	0.82	1	0.81	0.87	0.84	0.91	40	11	11	Carbamidomethylation; TMT10plex	32342	Malectin OS=Mus musculus OX=10090 GN=Mlec PE=1 SV=2
1144	12988	Q9CQ75	7.18	219.87	2517200	2883400	2405700	2578500	2700800	2157400	0.87	1	0.83	0.89	0.94	0.75	2517200	2883400	2405700	2578500	2700800	2157400	0.87	1	0.83	0.89	0.94	0.75	51	7	7	Carbamidomethylation; TMT10plex	10916	NADH dehydrogenase [ubiquinone] 1 alpha subcomplex subunit 2 OS=Mus musculus OX=10090 GN=Ndufa2 PE=1 SV=3
831	4877	Q8K1X1	6.65	219.86	1862300	1994100	1798600	1918400	1679900	1736200	0.93	1	0.9	0.96	0.84	0.87	1862300	1994100	1798600	1918400	1679900	1736200	0.93	1	0.9	0.96	0.84	0.87	17	17	17	Carbamidomethylation; TMT10plex	135937	WD repeat-containing protein 11 OS=Mus musculus OX=10090 GN=Wdr11 PE=1 SV=1
1454	6599	Q8CI33	2.37	219.83	1020600	1071600	1074700	1031500	1157400	1110000	0.95	1	1	0.96	1.08	1.04	1020600	1071600	1074700	1031500	1157400	1110000	0.95	1	1	0.96	1.08	1.04	23	11	11	Carbamidomethylation; TMT10plex	60194	CWF19-like protein 1 OS=Mus musculus OX=10090 GN=Cwf19l1 PE=1 SV=2
870	4629	P17439	3.38	219.81	3230800	3092200	3361000	3091800	3143500	3032800	1.04	1	1.09	1	1.02	0.98	3230800	3092200	3361000	3091800	3143500	3032800	1.04	1	1.09	1	1.02	0.98	32	14	14	Carbamidomethylation; TMT10plex	57622	Lysosomal acid glucosylceramidase OS=Mus musculus OX=10090 GN=Gba PE=1 SV=1
1681	12902	Q9R1R2	6.8	219.74	677040	687200	651420	543970	597280	573460	0.99	1	0.95	0.79	0.87	0.83	677040	687200	651420	543970	597280	573460	0.99	1	0.95	0.79	0.87	0.83	14	10	9	Carbamidomethylation; TMT10plex	80775	Tripartite motif-containing protein 3 OS=Mus musculus OX=10090 GN=Trim3 PE=1 SV=1
1024	2894	Q9WVJ2	6.27	219.68	2345800	2607200	2376500	2123600	2276500	2217800	0.9	1	0.91	0.81	0.87	0.85	2345800	2607200	2376500	2123600	2276500	2217800	0.9	1	0.91	0.81	0.87	0.85	35	14	14	Carbamidomethylation; TMT10plex	42809	26S proteasome non-ATPase regulatory subunit 13 OS=Mus musculus OX=10090 GN=Psmd13 PE=1 SV=1
1124	6873	Q9CQ62	12.19	219.29	1451000	1364100	1481100	1458000	1141500	1269100	1.06	1	1.09	1.07	0.84	0.93	1451000	1364100	1481100	1458000	1141500	1269100	1.06	1	1.09	1.07	0.84	0.93	37	9	9	Carbamidomethylation; TMT10plex	36214	2 4-dienoyl-CoA reductase mitochondrial OS=Mus musculus OX=10090 GN=Decr1 PE=1 SV=1
1259	5042	Q8BTY2	14.23	219.26	2392900	2240500	2349400	2192300	1761400	2180800	1.07	1	1.05	0.98	0.79	0.97	2392900	2240500	2349400	2192300	1761400	2180800	1.07	1	1.05	0.98	0.79	0.97	12	12	10	TMT10plex	116514	Sodium bicarbonate cotransporter 3 OS=Mus musculus OX=10090 GN=Slc4a7 PE=1 SV=2
582	1415	P35276	31.91	219.25	195340	212800	206980	165330	131200	201640	0.92	1	0.97	0.78	0.62	0.95	195340	212800	206980	165330	131200	201640	0.92	1	0.97	0.78	0.62	0.95	26	11	4	Carbamidomethylation; TMT10plex	24416	Ras-related protein Rab-3D OS=Mus musculus OX=10090 GN=Rab3d PE=1 SV=1
1450	3671	Q8C0L0	3.83	219.22	1964400	2059900	1810900	1917200	1858000	1820800	0.95	1	0.88	0.93	0.9	0.88	1964400	2059900	1810900	1917200	1858000	1820800	0.95	1	0.88	0.93	0.9	0.88	24	8	8	TMT10plex	37131	Thioredoxin-related transmembrane protein 4 OS=Mus musculus OX=10090 GN=Tmx4 PE=1 SV=2
942	557	P63323	12.92	219	7649400	8644700	7479800	8598800	9803500	9072300	0.88	1	0.87	0.99	1.13	1.05	7649400	8644700	7479800	8598800	9803500	9072300	0.88	1	0.87	0.99	1.13	1.05	56	9	9	Carbamidomethylation; TMT10plex	14525	40S ribosomal protein S12 OS=Mus musculus OX=10090 GN=Rps12 PE=1 SV=2
1456	4130	Q7TSC1	6.25	218.97	290040	294110	308800	358060	311480	330790	0.99	1	1.05	1.22	1.06	1.12	290040	294110	308800	358060	311480	330790	0.99	1	1.05	1.22	1.06	1.12	6	11	10	Carbamidomethylation; TMT10plex	229200	Protein PRRC2A OS=Mus musculus OX=10090 GN=Prrc2a PE=1 SV=1
1498	5503	Q91YR1	5.56	218.94	750200	737810	816290	789100	702260	732340	1.02	1	1.11	1.07	0.95	0.99	750200	737810	816290	789100	702260	732340	1.02	1	1.11	1.07	0.95	0.99	30	10	8	TMT10plex	40079	Twinfilin-1 OS=Mus musculus OX=10090 GN=Twf1 PE=1 SV=2
1204	1419	Q9JIG7	15.92	218.92	395690	370800	417180	444150	306110	372640	1.07	1	1.13	1.2	0.83	1	395690	370800	417180	444150	306110	372640	1.07	1	1.13	1.2	0.83	1	22	12	12	TMT10plex	70844	Coiled-coil domain-containing protein 22 OS=Mus musculus OX=10090 GN=Ccdc22 PE=1 SV=1
1224	3855	Q9Z129	14.09	218.9	978090	1131000	1126300	1138400	849550	990790	0.86	1	1	1.01	0.75	0.88	978090	1131000	1126300	1138400	849550	990790	0.86	1	1	1.01	0.75	0.88	21	12	12	Carbamidomethylation; TMT10plex	72484	ATP-dependent DNA helicase Q1 OS=Mus musculus OX=10090 GN=Recql PE=1 SV=2
982	15362	P70303	6.17	218.87	813000	848960	870110	753660	739710	814880	0.96	1	1.02	0.89	0.87	0.96	813000	848960	870110	753660	739710	814880	0.96	1	1.02	0.89	0.87	0.96	28	15	14	Carbamidomethylation; TMT10plex	65515	CTP synthase 2 OS=Mus musculus OX=10090 GN=Ctps2 PE=1 SV=1
1477	7263	P35951	7.7	218.85	413070	404750	448530	368590	456160	370760	1.02	1	1.11	0.91	1.13	0.92	413070	404750	448530	368590	456160	370760	1.02	1	1.11	0.91	1.13	0.92	14	9	9	Carbamidomethylation; TMT10plex	94947	Low-density lipoprotein receptor OS=Mus musculus OX=10090 GN=Ldlr PE=1 SV=2
851	9471	P11438	16.5	218.83	4810200	5806600	4896600	4145700	5011800	4905000	0.83	1	0.84	0.71	0.86	0.84	4810200	5806600	4896600	4145700	5011800	4905000	0.83	1	0.84	0.71	0.86	0.84	25	8	8	Carbamidomethylation; TMT10plex; Oxidation (M)	43865	Lysosome-associated membrane glycoprotein 1 OS=Mus musculus OX=10090 GN=Lamp1 PE=1 SV=2
809	10868	Q7TSV4	2.75	218.77	1408000	1480000	1514100	1505400	1387700	1457600	0.95	1	1.02	1.02	0.94	0.98	1408000	1480000	1514100	1505400	1387700	1457600	0.95	1	1.02	1.02	0.94	0.98	25	14	14	Carbamidomethylation; TMT10plex	68748	Phosphoglucomutase-2 OS=Mus musculus OX=10090 GN=Pgm2 PE=1 SV=1
1313	2949	Q9JIS5	10.2	218.71	1548800	1598600	1791600	1373800	1501900	1431300	0.97	1	1.12	0.86	0.94	0.9	1548800	1598600	1791600	1373800	1501900	1431300	0.97	1	1.12	0.86	0.94	0.9	17	10	10	TMT10plex	82647	Synaptic vesicle glycoprotein 2A OS=Mus musculus OX=10090 GN=Sv2a PE=1 SV=1
818	3206	Q8BVQ5	30.93	218.55	1070700	1215900	1130100	1141700	1819400	1148600	0.88	1	0.93	0.94	1.5	0.94	1070700	1215900	1130100	1141700	1819400	1148600	0.88	1	0.93	0.94	1.5	0.94	31	12	12	Carbamidomethylation; TMT10plex	42256	Protein phosphatase methylesterase 1 OS=Mus musculus OX=10090 GN=Ppme1 PE=1 SV=5
787	1328	Q9CRB9	14.11	218.53	5876000	5941800	5877600	7193800	7693300	7827300	0.99	1	0.99	1.21	1.29	1.32	5876000	5941800	5877600	7193800	7693300	7827300	0.99	1	0.99	1.21	1.29	1.32	40	11	11	Carbamidomethylation; TMT10plex	26335	MICOS complex subunit Mic19 OS=Mus musculus OX=10090 GN=Chchd3 PE=1 SV=1
1384	15726	Q9CQF9	8.71	218.51	1392400	1476400	1306400	1228500	1607800	1205800	0.94	1	0.88	0.83	1.09	0.82	1392400	1476400	1306400	1228500	1607800	1205800	0.94	1	0.88	0.83	1.09	0.82	27	10	10	Carbamidomethylation; TMT10plex	56495	Prenylcysteine oxidase OS=Mus musculus OX=10090 GN=Pcyox1 PE=1 SV=1
812	8188	Q9WUM5	5.14	218.51	18139000	18458000	17803000	17704000	16203000	15446000	0.98	1	0.96	0.96	0.88	0.84	18139000	18458000	17803000	17704000	16203000	15446000	0.98	1	0.96	0.96	0.88	0.84	27	10	10	Carbamidomethylation; TMT10plex; Oxidation (M)	36155	Succinate--CoA ligase [ADP/GDP-forming] subunit alpha mitochondrial OS=Mus musculus OX=10090 GN=Suclg1 PE=1 SV=4
1242	13588	O70318	9.5	218.41	659070	556120	629570	586610	505110	563760	1.19	1	1.13	1.05	0.91	1.01	659070	556120	629570	586610	505110	563760	1.19	1	1.13	1.05	0.91	1.01	13	12	11	TMT10plex	109940	Band 4.1-like protein 2 OS=Mus musculus OX=10090 GN=Epb41l2 PE=1 SV=2
1112	9126	Q3UM45	13.88	218.35	974490	965180	1030100	1047700	829130	775900	1.01	1	1.07	1.09	0.86	0.8	974490	965180	1030100	1047700	829130	775900	1.01	1	1.07	1.09	0.86	0.8	33	12	12	Carbamidomethylation; TMT10plex	41292	Protein phosphatase 1 regulatory subunit 7 OS=Mus musculus OX=10090 GN=Ppp1r7 PE=1 SV=2
1078	3866	P10854	15.78	218.28	6960700	8135600	7074800	7199500	5979900	7212000	0.86	1	0.87	0.88	0.74	0.89	6960700	8135600	7074800	7199500	5979900	7212000	0.86	1	0.87	0.88	0.74	0.89	47	7	7	TMT10plex; Oxidation (M)	13936	Histone H2B type 1-M OS=Mus musculus OX=10090 GN=H2bc14 PE=1 SV=2
1078	3867	Q6ZWY9	15.78	218.28	6960700	8135600	7074800	7199500	5979900	7212000	0.86	1	0.87	0.88	0.74	0.89	6960700	8135600	7074800	7199500	5979900	7212000	0.86	1	0.87	0.88	0.74	0.89	47	7	7	TMT10plex; Oxidation (M)	13906	Histone H2B type 1-C/E/G OS=Mus musculus OX=10090 GN=H2bc4 PE=1 SV=3
1078	3869	P10853	15.78	218.28	6960700	8135600	7074800	7199500	5979900	7212000	0.86	1	0.87	0.88	0.74	0.89	6960700	8135600	7074800	7199500	5979900	7212000	0.86	1	0.87	0.88	0.74	0.89	47	7	7	TMT10plex; Oxidation (M)	13936	Histone H2B type 1-F/J/L OS=Mus musculus OX=10090 GN=H2bc7 PE=1 SV=2
1078	3870	Q8CGP1	15.78	218.28	6960700	8135600	7074800	7199500	5979900	7212000	0.86	1	0.87	0.88	0.74	0.89	6960700	8135600	7074800	7199500	5979900	7212000	0.86	1	0.87	0.88	0.74	0.89	47	7	7	TMT10plex; Oxidation (M)	13920	Histone H2B type 1-K OS=Mus musculus OX=10090 GN=H2bc12 PE=1 SV=3
1078	3872	Q8CGP2	15.78	218.28	6960700	8135600	7074800	7199500	5979900	7212000	0.86	1	0.87	0.88	0.74	0.89	6960700	8135600	7074800	7199500	5979900	7212000	0.86	1	0.87	0.88	0.74	0.89	47	7	7	TMT10plex; Oxidation (M)	13992	Histone H2B type 1-P OS=Mus musculus OX=10090 GN=Hist1h2bp PE=1 SV=3
1078	3868	Q64525	15.78	218.28	6960700	8135600	7074800	7199500	5979900	7212000	0.86	1	0.87	0.88	0.74	0.89	6960700	8135600	7074800	7199500	5979900	7212000	0.86	1	0.87	0.88	0.74	0.89	47	7	7	TMT10plex; Oxidation (M)	13920	Histone H2B type 2-B OS=Mus musculus OX=10090 GN=Hist2h2bb PE=1 SV=3
1078	3871	Q64475	15.78	218.28	6960700	8135600	7074800	7199500	5979900	7212000	0.86	1	0.87	0.88	0.74	0.89	6960700	8135600	7074800	7199500	5979900	7212000	0.86	1	0.87	0.88	0.74	0.89	47	7	7	TMT10plex; Oxidation (M)	13952	Histone H2B type 1-B OS=Mus musculus OX=10090 GN=Hist1h2bb PE=1 SV=3
1078	3873	Q64478	15.78	218.28	6960700	8135600	7074800	7199500	5979900	7212000	0.86	1	0.87	0.88	0.74	0.89	6960700	8135600	7074800	7199500	5979900	7212000	0.86	1	0.87	0.88	0.74	0.89	47	7	7	TMT10plex; Oxidation (M)	13920	Histone H2B type 1-H OS=Mus musculus OX=10090 GN=Hist1h2bh PE=1 SV=3
1393	15801	Q8K4Z3	6.25	218.23	3737400	3721900	3975500	3616800	3413100	3374300	1	1	1.07	0.97	0.92	0.91	3737400	3721900	3975500	3616800	3413100	3374300	1	1	1.07	0.97	0.92	0.91	35	9	9	Carbamidomethylation; TMT10plex	30973	NAD(P)H-hydrate epimerase OS=Mus musculus OX=10090 GN=Naxe PE=1 SV=1
1105	1341	Q9CYI4	7.12	218.15	217000	241900	272780	248770	245480	276630	0.9	1	1.13	1.03	1.01	1.14	217000	241900	272780	248770	245480	276630	0.9	1	1.13	1.03	1.01	1.14	13	8	4	Carbamidomethylation; TMT10plex	43934	Putative RNA-binding protein Luc7-like 1 OS=Mus musculus OX=10090 GN=Luc7l PE=1 SV=2
1008	471	O54984	1.62	218.15	4939700	4779600	5053800	4922000	4959200	4891800	1.03	1	1.06	1.03	1.04	1.02	4939700	4779600	5053800	4922000	4959200	4891800	1.03	1	1.06	1.03	1.04	1.02	36	9	9	Carbamidomethylation; TMT10plex	38823	ATPase Asna1 OS=Mus musculus OX=10090 GN=Asna1 PE=1 SV=2
720	3478	Q8CFI7	7.72	218.08	1040400	1101200	1179000	1067900	974370	1107600	0.94	1	1.07	0.97	0.88	1.01	1040400	1101200	1179000	1067900	974370	1107600	0.94	1	1.07	0.97	0.88	1.01	19	19	19	Carbamidomethylation; TMT10plex	133910	DNA-directed RNA polymerase II subunit RPB2 OS=Mus musculus OX=10090 GN=Polr2b PE=1 SV=2
909	7262	P98063	19.13	218.05	896660	1061100	1084100	810530	873420	764590	0.85	1	1.02	0.76	0.82	0.72	896660	1061100	1084100	810530	873420	764590	0.85	1	1.02	0.76	0.82	0.72	16	14	14	Carbamidomethylation; TMT10plex	111666	Bone morphogenetic protein 1 OS=Mus musculus OX=10090 GN=Bmp1 PE=1 SV=2
1472	9191	Q8VBW6	7.78	218.01	1089800	1045200	1112000	1012900	918040	1090100	1.04	1	1.06	0.97	0.88	1.04	1089800	1045200	1112000	1012900	918040	1090100	1.04	1	1.06	0.97	0.88	1.04	15	8	8	TMT10plex	60274	NEDD8-activating enzyme E1 regulatory subunit OS=Mus musculus OX=10090 GN=Nae1 PE=1 SV=1
717	3295	Q61792	18.99	217.98	9134500	9327200	9128800	10480000	12690000	12901000	0.98	1	0.98	1.12	1.36	1.38	9134500	9327200	9128800	10480000	12690000	12901000	0.98	1	0.98	1.12	1.36	1.38	52	16	16	Carbamidomethylation; TMT10plex	29994	LIM and SH3 domain protein 1 OS=Mus musculus OX=10090 GN=Lasp1 PE=1 SV=1
1246	663	P55096	15.44	217.97	1383300	1216600	1260400	1126300	1095700	930370	1.14	1	1.04	0.93	0.9	0.76	1383300	1216600	1260400	1126300	1095700	930370	1.14	1	1.04	0.93	0.9	0.76	20	11	11	TMT10plex	75475	ATP-binding cassette sub-family D member 3 OS=Mus musculus OX=10090 GN=Abcd3 PE=1 SV=2
1036	9056	Q9Z1P6	11.17	217.88	2556100	2673800	2709000	2940400	3418700	2995100	0.96	1	1.01	1.1	1.28	1.12	2556100	2673800	2709000	2940400	3418700	2995100	0.96	1	1.01	1.1	1.28	1.12	71	10	10	Carbamidomethylation; TMT10plex	12576	NADH dehydrogenase [ubiquinone] 1 alpha subcomplex subunit 7 OS=Mus musculus OX=10090 GN=Ndufa7 PE=1 SV=3
645	4262	O08547	4.46	217.83	6923000	7022900	7175600	7926400	6851600	7374700	0.99	1	1.02	1.13	0.98	1.05	6923000	7022900	7175600	7926400	6851600	7374700	0.99	1	1.02	1.13	0.98	1.05	52	10	10	TMT10plex; Oxidation (M)	24741	Vesicle-trafficking protein SEC22b OS=Mus musculus OX=10090 GN=Sec22b PE=1 SV=3
1752	9971	P62761	8.93	217.82	1017900	1056300	1004600	966520	855290	944560	0.96	1	0.95	0.92	0.81	0.89	1017900	1056300	1004600	966520	855290	944560	0.96	1	0.95	0.92	0.81	0.89	48	8	8	Carbamidomethylation; TMT10plex	22142	Visinin-like protein 1 OS=Mus musculus OX=10090 GN=Vsnl1 PE=1 SV=2
912	8829	Q9CQE8	5.92	217.79	3907200	4000700	4001000	4573800	3706500	3796800	0.98	1	1	1.14	0.93	0.95	3907200	4000700	4001000	4573800	3706500	3796800	0.98	1	1	1.14	0.93	0.95	50	11	11	Carbamidomethylation; TMT10plex; Oxidation (M)	28152	RNA transcription translation and transport factor protein OS=Mus musculus OX=10090 GN=RTRAF PE=1 SV=1
1131	4918	O89079	8.47	217.64	2021000	1834900	2083500	2295400	1805700	1962300	1.1	1	1.14	1.25	0.98	1.07	2021000	1834900	2083500	2295400	1805700	1962300	1.1	1	1.14	1.25	0.98	1.07	39	10	10	Carbamidomethylation; TMT10plex	34567	Coatomer subunit epsilon OS=Mus musculus OX=10090 GN=Cope PE=1 SV=3
715	3389	Q80UG5	6.84	217.62	2129300	1960700	2004500	2066400	2075000	2388100	1.09	1	1.02	1.05	1.06	1.22	2129300	1960700	2004500	2066400	2075000	2388100	1.09	1	1.02	1.05	1.06	1.22	30	15	15	Carbamidomethylation; TMT10plex	65575	Septin-9 OS=Mus musculus OX=10090 GN=Septin9 PE=1 SV=1
997	9927	Q80U93	4.21	217.56	621200	591090	626770	588400	552500	651870	1.05	1	1.06	1	0.93	1.1	621200	591090	626770	588400	552500	651870	1.05	1	1.06	1	0.93	1.1	8	14	14	TMT10plex	212977	Nuclear pore complex protein Nup214 OS=Mus musculus OX=10090 GN=Nup214 PE=1 SV=2
1853	2143	Q8BP40	12.22	217.45	720540	718350	768280	713910	666560	591860	1	1	1.07	0.99	0.93	0.82	720540	718350	768280	713910	666560	591860	1	1	1.07	0.99	0.93	0.82	14	6	6	Carbamidomethylation; TMT10plex	47625	Lysophosphatidic acid phosphatase type 6 OS=Mus musculus OX=10090 GN=Acp6 PE=1 SV=1
1099	10390	O08582	5.13	217.37	2258300	2563700	2285600	2142600	2278100	2242900	0.88	1	0.89	0.84	0.89	0.87	2258300	2563700	2285600	2142600	2278100	2242900	0.88	1	0.89	0.84	0.89	0.87	22	13	13	Carbamidomethylation; TMT10plex	72301	GTP-binding protein 1 OS=Mus musculus OX=10090 GN=Gtpbp1 PE=1 SV=2
1747	6388	Q61749	30.43	217.3	217650	217190	174610	176050	137100	183800	1	1	0.8	0.81	0.63	0.85	217650	217190	174610	176050	137100	183800	1	1	0.8	0.81	0.63	0.85	24	9	9	Carbamidomethylation; TMT10plex	57624	Translation initiation factor eIF-2B subunit delta OS=Mus musculus OX=10090 GN=Eif2b4 PE=1 SV=2
877	1173	O35381	21.41	217.26	10049000	9002600	10430000	10545000	11653000	15058000	1.12	1	1.16	1.17	1.29	1.67	10049000	9002600	10430000	10545000	11653000	15058000	1.12	1	1.16	1.17	1.29	1.67	27	11	7	Carbamidomethylation; TMT10plex	28538	Acidic leucine-rich nuclear phosphoprotein 32 family member A OS=Mus musculus OX=10090 GN=Anp32a PE=1 SV=1
240	2012	P30681	22.93	217.21	16373000	15322000	18141000	19273000	22593000	21991000	1.07	1	1.18	1.26	1.47	1.44	16373000	15322000	18141000	19273000	22593000	21991000	1.07	1	1.18	1.26	1.47	1.44	44	13	10	Carbamidomethylation; TMT10plex; Oxidation (M)	24162	High mobility group protein B2 OS=Mus musculus OX=10090 GN=Hmgb2 PE=1 SV=3
681	1905	P43275	15.23	217.09	2841900	3033100	3584600	3516600	3165800	2653100	0.94	1	1.18	1.16	1.04	0.87	2841900	3033100	3584600	3516600	3165800	2653100	0.94	1	1.18	1.16	1.04	0.87	25	9	6	TMT10plex	21785	Histone H1.1 OS=Mus musculus OX=10090 GN=H1-1 PE=1 SV=2
977	2373	P18653	9.43	217.05	242320	255200	272470	259370	249280	208850	0.95	1	1.07	1.02	0.98	0.82	242320	255200	272470	259370	249280	208850	0.95	1	1.07	1.02	0.98	0.82	11	14	5	Carbamidomethylation; TMT10plex	81595	Ribosomal protein S6 kinase alpha-1 OS=Mus musculus OX=10090 GN=Rps6ka1 PE=1 SV=1
1464	3740	Q99LE6	44.54	217.04	1831100	2048000	1618300	1855800	2871800	1693000	0.89	1	0.79	0.91	1.4	0.83	1831100	2048000	1618300	1855800	2871800	1693000	0.89	1	0.79	0.91	1.4	0.83	19	10	10	Carbamidomethylation; TMT10plex	71782	ATP-binding cassette sub-family F member 2 OS=Mus musculus OX=10090 GN=Abcf2 PE=1 SV=1
1252	3246	Q99L45	5.92	216.95	2700600	2996900	2712800	2678200	2919200	3176100	0.9	1	0.91	0.89	0.97	1.06	2700600	2996900	2712800	2678200	2919200	3176100	0.9	1	0.91	0.89	0.97	1.06	34	9	9	Carbamidomethylation; TMT10plex	38092	Eukaryotic translation initiation factor 2 subunit 2 OS=Mus musculus OX=10090 GN=Eif2s2 PE=1 SV=1
963	1940	P70336	12.86	216.77	781020	763170	799290	664690	722250	610320	1.02	1	1.05	0.87	0.95	0.8	781020	763170	799290	664690	722250	610320	1.02	1	1.05	0.87	0.95	0.8	12	15	14	Carbamidomethylation; TMT10plex	160585	Rho-associated protein kinase 2 OS=Mus musculus OX=10090 GN=Rock2 PE=1 SV=1
1346	9622	F8VPU2	3.55	216.68	955580	916200	851280	906290	869430	947240	1.04	1	0.93	0.99	0.95	1.03	955580	916200	851280	906290	869430	947240	1.04	1	0.93	0.99	0.95	1.03	13	11	11	TMT10plex	118875	FERM ARHGEF and pleckstrin domain-containing protein 1 OS=Mus musculus OX=10090 GN=Farp1 PE=1 SV=1
575	4763	Q9CQQ7	5.77	216.63	17673000	17694000	16174000	16212000	15160000	16335000	1	1	0.91	0.92	0.86	0.92	17673000	17694000	16174000	16212000	15160000	16335000	1	1	0.91	0.92	0.86	0.92	39	13	13	TMT10plex; Oxidation (M)	28949	ATP synthase F(0) complex subunit B1 mitochondrial OS=Mus musculus OX=10090 GN=Atp5pb PE=1 SV=1
1385	2237	P10518	15.21	216.61	809660	641690	899970	811770	666280	855750	1.26	1	1.4	1.27	1.04	1.33	809660	641690	899970	811770	666280	855750	1.26	1	1.4	1.27	1.04	1.33	28	8	8	Carbamidomethylation; TMT10plex	36024	Delta-aminolevulinic acid dehydratase OS=Mus musculus OX=10090 GN=Alad PE=1 SV=1
685	81	Q99JY0	2.51	216.48	12288000	12430000	13084000	11895000	12112000	12665000	0.99	1	1.05	0.96	0.97	1.02	12288000	12430000	13084000	11895000	12112000	12665000	0.99	1	1.05	0.96	0.97	1.02	31	17	17	TMT10plex	51386	Trifunctional enzyme subunit beta mitochondrial OS=Mus musculus OX=10090 GN=Hadhb PE=1 SV=1
2046	1862	Q8BHS6	43.38	216.42	392580	404910	431000	402800	244970	416740	0.97	1	1.06	0.99	0.6	1.03	392580	404910	431000	402800	244970	416740	0.97	1	1.06	0.99	0.6	1.03	29	8	8	Carbamidomethylation; TMT10plex	42620	Armadillo repeat-containing X-linked protein 3 OS=Mus musculus OX=10090 GN=Armcx3 PE=1 SV=1
660	5405	Q8VI75	2.21	216.41	2986000	3186600	3115200	2897800	3140800	3168700	0.94	1	0.98	0.91	0.99	0.99	2986000	3186600	3115200	2897800	3140800	3168700	0.94	1	0.98	0.91	0.99	0.99	18	19	19	Carbamidomethylation; TMT10plex	119275	Importin-4 OS=Mus musculus OX=10090 GN=Ipo4 PE=1 SV=1
811	125	Q6PHN9	7.07	216.4	1629600	1568400	1709000	1597200	1440600	1428600	1.04	1	1.09	1.02	0.92	0.91	1629600	1568400	1709000	1597200	1440600	1428600	1.04	1	1.09	1.02	0.92	0.91	38	10	7	Carbamidomethylation; TMT10plex	23025	Ras-related protein Rab-35 OS=Mus musculus OX=10090 GN=Rab35 PE=1 SV=1
1233	15827	Q9WUR2	21.08	216.3	873420	865540	944870	914120	653340	830880	1.01	1	1.09	1.06	0.75	0.96	873420	865540	944870	914120	653340	830880	1.01	1	1.09	1.06	0.75	0.96	27	9	9	Carbamidomethylation; TMT10plex	43268	Enoyl-CoA delta isomerase 2 mitochondrial OS=Mus musculus OX=10090 GN=Eci2 PE=1 SV=2
2103	7342	Q9CR00	18.68	216.26	890830	795890	894170	1088600	1120800	1205800	1.12	1	1.12	1.37	1.41	1.52	890830	795890	894170	1088600	1120800	1205800	1.12	1	1.12	1.37	1.41	1.52	32	6	6	Carbamidomethylation; TMT10plex	24720	26S proteasome non-ATPase regulatory subunit 9 OS=Mus musculus OX=10090 GN=Psmd9 PE=1 SV=1
1256	3105	Q6PFD9	14.8	216.25	880880	899400	726300	833420	975980	809070	0.98	1	0.81	0.93	1.09	0.9	880880	899400	726300	833420	975980	809070	0.98	1	0.81	0.93	1.09	0.9	9	13	13	Carbamidomethylation; TMT10plex	197239	Nuclear pore complex protein Nup98-Nup96 OS=Mus musculus OX=10090 GN=Nup98 PE=1 SV=2
1043	391	Q9QYX7	7.98	216.23	511440	496030	537760	498490	438060	508480	1.03	1	1.08	1	0.88	1.03	511440	496030	537760	498490	438060	508480	1.03	1	1.08	1	0.88	1.03	4	15	15	Carbamidomethylation; TMT10plex	550842	Protein piccolo OS=Mus musculus OX=10090 GN=Pclo PE=1 SV=4
716	1086	Q8VDP4	2.99	216.19	4452200	4538000	4442100	4653500	4186400	4029700	0.98	1	0.98	1.03	0.92	0.89	4452200	4538000	4442100	4653500	4186400	4029700	0.98	1	0.98	1.03	0.92	0.89	20	17	17	Carbamidomethylation; TMT10plex	103002	Cell cycle and apoptosis regulator protein 2 OS=Mus musculus OX=10090 GN=Ccar2 PE=1 SV=2
1015	14801	Q9DAR7	2.27	216	2563700	2486400	2462900	2687800	2435000	2315200	1.03	1	0.99	1.08	0.98	0.93	2563700	2486400	2462900	2687800	2435000	2315200	1.03	1	0.99	1.08	0.98	0.93	52	13	13	Carbamidomethylation; TMT10plex	38988	m7GpppX diphosphatase OS=Mus musculus OX=10090 GN=Dcps PE=1 SV=1
1122	15740	Q9WTP7	2.2	215.76	2003800	1949800	2031500	2080000	1903200	1889800	1.03	1	1.04	1.07	0.98	0.97	2003800	1949800	2031500	2080000	1903200	1889800	1.03	1	1.04	1.07	0.98	0.97	51	10	10	Carbamidomethylation; TMT10plex	25426	GTP:AMP phosphotransferase AK3 mitochondrial OS=Mus musculus OX=10090 GN=Ak3 PE=1 SV=3
1588	15781	P47199	3.66	215.74	1509600	1565200	1400300	1361400	1522300	1351400	0.96	1	0.89	0.87	0.97	0.86	1509600	1565200	1400300	1361400	1522300	1351400	0.96	1	0.89	0.87	0.97	0.86	38	10	10	Carbamidomethylation; TMT10plex	35269	Quinone oxidoreductase OS=Mus musculus OX=10090 GN=Cryz PE=1 SV=1
1667	14300	P50136	13.05	215.65	442120	426440	477970	434410	364020	418070	1.04	1	1.12	1.02	0.85	0.98	442120	426440	477970	434410	364020	418070	1.04	1	1.12	1.02	0.85	0.98	26	8	8	TMT10plex	50371	2-oxoisovalerate dehydrogenase subunit alpha mitochondrial OS=Mus musculus OX=10090 GN=Bckdha PE=1 SV=1
1075	10489	Q9DC51	200	215.6	54254	115950	107850	74925	123110	19187	0.47	1	0.93	0.65	1.06	0.17	54254	115950	107850	74925	123110	19187	0.47	1	0.93	0.65	1.06	0.17	15	9	4	Carbamidomethylation; TMT10plex	40538	Guanine nucleotide-binding protein G(i) subunit alpha OS=Mus musculus OX=10090 GN=Gnai3 PE=1 SV=3
1199	3257	P38060	27.04	215.31	1477700	1732900	1600600	1420600	1128500	1458100	0.85	1	0.92	0.82	0.65	0.84	1477700	1732900	1600600	1420600	1128500	1458100	0.85	1	0.92	0.82	0.65	0.84	34	12	12	Carbamidomethylation; TMT10plex	34239	Hydroxymethylglutaryl-CoA lyase mitochondrial OS=Mus musculus OX=10090 GN=Hmgcl PE=1 SV=2
1025	7296	Q64105	4.23	215.27	4740100	4326100	4632300	4149900	4111800	4267600	1.1	1	1.07	0.96	0.95	0.99	4740100	4326100	4632300	4149900	4111800	4267600	1.1	1	1.07	0.96	0.95	0.99	56	12	12	Carbamidomethylation; TMT10plex	27883	Sepiapterin reductase OS=Mus musculus OX=10090 GN=Spr PE=1 SV=1
928	1534	P62806	10.95	215.26	7471600	7300000	8537900	7346500	6917900	6699800	1.02	1	1.17	1.01	0.95	0.92	7471600	7300000	8537900	7346500	6917900	6699800	1.02	1	1.17	1.01	0.95	0.92	60	9	9	TMT10plex; Oxidation (M)	11367	Histone H4 OS=Mus musculus OX=10090 GN=H4c1 PE=1 SV=2
1492	15744	Q99M87	5.48	215.18	879320	1049500	920470	888310	933310	793080	0.84	1	0.88	0.85	0.89	0.76	879320	1049500	920470	888310	933310	793080	0.84	1	0.88	0.85	0.89	0.76	26	11	11	Carbamidomethylation; TMT10plex	52444	DnaJ homolog subfamily A member 3 mitochondrial OS=Mus musculus OX=10090 GN=Dnaja3 PE=1 SV=1
409	259	Q9CR16	4.39	215.15	6008700	6876200	6016400	5841800	6493600	5778400	0.87	1	0.87	0.85	0.94	0.84	6008700	6876200	6016400	5841800	6493600	5778400	0.87	1	0.87	0.85	0.94	0.84	42	17	16	Carbamidomethylation; TMT10plex	40743	Peptidyl-prolyl cis-trans isomerase D OS=Mus musculus OX=10090 GN=Ppid PE=1 SV=3
1054	5867	P08775	3.29	215.15	573160	596750	608940	597410	550630	556010	0.96	1	1.02	1	0.92	0.93	573160	596750	608940	597410	550630	556010	0.96	1	1.02	1	0.92	0.93	7	12	12	Carbamidomethylation; TMT10plex	217174	DNA-directed RNA polymerase II subunit RPB1 OS=Mus musculus OX=10090 GN=Polr2a PE=1 SV=3
2193	15956	Q99JT2	11.52	215.13	0	0	0	1900	0	0	-	-	-	256	-	-	0	0	0	1900	0	0	-	-	-	256	-	-	4	6	1	Carbamidomethylation; TMT10plex	46614	Serine/threonine-protein kinase 26 OS=Mus musculus OX=10090 GN=Stk26 PE=1 SV=1
1564	3153	P23198	31.4	215.1	1618600	1100800	1547100	1543000	1758800	1793600	1.47	1	1.41	1.4	1.6	1.63	1618600	1100800	1547100	1543000	1758800	1793600	1.47	1	1.41	1.4	1.6	1.63	27	6	5	Carbamidomethylation; TMT10plex	20855	Chromobox protein homolog 3 OS=Mus musculus OX=10090 GN=Cbx3 PE=1 SV=2
1371	15725	Q9R099	5.06	215.07	720280	707250	665970	782510	726450	766270	1.02	1	0.94	1.11	1.03	1.08	720280	707250	665970	782510	726450	766270	1.02	1	0.94	1.11	1.03	1.08	29	11	11	Carbamidomethylation; TMT10plex	49584	Transducin beta-like protein 2 OS=Mus musculus OX=10090 GN=Tbl2 PE=1 SV=2
1924	8840	Q8BH97	35.54	214.96	3664400	3248500	3735800	3884200	5376300	4119900	1.13	1	1.15	1.2	1.65	1.27	3664400	3248500	3735800	3884200	5376300	4119900	1.13	1	1.15	1.2	1.65	1.27	30	8	8	TMT10plex	38002	Reticulocalbin-3 OS=Mus musculus OX=10090 GN=Rcn3 PE=1 SV=1
1234	2018	Q6PAJ1	16.2	214.95	543670	426680	595200	529820	434010	437240	1.27	1	1.39	1.24	1.02	1.02	543670	426680	595200	529820	434010	437240	1.27	1	1.39	1.24	1.02	1.02	10	13	11	Carbamidomethylation; TMT10plex	143071	Breakpoint cluster region protein OS=Mus musculus OX=10090 GN=Bcr PE=1 SV=3
1209	4406	Q60605	30.98	214.92	4752400	3503000	4700000	4781000	5465700	7188400	1.36	1	1.34	1.36	1.56	2.05	4752400	3503000	4700000	4781000	5465700	7188400	1.36	1	1.34	1.36	1.56	2.05	52	9	8	Carbamidomethylation; TMT10plex; Acetylation (Protein N-term)	16930	Myosin light polypeptide 6 OS=Mus musculus OX=10090 GN=Myl6 PE=1 SV=3
2139	3271	P62915	12.25	214.79	389410	526080	422540	422010	405140	435710	0.74	1	0.8	0.8	0.77	0.83	389410	526080	422540	422010	405140	435710	0.74	1	0.8	0.8	0.77	0.83	31	7	7	Carbamidomethylation; TMT10plex	34819	Transcription initiation factor IIB OS=Mus musculus OX=10090 GN=Gtf2b PE=1 SV=1
2141	15883	Q99KH8	1.71	214.78	66601	66116	72004	66865	59918	61626	1.01	1	1.09	1.01	0.91	0.93	66601	66116	72004	66865	59918	61626	1.01	1	1.09	1.01	0.91	0.93	5	7	2	Carbamidomethylation; TMT10plex	47954	Serine/threonine-protein kinase 24 OS=Mus musculus OX=10090 GN=Stk24 PE=1 SV=1
713	148	Q6P5D8	2.15	214.74	2004700	2057800	1981100	1986400	2122700	1847500	0.97	1	0.96	0.97	1.03	0.9	2004700	2057800	1981100	1986400	2122700	1847500	0.97	1	0.96	0.97	1.03	0.9	11	20	20	Carbamidomethylation; TMT10plex	225646	Structural maintenance of chromosomes flexible hinge domain-containing protein 1 OS=Mus musculus OX=10090 GN=Smchd1 PE=1 SV=2
946	9227	P54822	3.3	214.7	1266900	1358100	1220500	1387300	1247600	1292300	0.93	1	0.9	1.02	0.92	0.95	1266900	1358100	1220500	1387300	1247600	1292300	0.93	1	0.9	1.02	0.92	0.95	33	12	12	Carbamidomethylation; TMT10plex	54866	Adenylosuccinate lyase OS=Mus musculus OX=10090 GN=Adsl PE=1 SV=2
581	5332	P62918	3.83	214.66	18903000	19835000	21170000	20744000	18999000	20983000	0.95	1	1.07	1.05	0.96	1.06	18903000	19835000	21170000	20744000	18999000	20983000	0.95	1	1.07	1.05	0.96	1.06	39	12	12	Carbamidomethylation; TMT10plex	28025	60S ribosomal protein L8 OS=Mus musculus OX=10090 GN=Rpl8 PE=1 SV=2
1307	15836	Q8R5M8	3	214.62	1768400	1737700	1731700	1893200	1789700	1901400	1.02	1	1	1.09	1.03	1.09	1768400	1737700	1731700	1893200	1789700	1901400	1.02	1	1	1.09	1.03	1.09	33	9	9	Carbamidomethylation; TMT10plex	49789	Cell adhesion molecule 1 OS=Mus musculus OX=10090 GN=Cadm1 PE=1 SV=2
1066	3905	Q6A0A9	7.25	214.55	942430	921540	961210	762070	834260	817180	1.02	1	1.04	0.83	0.91	0.89	942430	921540	961210	762070	834260	817180	1.02	1	1.04	0.83	0.91	0.89	13	12	11	Carbamidomethylation; TMT10plex	121646	Constitutive coactivator of PPAR-gamma-like protein 1 OS=Mus musculus OX=10090 GN=FAM120A PE=1 SV=2
1571	4432	O70378	10.03	214.49	996090	1221800	999020	950820	1060800	1146300	0.82	1	0.82	0.78	0.87	0.94	996090	1221800	999020	950820	1060800	1146300	0.82	1	0.82	0.78	0.87	0.94	59	9	9	Carbamidomethylation; TMT10plex	23348	ER membrane protein complex subunit 8 OS=Mus musculus OX=10090 GN=Emc8 PE=1 SV=1
1070	1435	P21995	9.59	214.42	7935400	7305700	8923100	7328400	7284400	7148600	1.09	1	1.22	1	1	0.98	7935400	7305700	8923100	7328400	7284400	7148600	1.09	1	1.22	1	1	0.98	26	10	9	Carbamidomethylation; TMT10plex	37064	Embigin OS=Mus musculus OX=10090 GN=Emb PE=1 SV=2
1483	1069	Q6NV83	2.52	214.42	578950	592590	604930	586870	571260	557850	0.98	1	1.02	0.99	0.96	0.94	578950	592590	604930	586870	571260	557850	0.98	1	1.02	0.99	0.96	0.94	11	10	10	Carbamidomethylation; TMT10plex	118261	U2 snRNP-associated SURP motif-containing protein OS=Mus musculus OX=10090 GN=U2surp PE=1 SV=3
1375	7677	Q9D281	9.43	214.28	561340	591120	576910	529890	718220	575850	0.95	1	0.98	0.9	1.22	0.97	561340	591120	576910	529890	718220	575850	0.95	1	0.98	0.9	1.22	0.97	22	9	9	Carbamidomethylation; TMT10plex	61013	Protein Noxp20 OS=Mus musculus OX=10090 GN=Fam114a1 PE=1 SV=1
1802	13621	Q9CSU0	5.46	214.05	1654300	1535500	1671500	1419000	1560300	1595400	1.08	1	1.09	0.92	1.02	1.04	1654300	1535500	1671500	1419000	1560300	1595400	1.08	1	1.09	0.92	1.02	1.04	26	8	8	Carbamidomethylation; TMT10plex	36884	Regulation of nuclear pre-mRNA domain-containing protein 1B OS=Mus musculus OX=10090 GN=Rprd1b PE=1 SV=2
1423	10982	O88543	6.86	213.98	1206300	1271400	1254000	1084400	1066800	1218400	0.95	1	0.99	0.85	0.84	0.96	1206300	1271400	1254000	1084400	1066800	1218400	0.95	1	0.99	0.85	0.84	0.96	33	9	9	Carbamidomethylation; TMT10plex; Oxidation (M)	47832	COP9 signalosome complex subunit 3 OS=Mus musculus OX=10090 GN=Cops3 PE=1 SV=3
770	2929	Q3URU2	4.94	213.95	1349900	1530000	1546100	1448400	1681300	1706700	0.88	1	1.01	0.95	1.1	1.12	1349900	1530000	1546100	1448400	1681300	1706700	0.88	1	1.01	0.95	1.1	1.12	15	18	18	Carbamidomethylation; TMT10plex	178931	Paternally-expressed gene 3 protein OS=Mus musculus OX=10090 GN=Peg3 PE=1 SV=1
1700	15911	Q8BTZ7	3.72	213.77	1003500	978030	879850	894780	937090	884300	1.03	1	0.9	0.91	0.96	0.9	1003500	978030	879850	894780	937090	884300	1.03	1	0.9	0.91	0.96	0.9	28	10	10	Carbamidomethylation; TMT10plex	39917	Mannose-1-phosphate guanyltransferase beta OS=Mus musculus OX=10090 GN=Gmppb PE=1 SV=1
599	6711	Q9DB20	11.99	213.74	38681000	40749000	40581000	35104000	31495000	33046000	0.95	1	1	0.86	0.77	0.81	38681000	40749000	40581000	35104000	31495000	33046000	0.95	1	1	0.86	0.77	0.81	53	12	12	Carbamidomethylation; TMT10plex; Oxidation (M)	23364	ATP synthase subunit O mitochondrial OS=Mus musculus OX=10090 GN=Atp5po PE=1 SV=1
1155	7459	Q8R550	17.24	213.73	1234800	1175900	1245700	1419300	1628300	1707700	1.05	1	1.06	1.21	1.38	1.45	1234800	1175900	1245700	1419300	1628300	1707700	1.05	1	1.06	1.21	1.38	1.45	19	12	12	TMT10plex	78170	SH3 domain-containing kinase-binding protein 1 OS=Mus musculus OX=10090 GN=Sh3kbp1 PE=1 SV=1
1055	2563	O70133	3.13	213.72	2173300	2342300	2125200	2072700	2235700	2137700	0.93	1	0.91	0.88	0.95	0.91	2173300	2342300	2125200	2072700	2235700	2137700	0.93	1	0.91	0.88	0.95	0.91	13	15	15	Carbamidomethylation; TMT10plex	149474	ATP-dependent RNA helicase A OS=Mus musculus OX=10090 GN=Dhx9 PE=1 SV=2
1876	15907	P97470	3.5	213.51	1000900	1063100	968990	979270	956540	981020	0.94	1	0.91	0.92	0.9	0.92	1000900	1063100	968990	979270	956540	981020	0.94	1	0.91	0.92	0.9	0.92	26	8	6	Carbamidomethylation; TMT10plex	35080	Serine/threonine-protein phosphatase 4 catalytic subunit OS=Mus musculus OX=10090 GN=Ppp4c PE=1 SV=2
1186	5219	Q61510	5.3	213.43	608980	604660	565550	596100	678510	541700	1.01	1	0.94	0.99	1.12	0.9	608980	604660	565550	596100	678510	541700	1.01	1	0.94	0.99	1.12	0.9	22	12	12	Carbamidomethylation; TMT10plex	71726	E3 ubiquitin/ISG15 ligase TRIM25 OS=Mus musculus OX=10090 GN=Trim25 PE=1 SV=2
1376	573	Q9R0I7	36.52	213.34	1924600	2018800	1931100	2148300	3221700	1868200	0.95	1	0.96	1.06	1.6	0.93	1924600	2018800	1931100	2148300	3221700	1868200	0.95	1	0.96	1.06	1.6	0.93	10	12	12	TMT10plex	155129	YLP motif-containing protein 1 OS=Mus musculus OX=10090 GN=Ylpm1 PE=2 SV=2
1759	15767	Q9JI11	11.99	213.24	254730	262450	297060	284580	217010	245850	0.97	1	1.13	1.08	0.83	0.94	254730	262450	297060	284580	217010	245850	0.97	1	1.13	1.08	0.83	0.94	9	8	4	TMT10plex	55541	Serine/threonine-protein kinase 4 OS=Mus musculus OX=10090 GN=Stk4 PE=1 SV=1
1262	2693	Q80VL1	8.75	213.22	1303900	1153300	1289300	1180500	1047000	1074100	1.13	1	1.12	1.02	0.91	0.93	1303900	1153300	1289300	1180500	1047000	1074100	1.13	1	1.12	1.02	0.91	0.93	24	11	11	Carbamidomethylation; TMT10plex	62134	Tudor and KH domain-containing protein OS=Mus musculus OX=10090 GN=Tdrkh PE=1 SV=1
1265	14825	Q8CFX1	6.26	213.21	1907700	2034700	2088900	1786500	1795500	1772600	0.94	1	1.03	0.88	0.88	0.87	1907700	2034700	2088900	1786500	1795500	1772600	0.94	1	1.03	0.88	0.88	0.87	15	11	11	TMT10plex	88928	GDH/6PGL endoplasmic bifunctional protein OS=Mus musculus OX=10090 GN=H6pd PE=1 SV=2
1045	2291	Q61464	24.82	213.17	648080	773030	600100	675080	514350	503260	0.84	1	0.78	0.87	0.67	0.65	648080	773030	600100	675080	514350	503260	0.84	1	0.78	0.87	0.67	0.65	9	14	14	Carbamidomethylation; TMT10plex	218132	Zinc finger protein 638 OS=Mus musculus OX=10090 GN=Znf638 PE=1 SV=2
1543	15804	Q9CYH2	11.71	213.03	882840	998650	854890	1009900	1101700	980790	0.88	1	0.86	1.01	1.1	0.98	882840	998650	854890	1009900	1101700	980790	0.88	1	0.86	1.01	1.1	0.98	39	10	10	Carbamidomethylation; TMT10plex	24395	Peroxiredoxin-like 2A OS=Mus musculus OX=10090 GN=Prxl2a PE=1 SV=2
1382	4561	Q9EPU4	1.21	212.97	776490	765400	737030	740020	741970	712700	1.01	1	0.96	0.97	0.97	0.93	776490	765400	737030	740020	741970	712700	1.01	1	0.96	0.97	0.97	0.93	9	12	12	TMT10plex	160818	Cleavage and polyadenylation specificity factor subunit 1 OS=Mus musculus OX=10090 GN=Cpsf1 PE=1 SV=1
1422	15779	Q9Z1Q5	6.96	212.91	881330	790270	790410	718780	707690	662030	1.12	1	1	0.91	0.9	0.84	881330	790270	790410	718780	707690	662030	1.12	1	1	0.91	0.9	0.84	49	9	9	Carbamidomethylation; TMT10plex	27013	Chloride intracellular channel protein 1 OS=Mus musculus OX=10090 GN=Clic1 PE=1 SV=3
1662	15743	O70309	3.77	212.85	170710	163530	146950	156910	149450	140760	1.04	1	0.9	0.96	0.91	0.86	170710	163530	146950	156910	149450	140760	1.04	1	0.9	0.96	0.91	0.86	17	10	10	Carbamidomethylation; TMT10plex	87909	Integrin beta-5 OS=Mus musculus OX=10090 GN=Itgb5 PE=1 SV=2
1173	8107	O88952	10.25	212.82	507000	528550	578580	676440	593090	577440	0.96	1	1.09	1.28	1.12	1.09	507000	528550	578580	676440	593090	577440	0.96	1	1.09	1.28	1.12	1.09	43	10	8	Carbamidomethylation; TMT10plex	21834	Protein lin-7 homolog C OS=Mus musculus OX=10090 GN=Lin7c PE=1 SV=2
585	1410	Q9CZX8	1.99	212.65	8524200	8472700	8189600	8762600	7930600	8144800	1.01	1	0.97	1.03	0.94	0.96	8524200	8472700	8189600	8762600	7930600	8144800	1.01	1	0.97	1.03	0.94	0.96	58	13	13	TMT10plex	16085	40S ribosomal protein S19 OS=Mus musculus OX=10090 GN=Rps19 PE=1 SV=3
1604	2384	A2AF47	11.1	212.55	403340	369660	348340	336140	289430	306060	1.09	1	0.94	0.91	0.78	0.83	403340	369660	348340	336140	289430	306060	1.09	1	0.94	0.91	0.78	0.83	6	10	9	Carbamidomethylation; TMT10plex	237769	Dedicator of cytokinesis protein 11 OS=Mus musculus OX=10090 GN=Dock11 PE=1 SV=1
1077	2139	Q9CR57	16.52	212.52	5951600	5476000	6228200	5917500	4536600	5837600	1.09	1	1.14	1.08	0.83	1.07	5951600	5476000	6228200	5917500	4536600	5837600	1.09	1	1.14	1.08	0.83	1.07	40	9	9	Carbamidomethylation; TMT10plex; Oxidation (M)	23564	60S ribosomal protein L14 OS=Mus musculus OX=10090 GN=Rpl14 PE=1 SV=3
1392	425	Q80X41	8.14	212.49	1694700	1628600	1674300	2070100	1485900	1681300	1.04	1	1.03	1.27	0.91	1.03	1694700	1628600	1674300	2070100	1485900	1681300	1.04	1	1.03	1.27	0.91	1.03	22	9	9	TMT10plex	49741	Serine/threonine-protein kinase VRK1 OS=Mus musculus OX=10090 GN=Vrk1 PE=1 SV=2
1208	15825	Q9DC16	3.96	212.42	1423000	1386400	1434100	1499600	1557400	1404200	1.03	1	1.03	1.08	1.12	1.01	1423000	1386400	1434100	1499600	1557400	1404200	1.03	1	1.03	1.08	1.12	1.01	32	8	8	TMT10plex	32562	Endoplasmic reticulum-Golgi intermediate compartment protein 1 OS=Mus musculus OX=10090 GN=Ergic1 PE=1 SV=1
950	15927	Q8BSL7	2.02	212.42	96309	84045	119190	91077	61423	69911	1.15	1	1.42	1.08	0.73	0.83	96309	84045	119190	91077	61423	69911	1.15	1	1.42	1.08	0.73	0.83	6	9	1	TMT10plex	20746	ADP-ribosylation factor 2 OS=Mus musculus OX=10090 GN=Arf2 PE=1 SV=2
1223	15701	A2BH40	8.76	212.42	520570	477580	463930	387160	434050	519640	1.09	1	0.97	0.81	0.91	1.09	520570	477580	463930	387160	434050	519640	1.09	1	0.97	0.81	0.91	1.09	7	11	10	TMT10plex	242089	AT-rich interactive domain-containing protein 1A OS=Mus musculus OX=10090 GN=Arid1a PE=1 SV=1
914	1558	Q8BSY0	10.06	212.3	593000	576370	642290	634770	549660	510800	1.03	1	1.11	1.1	0.95	0.89	593000	576370	642290	634770	549660	510800	1.03	1	1.11	1.1	0.95	0.89	20	12	12	Carbamidomethylation; TMT10plex	83042	Aspartyl/asparaginyl beta-hydroxylase OS=Mus musculus OX=10090 GN=Asph PE=1 SV=1
918	7508	Q8CJG0	16.45	212.28	719120	714840	865780	762230	670580	631180	1.01	1	1.21	1.07	0.94	0.88	719120	714840	865780	762230	670580	631180	1.01	1	1.21	1.07	0.94	0.88	17	16	11	Carbamidomethylation; TMT10plex	97304	Protein argonaute-2 OS=Mus musculus OX=10090 GN=Ago2 PE=1 SV=3
940	1152	Q62376	5.21	212.19	5342000	5527200	5454300	5726500	6316400	5960400	0.97	1	0.99	1.04	1.14	1.08	5342000	5527200	5454300	5726500	6316400	5960400	0.97	1	0.99	1.04	1.14	1.08	22	12	12	TMT10plex	51992	U1 small nuclear ribonucleoprotein 70 kDa OS=Mus musculus OX=10090 GN=Snrnp70 PE=1 SV=2
1443	15739	Q9JHK4	33.56	212.17	545640	495560	562530	678460	806690	618830	1.1	1	1.14	1.37	1.63	1.25	545640	495560	562530	678460	806690	618830	1.1	1	1.14	1.37	1.63	1.25	22	11	11	Carbamidomethylation; TMT10plex	64990	Geranylgeranyl transferase type-2 subunit alpha OS=Mus musculus OX=10090 GN=Rabggta PE=1 SV=1
1654	2390	Q3TCJ1	26.03	212.08	109550	81662	78700	59290	53695	92274	1.34	1	0.96	0.73	0.66	1.13	109550	81662	78700	59290	53695	92274	1.34	1	0.96	0.73	0.66	1.13	18	6	6	Carbamidomethylation; TMT10plex	46943	BRISC complex subunit Abraxas 2 OS=Mus musculus OX=10090 GN=Abraxas2 PE=1 SV=1
1844	5695	Q8R0A7	10.55	212.07	585340	540690	578690	486330	456830	487480	1.08	1	1.07	0.9	0.84	0.9	585340	540690	578690	486330	456830	487480	1.08	1	1.07	0.9	0.84	0.9	24	9	9	Carbamidomethylation; TMT10plex	46318	Uncharacterized protein KIAA0513 OS=Mus musculus OX=10090 GN=Kiaa0513 PE=1 SV=1
804	1944	P51859	58.06	212.04	2020600	1976700	2283100	2430700	3846800	2950000	1.02	1	1.16	1.23	1.95	1.49	2020600	1976700	2283100	2430700	3846800	2950000	1.02	1	1.16	1.23	1.95	1.49	36	13	11	Carbamidomethylation; TMT10plex	26269	Hepatoma-derived growth factor OS=Mus musculus OX=10090 GN=Hdgf PE=1 SV=2
865	15831	P61089	1.79	211.96	9255300	9287600	9320800	9630500	9831100	8999900	1	1	1	1.04	1.06	0.97	9255300	9287600	9320800	9630500	9831100	8999900	1	1	1	1.04	1.06	0.97	64	11	11	Carbamidomethylation; TMT10plex; Oxidation (M)	17138	Ubiquitin-conjugating enzyme E2 N OS=Mus musculus OX=10090 GN=Ube2n PE=1 SV=1
1119	15497	Q6PGH2	29.15	211.94	1734300	1843500	1643900	1874200	2574300	2308800	0.94	1	0.89	1.02	1.4	1.25	1734300	1843500	1643900	1874200	2574300	2308800	0.94	1	0.89	1.02	1.4	1.25	41	8	8	Carbamidomethylation; TMT10plex	20020	Jupiter microtubule associated homolog 2 OS=Mus musculus OX=10090 GN=Jpt2 PE=1 SV=1
1552	4101	O08579	8.02	211.92	2980300	2998900	3140200	3060400	2581500	3200700	0.99	1	1.05	1.02	0.86	1.07	2980300	2998900	3140200	3060400	2581500	3200700	0.99	1	1.05	1.02	0.86	1.07	27	7	7	TMT10plex; Oxidation (M)	29436	Emerin OS=Mus musculus OX=10090 GN=Emd PE=1 SV=1
1870	7222	Q9CQD1	11.19	211.92	130240	140870	95964	112870	116720	105530	0.92	1	0.68	0.8	0.83	0.75	130240	140870	95964	112870	116720	105530	0.92	1	0.68	0.8	0.83	0.75	27	7	4	TMT10plex	23599	Ras-related protein Rab-5A OS=Mus musculus OX=10090 GN=Rab5a PE=1 SV=1
405	166	Q64433	28.96	211.79	25998000	21716000	26355000	29814000	33949000	35955000	1.2	1	1.21	1.37	1.56	1.66	25998000	21716000	26355000	29814000	33949000	35955000	1.2	1	1.21	1.37	1.56	1.66	79	10	10	TMT10plex; Oxidation (M)	10963	10 kDa heat shock protein mitochondrial OS=Mus musculus OX=10090 GN=Hspe1 PE=1 SV=2
1026	12983	Q06890	2	211.76	1427000	1372000	1482500	1502500	1435300	1506800	1.04	1	1.08	1.1	1.05	1.1	1427000	1372000	1482500	1502500	1435300	1506800	1.04	1	1.08	1.1	1.05	1.1	33	15	15	Carbamidomethylation; TMT10plex	51656	Clusterin OS=Mus musculus OX=10090 GN=Clu PE=1 SV=1
1447	15858	Q9D358	5.67	211.75	1893800	1872100	1994500	1673800	1729000	1955300	1.01	1	1.07	0.89	0.92	1.04	1893800	1872100	1994500	1673800	1729000	1955300	1.01	1	1.07	0.89	0.92	1.04	69	9	9	Carbamidomethylation; TMT10plex	18192	Low molecular weight phosphotyrosine protein phosphatase OS=Mus musculus OX=10090 GN=Acp1 PE=1 SV=3
1742	3704	P52760	19.03	211.71	1369400	1110300	1579800	1123400	1117400	1163000	1.23	1	1.42	1.01	1.01	1.05	1369400	1110300	1579800	1123400	1117400	1163000	1.23	1	1.42	1.01	1.01	1.05	58	7	7	Carbamidomethylation; TMT10plex; Oxidation (M)	14255	2-iminobutanoate/2-iminopropanoate deaminase OS=Mus musculus OX=10090 GN=Rida PE=1 SV=3
1758	11778	Q61490	15.35	211.69	567150	591220	624500	421690	514120	561390	0.96	1	1.06	0.71	0.87	0.95	567150	591220	624500	421690	514120	561390	0.96	1	1.06	0.71	0.87	0.95	20	9	9	Carbamidomethylation; TMT10plex	65092	CD166 antigen OS=Mus musculus OX=10090 GN=Alcam PE=1 SV=3
872	15762	Q91X78	15.64	211.69	714290	767080	788080	643020	527900	616280	0.93	1	1.03	0.84	0.69	0.8	714290	767080	788080	643020	527900	616280	0.93	1	1.03	0.84	0.69	0.8	15	11	7	TMT10plex	39182	Erlin-1 OS=Mus musculus OX=10090 GN=Erlin1 PE=1 SV=2
1554	15733	Q8BZS9	9.72	211.61	995650	989540	1060800	1309000	1140600	1108800	1.01	1	1.07	1.32	1.15	1.12	995650	989540	1060800	1309000	1140600	1108800	1.01	1	1.07	1.32	1.15	1.12	16	11	11	Carbamidomethylation; TMT10plex	83941	Putative pre-mRNA-splicing factor ATP-dependent RNA helicase DHX32 OS=Mus musculus OX=10090 GN=Dhx32 PE=1 SV=2
456	12846	P62751	12.36	211.61	18216000	17119000	22266000	20551000	21513000	22159000	1.06	1	1.3	1.2	1.26	1.29	18216000	17119000	22266000	20551000	21513000	22159000	1.06	1	1.3	1.2	1.26	1.29	51	12	12	TMT10plex; Oxidation (M)	17695	60S ribosomal protein L23a OS=Mus musculus OX=10090 GN=Rpl23a PE=1 SV=1
840	15765	P47963	11.38	211.61	7351500	8695300	8169500	8117800	7698500	6370100	0.85	1	0.94	0.93	0.89	0.73	7351500	8695300	8169500	8117800	7698500	6370100	0.85	1	0.94	0.93	0.89	0.73	38	9	9	TMT10plex; Oxidation (M)	24305	60S ribosomal protein L13 OS=Mus musculus OX=10090 GN=Rpl13 PE=1 SV=3
1212	15745	Q8VHI3	2.09	211.51	1539300	1487600	1496600	1421000	1457100	1512800	1.03	1	1.01	0.96	0.98	1.02	1539300	1487600	1496600	1421000	1457100	1512800	1.03	1	1.01	0.96	0.98	1.02	24	10	10	Carbamidomethylation; TMT10plex	49429	GDP-fucose protein O-fucosyltransferase 2 OS=Mus musculus OX=10090 GN=Pofut2 PE=1 SV=1
1193	1279	Q9JKM7	7.87	211.43	367940	325190	403140	426040	335280	384190	1.13	1	1.24	1.31	1.03	1.18	367940	325190	403140	426040	335280	384190	1.13	1	1.24	1.31	1.03	1.18	35	9	7	Carbamidomethylation; TMT10plex	24656	Ras-related protein Rab-37 OS=Mus musculus OX=10090 GN=Rab37 PE=1 SV=2
2235	15898	Q9DCC4	6.77	211.37	2147600	2306900	2442200	2560600	2568000	2601600	0.93	1	1.06	1.11	1.11	1.13	2147600	2306900	2442200	2560600	2568000	2601600	0.93	1	1.06	1.11	1.11	1.13	29	7	7	Carbamidomethylation; TMT10plex	28721	Pyrroline-5-carboxylate reductase 3 OS=Mus musculus OX=10090 GN=Pycr3 PE=1 SV=2
719	1899	Q8BML9	5.8	211.33	1417300	1400600	1452300	1300700	1305100	1234500	1.01	1	1.04	0.93	0.93	0.88	1417300	1400600	1452300	1300700	1305100	1234500	1.01	1	1.04	0.93	0.93	0.88	27	18	18	Carbamidomethylation; TMT10plex	87677	Glutamine--tRNA ligase OS=Mus musculus OX=10090 GN=Qars1 PE=1 SV=1
1406	7621	Q9DC70	8.7	211.27	5476900	4826900	5693000	4898100	4719600	4627100	1.13	1	1.18	1.01	0.98	0.96	5476900	4826900	5693000	4898100	4719600	4627100	1.13	1	1.18	1.01	0.98	0.96	23	7	7	TMT10plex; Oxidation (M)	24683	NADH dehydrogenase [ubiquinone] iron-sulfur protein 7 mitochondrial OS=Mus musculus OX=10090 GN=Ndufs7 PE=1 SV=1
1816	15780	Q9CXG3	26.73	211.15	549060	496260	591140	485320	416520	376200	1.11	1	1.19	0.98	0.84	0.76	549060	496260	591140	485320	416520	376200	1.11	1	1.19	0.98	0.84	0.76	22	8	8	Carbamidomethylation; TMT10plex	57230	Peptidyl-prolyl cis-trans isomerase-like 4 OS=Mus musculus OX=10090 GN=Ppil4 PE=1 SV=2
1549	15914	Q60972	18.82	211.05	104200	105910	62353	85960	86504	64949	0.98	1	0.59	0.81	0.82	0.61	104200	105910	62353	85960	86504	64949	0.98	1	0.59	0.81	0.82	0.61	6	8	2	Carbamidomethylation; TMT10plex; Oxidation (M)	47656	Histone-binding protein RBBP4 OS=Mus musculus OX=10090 GN=Rbbp4 PE=1 SV=5
1951	12499	Q61466	11.49	210.78	143040	143150	188210	195460	152850	128880	1	1	1.31	1.37	1.07	0.9	143040	143150	188210	195460	152850	128880	1	1	1.31	1.37	1.07	0.9	15	8	6	Carbamidomethylation; TMT10plex	58245	SWI/SNF-related matrix-associated actin-dependent regulator of chromatin subfamily D member 1 OS=Mus musculus OX=10090 GN=Smarcd1 PE=1 SV=3
1426	12887	O88587	8.84	210.73	283680	314350	353400	271010	300830	336060	0.9	1	1.12	0.86	0.96	1.07	283680	314350	353400	271010	300830	336060	0.9	1	1.12	0.86	0.96	1.07	52	9	9	Carbamidomethylation; TMT10plex	29486	Catechol O-methyltransferase OS=Mus musculus OX=10090 GN=Comt PE=1 SV=2
736	183	P55302	36.45	210.71	8553300	6734700	8666900	9765400	11229000	12161000	1.27	1	1.29	1.45	1.67	1.81	8553300	6734700	8666900	9765400	11229000	12161000	1.27	1	1.29	1.45	1.67	1.81	42	15	15	TMT10plex	42215	Alpha-2-macroglobulin receptor-associated protein OS=Mus musculus OX=10090 GN=Lrpap1 PE=1 SV=1
1625	5723	Q9DB15	8.26	210.53	2393800	2895600	2386700	2370500	2401500	2905900	0.83	1	0.82	0.82	0.83	1	2393800	2895600	2386700	2370500	2401500	2905900	0.83	1	0.82	0.82	0.83	1	29	6	6	TMT10plex	21708	39S ribosomal protein L12 mitochondrial OS=Mus musculus OX=10090 GN=Mrpl12 PE=1 SV=2
2229	7775	Q8VCI5	11.88	210.51	736250	734500	758990	975260	781050	902500	1	1	1.03	1.33	1.06	1.23	736250	734500	758990	975260	781050	902500	1	1	1.03	1.33	1.06	1.23	26	6	6	Carbamidomethylation; TMT10plex	32733	Peroxisomal biogenesis factor 19 OS=Mus musculus OX=10090 GN=Pex19 PE=1 SV=1
1011	9575	Q9JKB1	2.53	210.44	1737800	1670100	1835000	1770500	1692800	1898300	1.04	1	1.1	1.06	1.01	1.14	1737800	1670100	1835000	1770500	1692800	1898300	1.04	1	1.1	1.06	1.01	1.14	39	10	10	Carbamidomethylation; TMT10plex	26152	Ubiquitin carboxyl-terminal hydrolase isozyme L3 OS=Mus musculus OX=10090 GN=Uchl3 PE=1 SV=2
1188	11545	Q9R0Y5	2.14	210.42	1921300	2091500	1966300	2063300	1984100	1927300	0.92	1	0.94	0.99	0.95	0.92	1921300	2091500	1966300	2063300	1984100	1927300	0.92	1	0.94	0.99	0.95	0.92	60	10	10	Carbamidomethylation; TMT10plex	21540	Adenylate kinase isoenzyme 1 OS=Mus musculus OX=10090 GN=Ak1 PE=1 SV=1
1431	15902	Q9D892	76.86	210.34	728270	896700	812230	619050	600830	373340	0.81	1	0.91	0.69	0.67	0.42	728270	896700	812230	619050	600830	373340	0.81	1	0.91	0.69	0.67	0.42	60	8	8	Carbamidomethylation; TMT10plex; Oxidation (M)	21897	Inosine triphosphate pyrophosphatase OS=Mus musculus OX=10090 GN=Itpa PE=1 SV=2
1329	7067	Q9QXT0	39.03	210.32	3792100	3228200	4200900	4353500	5494500	5969900	1.17	1	1.3	1.35	1.7	1.85	3792100	3228200	4200900	4353500	5494500	5969900	1.17	1	1.3	1.35	1.7	1.85	43	8	8	Carbamidomethylation; TMT10plex	20767	Protein canopy homolog 2 OS=Mus musculus OX=10090 GN=Cnpy2 PE=1 SV=1
985	15881	P56959	43.11	210.23	1446700	1347600	1696500	1858100	2366400	2335500	1.07	1	1.26	1.38	1.76	1.73	1446700	1347600	1696500	1858100	2366400	2335500	1.07	1	1.26	1.38	1.76	1.73	17	8	8	Carbamidomethylation; TMT10plex	52673	RNA-binding protein FUS OS=Mus musculus OX=10090 GN=Fus PE=1 SV=1
1236	12226	Q68FF6	3.69	210.22	695050	780910	773020	683550	806300	692400	0.89	1	0.99	0.88	1.03	0.89	695050	780910	773020	683550	806300	692400	0.89	1	0.99	0.88	1.03	0.89	17	13	10	Carbamidomethylation; TMT10plex	85300	ARF GTPase-activating protein GIT1 OS=Mus musculus OX=10090 GN=Git1 PE=1 SV=1
1060	15724	Q9QXE7	11.76	210.12	1960600	2310900	1782500	1854300	1792000	1796400	0.85	1	0.77	0.8	0.78	0.78	1960600	2310900	1782500	1854300	1792000	1796400	0.85	1	0.77	0.8	0.78	0.78	28	11	11	Carbamidomethylation; TMT10plex	56802	F-box-like/WD repeat-containing protein TBL1X OS=Mus musculus OX=10090 GN=Tbl1x PE=1 SV=2
1201	5680	Q91VU0	8.33	210	1213000	1319700	1050100	1028900	1121900	1142500	0.92	1	0.8	0.78	0.85	0.87	1213000	1319700	1050100	1028900	1121900	1142500	0.92	1	0.8	0.78	0.85	0.87	42	8	8	Carbamidomethylation; TMT10plex	24753	Protein FAM3C OS=Mus musculus OX=10090 GN=Fam3c PE=1 SV=1
903	15153	Q9D7N9	5.07	209.99	4607100	4415100	4196800	4334400	3997800	3748800	1.04	1	0.95	0.98	0.91	0.85	4607100	4415100	4196800	4334400	3997800	3748800	1.04	1	0.95	0.98	0.91	0.85	30	14	14	Carbamidomethylation; TMT10plex	46434	Adipocyte plasma membrane-associated protein OS=Mus musculus OX=10090 GN=Apmap PE=1 SV=1
1938	15861	O08917	17.66	209.84	191380	234960	187230	155820	223560	254850	0.81	1	0.8	0.66	0.95	1.08	191380	234960	187230	155820	223560	254850	0.81	1	0.8	0.66	0.95	1.08	21	7	7	Carbamidomethylation; TMT10plex	47513	Flotillin-1 OS=Mus musculus OX=10090 GN=Flot1 PE=1 SV=1
1136	917	Q80TV8	2.4	209.8	292320	299110	287730	280640	276720	281200	0.98	1	0.96	0.94	0.93	0.94	292320	299110	287730	280640	276720	281200	0.98	1	0.96	0.94	0.93	0.94	7	13	9	Carbamidomethylation; TMT10plex	169227	CLIP-associating protein 1 OS=Mus musculus OX=10090 GN=Clasp1 PE=1 SV=2
1755	12161	O70152	15.64	209.72	497150	509960	493560	537180	514640	363430	0.97	1	0.97	1.05	1.01	0.71	497150	509960	493560	537180	514640	363430	0.97	1	0.97	1.05	1.01	0.71	31	8	8	TMT10plex	29175	Dolichol-phosphate mannosyltransferase subunit 1 OS=Mus musculus OX=10090 GN=Dpm1 PE=1 SV=1
943	6226	Q99KF1	11.59	209.67	3097800	2983100	2649600	2919600	2319000	2721200	1.04	1	0.89	0.98	0.78	0.91	3097800	2983100	2649600	2919600	2319000	2721200	1.04	1	0.89	0.98	0.78	0.91	41	9	8	Carbamidomethylation; TMT10plex; Oxidation (M)	27127	Transmembrane emp24 domain-containing protein 9 OS=Mus musculus OX=10090 GN=Tmed9 PE=1 SV=2
2144	2819	Q9D0G0	8.55	209.63	662290	565500	712590	681610	694040	583260	1.17	1	1.26	1.21	1.23	1.03	662290	565500	712590	681610	694040	583260	1.17	1	1.26	1.21	1.23	1.03	16	6	6	TMT10plex	49939	28S ribosomal protein S30 mitochondrial OS=Mus musculus OX=10090 GN=Mrps30 PE=1 SV=1
808	3485	O35474	20.3	209.44	2025600	2228600	2292800	1619300	2155800	1599000	0.91	1	1.03	0.73	0.97	0.72	2025600	2228600	2292800	1619300	2155800	1599000	0.91	1	1.03	0.73	0.97	0.72	31	14	14	Carbamidomethylation; TMT10plex	53712	EGF-like repeat and discoidin I-like domain-containing protein 3 OS=Mus musculus OX=10090 GN=Edil3 PE=1 SV=2
1095	1846	O70251	20.78	209.43	27293000	23774000	28100000	31827000	31116000	36968000	1.15	1	1.18	1.34	1.31	1.55	27293000	23774000	28100000	31827000	31116000	36968000	1.15	1	1.18	1.34	1.31	1.55	38	10	10	Carbamidomethylation; TMT10plex	24694	Elongation factor 1-beta OS=Mus musculus OX=10090 GN=Eef1b PE=1 SV=5
935	15716	P36993	3.84	209.42	2253800	1945800	2265600	2145900	2152800	2017600	1.16	1	1.16	1.1	1.11	1.04	2253800	1945800	2265600	2145900	2152800	2017600	1.16	1	1.16	1.1	1.11	1.04	28	12	10	Carbamidomethylation; TMT10plex	42795	Protein phosphatase 1B OS=Mus musculus OX=10090 GN=Ppm1b PE=1 SV=1
1785	3883	Q99LI2	10.78	209.38	534740	528340	472790	475020	415650	403120	1.01	1	0.89	0.9	0.79	0.76	534740	528340	472790	475020	415650	403120	1.01	1	0.89	0.9	0.79	0.76	17	8	8	Carbamidomethylation; TMT10plex	60621	Chloride channel CLIC-like protein 1 OS=Mus musculus OX=10090 GN=Clcc1 PE=1 SV=1
1198	6227	Q9CWZ7	2.26	209.31	3380200	3193400	3462700	3368800	3362900	3354600	1.06	1	1.08	1.05	1.05	1.05	3380200	3193400	3462700	3368800	3362900	3354600	1.06	1	1.08	1.05	1.05	1.05	31	10	10	Carbamidomethylation; TMT10plex	34732	Gamma-soluble NSF attachment protein OS=Mus musculus OX=10090 GN=Napg PE=1 SV=1
1387	2199	P12960	18.58	209.16	909210	937780	731820	877960	1029400	938660	0.97	1	0.78	0.94	1.1	1	909210	937780	731820	877960	1029400	938660	0.97	1	0.78	0.94	1.1	1	18	12	12	Carbamidomethylation; TMT10plex	113388	Contactin-1 OS=Mus musculus OX=10090 GN=Cntn1 PE=1 SV=1
898	2180	P05132	36.73	209.09	745300	942050	808220	673690	731020	483650	0.79	1	0.86	0.72	0.78	0.51	745300	942050	808220	673690	731020	483650	0.79	1	0.86	0.72	0.78	0.51	22	12	7	TMT10plex	40571	cAMP-dependent protein kinase catalytic subunit alpha OS=Mus musculus OX=10090 GN=Prkaca PE=1 SV=3
1616	14655	Q80T23	14.06	209.07	196260	200860	232540	199040	268570	277930	0.98	1	1.16	0.99	1.34	1.38	196260	200860	232540	199040	268570	277930	0.98	1	1.16	0.99	1.34	1.38	17	10	9	Carbamidomethylation; TMT10plex	84089	Synaptotagmin-like protein 5 OS=Mus musculus OX=10090 GN=Sytl5 PE=1 SV=1
883	3380	Q64213	9.6	209.03	1625200	1757900	1705000	1793600	1936800	2128300	0.92	1	0.97	1.02	1.1	1.21	1625200	1757900	1705000	1793600	1936800	2128300	0.92	1	0.97	1.02	1.1	1.21	19	11	11	Carbamidomethylation; TMT10plex	70403	Splicing factor 1 OS=Mus musculus OX=10090 GN=Sf1 PE=1 SV=6
1330	327	Q8BHC1	1.75	209	231080	236720	225930	231720	239800	217100	0.98	1	0.95	0.98	1.01	0.92	231080	236720	225930	231720	239800	217100	0.98	1	0.95	0.98	1.01	0.92	21	7	4	TMT10plex	24636	Ras-related protein Rab-39B OS=Mus musculus OX=10090 GN=Rab39b PE=1 SV=1
2074	4435	Q3TC93	11.4	208.95	389140	318930	433430	387360	338000	470750	1.22	1	1.36	1.21	1.06	1.48	389140	318930	433430	387360	338000	470750	1.22	1	1.36	1.21	1.06	1.48	25	8	8	TMT10plex	43691	HCLS1-binding protein 3 OS=Mus musculus OX=10090 GN=Hs1bp3 PE=1 SV=2
1280	14683	Q8JZM7	7.01	208.94	1367400	1543700	1234500	1423900	1428600	1173900	0.89	1	0.8	0.92	0.93	0.76	1367400	1543700	1234500	1423900	1428600	1173900	0.89	1	0.8	0.92	0.93	0.76	21	12	12	TMT10plex	60577	Parafibromin OS=Mus musculus OX=10090 GN=Cdc73 PE=1 SV=1
1076	3338	Q9D172	5.82	208.88	9429700	10077000	9412100	9104400	8623900	8926300	0.94	1	0.93	0.9	0.86	0.89	9429700	10077000	9412100	9104400	8623900	8926300	0.94	1	0.93	0.9	0.86	0.89	41	9	9	Carbamidomethylation; TMT10plex	28090	Glutamine amidotransferase-like class 1 domain-containing protein 3A mitochondrial OS=Mus musculus OX=10090 GN=Gatd3a PE=1 SV=1
1103	4892	Q9WUM4	4.33	208.86	5015700	4876200	4852000	5480100	4489800	4926400	1.03	1	1	1.12	0.92	1.01	5015700	4876200	4852000	5480100	4489800	4926400	1.03	1	1	1.12	0.92	1.01	26	13	12	Carbamidomethylation; TMT10plex	53121	Coronin-1C OS=Mus musculus OX=10090 GN=Coro1c PE=1 SV=2
835	1390	Q9QXL2	3.32	208.85	1721100	1793500	1680900	1865900	1859900	1744000	0.96	1	0.94	1.04	1.04	0.97	1721100	1793500	1680900	1865900	1859900	1744000	0.96	1	0.94	1.04	1.04	0.97	11	16	16	Carbamidomethylation; TMT10plex	186535	Kinesin-like protein KIF21A OS=Mus musculus OX=10090 GN=Kif21a PE=1 SV=2
1353	15731	E9Q4N7	2.98	208.82	369320	375600	391330	390200	370470	356580	0.98	1	1.04	1.04	0.99	0.95	369320	375600	391330	390200	370470	356580	0.98	1	1.04	1.04	0.99	0.95	5	10	9	TMT10plex	237793	AT-rich interactive domain-containing protein 1B OS=Mus musculus OX=10090 GN=Arid1b PE=1 SV=1
878	2093	P41105	5.29	208.76	5612000	5779200	6254800	5710400	5410500	6142200	0.97	1	1.08	0.99	0.94	1.06	5612000	5779200	6254800	5710400	5410500	6142200	0.97	1	1.08	0.99	0.94	1.06	45	9	9	Carbamidomethylation; TMT10plex	15733	60S ribosomal protein L28 OS=Mus musculus OX=10090 GN=Rpl28 PE=1 SV=2
1977	11387	Q99J99	4.47	208.74	1229900	1109700	1236000	1293000	1110500	1184700	1.11	1	1.11	1.17	1	1.07	1229900	1109700	1236000	1293000	1110500	1184700	1.11	1	1.11	1.17	1	1.07	28	7	7	TMT10plex	33097	3-mercaptopyruvate sulfurtransferase OS=Mus musculus OX=10090 GN=Mpst PE=1 SV=4
1102	1567	Q8C050	4.62	208.65	2620700	2488700	2626400	2471800	2304100	2312000	1.05	1	1.06	0.99	0.93	0.93	2620700	2488700	2626400	2471800	2304100	2312000	1.05	1	1.06	0.99	0.93	0.93	17	15	14	Carbamidomethylation; TMT10plex	96583	Ribosomal protein S6 kinase alpha-5 OS=Mus musculus OX=10090 GN=Rps6ka5 PE=1 SV=2
1493	15784	O88545	2.86	208.51	2388000	2458400	2414100	2204800	2371300	2329900	0.97	1	0.98	0.9	0.96	0.95	2388000	2458400	2414100	2204800	2371300	2329900	0.97	1	0.98	0.9	0.96	0.95	34	10	10	Carbamidomethylation; TMT10plex	35880	COP9 signalosome complex subunit 6 OS=Mus musculus OX=10090 GN=Cops6 PE=1 SV=1
730	8319	P63085	8.56	208.46	3717500	3538700	3556800	3160500	2843200	3118000	1.05	1	1.01	0.89	0.8	0.88	3717500	3538700	3556800	3160500	2843200	3118000	1.05	1	1.01	0.89	0.8	0.88	27	12	9	Carbamidomethylation; TMT10plex	41276	Mitogen-activated protein kinase 1 OS=Mus musculus OX=10090 GN=Mapk1 PE=1 SV=3
1983	1622	Q7M6Y3	7.51	208.4	275290	277060	286300	254500	226030	243210	0.99	1	1.03	0.92	0.82	0.88	275290	277060	286300	254500	226030	243210	0.99	1	1.03	0.92	0.82	0.88	9	7	7	TMT10plex	71543	Phosphatidylinositol-binding clathrin assembly protein OS=Mus musculus OX=10090 GN=Picalm PE=1 SV=1
1072	8422	P46660	4.85	208.26	949760	1030400	1044600	1061600	1017600	1196700	0.92	1	1.01	1.03	0.99	1.16	949760	1030400	1044600	1061600	1017600	1196700	0.92	1	1.01	1.03	0.99	1.16	31	14	13	TMT10plex	55383	Alpha-internexin OS=Mus musculus OX=10090 GN=Ina PE=1 SV=3
1267	7457	Q61074	8.98	208.14	1322900	1378900	1256200	1063600	1180800	1338700	0.96	1	0.91	0.77	0.86	0.97	1322900	1378900	1256200	1063600	1180800	1338700	0.96	1	0.91	0.77	0.86	0.97	18	10	10	TMT10plex	58728	Protein phosphatase 1G OS=Mus musculus OX=10090 GN=Ppm1g PE=1 SV=3
1509	9034	P54731	3.91	208.01	233320	220430	215980	233640	209200	242360	1.06	1	0.98	1.06	0.95	1.1	233320	220430	215980	233640	209200	242360	1.06	1	0.98	1.06	0.95	1.1	18	10	10	Carbamidomethylation; TMT10plex	73863	FAS-associated factor 1 OS=Mus musculus OX=10090 GN=Faf1 PE=1 SV=2
2000	15989	Q9R1P1	15.01	207.99	2075400	1877500	2371500	2269400	1760100	1885800	1.11	1	1.26	1.21	0.94	1	2075400	1877500	2371500	2269400	1760100	1885800	1.11	1	1.26	1.21	0.94	1	32	8	8	TMT10plex	22965	Proteasome subunit beta type-3 OS=Mus musculus OX=10090 GN=Psmb3 PE=1 SV=1
1437	15832	P47754	16.45	207.92	1496800	1562000	1320000	1557800	1138800	1519800	0.96	1	0.85	1	0.73	0.97	1496800	1562000	1320000	1557800	1138800	1519800	0.96	1	0.85	1	0.73	0.97	27	9	6	Carbamidomethylation; TMT10plex	32967	F-actin-capping protein subunit alpha-2 OS=Mus musculus OX=10090 GN=Capza2 PE=1 SV=3
1957	7347	Q3UH60	6.96	207.9	351850	369360	368750	295740	381240	324840	0.95	1	1	0.8	1.03	0.88	351850	369360	368750	295740	381240	324840	0.95	1	1	0.8	1.03	0.88	5	7	6	TMT10plex	171125	Disco-interacting protein 2 homolog B OS=Mus musculus OX=10090 GN=Dip2b PE=1 SV=1
1541	15798	Q5SRX1	5.39	207.67	1421100	1294900	1546300	1379500	1397500	1374000	1.1	1	1.19	1.07	1.08	1.06	1421100	1294900	1546300	1379500	1397500	1374000	1.1	1	1.19	1.07	1.08	1.06	22	9	9	TMT10plex	55663	TOM1-like protein 2 OS=Mus musculus OX=10090 GN=Tom1l2 PE=1 SV=1
939	6215	Q9R0X4	9.19	207.59	2162700	2382300	2088700	1818600	1923600	1857900	0.91	1	0.88	0.76	0.81	0.78	2162700	2382300	2088700	1818600	1923600	1857900	0.91	1	0.88	0.76	0.81	0.78	31	14	14	Carbamidomethylation; TMT10plex	50561	Acyl-coenzyme A thioesterase 9 mitochondrial OS=Mus musculus OX=10090 GN=Acot9 PE=1 SV=1
1478	2357	O08539	11.69	207.56	719520	667340	799350	825620	859700	804670	1.08	1	1.2	1.24	1.29	1.21	719520	667340	799350	825620	859700	804670	1.08	1	1.2	1.24	1.29	1.21	18	8	8	Carbamidomethylation; TMT10plex	64470	Myc box-dependent-interacting protein 1 OS=Mus musculus OX=10090 GN=Bin1 PE=1 SV=1
951	1207	Q60823	4.12	207.48	882050	844060	889900	756160	767330	834300	1.05	1	1.05	0.9	0.91	0.99	882050	844060	889900	756160	767330	834300	1.05	1	1.05	0.9	0.91	0.99	20	14	9	Carbamidomethylation; TMT10plex	55742	RAC-beta serine/threonine-protein kinase OS=Mus musculus OX=10090 GN=Akt2 PE=1 SV=1
1440	15985	Q80UU9	8.48	207.47	1376600	1362500	1380200	1227600	1125900	1212300	1.01	1	1.01	0.9	0.83	0.89	1376600	1362500	1380200	1227600	1125900	1212300	1.01	1	1.01	0.9	0.83	0.89	38	7	7	Carbamidomethylation; TMT10plex	23334	Membrane-associated progesterone receptor component 2 OS=Mus musculus OX=10090 GN=Pgrmc2 PE=1 SV=2
1966	4812	Q8BKX1	61.83	207.29	157150	177340	149100	151520	151910	297130	0.89	1	0.84	0.85	0.86	1.68	157150	177340	149100	151520	151910	297130	0.89	1	0.84	0.85	0.86	1.68	14	8	8	Carbamidomethylation; TMT10plex	59237	Brain-specific angiogenesis inhibitor 1-associated protein 2 OS=Mus musculus OX=10090 GN=Baiap2 PE=1 SV=2
753	535	P19253	8.34	207.25	8815400	10696000	10898000	10336000	9936500	9747000	0.82	1	1.02	0.97	0.93	0.91	8815400	10696000	10898000	10336000	9936500	9747000	0.82	1	1.02	0.97	0.93	0.91	37	9	9	Carbamidomethylation; TMT10plex; Oxidation (M)	23464	60S ribosomal protein L13a OS=Mus musculus OX=10090 GN=Rpl13a PE=1 SV=4
1157	3852	P11679	9.01	207.15	600620	488740	584320	679500	483620	528770	1.23	1	1.2	1.39	0.99	1.08	600620	488740	584320	679500	483620	528770	1.23	1	1.2	1.39	0.99	1.08	17	11	8	TMT10plex	54565	Keratin type II cytoskeletal 8 OS=Mus musculus OX=10090 GN=Krt8 PE=1 SV=4
1029	1740	P45591	13.76	207.12	1016900	1056400	922640	980120	796980	894130	0.96	1	0.87	0.93	0.75	0.85	1016900	1056400	922640	980120	796980	894130	0.96	1	0.87	0.93	0.75	0.85	42	9	7	Carbamidomethylation; TMT10plex	18710	Cofilin-2 OS=Mus musculus OX=10090 GN=Cfl2 PE=1 SV=1
1595	13208	O55125	21.14	207.06	1848100	1689600	1743800	2127100	2445100	1533800	1.09	1	1.03	1.26	1.45	0.91	1848100	1689600	1743800	2127100	2445100	1533800	1.09	1	1.03	1.26	1.45	0.91	27	8	8	Carbamidomethylation; TMT10plex	33363	Protein NipSnap homolog 1 OS=Mus musculus OX=10090 GN=Nipsnap1 PE=1 SV=1
1460	1039	Q99MI1	22.92	207.04	712690	543600	769910	819020	801460	755390	1.31	1	1.42	1.51	1.47	1.39	712690	543600	769910	819020	801460	755390	1.31	1	1.42	1.51	1.47	1.39	9	10	10	TMT10plex	128330	ELKS/Rab6-interacting/CAST family member 1 OS=Mus musculus OX=10090 GN=Erc1 PE=1 SV=1
1170	12392	Q8JZN5	7.7	207.03	1921100	2115300	1938700	1835200	1967900	1602700	0.91	1	0.92	0.87	0.93	0.76	1921100	2115300	1938700	1835200	1967900	1602700	0.91	1	0.92	0.87	0.93	0.76	19	12	12	TMT10plex	68722	Complex I assembly factor ACAD9 mitochondrial OS=Mus musculus OX=10090 GN=Acad9 PE=1 SV=2
1664	10606	Q3TIU4	34.61	206.91	264320	289230	273420	252090	176120	193500	0.91	1	0.95	0.87	0.61	0.67	264320	289230	273420	252090	176120	193500	0.91	1	0.95	0.87	0.61	0.67	20	9	9	Carbamidomethylation; TMT10plex	67514	2' 5'-phosphodiesterase 12 OS=Mus musculus OX=10090 GN=Pde12 PE=1 SV=2
1678	15796	Q61187	9.54	206.91	864750	1018700	770530	903150	838080	827020	0.85	1	0.76	0.89	0.82	0.81	864750	1018700	770530	903150	838080	827020	0.85	1	0.76	0.89	0.82	0.81	30	10	10	TMT10plex	44124	Tumor susceptibility gene 101 protein OS=Mus musculus OX=10090 GN=Tsg101 PE=1 SV=2
916	16032	Q9D1D4	15.42	206.85	3315500	2967600	3163000	3034400	2335600	2537600	1.12	1	1.07	1.02	0.79	0.86	3315500	2967600	3163000	3034400	2335600	2537600	1.12	1	1.07	1.02	0.79	0.86	34	7	7	TMT10plex; Oxidation (M)	24911	Transmembrane emp24 domain-containing protein 10 OS=Mus musculus OX=10090 GN=Tmed10 PE=1 SV=1
473	3183	P12849	8.04	206.76	1835200	1800800	1652600	1735100	1422600	1664900	1.02	1	0.92	0.96	0.79	0.92	1835200	1800800	1652600	1735100	1422600	1664900	1.02	1	0.92	0.96	0.79	0.92	31	17	12	Carbamidomethylation; TMT10plex	43224	cAMP-dependent protein kinase type I-beta regulatory subunit OS=Mus musculus OX=10090 GN=Prkar1b PE=1 SV=2
1081	10017	Q922U1	10.04	206.75	1737000	1696900	1716100	1725900	1365400	1466800	1.02	1	1.01	1.02	0.8	0.86	1737000	1696900	1716100	1725900	1365400	1466800	1.02	1	1.01	1.02	0.8	0.86	28	15	15	Carbamidomethylation; TMT10plex	77455	U4/U6 small nuclear ribonucleoprotein Prp3 OS=Mus musculus OX=10090 GN=Prpf3 PE=1 SV=1
1468	171	Q99LM2	1.67	206.74	1636100	1713500	1737700	1673100	1803500	1718100	0.95	1	1.01	0.98	1.05	1	1636100	1713500	1737700	1673100	1803500	1718100	0.95	1	1.01	0.98	1.05	1	20	11	11	Carbamidomethylation; TMT10plex	56991	CDK5 regulatory subunit-associated protein 3 OS=Mus musculus OX=10090 GN=Cdk5rap3 PE=1 SV=1
1091	13276	Q8R1F6	1.72	206.72	1598900	1615700	1598800	1496400	1640700	1537000	0.99	1	0.99	0.93	1.02	0.95	1598900	1615700	1598800	1496400	1640700	1537000	0.99	1	0.99	0.93	1.02	0.95	17	12	12	Carbamidomethylation; TMT10plex	88779	Protein HID1 OS=Mus musculus OX=10090 GN=Hid1 PE=1 SV=1
2425	15936	P61963	4.79	206.6	813470	845700	738780	729470	761870	721210	0.96	1	0.87	0.86	0.9	0.85	813470	845700	738780	729470	761870	721210	0.96	1	0.87	0.86	0.9	0.85	25	6	6	Carbamidomethylation; TMT10plex	38926	DDB1- and CUL4-associated factor 7 OS=Mus musculus OX=10090 GN=Dcaf7 PE=1 SV=1
1670	15876	Q6PE15	6.73	206.46	1396800	1578100	1610400	1335000	1753800	1779900	0.89	1	1.02	0.85	1.11	1.13	1396800	1578100	1610400	1335000	1753800	1779900	0.89	1	1.02	0.85	1.11	1.13	26	7	7	Carbamidomethylation; TMT10plex	33040	Mycophenolic acid acyl-glucuronide esterase mitochondrial OS=Mus musculus OX=10090 GN=Abhd10 PE=1 SV=1
1749	1397	Q99JR8	9.61	206.45	871160	920040	896480	800330	991510	688510	0.95	1	0.97	0.87	1.08	0.75	871160	920040	896480	800330	991510	688510	0.95	1	0.97	0.87	1.08	0.75	18	9	7	TMT10plex	59085	SWI/SNF-related matrix-associated actin-dependent regulator of chromatin subfamily D member 2 OS=Mus musculus OX=10090 GN=Smarcd2 PE=1 SV=2
[truncated: 4,014 more rows]
